# Supplementary material for: Systematic estimates of the global, regional and national under-5 mortality burden attributable to birth defects in 2000–2019: a summary of findings from the 2020 WHO estimates
Source: HighWire-hosted journal article supplement (doi:10.1136/bmjopen-2022-067033), 2023-01-01
Supplement: bmjopen-2022-067033supp002_data_supplement.pdf [file bmjopen-2022-067033supp002_data_supplement.pdf]

| iso3 | year | level   | whoreg6 | whoname     | nnd   | pnd    | u5d    | nmr       | pnmr      | u5mr      | Livebirths | Neonatal birth defects deaths | 1-59 month birth defects deaths | Under five birth defects deaths |
|------|------|---------|---------|-------------|-------|--------|--------|-----------|-----------|-----------|------------|-------------------------------|---------------------------------|---------------------------------|
| AFG  | 2000 | country | 5_Emr   | Afghanistan | 62013 | 68593  | 130606 | 0.0606273 | 0.06706   | 0.1276872 | 1022857    | 1633                          | 348                             | 1981                            |
| AFG  | 2001 | country | 5_Emr   | Afghanistan | 62301 | 72136  | 134437 | 0.0594359 | 0.0688187 | 0.1282545 | 1048206    | 1712                          | 476                             | 2188                            |
| AFG  | 2002 | country | 5_Emr   | Afghanistan | 62343 | 64259  | 126602 | 0.0582014 | 0.0599898 | 0.1181913 | 1071159    | 1780                          | 478                             | 2258                            |
| AFG  | 2003 | country | 5_Emr   | Afghanistan | 62210 | 56611  | 118821 | 0.0569443 | 0.0518196 | 0.108764  | 1092470    | 1895                          | 559                             | 2454                            |
| AFG  | 2004 | country | 5_Emr   | Afghanistan | 61887 | 55547  | 117434 | 0.0556444 | 0.0499438 | 0.1055882 | 1112187    | 1964                          | 733                             | 2698                            |
| AFG  | 2005 | country | 5_Emr   | Afghanistan | 61321 | 55845  | 117166 | 0.0542683 | 0.0494224 | 0.1036907 | 1129961    | 2035                          | 803                             | 2838                            |
| AFG  | 2006 | country | 5_Emr   | Afghanistan | 60571 | 59132  | 119703 | 0.0528926 | 0.0516361 | 0.1045287 | 1145170    | 2106                          | 891                             | 2997                            |
| AFG  | 2007 | country | 5_Emr   | Afghanistan | 59600 | 52198  | 111798 | 0.0514964 | 0.0451004 | 0.0965968 | 1157363    | 2145                          | 967                             | 3112                            |
| AFG  | 2008 | country | 5_Emr   | Afghanistan | 58432 | 50335  | 108767 | 0.0500951 | 0.0431535 | 0.0932486 | 1166422    | 2173                          | 1105                            | 3278                            |
| AFG  | 2009 | country | 5_Emr   | Afghanistan | 57037 | 50752  | 107789 | 0.0486373 | 0.0432776 | 0.0919149 | 1172701    | 2213                          | 1182                            | 3395                            |
| AFG  | 2010 | country | 5_Emr   | Afghanistan | 55545 | 47502  | 103047 | 0.0472009 | 0.0403659 | 0.0875688 | 1167779    | 2229                          | 1274                            | 3503                            |
| AFG  | 2011 | country | 5_Emr   | Afghanistan | 53977 | 45860  | 99837  | 0.0457621 | 0.0388806 | 0.0846427 | 1179513    | 2264                          | 1347                            | 3612                            |
| AFG  | 2012 | country | 5_Emr   | Afghanistan | 52436 | 43521  | 95957  | 0.0443712 | 0.0368276 | 0.0811988 | 1181757    | 2267                          | 1197                            | 3464                            |
| AFG  | 2013 | country | 5_Emr   | Afghanistan | 50916 | 38054  | 88970  | 0.0429949 | 0.0321338 | 0.0751287 | 1184233    | 2312                          | 1131                            | 3442                            |
| AFG  | 2014 | country | 5_Emr   | Afghanistan | 49416 | 36495  | 85911  | 0.0416161 | 0.0307342 | 0.0723503 | 1187426    | 2331                          | 1260                            | 3591                            |
| AFG  | 2015 | country | 5_Emr   | Afghanistan | 47981 | 35288  | 83269  | 0.0402705 | 0.0296168 | 0.0698874 | 1191467    | 2365                          | 1370                            | 3735                            |
| AFG  | 2016 | country | 5_Emr   | Afghanistan | 46717 | 32912  | 79629  | 0.0390523 | 0.027512  | 0.0665643 | 1196268    | 2410                          | 1375                            | 3785                            |
| AFG  | 2017 | country | 5_Emr   | Afghanistan | 45625 | 32098  | 77723  | 0.0379776 | 0.0267178 | 0.0646954 | 1201366    | 2441                          | 1347                            | 3787                            |
| AFG  | 2018 | country | 5_Emr   | Afghanistan | 44503 | 31643  | 76146  | 0.0368932 | 0.0262323 | 0.0631254 | 1206267    | 2433                          | 1343                            | 3776                            |
| AFG  | 2019 | country | 5_Emr   | Afghanistan | 43424 | 28362  | 71786  | 0.0358629 | 0.0234238 | 0.0592866 | 1210834    | 2437                          | 1314                            | 3751                            |
| AGO  | 2000 | country | 1_Afr   | Angola      | 39789 | 113195 | 152984 | 0.0502843 | 0.1430524 | 0.1933367 | 791281     | 1393                          | 139                             | 1531                            |
| AGO  | 2001 | country | 1_Afr   | Angola      | 40193 | 115579 | 155772 | 0.0492404 | 0.1415952 | 0.1908356 | 816261     | 1435                          | 314                             | 1749                            |
| AGO  | 2002 | country | 1_Afr   | Angola      | 40399 | 117618 | 158017 | 0.0479473 | 0.1395938 | 0.1875411 | 842572     | 1497                          | 235                             | 1732                            |
| AGO  | 2003 | country | 1_Afr   | Angola      | 40568 | 112294 | 152862 | 0.046634  | 0.1290847 | 0.1757187 | 869924     | 1536                          | 182                             | 1718                            |
| AGO  | 2004 | country | 1_Afr   | Angola      | 40565 | 105424 | 145989 | 0.0451695 | 0.1173909 | 0.1625604 | 898062     | 1603                          | 206                             | 1809                            |
| AGO  | 2005 | country | 1_Afr   | Angola      | 40414 | 103204 | 143618 | 0.0436084 | 0.1113619 | 0.1549704 | 926747     | 1639                          | 135                             | 1774                            |
| AGO  | 2006 | country | 1_Afr   | Angola      | 40110 | 100670 | 140780 | 0.0419708 | 0.1053401 | 0.1473109 | 955664     | 1696                          | 162                             | 1858                            |
| AGO  | 2007 | country | 1_Afr   | Angola      | 39809 | 95599  | 135408 | 0.040435  | 0.0971019 | 0.1375368 | 984519     | 1723                          | 517                             | 2240                            |
| AGO  | 2008 | country | 1_Afr   | Angola      | 39490 | 91766  | 131256 | 0.0389821 | 0.0905856 | 0.1295677 | 1013028    | 1803                          | 502                             | 2305                            |
| AGO  | 2009 | country | 1_Afr   | Angola      | 39122 | 88699  | 127821 | 0.037586  | 0.0852161 | 0.1228021 | 1040866    | 1841                          | 571                             | 2412                            |
| AGO  | 2010 | country | 1_Afr   | Angola      | 38656 | 82804  | 121460 | 0.0362039 | 0.0775517 | 0.1137556 | 1067730    | 1892                          | 970                             | 2862                            |
| AGO  | 2011 | country | 1_Afr   | Angola      | 38148 | 79083  | 117231 | 0.034895  | 0.0723393 | 0.1072342 | 1093223    | 1902                          | 942                             | 2844                            |
| AGO  | 2012 | country | 1_Afr   | Angola      | 37635 | 74301  | 111936 | 0.0336784 | 0.0664899 | 0.1001683 | 1117481    | 1952                          | 1236                            | 3187                            |
| AGO  | 2013 | country | 1_Afr   | Angola      | 37255 | 72502  | 109757 | 0.032659  | 0.0635575 | 0.0962165 | 1140726    | 1976                          | 1126                            | 3102                            |
| AGO  | 2014 | country | 1_Afr   | Angola      | 36745 | 73640  | 110385 | 0.0315876 | 0.0633038 | 0.0948915 | 1163272    | 2022                          | 1144                            | 3167                            |
| AGO  | 2015 | country | 1_Afr   | Angola      | 36317 | 64216  | 100533 | 0.0306335 | 0.0541659 | 0.0847994 | 1185533    | 2029                          | 1062                            | 3091                            |
| AGO  | 2016 | country | 1_Afr   | Angola      | 35974 | 62496  | 98470  | 0.0297773 | 0.0517304 | 0.0815077 | 1208103    | 2069                          | 907                             | 2977                            |
| AGO  | 2017 | country | 1_Afr   | Angola      | 35717 | 60968  | 96685  | 0.0290027 | 0.0495069 | 0.0785096 | 1231507    | 2068                          | 836                             | 2904                            |
| AGO  | 2018 | country | 1_Afr   | Angola      | 35489 | 59850  | 95339  | 0.0282521 | 0.0476456 | 0.0758977 | 1256154    | 2098                          | 1068                            | 3166                            |
| AGO  | 2019 | country | 1_Afr   | Angola      | 35358 | 56999  | 92357  | 0.0275735 | 0.0444498 | 0.0720233 | 1282319    | 2133                          | 1093                            | 3226                            |

| iso3 | year | level   | whoreg6 | whoname | nnd | pnd | u5d  | nmr       | pnmr      | u5mr      | Livebirths | Neonatal birth defects deaths | 1-59 month birth defects deaths | Under five birth defects deaths |
|------|------|---------|---------|---------|-----|-----|------|-----------|-----------|-----------|------------|-------------------------------|---------------------------------|---------------------------------|
| ALB  | 2000 | country | 4_Eur   | Albania | 625 | 823 | 1448 | 0.0121939 | 0.016057  | 0.0282509 | 51255      | 111                           | 158                             | 269                             |
| ALB  | 2001 | country | 4_Eur   | Albania | 574 | 726 | 1300 | 0.0118344 | 0.0149683 | 0.0268027 | 48503      | 104                           | 145                             | 249                             |
| ALB  | 2002 | country | 4_Eur   | Albania | 526 | 637 | 1163 | 0.0114477 | 0.0138634 | 0.0253111 | 45948      | 101                           | 132                             | 233                             |
| ALB  | 2003 | country | 4_Eur   | Albania | 485 | 552 | 1037 | 0.0111223 | 0.0126587 | 0.023781  | 43606      | 97                            | 119                             | 216                             |
| ALB  | 2004 | country | 4_Eur   | Albania | 451 | 468 | 919  | 0.0109011 | 0.011312  | 0.0222132 | 41372      | 92                            | 104                             | 197                             |
| ALB  | 2005 | country | 4_Eur   | Albania | 416 | 398 | 814  | 0.0105506 | 0.0100941 | 0.0206447 | 39429      | 92                            | 92                              | 185                             |
| ALB  | 2006 | country | 4_Eur   | Albania | 377 | 345 | 722  | 0.0099582 | 0.0091129 | 0.0190712 | 37858      | 85                            | 83                              | 168                             |
| ALB  | 2007 | country | 4_Eur   | Albania | 337 | 306 | 643  | 0.0091761 | 0.008332  | 0.0175081 | 36726      | 80                            | 76                              | 156                             |
| ALB  | 2008 | country | 4_Eur   | Albania | 298 | 278 | 576  | 0.0082645 | 0.0077098 | 0.0159743 | 36058      | 72                            | 71                              | 144                             |
| ALB  | 2009 | country | 4_Eur   | Albania | 263 | 257 | 520  | 0.0073888 | 0.0072202 | 0.014609  | 35594      | 66                            | 69                              | 136                             |
| ALB  | 2010 | country | 4_Eur   | Albania | 237 | 235 | 472  | 0.0066587 | 0.0066025 | 0.0132612 | 35593      | 61                            | 66                              | 126                             |
| ALB  | 2011 | country | 4_Eur   | Albania | 222 | 210 | 432  | 0.0062332 | 0.0058963 | 0.0121295 | 35616      | 57                            | 61                              | 118                             |
| ALB  | 2012 | country | 4_Eur   | Albania | 214 | 184 | 398  | 0.0060018 | 0.0051604 | 0.0111622 | 35656      | 56                            | 55                              | 111                             |
| ALB  | 2013 | country | 4_Eur   | Albania | 211 | 161 | 372  | 0.0058949 | 0.004498  | 0.0103929 | 35794      | 55                            | 49                              | 104                             |
| ALB  | 2014 | country | 4_Eur   | Albania | 210 | 142 | 352  | 0.0059063 | 0.0039938 | 0.0099    | 35556      | 55                            | 44                              | 99                              |
| ALB  | 2015 | country | 4_Eur   | Albania | 213 | 126 | 339  | 0.0060327 | 0.0035687 | 0.0096014 | 35307      | 57                            | 40                              | 97                              |
| ALB  | 2016 | country | 4_Eur   | Albania | 221 | 110 | 331  | 0.0063319 | 0.0031516 | 0.0094835 | 34903      | 59                            | 35                              | 94                              |
| ALB  | 2017 | country | 4_Eur   | Albania | 232 | 95  | 327  | 0.006746  | 0.0027624 | 0.0095084 | 34391      | 61                            | 31                              | 92                              |
| ALB  | 2018 | country | 4_Eur   | Albania | 243 | 83  | 326  | 0.0071481 | 0.0024415 | 0.0095896 | 33995      | 65                            | 27                              | 91                              |
| ALB  | 2019 | country | 4_Eur   | Albania | 251 | 76  | 327  | 0.007518  | 0.0022764 | 0.0097944 | 33386      | 67                            | 25                              | 92                              |
| AND  | 2000 | country | 4_Eur   | Andorra | 3   | 2   | 5    | 0.0039048 | 0.0026032 | 0.006508  | 768        | 0                             | 2                               | 2                               |
| AND  | 2001 | country | 4_Eur   | Andorra | 3   | 2   | 5    | 0.0036831 | 0.0024554 | 0.0061385 | 815        | 0                             | 2                               | 2                               |
| AND  | 2002 | country | 4_Eur   | Andorra | 3   | 2   | 5    | 0.0034492 | 0.0022995 | 0.0057487 | 870        | 0                             | 2                               | 2                               |
| AND  | 2003 | country | 4_Eur   | Andorra | 3   | 2   | 5    | 0.0032574 | 0.0021716 | 0.005429  | 921        | 0                             | 2                               | 2                               |
| AND  | 2004 | country | 4_Eur   | Andorra | 2   | 3   | 5    | 0.0030787 | 0.0046181 | 0.0076968 | 650        | 0                             | 3                               | 3                               |
| AND  | 2005 | country | 4_Eur   | Andorra | 2   | 3   | 5    | 0.0029133 | 0.00437   | 0.0072834 | 686        | 0                             | 3                               | 3                               |
| AND  | 2006 | country | 4_Eur   | Andorra | 2   | 3   | 5    | 0.0027405 | 0.0041107 | 0.0068512 | 730        | 0                             | 3                               | 3                               |
| AND  | 2007 | country | 4_Eur   | Andorra | 2   | 2   | 4    | 0.0025785 | 0.0025785 | 0.0051569 | 776        | 0                             | 2                               | 2                               |
| AND  | 2008 | country | 4_Eur   | Andorra | 2   | 2   | 4    | 0.0024253 | 0.0024253 | 0.0048506 | 825        | 0                             | 2                               | 2                               |
| AND  | 2009 | country | 4_Eur   | Andorra | 2   | 2   | 4    | 0.0022994 | 0.0022994 | 0.0045988 | 870        | 0                             | 2                               | 2                               |
| AND  | 2010 | country | 4_Eur   | Andorra | 2   | 2   | 4    | 0.0021873 | 0.0021873 | 0.0043746 | 914        | 0                             | 2                               | 2                               |
| AND  | 2011 | country | 4_Eur   | Andorra | 2   | 1   | 3    | 0.0020819 | 0.001041  | 0.0031229 | 961        | 0                             | 1                               | 1                               |
| AND  | 2012 | country | 4_Eur   | Andorra | 1   | 2   | 3    | 0.0019825 | 0.0039651 | 0.0059476 | 504        | 0                             | 2                               | 2                               |
| AND  | 2013 | country | 4_Eur   | Andorra | 1   | 2   | 3    | 0.0018928 | 0.0037857 | 0.0056785 | 528        | 0                             | 0                               | 0                               |
| AND  | 2014 | country | 4_Eur   | Andorra | 1   | 2   | 3    | 0.0018049 | 0.0036097 | 0.0054146 | 554        | 0                             | 0                               | 0                               |
| AND  | 2015 | country | 4_Eur   | Andorra | 1   | 1   | 2    | 0.0017104 | 0.0017104 | 0.0034208 | 585        | 0                             | 0                               | 0                               |
| AND  | 2016 | country | 4_Eur   | Andorra | 1   | 1   | 2    | 0.0016253 | 0.0016253 | 0.0032506 | 615        | 0                             | 0                               | 0                               |
| AND  | 2017 | country | 4_Eur   | Andorra | 1   | 1   | 2    | 0.0015555 | 0.0015555 | 0.0031109 | 643        | 0                             | 0                               | 0                               |
| AND  | 2018 | country | 4_Eur   | Andorra | 1   | 1   | 2    | 0.0014806 | 0.0014806 | 0.0029612 | 675        | 0                             | 0                               | 0                               |
| AND  | 2019 | country | 4_Eur   | Andorra | 1   | 1   | 2    | 0.0014254 | 0.0014254 | 0.0028507 | 702        | 0                             | 0                               | 0                               |

| iso3 | year | level   | whoreg6 | whoname            | nnd  | pnd  | u5d   | nmr       | pnmr      | u5mr      | Livebirths | Neonatal birth defects deaths | 1-59 month birth defects deaths | Under five birth defects deaths |
|------|------|---------|---------|--------------------|------|------|-------|-----------|-----------|-----------|------------|-------------------------------|---------------------------------|---------------------------------|
| ARE  | 2000 | country | 5_Emr   | United Arab Emirat | 313  | 266  | 579   | 0.0059167 | 0.0050283 | 0.010945  | 52901      | 78                            | 101                             | 178                             |
| ARE  | 2001 | country | 5_Emr   | United Arab Emirat | 319  | 265  | 584   | 0.0057665 | 0.0047904 | 0.0105569 | 55320      | 81                            | 101                             | 182                             |
| ARE  | 2002 | country | 5_Emr   | United Arab Emirat | 328  | 267  | 595   | 0.0056202 | 0.004575  | 0.0101951 | 58361      | 83                            | 102                             | 185                             |
| ARE  | 2003 | country | 5_Emr   | United Arab Emirat | 340  | 272  | 612   | 0.0054736 | 0.0043789 | 0.0098525 | 62116      | 85                            | 105                             | 190                             |
| ARE  | 2004 | country | 5_Emr   | United Arab Emirat | 353  | 279  | 632   | 0.0053218 | 0.0042062 | 0.009528  | 66330      | 90                            | 108                             | 198                             |
| ARE  | 2005 | country | 5_Emr   | United Arab Emirat | 368  | 287  | 655   | 0.0051797 | 0.0040396 | 0.0092192 | 71047      | 96                            | 112                             | 208                             |
| ARE  | 2006 | country | 5_Emr   | United Arab Emirat | 382  | 297  | 679   | 0.0050335 | 0.0039135 | 0.0089469 | 75892      | 100                           | 116                             | 216                             |
| ARE  | 2007 | country | 5_Emr   | United Arab Emirat | 397  | 308  | 705   | 0.0049057 | 0.0038059 | 0.0087116 | 80927      | 107                           | 122                             | 228                             |
| ARE  | 2008 | country | 5_Emr   | United Arab Emirat | 410  | 319  | 729   | 0.0047787 | 0.003718  | 0.0084967 | 85798      | 112                           | 127                             | 240                             |
| ARE  | 2009 | country | 5_Emr   | United Arab Emirat | 420  | 330  | 750   | 0.004657  | 0.0036591 | 0.0083161 | 90186      | 117                           | 134                             | 250                             |
| ARE  | 2010 | country | 5_Emr   | United Arab Emirat | 427  | 340  | 767   | 0.0045387 | 0.0036139 | 0.0081526 | 94080      | 121                           | 140                             | 260                             |
| ARE  | 2011 | country | 5_Emr   | United Arab Emirat | 431  | 349  | 780   | 0.0044461 | 0.0036002 | 0.0080464 | 96938      | 121                           | 144                             | 266                             |
| ARE  | 2012 | country | 5_Emr   | United Arab Emirat | 433  | 355  | 788   | 0.0043689 | 0.0035819 | 0.0079508 | 99109      | 123                           | 147                             | 270                             |
| ARE  | 2013 | country | 5_Emr   | United Arab Emirat | 433  | 359  | 792   | 0.0043062 | 0.0035703 | 0.0078765 | 100552     | 124                           | 149                             | 272                             |
| ARE  | 2014 | country | 5_Emr   | United Arab Emirat | 431  | 362  | 793   | 0.004252  | 0.0035713 | 0.0078232 | 101365     | 124                           | 149                             | 273                             |
| ARE  | 2015 | country | 5_Emr   | United Arab Emirat | 426  | 364  | 790   | 0.0042033 | 0.0035915 | 0.0077948 | 101350     | 124                           | 150                             | 274                             |
| ARE  | 2016 | country | 5_Emr   | United Arab Emirat | 420  | 364  | 784   | 0.0041574 | 0.0036031 | 0.0077604 | 101026     | 124                           | 150                             | 274                             |
| ARE  | 2017 | country | 5_Emr   | United Arab Emirat | 414  | 362  | 776   | 0.0041099 | 0.0035937 | 0.0077036 | 100732     | 120                           | 150                             | 270                             |
| ARE  | 2018 | country | 5_Emr   | United Arab Emirat | 406  | 358  | 764   | 0.0040505 | 0.0035716 | 0.007622  | 100236     | 119                           | 148                             | 268                             |
| ARE  | 2019 | country | 5_Emr   | United Arab Emirat | 398  | 352  | 750   | 0.0039789 | 0.003519  | 0.0074979 | 100028     | 117                           | 145                             | 261                             |
| ARG  | 2000 | country | 2_Amr   | Argentina          | 7865 | 6212 | 14077 | 0.0109346 | 0.0086365 | 0.0195711 | 719275     | 1783                          | 1565                            | 3348                            |
| ARG  | 2001 | country | 2_Amr   | Argentina          | 7913 | 5705 | 13618 | 0.0109789 | 0.0079154 | 0.0188943 | 720746     | 1871                          | 1522                            | 3394                            |
| ARG  | 2002 | country | 2_Amr   | Argentina          | 7799 | 5383 | 13182 | 0.0107922 | 0.0074489 | 0.0182411 | 722653     | 1807                          | 1280                            | 3087                            |
| ARG  | 2003 | country | 2_Amr   | Argentina          | 7466 | 5285 | 12751 | 0.0103032 | 0.0072934 | 0.0175967 | 724626     | 1747                          | 1234                            | 2981                            |
| ARG  | 2004 | country | 2_Amr   | Argentina          | 7050 | 5297 | 12347 | 0.0097049 | 0.0072917 | 0.0169966 | 726438     | 1744                          | 1413                            | 3157                            |
| ARG  | 2005 | country | 2_Amr   | Argentina          | 6685 | 5312 | 11997 | 0.0091775 | 0.0072926 | 0.0164701 | 728409     | 1656                          | 1479                            | 3135                            |
| ARG  | 2006 | country | 2_Amr   | Argentina          | 6392 | 5310 | 11702 | 0.0087491 | 0.0072681 | 0.0160172 | 730587     | 1728                          | 1467                            | 3195                            |
| ARG  | 2007 | country | 2_Amr   | Argentina          | 6138 | 5315 | 11453 | 0.0083725 | 0.0072499 | 0.0156223 | 733117     | 1566                          | 1333                            | 2900                            |
| ARG  | 2008 | country | 2_Amr   | Argentina          | 5915 | 5315 | 11230 | 0.0080357 | 0.0072206 | 0.0152563 | 736089     | 1552                          | 1522                            | 3074                            |
| ARG  | 2009 | country | 2_Amr   | Argentina          | 5758 | 5226 | 10984 | 0.0077867 | 0.0070672 | 0.0148539 | 739468     | 1597                          | 1440                            | 3037                            |
| ARG  | 2010 | country | 2_Amr   | Argentina          | 5689 | 4990 | 10679 | 0.0076556 | 0.006715  | 0.0143706 | 743114     | 1574                          | 1414                            | 2988                            |
| ARG  | 2011 | country | 2_Amr   | Argentina          | 5658 | 4652 | 10310 | 0.0075772 | 0.00623   | 0.0138073 | 746709     | 1575                          | 1256                            | 2831                            |
| ARG  | 2012 | country | 2_Amr   | Argentina          | 5588 | 4319 | 9907  | 0.0074517 | 0.0057595 | 0.0132112 | 749895     | 1605                          | 1279                            | 2884                            |
| ARG  | 2013 | country | 2_Amr   | Argentina          | 5439 | 4051 | 9490  | 0.0072278 | 0.0053833 | 0.012611  | 752516     | 1457                          | 1246                            | 2703                            |
| ARG  | 2014 | country | 2_Amr   | Argentina          | 5239 | 3825 | 9064  | 0.0069442 | 0.00507   | 0.0120141 | 754444     | 1514                          | 1201                            | 2715                            |
| ARG  | 2015 | country | 2_Amr   | Argentina          | 5020 | 3620 | 8640  | 0.0066434 | 0.0047907 | 0.0114341 | 755635     | 1435                          | 1149                            | 2584                            |
| ARG  | 2016 | country | 2_Amr   | Argentina          | 4826 | 3391 | 8217  | 0.0063839 | 0.0044857 | 0.0108695 | 755966     | 1377                          | 1000                            | 2377                            |
| ARG  | 2017 | country | 2_Amr   | Argentina          | 4706 | 3086 | 7792  | 0.0062281 | 0.0040841 | 0.0103122 | 755609     | 1349                          | 953                             | 2302                            |
| ARG  | 2018 | country | 2_Amr   | Argentina          | 4650 | 2723 | 7373  | 0.006161  | 0.0036078 | 0.0097688 | 754752     | 1330                          | 841                             | 2170                            |
| ARG  | 2019 | country | 2_Amr   | Argentina          | 4583 | 2394 | 6977  | 0.0060816 | 0.0031768 | 0.0092584 | 753583     | 1311                          | 739                             | 2050                            |

| iso3 | year | level   | whoreg6 | whoname            | nnd | pnd | u5d  | nmr       | pnmr      | u5mr      | Livebirths | Neonatal birth defects deaths | 1-59 month birth defects deaths | Under five birth defects deaths |
|------|------|---------|---------|--------------------|-----|-----|------|-----------|-----------|-----------|------------|-------------------------------|---------------------------------|---------------------------------|
| ARM  | 2000 | country | 4_Eur   | Armenia            | 651 | 590 | 1241 | 0.0164448 | 0.0149039 | 0.0313487 | 39587      | 90                            | 107                             | 196                             |
| ARM  | 2001 | country | 4_Eur   | Armenia            | 626 | 535 | 1161 | 0.0158569 | 0.0135518 | 0.0294087 | 39478      | 90                            | 99                              | 189                             |
| ARM  | 2002 | country | 4_Eur   | Armenia            | 602 | 501 | 1103 | 0.0151027 | 0.0125689 | 0.0276716 | 39860      | 91                            | 93                              | 184                             |
| ARM  | 2003 | country | 4_Eur   | Armenia            | 582 | 478 | 1060 | 0.0143532 | 0.0117884 | 0.0261416 | 40548      | 94                            | 92                              | 186                             |
| ARM  | 2004 | country | 4_Eur   | Armenia            | 565 | 459 | 1024 | 0.0136461 | 0.011086  | 0.0247321 | 41404      | 96                            | 91                              | 187                             |
| ARM  | 2005 | country | 4_Eur   | Armenia            | 548 | 444 | 992  | 0.0129846 | 0.0105203 | 0.0235049 | 42204      | 99                            | 91                              | 190                             |
| ARM  | 2006 | country | 4_Eur   | Armenia            | 530 | 430 | 960  | 0.0123288 | 0.0100026 | 0.0223314 | 42989      | 102                           | 91                              | 193                             |
| ARM  | 2007 | country | 4_Eur   | Armenia            | 511 | 416 | 927  | 0.0117331 | 0.0095518 | 0.0212849 | 43552      | 104                           | 91                              | 195                             |
| ARM  | 2008 | country | 4_Eur   | Armenia            | 492 | 401 | 893  | 0.0111742 | 0.0091075 | 0.0202817 | 44030      | 104                           | 90                              | 194                             |
| ARM  | 2009 | country | 4_Eur   | Armenia            | 471 | 385 | 856  | 0.0106228 | 0.0086832 | 0.019306  | 44339      | 105                           | 89                              | 194                             |
| ARM  | 2010 | country | 4_Eur   | Armenia            | 449 | 369 | 818  | 0.0100916 | 0.0082935 | 0.0183851 | 44493      | 106                           | 88                              | 194                             |
| ARM  | 2011 | country | 4_Eur   | Armenia            | 426 | 353 | 779  | 0.0095984 | 0.0079536 | 0.0175519 | 44383      | 101                           | 88                              | 188                             |
| ARM  | 2012 | country | 4_Eur   | Armenia            | 403 | 336 | 739  | 0.009107  | 0.0075929 | 0.0166999 | 44252      | 98                            | 85                              | 184                             |
| ARM  | 2013 | country | 4_Eur   | Armenia            | 380 | 319 | 699  | 0.0086504 | 0.0072618 | 0.0159122 | 43929      | 94                            | 83                              | 177                             |
| ARM  | 2014 | country | 4_Eur   | Armenia            | 358 | 303 | 661  | 0.0082131 | 0.0069513 | 0.0151644 | 43589      | 88                            | 81                              | 168                             |
| ARM  | 2015 | country | 4_Eur   | Armenia            | 338 | 286 | 624  | 0.0078206 | 0.0066175 | 0.0144381 | 43219      | 85                            | 78                              | 163                             |
| ARM  | 2016 | country | 4_Eur   | Armenia            | 317 | 270 | 587  | 0.007438  | 0.0063352 | 0.0137732 | 42619      | 79                            | 75                              | 154                             |
| ARM  | 2017 | country | 4_Eur   | Armenia            | 297 | 254 | 551  | 0.0070622 | 0.0060397 | 0.0131019 | 42055      | 74                            | 72                              | 146                             |
| ARM  | 2018 | country | 4_Eur   | Armenia            | 277 | 238 | 515  | 0.0067185 | 0.0057726 | 0.0124911 | 41229      | 71                            | 69                              | 140                             |
| ARM  | 2019 | country | 4_Eur   | Armenia            | 258 | 224 | 482  | 0.0064044 | 0.0055604 | 0.0119648 | 40285      | 66                            | 66                              | 132                             |
| ATG  | 2000 | country | 2_Amr   | Antigua and Barbud | 14  | 9   | 23   | 0.0096292 | 0.0061902 | 0.0158194 | 1454       | 4                             | 1                               | 5                               |
| ATG  | 2001 | country | 2_Amr   | Antigua and Barbud | 14  | 8   | 22   | 0.0094385 | 0.0053935 | 0.014832  | 1483       | 2                             | 3                               | 4                               |
| ATG  | 2002 | country | 2_Amr   | Antigua and Barbud | 14  | 8   | 22   | 0.0091932 | 0.0052533 | 0.0144464 | 1523       | 1                             | 0                               | 1                               |
| ATG  | 2003 | country | 2_Amr   | Antigua and Barbud | 13  | 8   | 21   | 0.0088927 | 0.0054724 | 0.0143651 | 1462       | 13                            | 6                               | 19                              |
| ATG  | 2004 | country | 2_Amr   | Antigua and Barbud | 13  | 7   | 20   | 0.0085436 | 0.0046004 | 0.0131144 | 1522       | 2                             | 0                               | 2                               |
| ATG  | 2005 | country | 2_Amr   | Antigua and Barbud | 12  | 7   | 19   | 0.0081375 | 0.0047469 | 0.0128844 | 1475       | 5                             | 1                               | 6                               |
| ATG  | 2006 | country | 2_Amr   | Antigua and Barbud | 11  | 7   | 18   | 0.007685  | 0.0048905 | 0.0125755 | 1431       | 0                             | 1                               | 1                               |
| ATG  | 2007 | country | 2_Amr   | Antigua and Barbud | 11  | 6   | 17   | 0.0072227 | 0.0039397 | 0.0111624 | 1523       | 3                             | 1                               | 4                               |
| ATG  | 2008 | country | 2_Amr   | Antigua and Barbud | 10  | 6   | 16   | 0.0067482 | 0.0040489 | 0.0107972 | 1482       | 2                             | 0                               | 2                               |
| ATG  | 2009 | country | 2_Amr   | Antigua and Barbud | 9   | 6   | 15   | 0.0062949 | 0.0041966 | 0.0104916 | 1430       | 0                             | 1                               | 1                               |
| ATG  | 2010 | country | 2_Amr   | Antigua and Barbud | 9   | 6   | 15   | 0.0058553 | 0.0039035 | 0.0097588 | 1537       | 2                             | 1                               | 3                               |
| ATG  | 2011 | country | 2_Amr   | Antigua and Barbud | 8   | 6   | 14   | 0.0054544 | 0.0040908 | 0.0095452 | 1467       | 2                             | 1                               | 3                               |
| ATG  | 2012 | country | 2_Amr   | Antigua and Barbud | 7   | 6   | 13   | 0.0050826 | 0.0043565 | 0.0094392 | 1377       | 2                             | 1                               | 3                               |
| ATG  | 2013 | country | 2_Amr   | Antigua and Barbud | 7   | 6   | 13   | 0.0047594 | 0.0040795 | 0.0088389 | 1471       | 2                             | 1                               | 3                               |
| ATG  | 2014 | country | 2_Amr   | Antigua and Barbud | 7   | 5   | 12   | 0.0044915 | 0.0032082 | 0.0076997 | 1559       | 4                             | 1                               | 4                               |
| ATG  | 2015 | country | 2_Amr   | Antigua and Barbud | 6   | 5   | 11   | 0.0042682 | 0.0035568 | 0.007825  | 1406       | 2                             | 3                               | 6                               |
| ATG  | 2016 | country | 2_Amr   | Antigua and Barbud | 6   | 5   | 11   | 0.0040861 | 0.0034051 | 0.0074912 | 1468       | 2                             | 0                               | 2                               |
| ATG  | 2017 | country | 2_Amr   | Antigua and Barbud | 6   | 5   | 11   | 0.0039186 | 0.0032655 | 0.0071841 | 1531       | 2                             | 1                               | 4                               |
| ATG  | 2018 | country | 2_Amr   | Antigua and Barbud | 6   | 4   | 10   | 0.0037643 | 0.0025095 | 0.0062738 | 1594       | 2                             | 1                               | 3                               |
| ATG  | 2019 | country | 2_Amr   | Antigua and Barbud | 5   | 5   | 10   | 0.0036323 | 0.0036323 | 0.0072646 | 1377       | 2                             | 1                               | 3                               |

| iso3 | year | level   | whoreg6 | whoname   | nnd | pnd | u5d  | nmr       | pnmr      | u5mr      | Livebirths | Neonatal birth defects deaths | 1-59 month birth defects deaths | Under five birth defects deaths |
|------|------|---------|---------|-----------|-----|-----|------|-----------|-----------|-----------|------------|-------------------------------|---------------------------------|---------------------------------|
| AUS  | 2000 | country | 6_Wpr   | Australia | 870 | 662 | 1532 | 0.0035252 | 0.0026824 | 0.0062075 | 246797     | 268                           | 163                             | 432                             |
| AUS  | 2001 | country | 6_Wpr   | Australia | 865 | 639 | 1504 | 0.0034875 | 0.0025763 | 0.0060638 | 248028     | 269                           | 135                             | 404                             |
| AUS  | 2002 | country | 6_Wpr   | Australia | 863 | 628 | 1491 | 0.0034379 | 0.0025018 | 0.0059397 | 251022     | 230                           | 151                             | 381                             |
| AUS  | 2003 | country | 6_Wpr   | Australia | 864 | 628 | 1492 | 0.0033752 | 0.0024533 | 0.0058286 | 255981     | 253                           | 134                             | 387                             |
| AUS  | 2004 | country | 6_Wpr   | Australia | 867 | 635 | 1502 | 0.0033021 | 0.0024185 | 0.0057206 | 262558     | 275                           | 119                             | 394                             |
| AUS  | 2005 | country | 6_Wpr   | Australia | 871 | 640 | 1511 | 0.0032258 | 0.0023703 | 0.0055961 | 270012     | 262                           | 147                             | 409                             |
| AUS  | 2006 | country | 6_Wpr   | Australia | 872 | 642 | 1514 | 0.0031359 | 0.0023087 | 0.0054446 | 278073     | 241                           | 114                             | 354                             |
| AUS  | 2007 | country | 6_Wpr   | Australia | 870 | 638 | 1508 | 0.003047  | 0.0022344 | 0.0052814 | 285530     | 283                           | 144                             | 427                             |
| AUS  | 2008 | country | 6_Wpr   | Australia | 861 | 631 | 1492 | 0.0029443 | 0.0021578 | 0.0051021 | 292428     | 282                           | 143                             | 425                             |
| AUS  | 2009 | country | 6_Wpr   | Australia | 846 | 617 | 1463 | 0.0028373 | 0.0020693 | 0.0049065 | 298176     | 254                           | 158                             | 412                             |
| AUS  | 2010 | country | 6_Wpr   | Australia | 825 | 596 | 1421 | 0.0027296 | 0.0019719 | 0.0047016 | 302241     | 261                           | 148                             | 409                             |
| AUS  | 2011 | country | 6_Wpr   | Australia | 800 | 571 | 1371 | 0.0026177 | 0.0018684 | 0.0044861 | 305607     | 226                           | 140                             | 366                             |
| AUS  | 2012 | country | 6_Wpr   | Australia | 777 | 543 | 1320 | 0.0025191 | 0.0017604 | 0.0042795 | 308449     | 249                           | 102                             | 351                             |
| AUS  | 2013 | country | 6_Wpr   | Australia | 759 | 515 | 1274 | 0.0024448 | 0.0016588 | 0.0041036 | 310461     | 234                           | 121                             | 354                             |
| AUS  | 2014 | country | 6_Wpr   | Australia | 746 | 490 | 1236 | 0.0023852 | 0.0015667 | 0.0039518 | 312767     | 208                           | 124                             | 332                             |
| AUS  | 2015 | country | 6_Wpr   | Australia | 739 | 469 | 1208 | 0.0023484 | 0.0014904 | 0.0038389 | 314676     | 225                           | 90                              | 314                             |
| AUS  | 2016 | country | 6_Wpr   | Australia | 735 | 454 | 1189 | 0.0023239 | 0.0014354 | 0.0037593 | 316283     | 221                           | 114                             | 336                             |
| AUS  | 2017 | country | 6_Wpr   | Australia | 734 | 441 | 1175 | 0.0023117 | 0.0013889 | 0.0037007 | 317509     | 216                           | 102                             | 319                             |
| AUS  | 2018 | country | 6_Wpr   | Australia | 732 | 430 | 1162 | 0.0022984 | 0.0013502 | 0.0036486 | 318480     | 219                           | 100                             | 319                             |
| AUS  | 2019 | country | 6_Wpr   | Australia | 726 | 420 | 1146 | 0.0022773 | 0.0013175 | 0.0035948 | 318792     | 217                           | 98                              | 314                             |
| AUT  | 2000 | country | 4_Eur   | Austria   | 248 | 201 | 449  | 0.0030867 | 0.0025017 | 0.0055883 | 80346      | 92                            | 78                              | 171                             |
| AUT  | 2001 | country | 4_Eur   | Austria   | 244 | 192 | 436  | 0.003074  | 0.0024189 | 0.0054929 | 79375      | 81                            | 69                              | 149                             |
| AUT  | 2002 | country | 4_Eur   | Austria   | 239 | 184 | 423  | 0.0030472 | 0.002346  | 0.0053931 | 78433      | 63                            | 59                              | 122                             |
| AUT  | 2003 | country | 4_Eur   | Austria   | 234 | 175 | 409  | 0.0029991 | 0.0022429 | 0.005242  | 78023      | 53                            | 63                              | 116                             |
| AUT  | 2004 | country | 4_Eur   | Austria   | 227 | 167 | 394  | 0.0029269 | 0.0021533 | 0.0050802 | 77556      | 59                            | 54                              | 114                             |
| AUT  | 2005 | country | 4_Eur   | Austria   | 219 | 160 | 379  | 0.0028387 | 0.0020739 | 0.0049126 | 77148      | 63                            | 52                              | 115                             |
| AUT  | 2006 | country | 4_Eur   | Austria   | 212 | 155 | 367  | 0.0027529 | 0.0020127 | 0.0047656 | 77010      | 47                            | 43                              | 90                              |
| AUT  | 2007 | country | 4_Eur   | Austria   | 207 | 151 | 358  | 0.0026781 | 0.0019536 | 0.0046318 | 77293      | 51                            | 48                              | 98                              |
| AUT  | 2008 | country | 4_Eur   | Austria   | 202 | 149 | 351  | 0.0026148 | 0.0019287 | 0.0045435 | 77254      | 66                            | 48                              | 114                             |
| AUT  | 2009 | country | 4_Eur   | Austria   | 199 | 146 | 345  | 0.0025594 | 0.0018777 | 0.0044371 | 77753      | 64                            | 50                              | 113                             |
| AUT  | 2010 | country | 4_Eur   | Austria   | 197 | 141 | 338  | 0.0025066 | 0.0017941 | 0.0043007 | 78592      | 55                            | 54                              | 108                             |
| AUT  | 2011 | country | 4_Eur   | Austria   | 194 | 137 | 331  | 0.0024541 | 0.0017331 | 0.0041872 | 79051      | 73                            | 47                              | 120                             |
| AUT  | 2012 | country | 4_Eur   | Austria   | 192 | 130 | 322  | 0.0023966 | 0.0016227 | 0.0040193 | 80114      | 67                            | 40                              | 107                             |
| AUT  | 2013 | country | 4_Eur   | Austria   | 191 | 123 | 314  | 0.0023405 | 0.0015073 | 0.0038478 | 81605      | 73                            | 42                              | 115                             |
| AUT  | 2014 | country | 4_Eur   | Austria   | 190 | 120 | 310  | 0.00229   | 0.0014463 | 0.0037363 | 82970      | 64                            | 41                              | 105                             |
| AUT  | 2015 | country | 4_Eur   | Austria   | 189 | 119 | 308  | 0.0022454 | 0.0014138 | 0.0036592 | 84172      | 62                            | 44                              | 106                             |
| AUT  | 2016 | country | 4_Eur   | Austria   | 189 | 119 | 308  | 0.0022014 | 0.0013861 | 0.0035875 | 85854      | 74                            | 46                              | 120                             |
| AUT  | 2017 | country | 4_Eur   | Austria   | 188 | 120 | 308  | 0.0021579 | 0.0013774 | 0.0035353 | 87122      | 51                            | 38                              | 89                              |
| AUT  | 2018 | country | 4_Eur   | Austria   | 186 | 122 | 308  | 0.0021086 | 0.0013831 | 0.0034917 | 88210      | 61                            | 43                              | 105                             |
| AUT  | 2019 | country | 4_Eur   | Austria   | 184 | 122 | 306  | 0.0020628 | 0.0013677 | 0.0034305 | 89201      | 61                            | 43                              | 104                             |

| iso3 | year | level   | whoreg6 | whoname    | nnd   | pnd   | u5d   | nmr       | pnmr      | u5mr      | Livebirths | Neonatal birth defects deaths | 1-59 month birth defects deaths | Under five birth defects deaths |
|------|------|---------|---------|------------|-------|-------|-------|-----------|-----------|-----------|------------|-------------------------------|---------------------------------|---------------------------------|
| AZE  | 2000 | country | 4_Eur   | Azerbaijan | 4716  | 6051  | 10767 | 0.0334714 | 0.0429465 | 0.0764179 | 140896     | 455                           | 274                             | 728                             |
| AZE  | 2001 | country | 4_Eur   | Azerbaijan | 4424  | 5316  | 9740  | 0.0320729 | 0.0385397 | 0.0706127 | 137936     | 442                           | 267                             | 710                             |
| AZE  | 2002 | country | 4_Eur   | Azerbaijan | 4178  | 4693  | 8871  | 0.0306607 | 0.0344401 | 0.0651008 | 136266     | 431                           | 243                             | 673                             |
| AZE  | 2003 | country | 4_Eur   | Azerbaijan | 3963  | 4181  | 8144  | 0.0292131 | 0.03082   | 0.0600331 | 135659     | 406                           | 237                             | 644                             |
| AZE  | 2004 | country | 4_Eur   | Azerbaijan | 3781  | 3785  | 7566  | 0.0277643 | 0.0277937 | 0.055558  | 136182     | 393                           | 229                             | 622                             |
| AZE  | 2005 | country | 4_Eur   | Azerbaijan | 3633  | 3468  | 7101  | 0.0263492 | 0.0251525 | 0.0515017 | 137879     | 391                           | 222                             | 613                             |
| AZE  | 2006 | country | 4_Eur   | Azerbaijan | 3524  | 3229  | 6753  | 0.02499   | 0.0228981 | 0.0478881 | 141016     | 387                           | 229                             | 615                             |
| AZE  | 2007 | country | 4_Eur   | Azerbaijan | 3445  | 3038  | 6483  | 0.0236666 | 0.0208706 | 0.0445371 | 145564     | 378                           | 260                             | 639                             |
| AZE  | 2008 | country | 4_Eur   | Azerbaijan | 3388  | 2886  | 6274  | 0.0224047 | 0.019085  | 0.0414897 | 151218     | 376                           | 282                             | 658                             |
| AZE  | 2009 | country | 4_Eur   | Azerbaijan | 3335  | 2759  | 6094  | 0.0211754 | 0.0175181 | 0.0386935 | 157494     | 379                           | 321                             | 700                             |
| AZE  | 2010 | country | 4_Eur   | Azerbaijan | 3268  | 2651  | 5919  | 0.0199404 | 0.0161757 | 0.0361161 | 163888     | 375                           | 351                             | 727                             |
| AZE  | 2011 | country | 4_Eur   | Azerbaijan | 3179  | 2564  | 5743  | 0.0187384 | 0.0151134 | 0.0338518 | 169651     | 390                           | 380                             | 770                             |
| AZE  | 2012 | country | 4_Eur   | Azerbaijan | 3070  | 2458  | 5528  | 0.0176166 | 0.0141048 | 0.0317214 | 174267     | 409                           | 402                             | 811                             |
| AZE  | 2013 | country | 4_Eur   | Azerbaijan | 2937  | 2338  | 5275  | 0.0165643 | 0.013186  | 0.0297503 | 177309     | 425                           | 420                             | 844                             |
| AZE  | 2014 | country | 4_Eur   | Azerbaijan | 2755  | 2232  | 4987  | 0.0154297 | 0.0125006 | 0.0279303 | 178551     | 425                           | 421                             | 846                             |
| AZE  | 2015 | country | 4_Eur   | Azerbaijan | 2533  | 2126  | 4659  | 0.0142428 | 0.0119543 | 0.0261971 | 177844     | 427                           | 413                             | 839                             |
| AZE  | 2016 | country | 4_Eur   | Azerbaijan | 2316  | 2002  | 4318  | 0.0132021 | 0.0114121 | 0.0246142 | 175427     | 412                           | 402                             | 814                             |
| AZE  | 2017 | country | 4_Eur   | Azerbaijan | 2102  | 1877  | 3979  | 0.0122488 | 0.0109377 | 0.0231865 | 171608     | 409                           | 391                             | 800                             |
| AZE  | 2018 | country | 4_Eur   | Azerbaijan | 1925  | 1735  | 3660  | 0.0115197 | 0.0103827 | 0.0219025 | 167105     | 384                           | 374                             | 758                             |
| AZE  | 2019 | country | 4_Eur   | Azerbaijan | 1765  | 1605  | 3370  | 0.0108918 | 0.0099045 | 0.0207963 | 162048     | 366                           | 357                             | 723                             |
| BDI  | 2000 | country | 1_Afr   | Burundi    | 10270 | 33362 | 43632 | 0.0369089 | 0.1198973 | 0.1568062 | 278253     | 392                           | 87                              | 479                             |
| BDI  | 2001 | country | 1_Afr   | Burundi    | 10279 | 32750 | 43029 | 0.0362416 | 0.1154686 | 0.1517102 | 283624     | 402                           | 101                             | 504                             |
| BDI  | 2002 | country | 1_Afr   | Burundi    | 10317 | 29708 | 40025 | 0.0355243 | 0.1022922 | 0.1378165 | 290421     | 427                           | 206                             | 632                             |
| BDI  | 2003 | country | 1_Afr   | Burundi    | 10379 | 28709 | 39088 | 0.0347754 | 0.096192  | 0.1309674 | 298458     | 456                           | 173                             | 629                             |
| BDI  | 2004 | country | 1_Afr   | Burundi    | 10454 | 27889 | 38343 | 0.0339891 | 0.0906769 | 0.124666  | 307569     | 492                           | 234                             | 725                             |
| BDI  | 2005 | country | 1_Afr   | Burundi    | 10490 | 26946 | 37436 | 0.0330302 | 0.084846  | 0.1178762 | 317588     | 520                           | 554                             | 1074                            |
| BDI  | 2006 | country | 1_Afr   | Burundi    | 10527 | 25923 | 36450 | 0.0320653 | 0.0789629 | 0.1110282 | 328299     | 554                           | 479                             | 1032                            |
| BDI  | 2007 | country | 1_Afr   | Burundi    | 10532 | 24662 | 35194 | 0.0310301 | 0.0726619 | 0.103692  | 339413     | 581                           | 484                             | 1064                            |
| BDI  | 2008 | country | 1_Afr   | Burundi    | 10510 | 23689 | 34199 | 0.0299696 | 0.0675488 | 0.0975184 | 350689     | 612                           | 471                             | 1083                            |
| BDI  | 2009 | country | 1_Afr   | Burundi    | 10449 | 22744 | 33193 | 0.0288822 | 0.0628664 | 0.0917485 | 361781     | 650                           | 594                             | 1245                            |
| BDI  | 2010 | country | 1_Afr   | Burundi    | 10354 | 21745 | 32099 | 0.0277991 | 0.0583834 | 0.0861825 | 372458     | 697                           | 655                             | 1352                            |
| BDI  | 2011 | country | 1_Afr   | Burundi    | 10249 | 20804 | 31053 | 0.0267932 | 0.0543874 | 0.0811806 | 382523     | 693                           | 744                             | 1437                            |
| BDI  | 2012 | country | 1_Afr   | Burundi    | 10126 | 19910 | 30036 | 0.0258384 | 0.0508051 | 0.0766435 | 391897     | 711                           | 876                             | 1587                            |
| BDI  | 2013 | country | 1_Afr   | Burundi    | 9975  | 18972 | 28947 | 0.0248986 | 0.0473572 | 0.0722559 | 400624     | 736                           | 1025                            | 1761                            |
| BDI  | 2014 | country | 1_Afr   | Burundi    | 9822  | 18164 | 27986 | 0.0240321 | 0.0444435 | 0.0684756 | 408704     | 757                           | 971                             | 1728                            |
| BDI  | 2015 | country | 1_Afr   | Burundi    | 9697  | 17412 | 27109 | 0.0232989 | 0.0418356 | 0.0651345 | 416200     | 760                           | 926                             | 1687                            |
| BDI  | 2016 | country | 1_Afr   | Burundi    | 9570  | 16786 | 26356 | 0.0226144 | 0.0396668 | 0.0622812 | 423182     | 764                           | 832                             | 1596                            |
| BDI  | 2017 | country | 1_Afr   | Burundi    | 9464  | 16232 | 25696 | 0.0220167 | 0.0377617 | 0.0597784 | 429855     | 774                           | 731                             | 1505                            |
| BDI  | 2018 | country | 1_Afr   | Burundi    | 9361  | 15630 | 24991 | 0.0214528 | 0.0358199 | 0.0572727 | 436353     | 782                           | 795                             | 1577                            |
| BDI  | 2019 | country | 1_Afr   | Burundi    | 9288  | 15126 | 24414 | 0.0209744 | 0.0341588 | 0.0551331 | 442826     | 790                           | 789                             | 1579                            |

| iso3 | year | level   | whoreg6 | whoname | nnd   | pnd   | u5d   | nmr       | pnmr      | u5mr      | Livebirths | Neonatal birth defects deaths | 1-59 month birth defects deaths | Under five birth defects deaths |
|------|------|---------|---------|---------|-------|-------|-------|-----------|-----------|-----------|------------|-------------------------------|---------------------------------|---------------------------------|
| BEL  | 2000 | country | 4_Eur   | Belgium | 336   | 327   | 663   | 0.0029463 | 0.0028674 | 0.0058137 | 114041     | 122                           | 82                              | 204                             |
| BEL  | 2001 | country | 4_Eur   | Belgium | 324   | 315   | 639   | 0.0028375 | 0.0027587 | 0.0055962 | 114185     | 108                           | 74                              | 181                             |
| BEL  | 2002 | country | 4_Eur   | Belgium | 318   | 301   | 619   | 0.002761  | 0.0026134 | 0.0053745 | 115174     | 114                           | 67                              | 181                             |
| BEL  | 2003 | country | 4_Eur   | Belgium | 315   | 289   | 604   | 0.0027027 | 0.0024797 | 0.0051824 | 116548     | 112                           | 63                              | 174                             |
| BEL  | 2004 | country | 4_Eur   | Belgium | 314   | 278   | 592   | 0.0026554 | 0.002351  | 0.0050064 | 118248     | 115                           | 76                              | 191                             |
| BEL  | 2005 | country | 4_Eur   | Belgium | 314   | 270   | 584   | 0.0026145 | 0.0022481 | 0.0048626 | 120100     | 92                            | 54                              | 146                             |
| BEL  | 2006 | country | 4_Eur   | Belgium | 314   | 266   | 580   | 0.0025738 | 0.0021804 | 0.0047542 | 121996     | 92                            | 68                              | 160                             |
| BEL  | 2007 | country | 4_Eur   | Belgium | 312   | 265   | 577   | 0.0025237 | 0.0021435 | 0.0046673 | 123627     | 98                            | 65                              | 163                             |
| BEL  | 2008 | country | 4_Eur   | Belgium | 308   | 266   | 574   | 0.0024615 | 0.0021258 | 0.0045873 | 125128     | 94                            | 71                              | 166                             |
| BEL  | 2009 | country | 4_Eur   | Belgium | 302   | 267   | 569   | 0.0023959 | 0.0021182 | 0.0045141 | 126051     | 91                            | 65                              | 157                             |
| BEL  | 2010 | country | 4_Eur   | Belgium | 297   | 266   | 563   | 0.0023398 | 0.0020956 | 0.0044354 | 126932     | 91                            | 70                              | 162                             |
| BEL  | 2011 | country | 4_Eur   | Belgium | 292   | 264   | 556   | 0.0022995 | 0.002079  | 0.0043785 | 126985     | 87                            | 62                              | 149                             |
| BEL  | 2012 | country | 4_Eur   | Belgium | 289   | 257   | 546   | 0.0022749 | 0.002023  | 0.0042979 | 127037     | 112                           | 66                              | 178                             |
| BEL  | 2013 | country | 4_Eur   | Belgium | 287   | 245   | 532   | 0.0022603 | 0.0019295 | 0.0041898 | 126974     | 95                            | 60                              | 155                             |
| BEL  | 2014 | country | 4_Eur   | Belgium | 284   | 231   | 515   | 0.0022462 | 0.001827  | 0.0040732 | 126437     | 81                            | 68                              | 149                             |
| BEL  | 2015 | country | 4_Eur   | Belgium | 280   | 217   | 497   | 0.0022224 | 0.0017224 | 0.0039448 | 125988     | 69                            | 39                              | 108                             |
| BEL  | 2016 | country | 4_Eur   | Belgium | 274   | 203   | 477   | 0.0021848 | 0.0016186 | 0.0038034 | 125414     | 76                            | 56                              | 132                             |
| BEL  | 2017 | country | 4_Eur   | Belgium | 267   | 191   | 458   | 0.0021345 | 0.0015269 | 0.0036614 | 125089     | 72                            | 48                              | 120                             |
| BEL  | 2018 | country | 4_Eur   | Belgium | 258   | 183   | 441   | 0.0020704 | 0.0014686 | 0.003539  | 124613     | 68                            | 46                              | 114                             |
| BEL  | 2019 | country | 4_Eur   | Belgium | 249   | 175   | 424   | 0.0020013 | 0.0014065 | 0.0034078 | 124422     | 67                            | 44                              | 111                             |
| BEN  | 2000 | country | 1_Afr   | Benin   | 11533 | 29522 | 41055 | 0.0395537 | 0.1012477 | 0.1408013 | 291579     | 613                           | 199                             | 812                             |
| BEN  | 2001 | country | 1_Afr   | Benin   | 11554 | 30923 | 42477 | 0.0387903 | 0.103819  | 0.1426094 | 297858     | 615                           | 189                             | 804                             |
| BEN  | 2002 | country | 1_Afr   | Benin   | 11577 | 27331 | 38908 | 0.0380352 | 0.0897929 | 0.1278281 | 304376     | 637                           | 182                             | 818                             |
| BEN  | 2003 | country | 1_Afr   | Benin   | 11612 | 26507 | 38119 | 0.0373285 | 0.0852116 | 0.1225401 | 311076     | 650                           | 171                             | 821                             |
| BEN  | 2004 | country | 1_Afr   | Benin   | 11674 | 25873 | 37547 | 0.0367097 | 0.0813592 | 0.1180688 | 318009     | 670                           | 153                             | 823                             |
| BEN  | 2005 | country | 1_Afr   | Benin   | 11771 | 25997 | 37768 | 0.0362029 | 0.0799552 | 0.1161582 | 325140     | 678                           | 140                             | 819                             |
| BEN  | 2006 | country | 1_Afr   | Benin   | 11895 | 25797 | 37692 | 0.0357823 | 0.0776012 | 0.1133835 | 332427     | 711                           | 108                             | 819                             |
| BEN  | 2007 | country | 1_Afr   | Benin   | 12050 | 25999 | 38049 | 0.035462  | 0.0765117 | 0.1119737 | 339800     | 722                           | 139                             | 861                             |
| BEN  | 2008 | country | 1_Afr   | Benin   | 12206 | 26450 | 38656 | 0.0351552 | 0.0761796 | 0.1113348 | 347203     | 742                           | 154                             | 896                             |
| BEN  | 2009 | country | 1_Afr   | Benin   | 12346 | 26763 | 39109 | 0.0348212 | 0.0754842 | 0.1103054 | 354554     | 756                           | 208                             | 964                             |
| BEN  | 2010 | country | 1_Afr   | Benin   | 12477 | 26329 | 38806 | 0.034484  | 0.0727694 | 0.1072535 | 361820     | 787                           | 221                             | 1008                            |
| BEN  | 2011 | country | 1_Afr   | Benin   | 12586 | 26195 | 38781 | 0.0341128 | 0.0709975 | 0.1051103 | 368952     | 784                           | 264                             | 1048                            |
| BEN  | 2012 | country | 1_Afr   | Benin   | 12669 | 25699 | 38368 | 0.0336995 | 0.0683598 | 0.1020593 | 375940     | 805                           | 456                             | 1261                            |
| BEN  | 2013 | country | 1_Afr   | Benin   | 12738 | 25945 | 38683 | 0.0332752 | 0.0677744 | 0.1010496 | 382808     | 832                           | 246                             | 1078                            |
| BEN  | 2014 | country | 1_Afr   | Benin   | 12783 | 26056 | 38839 | 0.0328129 | 0.0668834 | 0.0996962 | 389573     | 830                           | 223                             | 1053                            |
| BEN  | 2015 | country | 1_Afr   | Benin   | 12818 | 25152 | 37970 | 0.0323486 | 0.0634766 | 0.0958252 | 396246     | 842                           | 224                             | 1066                            |
| BEN  | 2016 | country | 1_Afr   | Benin   | 12853 | 25094 | 37947 | 0.0319012 | 0.0622822 | 0.0941834 | 402901     | 836                           | 338                             | 1174                            |
| BEN  | 2017 | country | 1_Afr   | Benin   | 12886 | 24935 | 37821 | 0.0314621 | 0.0608797 | 0.0923418 | 409572     | 859                           | 406                             | 1265                            |
| BEN  | 2018 | country | 1_Afr   | Benin   | 12921 | 25096 | 38017 | 0.0310357 | 0.0602785 | 0.0913143 | 416327     | 877                           | 299                             | 1176                            |
| BEN  | 2019 | country | 1_Afr   | Benin   | 12931 | 24617 | 37548 | 0.0305589 | 0.058176  | 0.0887349 | 423150     | 881                           | 302                             | 1183                            |

| iso3 | year | level   | whoreg6 | whoname      | nnd    | pnd    | u5d    | nmr       | pnmr      | u5mr      | Livebirths | Neonatal birth defects deaths | 1-59 month birth defects deaths | Under five birth defects deaths |
|------|------|---------|---------|--------------|--------|--------|--------|-----------|-----------|-----------|------------|-------------------------------|---------------------------------|---------------------------------|
| BFA  | 2000 | country | 1_Afr   | Burkina Faso | 21982  | 77559  | 99541  | 0.0408794 | 0.1442353 | 0.1851147 | 537728     | 925                           | 39                              | 964                             |
| BFA  | 2001 | country | 1_Afr   | Burkina Faso | 22099  | 71738  | 93837  | 0.040124  | 0.1302502 | 0.1703741 | 550768     | 977                           | 62                              | 1039                            |
| BFA  | 2002 | country | 1_Afr   | Burkina Faso | 22147  | 72987  | 95134  | 0.0392751 | 0.1294344 | 0.1687094 | 563895     | 1001                          | 75                              | 1077                            |
| BFA  | 2003 | country | 1_Afr   | Burkina Faso | 22122  | 70052  | 92174  | 0.0383366 | 0.1213968 | 0.1597335 | 577046     | 1045                          | 129                             | 1173                            |
| BFA  | 2004 | country | 1_Afr   | Burkina Faso | 21965  | 65853  | 87818  | 0.0372217 | 0.1115942 | 0.1488159 | 590113     | 1075                          | 184                             | 1259                            |
| BFA  | 2005 | country | 1_Afr   | Burkina Faso | 21709  | 64020  | 85729  | 0.0360017 | 0.1061696 | 0.1421713 | 603000     | 1092                          | 279                             | 1371                            |
| BFA  | 2006 | country | 1_Afr   | Burkina Faso | 21367  | 63031  | 84398  | 0.0347155 | 0.1024087 | 0.1371241 | 615489     | 1128                          | 367                             | 1495                            |
| BFA  | 2007 | country | 1_Afr   | Burkina Faso | 21044  | 61253  | 82297  | 0.0335339 | 0.0976078 | 0.1311418 | 627544     | 1144                          | 452                             | 1596                            |
| BFA  | 2008 | country | 1_Afr   | Burkina Faso | 20789  | 59205  | 79994  | 0.032529  | 0.0926399 | 0.1251689 | 639091     | 1185                          | 413                             | 1598                            |
| BFA  | 2009 | country | 1_Afr   | Burkina Faso | 20562  | 74987  | 95549  | 0.0316223 | 0.1153228 | 0.1469451 | 650238     | 1205                          | 249                             | 1453                            |
| BFA  | 2010 | country | 1_Afr   | Burkina Faso | 20438  | 58240  | 78678  | 0.0309188 | 0.0881057 | 0.1190245 | 661021     | 1249                          | 370                             | 1619                            |
| BFA  | 2011 | country | 1_Afr   | Burkina Faso | 20301  | 55610  | 75911  | 0.0302276 | 0.082801  | 0.1130286 | 671606     | 1243                          | 270                             | 1513                            |
| BFA  | 2012 | country | 1_Afr   | Burkina Faso | 20229  | 63982  | 84211  | 0.0296526 | 0.0937873 | 0.12344   | 682199     | 1271                          | 449                             | 1721                            |
| BFA  | 2013 | country | 1_Afr   | Burkina Faso | 20123  | 52761  | 72884  | 0.0290421 | 0.0761463 | 0.1051884 | 692891     | 1291                          | 373                             | 1664                            |
| BFA  | 2014 | country | 1_Afr   | Burkina Faso | 20074  | 51104  | 71178  | 0.0285214 | 0.0726091 | 0.1011305 | 703823     | 1327                          | 648                             | 1975                            |
| BFA  | 2015 | country | 1_Afr   | Burkina Faso | 20016  | 48803  | 68819  | 0.0279927 | 0.0682512 | 0.096244  | 715043     | 1354                          | 730                             | 2083                            |
| BFA  | 2016 | country | 1_Afr   | Burkina Faso | 19956  | 47857  | 67813  | 0.0274678 | 0.0658709 | 0.0933387 | 726524     | 1383                          | 782                             | 2165                            |
| BFA  | 2017 | country | 1_Afr   | Burkina Faso | 19905  | 46880  | 66785  | 0.0269643 | 0.0635057 | 0.09047   | 738198     | 1397                          | 801                             | 2198                            |
| BFA  | 2018 | country | 1_Afr   | Burkina Faso | 19866  | 50869  | 70735  | 0.0264884 | 0.0678267 | 0.094315  | 749990     | 1418                          | 818                             | 2236                            |
| BFA  | 2019 | country | 1_Afr   | Burkina Faso | 19767  | 45361  | 65128  | 0.0259442 | 0.0595369 | 0.085481  | 761905     | 1403                          | 829                             | 2231                            |
| BGD  | 2000 | country | 3_Sear  | Bangladesh   | 150029 | 152332 | 302361 | 0.0427631 | 0.0434195 | 0.0861826 | 3508375    | 6803                          | 3789                            | 10592                           |
| BGD  | 2001 | country | 3_Sear  | Bangladesh   | 143195 | 141061 | 284256 | 0.0410848 | 0.0404724 | 0.0815572 | 3485349    | 6769                          | 4135                            | 10904                           |
| BGD  | 2002 | country | 3_Sear  | Bangladesh   | 136430 | 129986 | 266416 | 0.0394778 | 0.0376131 | 0.0770909 | 3455862    | 6607                          | 3990                            | 10596                           |
| BGD  | 2003 | country | 3_Sear  | Bangladesh   | 129918 | 121282 | 251200 | 0.037985  | 0.0354601 | 0.0734451 | 3420241    | 6565                          | 4083                            | 10648                           |
| BGD  | 2004 | country | 3_Sear  | Bangladesh   | 123436 | 122679 | 246115 | 0.0365274 | 0.0363035 | 0.0728308 | 3379274    | 6548                          | 4532                            | 11081                           |
| BGD  | 2005 | country | 3_Sear  | Bangladesh   | 117138 | 112703 | 229841 | 0.0351298 | 0.0337998 | 0.0689296 | 3334434    | 6446                          | 5221                            | 11668                           |
| BGD  | 2006 | country | 3_Sear  | Bangladesh   | 110896 | 101009 | 211905 | 0.0337312 | 0.0307239 | 0.0644551 | 3287637    | 6328                          | 4561                            | 10890                           |
| BGD  | 2007 | country | 3_Sear  | Bangladesh   | 104858 | 80640  | 185498 | 0.0323523 | 0.0248801 | 0.0572324 | 3241133    | 6217                          | 3623                            | 9840                            |
| BGD  | 2008 | country | 3_Sear  | Bangladesh   | 99033  | 76469  | 175502 | 0.0309771 | 0.0239192 | 0.0548963 | 3196973    | 6122                          | 3871                            | 9993                            |
| BGD  | 2009 | country | 3_Sear  | Bangladesh   | 93498  | 69986  | 163484 | 0.0296218 | 0.0221728 | 0.0517947 | 3156390    | 6111                          | 4005                            | 10115                           |
| BGD  | 2010 | country | 3_Sear  | Bangladesh   | 88248  | 64942  | 153190 | 0.0282813 | 0.0208123 | 0.0490936 | 3120367    | 5917                          | 3580                            | 9497                            |
| BGD  | 2011 | country | 3_Sear  | Bangladesh   | 83370  | 62039  | 145409 | 0.0269874 | 0.0200825 | 0.0470699 | 3089219    | 5905                          | 3919                            | 9824                            |
| BGD  | 2012 | country | 3_Sear  | Bangladesh   | 78881  | 55758  | 134639 | 0.0257616 | 0.01821   | 0.0439717 | 3061959    | 5771                          | 3426                            | 9198                            |
| BGD  | 2013 | country | 3_Sear  | Bangladesh   | 74762  | 51880  | 126642 | 0.0246135 | 0.0170801 | 0.0416937 | 3037438    | 5731                          | 4919                            | 10650                           |
| BGD  | 2014 | country | 3_Sear  | Bangladesh   | 70921  | 48413  | 119334 | 0.0235217 | 0.0160569 | 0.0395786 | 3015125    | 5701                          | 5036                            | 10737                           |
| BGD  | 2015 | country | 3_Sear  | Bangladesh   | 67411  | 44038  | 111449 | 0.0225127 | 0.014707  | 0.0372198 | 2994348    | 5599                          | 5363                            | 10962                           |
| BGD  | 2016 | country | 3_Sear  | Bangladesh   | 64134  | 41226  | 105360 | 0.0215614 | 0.0138599 | 0.0354213 | 2974485    | 5597                          | 3738                            | 9335                            |
| BGD  | 2017 | country | 3_Sear  | Bangladesh   | 61061  | 41258  | 102319 | 0.0206644 | 0.0139628 | 0.0346272 | 2954887    | 5481                          | 3107                            | 8587                            |
| BGD  | 2018 | country | 3_Sear  | Bangladesh   | 58203  | 39429  | 97632  | 0.0198326 | 0.0134352 | 0.0332679 | 2934708    | 5451                          | 2652                            | 8103                            |
| BGD  | 2019 | country | 3_Sear  | Bangladesh   | 55542  | 42217  | 97759  | 0.0190645 | 0.0144907 | 0.0335552 | 2913368    | 5436                          | 2633                            | 8069                            |

| iso3 | year | level   | whoreg6 | whoname  | nnd | pnd | u5d  | nmr       | pnmr      | u5mr      | Livebirths | Neonatal birth defects deaths | 1-59 month birth defects deaths | Under five birth defects deaths |
|------|------|---------|---------|----------|-----|-----|------|-----------|-----------|-----------|------------|-------------------------------|---------------------------------|---------------------------------|
| BGR  | 2000 | country | 4_Eur   | Bulgaria | 511 | 644 | 1155 | 0.0078271 | 0.0098642 | 0.0176913 | 65286      | 155                           | 164                             | 319                             |
| BGR  | 2001 | country | 4_Eur   | Bulgaria | 495 | 602 | 1097 | 0.0075234 | 0.0091497 | 0.0166731 | 65794      | 152                           | 164                             | 316                             |
| BGR  | 2002 | country | 4_Eur   | Bulgaria | 485 | 574 | 1059 | 0.0072432 | 0.0085724 | 0.0158156 | 66959      | 154                           | 132                             | 286                             |
| BGR  | 2003 | country | 4_Eur   | Bulgaria | 472 | 551 | 1023 | 0.00688   | 0.0080316 | 0.0149116 | 68604      | 147                           | 119                             | 265                             |
| BGR  | 2004 | country | 4_Eur   | Bulgaria | 453 | 527 | 980  | 0.0064233 | 0.0074726 | 0.0138958 | 70525      | 138                           | 122                             | 260                             |
| BGR  | 2005 | country | 4_Eur   | Bulgaria | 433 | 503 | 936  | 0.0059863 | 0.0069541 | 0.0129403 | 72332      | 147                           | 109                             | 257                             |
| BGR  | 2006 | country | 4_Eur   | Bulgaria | 413 | 485 | 898  | 0.0055984 | 0.0065744 | 0.0121728 | 73771      | 131                           | 73                              | 204                             |
| BGR  | 2007 | country | 4_Eur   | Bulgaria | 398 | 469 | 867  | 0.0053204 | 0.0062696 | 0.01159   | 74806      | 98                            | 94                              | 192                             |
| BGR  | 2008 | country | 4_Eur   | Bulgaria | 389 | 456 | 845  | 0.0051813 | 0.0060737 | 0.0112549 | 75078      | 109                           | 107                             | 216                             |
| BGR  | 2009 | country | 4_Eur   | Bulgaria | 385 | 443 | 828  | 0.0051605 | 0.005938  | 0.0110985 | 74605      | 94                            | 84                              | 178                             |
| BGR  | 2010 | country | 4_Eur   | Bulgaria | 377 | 427 | 804  | 0.0051234 | 0.0058028 | 0.0109262 | 73585      | 94                            | 101                             | 196                             |
| BGR  | 2011 | country | 4_Eur   | Bulgaria | 359 | 403 | 762  | 0.0049755 | 0.0055853 | 0.0105607 | 72154      | 95                            | 110                             | 205                             |
| BGR  | 2012 | country | 4_Eur   | Bulgaria | 335 | 371 | 706  | 0.0047421 | 0.0052517 | 0.0099939 | 70643      | 79                            | 88                              | 167                             |
| BGR  | 2013 | country | 4_Eur   | Bulgaria | 309 | 339 | 648  | 0.0044876 | 0.0049233 | 0.0094108 | 68857      | 79                            | 94                              | 174                             |
| BGR  | 2014 | country | 4_Eur   | Bulgaria | 286 | 307 | 593  | 0.0042501 | 0.0045622 | 0.0088122 | 67293      | 66                            | 66                              | 132                             |
| BGR  | 2015 | country | 4_Eur   | Bulgaria | 266 | 280 | 546  | 0.0040365 | 0.0042489 | 0.0082854 | 65899      | 89                            | 82                              | 171                             |
| BGR  | 2016 | country | 4_Eur   | Bulgaria | 250 | 258 | 508  | 0.0038549 | 0.0039782 | 0.0078331 | 64853      | 68                            | 68                              | 136                             |
| BGR  | 2017 | country | 4_Eur   | Bulgaria | 235 | 241 | 476  | 0.0036783 | 0.0037723 | 0.0074506 | 63887      | 66                            | 63                              | 129                             |
| BGR  | 2018 | country | 4_Eur   | Bulgaria | 220 | 228 | 448  | 0.0034935 | 0.0036206 | 0.0071141 | 62973      | 65                            | 60                              | 125                             |
| BGR  | 2019 | country | 4_Eur   | Bulgaria | 206 | 216 | 422  | 0.0033313 | 0.003493  | 0.0068243 | 61837      | 58                            | 57                              | 115                             |
| BHR  | 2000 | country | 5_Emr   | Bahrain  | 70  | 112 | 182  | 0.0047514 | 0.0076023 | 0.0123537 | 14732      | 30                            | 38                              | 67                              |
| BHR  | 2001 | country | 5_Emr   | Bahrain  | 67  | 112 | 179  | 0.0043838 | 0.0073281 | 0.0117119 | 15284      | 30                            | 52                              | 83                              |
| BHR  | 2002 | country | 5_Emr   | Bahrain  | 64  | 113 | 177  | 0.0041238 | 0.0072811 | 0.0114049 | 15520      | 31                            | 43                              | 74                              |
| BHR  | 2003 | country | 5_Emr   | Bahrain  | 63  | 114 | 177  | 0.0039199 | 0.0070932 | 0.0110132 | 16072      | 26                            | 52                              | 78                              |
| BHR  | 2004 | country | 5_Emr   | Bahrain  | 62  | 115 | 177  | 0.0037437 | 0.006944  | 0.0106878 | 16561      | 19                            | 34                              | 52                              |
| BHR  | 2005 | country | 5_Emr   | Bahrain  | 61  | 116 | 177  | 0.0035866 | 0.0068205 | 0.0104071 | 17008      | 20                            | 34                              | 54                              |
| BHR  | 2006 | country | 5_Emr   | Bahrain  | 61  | 115 | 176  | 0.0034432 | 0.0064913 | 0.0099345 | 17716      | 14                            | 39                              | 54                              |
| BHR  | 2007 | country | 5_Emr   | Bahrain  | 60  | 113 | 173  | 0.0033198 | 0.0062523 | 0.009572  | 18073      | 24                            | 49                              | 73                              |
| BHR  | 2008 | country | 5_Emr   | Bahrain  | 60  | 110 | 170  | 0.0032296 | 0.005921  | 0.0091507 | 18578      | 22                            | 33                              | 55                              |
| BHR  | 2009 | country | 5_Emr   | Bahrain  | 61  | 106 | 167  | 0.003174  | 0.0055155 | 0.0086896 | 19218      | 26                            | 30                              | 55                              |
| BHR  | 2010 | country | 5_Emr   | Bahrain  | 62  | 102 | 164  | 0.0031516 | 0.0051849 | 0.0083365 | 19672      | 32                            | 31                              | 63                              |
| BHR  | 2011 | country | 5_Emr   | Bahrain  | 64  | 99  | 163  | 0.0031628 | 0.0048925 | 0.0080553 | 20235      | 40                            | 35                              | 75                              |
| BHR  | 2012 | country | 5_Emr   | Bahrain  | 66  | 96  | 162  | 0.0031908 | 0.0046411 | 0.0078319 | 20685      | 27                            | 30                              | 57                              |
| BHR  | 2013 | country | 5_Emr   | Bahrain  | 67  | 94  | 161  | 0.0032134 | 0.0045084 | 0.0077218 | 20850      | 22                            | 34                              | 56                              |
| BHR  | 2014 | country | 5_Emr   | Bahrain  | 68  | 93  | 161  | 0.0032189 | 0.0044023 | 0.0076211 | 21126      | 24                            | 31                              | 55                              |
| BHR  | 2015 | country | 5_Emr   | Bahrain  | 69  | 92  | 161  | 0.0032065 | 0.0042753 | 0.0074817 | 21519      | 25                            | 31                              | 56                              |
| BHR  | 2016 | country | 5_Emr   | Bahrain  | 69  | 90  | 159  | 0.0031658 | 0.0041293 | 0.0072951 | 21796      | 24                            | 30                              | 54                              |
| BHR  | 2017 | country | 5_Emr   | Bahrain  | 68  | 89  | 157  | 0.0031058 | 0.0040649 | 0.0071707 | 21895      | 24                            | 30                              | 54                              |
| BHR  | 2018 | country | 5_Emr   | Bahrain  | 66  | 88  | 154  | 0.003025  | 0.0040334 | 0.0070584 | 21818      | 24                            | 30                              | 53                              |
| BHR  | 2019 | country | 5_Emr   | Bahrain  | 65  | 86  | 151  | 0.0029391 | 0.0038887 | 0.0068278 | 22115      | 23                            | 29                              | 52                              |

| iso3 | year | level   | whoreg6 | whoname           | nnd | pnd | u5d | nmr       | pnmr      | u5mr      | Livebirths | Neonatal birth defects deaths | 1-59 month birth defects deaths | Under five birth defects deaths |
|------|------|---------|---------|-------------------|-----|-----|-----|-----------|-----------|-----------|------------|-------------------------------|---------------------------------|---------------------------------|
| BHS  | 2000 | country | 2_Amr   | Bahamas           | 43  | 45  | 88  | 0.0080729 | 0.0084484 | 0.0165213 | 5326       | 7                             | 10                              | 18                              |
| BHS  | 2001 | country | 2_Amr   | Bahamas           | 42  | 44  | 86  | 0.0082246 | 0.0086162 | 0.0168408 | 5107       | 5                             | 7                               | 13                              |
| BHS  | 2002 | country | 2_Amr   | Bahamas           | 42  | 42  | 84  | 0.0083999 | 0.0083999 | 0.0167999 | 5000       | 6                             | 2                               | 8                               |
| BHS  | 2003 | country | 2_Amr   | Bahamas           | 42  | 42  | 84  | 0.0085318 | 0.0085318 | 0.0170636 | 4923       | 6                             | 15                              | 21                              |
| BHS  | 2004 | country | 2_Amr   | Bahamas           | 43  | 41  | 84  | 0.008598  | 0.0081981 | 0.0167962 | 5001       | 9                             | 12                              | 21                              |
| BHS  | 2005 | country | 2_Amr   | Bahamas           | 43  | 41  | 84  | 0.008547  | 0.0081494 | 0.0166964 | 5031       | 4                             | 6                               | 10                              |
| BHS  | 2006 | country | 2_Amr   | Bahamas           | 44  | 40  | 84  | 0.0085916 | 0.0078106 | 0.0164022 | 5121       | 3                             | 21                              | 23                              |
| BHS  | 2007 | country | 2_Amr   | Bahamas           | 45  | 39  | 84  | 0.0087339 | 0.0075694 | 0.0163032 | 5152       | 5                             | 13                              | 17                              |
| BHS  | 2008 | country | 2_Amr   | Bahamas           | 45  | 39  | 84  | 0.0085986 | 0.0074521 | 0.0160507 | 5233       | 5                             | 6                               | 10                              |
| BHS  | 2009 | country | 2_Amr   | Bahamas           | 44  | 39  | 83  | 0.008417  | 0.0074605 | 0.0158775 | 5228       | 4                             | 2                               | 6                               |
| BHS  | 2010 | country | 2_Amr   | Bahamas           | 43  | 39  | 82  | 0.0080109 | 0.0072657 | 0.0152766 | 5368       | 10                            | 2                               | 12                              |
| BHS  | 2011 | country | 2_Amr   | Bahamas           | 42  | 38  | 80  | 0.0078148 | 0.0070706 | 0.0148854 | 5374       | 4                             | 0                               | 4                               |
| BHS  | 2012 | country | 2_Amr   | Bahamas           | 41  | 38  | 79  | 0.0076721 | 0.0071107 | 0.0147827 | 5344       | 8                             | 2                               | 10                              |
| BHS  | 2013 | country | 2_Amr   | Bahamas           | 41  | 36  | 77  | 0.007791  | 0.0068409 | 0.014632  | 5262       | 7                             | 9                               | 17                              |
| BHS  | 2014 | country | 2_Amr   | Bahamas           | 40  | 36  | 76  | 0.0075647 | 0.0068082 | 0.0143729 | 5288       | 6                             | 11                              | 17                              |
| BHS  | 2015 | country | 2_Amr   | Bahamas           | 40  | 34  | 74  | 0.007559  | 0.0064251 | 0.0139841 | 5292       | 7                             | 7                               | 14                              |
| BHS  | 2016 | country | 2_Amr   | Bahamas           | 39  | 34  | 73  | 0.0073866 | 0.0064396 | 0.0138262 | 5280       | 7                             | 7                               | 14                              |
| BHS  | 2017 | country | 2_Amr   | Bahamas           | 38  | 33  | 71  | 0.0069756 | 0.0060578 | 0.0130334 | 5448       | 7                             | 7                               | 13                              |
| BHS  | 2018 | country | 2_Amr   | Bahamas           | 37  | 32  | 69  | 0.0068    | 0.0058811 | 0.0126811 | 5441       | 6                             | 7                               | 13                              |
| BHS  | 2019 | country | 2_Amr   | Bahamas           | 36  | 32  | 68  | 0.0066485 | 0.0059098 | 0.0125583 | 5415       | 6                             | 7                               | 13                              |
| BIH  | 2000 | country | 4_Eur   | Bosnia and Herzeg | 283 | 142 | 425 | 0.0068743 | 0.0034413 | 0.0103156 | 41168      | 77                            | 43                              | 120                             |
| BIH  | 2001 | country | 4_Eur   | Bosnia and Herzeg | 255 | 134 | 389 | 0.0065192 | 0.003414  | 0.0099332 | 39115      | 70                            | 41                              | 111                             |
| BIH  | 2002 | country | 4_Eur   | Bosnia and Herzeg | 231 | 130 | 361 | 0.0061961 | 0.0034991 | 0.0096952 | 37281      | 62                            | 41                              | 102                             |
| BIH  | 2003 | country | 4_Eur   | Bosnia and Herzeg | 213 | 127 | 340 | 0.0059183 | 0.0035394 | 0.0094577 | 35990      | 57                            | 40                              | 97                              |
| BIH  | 2004 | country | 4_Eur   | Bosnia and Herzeg | 200 | 125 | 325 | 0.0056913 | 0.0035662 | 0.0092575 | 35141      | 54                            | 40                              | 94                              |
| BIH  | 2005 | country | 4_Eur   | Bosnia and Herzeg | 191 | 121 | 312 | 0.0055098 | 0.0034981 | 0.0090079 | 34665      | 52                            | 39                              | 91                              |
| BIH  | 2006 | country | 4_Eur   | Bosnia and Herzeg | 186 | 113 | 299 | 0.0053749 | 0.0032715 | 0.0086464 | 34605      | 51                            | 37                              | 87                              |
| BIH  | 2007 | country | 4_Eur   | Bosnia and Herzeg | 183 | 103 | 286 | 0.0053031 | 0.0029923 | 0.0082954 | 34508      | 49                            | 34                              | 83                              |
| BIH  | 2008 | country | 4_Eur   | Bosnia and Herzeg | 181 | 91  | 272 | 0.0052581 | 0.0026499 | 0.007908  | 34423      | 50                            | 30                              | 80                              |
| BIH  | 2009 | country | 4_Eur   | Bosnia and Herzeg | 178 | 80  | 258 | 0.0051949 | 0.0023406 | 0.0075354 | 34264      | 49                            | 27                              | 76                              |
| BIH  | 2010 | country | 4_Eur   | Bosnia and Herzeg | 173 | 72  | 245 | 0.0051025 | 0.0021295 | 0.0072319 | 33905      | 48                            | 24                              | 72                              |
| BIH  | 2011 | country | 4_Eur   | Bosnia and Herzeg | 167 | 65  | 232 | 0.0049964 | 0.0019505 | 0.0069469 | 33424      | 46                            | 22                              | 69                              |
| BIH  | 2012 | country | 4_Eur   | Bosnia and Herzeg | 159 | 61  | 220 | 0.0048766 | 0.0018768 | 0.0067534 | 32605      | 44                            | 21                              | 65                              |
| BIH  | 2013 | country | 4_Eur   | Bosnia and Herzeg | 151 | 58  | 209 | 0.0047596 | 0.0018341 | 0.0065937 | 31726      | 43                            | 20                              | 63                              |
| BIH  | 2014 | country | 4_Eur   | Bosnia and Herzeg | 144 | 59  | 203 | 0.0046521 | 0.001891  | 0.0065431 | 30954      | 40                            | 20                              | 60                              |
| BIH  | 2015 | country | 4_Eur   | Bosnia and Herzeg | 137 | 55  | 192 | 0.0045567 | 0.0018312 | 0.0063879 | 30065      | 38                            | 19                              | 57                              |
| BIH  | 2016 | country | 4_Eur   | Bosnia and Herzeg | 130 | 54  | 184 | 0.0044678 | 0.0018622 | 0.00633   | 29097      | 37                            | 19                              | 56                              |
| BIH  | 2017 | country | 4_Eur   | Bosnia and Herzeg | 123 | 53  | 176 | 0.0043896 | 0.0018905 | 0.0062801 | 28021      | 34                            | 18                              | 52                              |
| BIH  | 2018 | country | 4_Eur   | Bosnia and Herzeg | 117 | 51  | 168 | 0.0043068 | 0.0018768 | 0.0061836 | 27166      | 33                            | 17                              | 50                              |
| BIH  | 2019 | country | 4_Eur   | Bosnia and Herzeg | 111 | 49  | 160 | 0.0042179 | 0.0018538 | 0.0060716 | 26317      | 31                            | 16                              | 48                              |

| iso3 | year | level   | whoreg6 | whoname | nnd | pnd | u5d  | nmr       | pnmr      | u5mr      | Livebirths | Neonatal birth defects deaths | 1-59 month birth defects deaths | Under five birth defects deaths |
|------|------|---------|---------|---------|-----|-----|------|-----------|-----------|-----------|------------|-------------------------------|---------------------------------|---------------------------------|
| BLR  | 2000 | country | 4_Eur   | Belarus | 533 | 618 | 1151 | 0.0060414 | 0.0070048 | 0.0130462 | 88225      | 145                           | 178                             | 322                             |
| BLR  | 2001 | country | 4_Eur   | Belarus | 480 | 566 | 1046 | 0.0054618 | 0.0064404 | 0.0119022 | 87883      | 131                           | 167                             | 298                             |
| BLR  | 2002 | country | 4_Eur   | Belarus | 437 | 523 | 960  | 0.0049322 | 0.0059029 | 0.0108351 | 88601      | 121                           | 158                             | 280                             |
| BLR  | 2003 | country | 4_Eur   | Belarus | 401 | 491 | 892  | 0.0044541 | 0.0054538 | 0.0099079 | 90029      | 115                           | 151                             | 266                             |
| BLR  | 2004 | country | 4_Eur   | Belarus | 367 | 469 | 836  | 0.0039863 | 0.0050942 | 0.0090806 | 92065      | 106                           | 148                             | 254                             |
| BLR  | 2005 | country | 4_Eur   | Belarus | 330 | 457 | 787  | 0.003485  | 0.0048262 | 0.0083112 | 94691      | 97                            | 146                             | 243                             |
| BLR  | 2006 | country | 4_Eur   | Belarus | 292 | 450 | 742  | 0.0029919 | 0.0046109 | 0.0076028 | 97596      | 86                            | 148                             | 234                             |
| BLR  | 2007 | country | 4_Eur   | Belarus | 257 | 443 | 700  | 0.0025493 | 0.0043942 | 0.0069435 | 100814     | 77                            | 151                             | 228                             |
| BLR  | 2008 | country | 4_Eur   | Belarus | 228 | 431 | 659  | 0.0021978 | 0.0041546 | 0.0063524 | 103740     | 68                            | 149                             | 218                             |
| BLR  | 2009 | country | 4_Eur   | Belarus | 210 | 412 | 622  | 0.0019588 | 0.003843  | 0.0058019 | 107207     | 64                            | 145                             | 209                             |
| BLR  | 2010 | country | 4_Eur   | Belarus | 202 | 386 | 588  | 0.0018433 | 0.0035224 | 0.0053657 | 109585     | 62                            | 138                             | 199                             |
| BLR  | 2011 | country | 4_Eur   | Belarus | 202 | 356 | 558  | 0.0018102 | 0.0031902 | 0.0050004 | 111591     | 62                            | 128                             | 191                             |
| BLR  | 2012 | country | 4_Eur   | Belarus | 204 | 327 | 531  | 0.0018015 | 0.0028877 | 0.0046892 | 113240     | 62                            | 119                             | 182                             |
| BLR  | 2013 | country | 4_Eur   | Belarus | 204 | 303 | 507  | 0.0017802 | 0.0026441 | 0.0044243 | 114595     | 63                            | 113                             | 175                             |
| BLR  | 2014 | country | 4_Eur   | Belarus | 199 | 285 | 484  | 0.0017304 | 0.0024782 | 0.0042086 | 115004     | 61                            | 108                             | 169                             |
| BLR  | 2015 | country | 4_Eur   | Belarus | 188 | 273 | 461  | 0.0016422 | 0.0023847 | 0.004027  | 114478     | 59                            | 105                             | 163                             |
| BLR  | 2016 | country | 4_Eur   | Belarus | 174 | 263 | 437  | 0.0015299 | 0.0023125 | 0.0038424 | 113731     | 54                            | 102                             | 156                             |
| BLR  | 2017 | country | 4_Eur   | Belarus | 160 | 251 | 411  | 0.0014137 | 0.0022177 | 0.0036313 | 113181     | 50                            | 99                              | 149                             |
| BLR  | 2018 | country | 4_Eur   | Belarus | 146 | 239 | 385  | 0.0013064 | 0.0021386 | 0.0034451 | 111754     | 46                            | 96                              | 141                             |
| BLR  | 2019 | country | 4_Eur   | Belarus | 133 | 227 | 360  | 0.0012143 | 0.0020726 | 0.0032869 | 109525     | 42                            | 91                              | 133                             |
| BLZ  | 2000 | country | 2_Amr   | Belize  | 88  | 83  | 171  | 0.0120355 | 0.0113517 | 0.0233873 | 7312       | 20                            | 9                               | 30                              |
| BLZ  | 2001 | country | 2_Amr   | Belize  | 86  | 81  | 167  | 0.0115823 | 0.0109089 | 0.0224912 | 7425       | 18                            | 11                              | 28                              |
| BLZ  | 2002 | country | 2_Amr   | Belize  | 83  | 81  | 164  | 0.0111098 | 0.0108421 | 0.021952  | 7471       | 13                            | 9                               | 23                              |
| BLZ  | 2003 | country | 2_Amr   | Belize  | 80  | 82  | 162  | 0.0106016 | 0.0108667 | 0.0214683 | 7546       | 18                            | 2                               | 20                              |
| BLZ  | 2004 | country | 2_Amr   | Belize  | 75  | 84  | 159  | 0.0100238 | 0.0112267 | 0.0212506 | 7482       | 16                            | 12                              | 28                              |
| BLZ  | 2005 | country | 2_Amr   | Belize  | 70  | 86  | 156  | 0.009403  | 0.0115523 | 0.0209553 | 7444       | 10                            | 14                              | 24                              |
| BLZ  | 2006 | country | 2_Amr   | Belize  | 66  | 88  | 154  | 0.0088431 | 0.0117908 | 0.0206339 | 7463       | 14                            | 9                               | 22                              |
| BLZ  | 2007 | country | 2_Amr   | Belize  | 64  | 87  | 151  | 0.0085088 | 0.0115667 | 0.0200755 | 7522       | 11                            | 21                              | 33                              |
| BLZ  | 2008 | country | 2_Amr   | Belize  | 64  | 84  | 148  | 0.0085    | 0.0111562 | 0.0196562 | 7529       | 14                            | 8                               | 21                              |
| BLZ  | 2009 | country | 2_Amr   | Belize  | 66  | 79  | 145  | 0.0087987 | 0.0105318 | 0.0193305 | 7501       | 15                            | 12                              | 28                              |
| BLZ  | 2010 | country | 2_Amr   | Belize  | 71  | 71  | 142  | 0.0093484 | 0.0093484 | 0.0186968 | 7595       | 19                            | 17                              | 35                              |
| BLZ  | 2011 | country | 2_Amr   | Belize  | 76  | 63  | 139  | 0.0099496 | 0.0082477 | 0.0181974 | 7638       | 19                            | 19                              | 39                              |
| BLZ  | 2012 | country | 2_Amr   | Belize  | 80  | 55  | 135  | 0.010352  | 0.007117  | 0.0174689 | 7728       | 13                            | 10                              | 24                              |
| BLZ  | 2013 | country | 2_Amr   | Belize  | 81  | 49  | 130  | 0.0104564 | 0.0063255 | 0.0167819 | 7746       | 20                            | 13                              | 34                              |
| BLZ  | 2014 | country | 2_Amr   | Belize  | 80  | 45  | 125  | 0.0103189 | 0.0058044 | 0.0161233 | 7753       | 14                            | 15                              | 28                              |
| BLZ  | 2015 | country | 2_Amr   | Belize  | 78  | 41  | 119  | 0.0100103 | 0.0052618 | 0.0152721 | 7792       | 16                            | 8                               | 24                              |
| BLZ  | 2016 | country | 2_Amr   | Belize  | 76  | 38  | 114  | 0.0095908 | 0.0047954 | 0.0143862 | 7924       | 15                            | 9                               | 24                              |
| BLZ  | 2017 | country | 2_Amr   | Belize  | 72  | 36  | 108  | 0.0091035 | 0.0045517 | 0.0136552 | 7909       | 13                            | 9                               | 23                              |
| BLZ  | 2018 | country | 2_Amr   | Belize  | 69  | 34  | 103  | 0.0086079 | 0.0042416 | 0.0128495 | 8016       | 13                            | 9                               | 22                              |
| BLZ  | 2019 | country | 2_Amr   | Belize  | 65  | 33  | 98   | 0.0081374 | 0.0041313 | 0.0122687 | 7988       | 12                            | 8                               | 21                              |

| iso3 | year | level   | whoreg6 | whoname                          | nnd   | pnd   | u5d    | nmr       | pnmr      | u5mr      | Livebirths | Neonatal birth defects deaths | 1-59 month birth defects deaths | Under five birth defects deaths |
|------|------|---------|---------|----------------------------------|-------|-------|--------|-----------|-----------|-----------|------------|-------------------------------|---------------------------------|---------------------------------|
| BOL  | 2000 | country | 2_Amr   | Bolivia (Plurinational State of) | 7427  | 11602 | 19029  | 0.0290939 | 0.0454487 | 0.0745426 | 255277     | 584                           | 825                             | 1410                            |
| BOL  | 2001 | country | 2_Amr   | Bolivia (Plurinational State of) | 7197  | 10804 | 18001  | 0.0281416 | 0.0422456 | 0.0703872 | 255743     | 586                           | 913                             | 1499                            |
| BOL  | 2002 | country | 2_Amr   | Bolivia (Plurinational State of) | 7002  | 9987  | 16989  | 0.0273648 | 0.0390306 | 0.0663954 | 255876     | 575                           | 966                             | 1541                            |
| BOL  | 2003 | country | 2_Amr   | Bolivia (Plurinational State of) | 6840  | 9180  | 16020  | 0.0267439 | 0.0358931 | 0.0626369 | 255760     | 586                           | 1046                            | 1632                            |
| BOL  | 2004 | country | 2_Amr   | Bolivia (Plurinational State of) | 6680  | 8405  | 15085  | 0.0261543 | 0.0329082 | 0.0590625 | 255407     | 572                           | 888                             | 1460                            |
| BOL  | 2005 | country | 2_Amr   | Bolivia (Plurinational State of) | 6501  | 7680  | 14181  | 0.0255112 | 0.0301378 | 0.055649  | 254829     | 572                           | 833                             | 1405                            |
| BOL  | 2006 | country | 2_Amr   | Bolivia (Plurinational State of) | 6293  | 7029  | 13322  | 0.0247594 | 0.0276552 | 0.0524146 | 254166     | 553                           | 780                             | 1332                            |
| BOL  | 2007 | country | 2_Amr   | Bolivia (Plurinational State of) | 6062  | 6440  | 12502  | 0.0239191 | 0.0254105 | 0.0493296 | 253438     | 544                           | 714                             | 1258                            |
| BOL  | 2008 | country | 2_Amr   | Bolivia (Plurinational State of) | 5821  | 5917  | 11738  | 0.0230353 | 0.0234152 | 0.0464505 | 252699     | 532                           | 788                             | 1320                            |
| BOL  | 2009 | country | 2_Amr   | Bolivia (Plurinational State of) | 5569  | 5455  | 11024  | 0.0220938 | 0.0216415 | 0.0437352 | 252062     | 517                           | 774                             | 1291                            |
| BOL  | 2010 | country | 2_Amr   | Bolivia (Plurinational State of) | 5318  | 5036  | 10354  | 0.0211507 | 0.0200292 | 0.0411799 | 251433     | 508                           | 668                             | 1176                            |
| BOL  | 2011 | country | 2_Amr   | Bolivia (Plurinational State of) | 5074  | 4664  | 9738   | 0.0202303 | 0.0185956 | 0.038826  | 250812     | 490                           | 746                             | 1237                            |
| BOL  | 2012 | country | 2_Amr   | Bolivia (Plurinational State of) | 4837  | 4323  | 9160   | 0.0193338 | 0.0172793 | 0.0366132 | 250183     | 493                           | 654                             | 1147                            |
| BOL  | 2013 | country | 2_Amr   | Bolivia (Plurinational State of) | 4617  | 3997  | 8614   | 0.0185081 | 0.0160227 | 0.0345309 | 249458     | 495                           | 542                             | 1037                            |
| BOL  | 2014 | country | 2_Amr   | Bolivia (Plurinational State of) | 4411  | 3702  | 8113   | 0.0177369 | 0.014886  | 0.0326228 | 248691     | 495                           | 514                             | 1008                            |
| BOL  | 2015 | country | 2_Amr   | Bolivia (Plurinational State of) | 4231  | 3441  | 7672   | 0.0170592 | 0.013874  | 0.0309332 | 248018     | 503                           | 500                             | 1003                            |
| BOL  | 2016 | country | 2_Amr   | Bolivia (Plurinational State of) | 4082  | 3198  | 7280   | 0.0164948 | 0.0129227 | 0.0294175 | 247472     | 520                           | 431                             | 951                             |
| BOL  | 2017 | country | 2_Amr   | Bolivia (Plurinational State of) | 3907  | 3044  | 6951   | 0.0158125 | 0.0123197 | 0.0281322 | 247083     | 524                           | 359                             | 883                             |
| BOL  | 2018 | country | 2_Amr   | Bolivia (Plurinational State of) | 3742  | 2909  | 6651   | 0.0151501 | 0.0117775 | 0.0269276 | 246995     | 515                           | 352                             | 867                             |
| BOL  | 2019 | country | 2_Amr   | Bolivia (Plurinational State of) | 3598  | 2801  | 6399   | 0.0145618 | 0.0113362 | 0.025898  | 247085     | 508                           | 352                             | 860                             |
| BRA  | 2000 | country | 2_Amr   | Brazil                           | 63185 | 58880 | 122065 | 0.0179792 | 0.0167542 | 0.0347334 | 3514344    | 8545                          | 8813                            | 17357                           |
| BRA  | 2001 | country | 2_Amr   | Brazil                           | 60028 | 52763 | 112791 | 0.017345  | 0.0152458 | 0.0325908 | 3460822    | 8615                          | 7734                            | 16349                           |
| BRA  | 2002 | country | 2_Amr   | Brazil                           | 56725 | 47075 | 103800 | 0.016683  | 0.0138449 | 0.030528  | 3400158    | 8273                          | 7649                            | 15922                           |
| BRA  | 2003 | country | 2_Amr   | Brazil                           | 52967 | 42320 | 95287  | 0.0158783 | 0.0126866 | 0.0285649 | 3335812    | 8109                          | 7098                            | 15207                           |
| BRA  | 2004 | country | 2_Amr   | Brazil                           | 48888 | 38493 | 87381  | 0.0149483 | 0.0117699 | 0.0267182 | 3270464    | 7945                          | 6773                            | 14718                           |
| BRA  | 2005 | country | 2_Amr   | Brazil                           | 45195 | 34972 | 80167  | 0.0140902 | 0.010903  | 0.0249932 | 3207554    | 7246                          | 6380                            | 13627                           |
| BRA  | 2006 | country | 2_Amr   | Brazil                           | 41966 | 31796 | 73762  | 0.013322  | 0.0100936 | 0.0234156 | 3150118    | 7159                          | 6202                            | 13361                           |
| BRA  | 2007 | country | 2_Amr   | Brazil                           | 39220 | 29019 | 68239  | 0.0126519 | 0.0093612 | 0.0220131 | 3099926    | 6791                          | 6094                            | 12886                           |
| BRA  | 2008 | country | 2_Amr   | Brazil                           | 37002 | 26478 | 63480  | 0.0121    | 0.0086585 | 0.0207585 | 3058024    | 6758                          | 5768                            | 12527                           |
| BRA  | 2009 | country | 2_Amr   | Brazil                           | 35179 | 24351 | 59530  | 0.0116289 | 0.0080495 | 0.0196784 | 3025142    | 6449                          | 5393                            | 11841                           |
| BRA  | 2010 | country | 2_Amr   | Brazil                           | 33515 | 22786 | 56301  | 0.0111662 | 0.0075916 | 0.0187579 | 3001462    | 6426                          | 5280                            | 11706                           |
| BRA  | 2011 | country | 2_Amr   | Brazil                           | 31952 | 21689 | 53641  | 0.0106991 | 0.0072625 | 0.0179616 | 2986429    | 6250                          | 5299                            | 11549                           |
| BRA  | 2012 | country | 2_Amr   | Brazil                           | 30649 | 20806 | 51455  | 0.0102939 | 0.006988  | 0.0172819 | 2977393    | 6051                          | 5233                            | 11284                           |
| BRA  | 2013 | country | 2_Amr   | Brazil                           | 29693 | 19941 | 49634  | 0.0099927 | 0.0067108 | 0.0167035 | 2971471    | 5867                          | 5089                            | 10956                           |
| BRA  | 2014 | country | 2_Amr   | Brazil                           | 28855 | 19165 | 48020  | 0.0097265 | 0.0064602 | 0.0161867 | 2966633    | 6061                          | 5055                            | 11116                           |
| BRA  | 2015 | country | 2_Amr   | Brazil                           | 27799 | 18701 | 46500  | 0.0093909 | 0.0063175 | 0.0157083 | 2960212    | 5903                          | 5219                            | 11122                           |
| BRA  | 2016 | country | 2_Amr   | Brazil                           | 28463 | 19823 | 48286  | 0.0096478 | 0.0067192 | 0.016367  | 2950207    | 7780                          | 6266                            | 14046                           |
| BRA  | 2017 | country | 2_Amr   | Brazil                           | 24969 | 18534 | 43503  | 0.0085057 | 0.0063136 | 0.0148193 | 2935563    | 5323                          | 5035                            | 10357                           |
| BRA  | 2018 | country | 2_Amr   | Brazil                           | 23728 | 18231 | 41959  | 0.0081381 | 0.0062528 | 0.0143909 | 2915671    | 5083                          | 4950                            | 10033                           |
| BRA  | 2019 | country | 2_Amr   | Brazil                           | 22736 | 17693 | 40429  | 0.0078661 | 0.0061214 | 0.0139875 | 2890368    | 4885                          | 4805                            | 9689                            |

| iso3 | year | level   | whoreg6 | whoname           | nnd | pnd | u5d | nmr       | pnmr      | u5mr      | Livebirths | Neonatal birth defects deaths | 1-59 month birth defects deaths | Under five birth defects deaths |
|------|------|---------|---------|-------------------|-----|-----|-----|-----------|-----------|-----------|------------|-------------------------------|---------------------------------|---------------------------------|
| BRB  | 2000 | country | 2_Amr   | Barbados          | 35  | 22  | 57  | 0.0092714 | 0.0058277 | 0.0150991 | 3775       | 3                             | 5                               | 8                               |
| BRB  | 2001 | country | 2_Amr   | Barbados          | 35  | 23  | 58  | 0.0093603 | 0.0061511 | 0.0155114 | 3739       | 2                             | 0                               | 2                               |
| BRB  | 2002 | country | 2_Amr   | Barbados          | 35  | 23  | 58  | 0.0094874 | 0.0062346 | 0.015722  | 3689       | 8                             | 7                               | 15                              |
| BRB  | 2003 | country | 2_Amr   | Barbados          | 36  | 22  | 58  | 0.0096369 | 0.0058892 | 0.0155261 | 3736       | 3                             | 3                               | 6                               |
| BRB  | 2004 | country | 2_Amr   | Barbados          | 36  | 22  | 58  | 0.00979   | 0.0059828 | 0.0157727 | 3677       | 5                             | 3                               | 8                               |
| BRB  | 2005 | country | 2_Amr   | Barbados          | 36  | 21  | 57  | 0.0099398 | 0.0057982 | 0.0157381 | 3622       | 12                            | 3                               | 15                              |
| BRB  | 2006 | country | 2_Amr   | Barbados          | 36  | 20  | 56  | 0.0100345 | 0.0055747 | 0.0156092 | 3588       | 3                             | 4                               | 7                               |
| BRB  | 2007 | country | 2_Amr   | Barbados          | 35  | 20  | 55  | 0.010076  | 0.0057577 | 0.0158337 | 3474       | 2                             | 0                               | 2                               |
| BRB  | 2008 | country | 2_Amr   | Barbados          | 35  | 18  | 53  | 0.0100646 | 0.0051761 | 0.0152407 | 3478       | 11                            | 5                               | 16                              |
| BRB  | 2009 | country | 2_Amr   | Barbados          | 34  | 18  | 52  | 0.0100224 | 0.005306  | 0.0153283 | 3392       | 8                             | 0                               | 8                               |
| BRB  | 2010 | country | 2_Amr   | Barbados          | 33  | 17  | 50  | 0.0099591 | 0.0051305 | 0.0150896 | 3314       | 9                             | 2                               | 11                              |
| BRB  | 2011 | country | 2_Amr   | Barbados          | 32  | 17  | 49  | 0.0098873 | 0.0052527 | 0.01514   | 3236       | 6                             | 1                               | 7                               |
| BRB  | 2012 | country | 2_Amr   | Barbados          | 31  | 16  | 47  | 0.0097986 | 0.0050573 | 0.0148559 | 3164       | 9                             | 2                               | 11                              |
| BRB  | 2013 | country | 2_Amr   | Barbados          | 30  | 16  | 46  | 0.0096831 | 0.0051643 | 0.0148474 | 3098       | 10                            | 7                               | 18                              |
| BRB  | 2014 | country | 2_Amr   | Barbados          | 30  | 15  | 45  | 0.0095324 | 0.0047662 | 0.0142986 | 3147       | 8                             | 3                               | 11                              |
| BRB  | 2015 | country | 2_Amr   | Barbados          | 29  | 14  | 43  | 0.0093386 | 0.0045083 | 0.0138469 | 3105       | 9                             | 3                               | 12                              |
| BRB  | 2016 | country | 2_Amr   | Barbados          | 28  | 14  | 42  | 0.0091009 | 0.0045505 | 0.0136514 | 3077       | 9                             | 3                               | 12                              |
| BRB  | 2017 | country | 2_Amr   | Barbados          | 27  | 14  | 41  | 0.0088618 | 0.004595  | 0.0134569 | 3047       | 8                             | 3                               | 11                              |
| BRB  | 2018 | country | 2_Amr   | Barbados          | 26  | 14  | 40  | 0.0086132 | 0.0046379 | 0.013251  | 3019       | 8                             | 3                               | 11                              |
| BRB  | 2019 | country | 2_Amr   | Barbados          | 26  | 13  | 39  | 0.0083706 | 0.0041853 | 0.0125559 | 3106       | 8                             | 3                               | 11                              |
| BRN  | 2000 | country | 6_Wpr   | Brunei Darussalam | 38  | 40  | 78  | 0.0049635 | 0.0052247 | 0.0101882 | 7656       | 14                            | 13                              | 27                              |
| BRN  | 2001 | country | 6_Wpr   | Brunei Darussalam | 37  | 39  | 76  | 0.0049729 | 0.0052417 | 0.0102145 | 7440       | 14                            | 16                              | 30                              |
| BRN  | 2002 | country | 6_Wpr   | Brunei Darussalam | 37  | 37  | 74  | 0.0049864 | 0.0049864 | 0.0099728 | 7420       | 14                            | 16                              | 30                              |
| BRN  | 2003 | country | 6_Wpr   | Brunei Darussalam | 37  | 34  | 71  | 0.0051274 | 0.0047116 | 0.009839  | 7216       | 14                            | 8                               | 22                              |
| BRN  | 2004 | country | 6_Wpr   | Brunei Darussalam | 36  | 33  | 69  | 0.0051052 | 0.0046798 | 0.009785  | 7052       | 13                            | 7                               | 20                              |
| BRN  | 2005 | country | 6_Wpr   | Brunei Darussalam | 35  | 32  | 67  | 0.0050607 | 0.004627  | 0.0096877 | 6916       | 13                            | 12                              | 25                              |
| BRN  | 2006 | country | 6_Wpr   | Brunei Darussalam | 34  | 32  | 66  | 0.0050105 | 0.0047157 | 0.0097262 | 6786       | 12                            | 4                               | 16                              |
| BRN  | 2007 | country | 6_Wpr   | Brunei Darussalam | 33  | 32  | 65  | 0.0048233 | 0.0046771 | 0.0095004 | 6842       | 12                            | 11                              | 23                              |
| BRN  | 2008 | country | 6_Wpr   | Brunei Darussalam | 32  | 32  | 64  | 0.0048018 | 0.0048018 | 0.0096036 | 6664       | 12                            | 9                               | 21                              |
| BRN  | 2009 | country | 6_Wpr   | Brunei Darussalam | 32  | 32  | 64  | 0.0047963 | 0.0047963 | 0.0095925 | 6672       | 11                            | 7                               | 19                              |
| BRN  | 2010 | country | 6_Wpr   | Brunei Darussalam | 33  | 32  | 65  | 0.0049433 | 0.0047935 | 0.0097369 | 6676       | 12                            | 10                              | 22                              |
| BRN  | 2011 | country | 6_Wpr   | Brunei Darussalam | 33  | 34  | 67  | 0.0048066 | 0.0049522 | 0.0097588 | 6866       | 15                            | 9                               | 24                              |
| BRN  | 2012 | country | 6_Wpr   | Brunei Darussalam | 34  | 34  | 68  | 0.0049663 | 0.0049663 | 0.0099326 | 6846       | 8                             | 1                               | 9                               |
| BRN  | 2013 | country | 6_Wpr   | Brunei Darussalam | 34  | 36  | 70  | 0.0048712 | 0.0051577 | 0.0100289 | 6980       | 12                            | 7                               | 19                              |
| BRN  | 2014 | country | 6_Wpr   | Brunei Darussalam | 34  | 37  | 71  | 0.0049583 | 0.0053958 | 0.0103541 | 6857       | 10                            | 12                              | 21                              |
| BRN  | 2015 | country | 6_Wpr   | Brunei Darussalam | 35  | 37  | 72  | 0.0050915 | 0.0053824 | 0.010474  | 6874       | 16                            | 13                              | 28                              |
| BRN  | 2016 | country | 6_Wpr   | Brunei Darussalam | 36  | 37  | 73  | 0.0054054 | 0.0055555 | 0.0109609 | 6660       | 9                             | 7                               | 16                              |
| BRN  | 2017 | country | 6_Wpr   | Brunei Darussalam | 36  | 37  | 73  | 0.0055922 | 0.0057476 | 0.0113398 | 6437       | 12                            | 10                              | 22                              |
| BRN  | 2018 | country | 6_Wpr   | Brunei Darussalam | 37  | 36  | 73  | 0.0057577 | 0.0056021 | 0.0113598 | 6426       | 12                            | 10                              | 23                              |
| BRN  | 2019 | country | 6_Wpr   | Brunei Darussalam | 38  | 35  | 73  | 0.0060305 | 0.0055544 | 0.0115849 | 6301       | 11                            | 10                              | 21                              |

| iso3 | year | level   | whoreg6 | whoname  | nnd  | pnd  | u5d  | nmr       | pnmr      | u5mr      | Livebirths | Neonatal birth defects deaths | 1-59 month birth defects deaths | Under five birth defects deaths |
|------|------|---------|---------|----------|------|------|------|-----------|-----------|-----------|------------|-------------------------------|---------------------------------|---------------------------------|
| BTN  | 2000 | country | 3_Sear  | Bhutan   | 505  | 765  | 1270 | 0.0316704 | 0.0479852 | 0.0796557 | 15945      | 29                            | 34                              | 63                              |
| BTN  | 2001 | country | 3_Sear  | Bhutan   | 480  | 712  | 1192 | 0.0306891 | 0.045534  | 0.0762231 | 15641      | 29                            | 33                              | 62                              |
| BTN  | 2002 | country | 3_Sear  | Bhutan   | 456  | 621  | 1077 | 0.0297077 | 0.0404728 | 0.0701805 | 15350      | 29                            | 32                              | 61                              |
| BTN  | 2003 | country | 3_Sear  | Bhutan   | 432  | 560  | 992  | 0.028686  | 0.0371896 | 0.0658756 | 15060      | 29                            | 39                              | 68                              |
| BTN  | 2004 | country | 3_Sear  | Bhutan   | 410  | 508  | 918  | 0.0277181 | 0.0343471 | 0.0620653 | 14792      | 28                            | 37                              | 65                              |
| BTN  | 2005 | country | 3_Sear  | Bhutan   | 389  | 459  | 848  | 0.0267568 | 0.0315781 | 0.0583349 | 14538      | 28                            | 41                              | 69                              |
| BTN  | 2006 | country | 3_Sear  | Bhutan   | 369  | 414  | 783  | 0.0257779 | 0.0288879 | 0.0546658 | 14315      | 28                            | 36                              | 64                              |
| BTN  | 2007 | country | 3_Sear  | Bhutan   | 350  | 370  | 720  | 0.024898  | 0.0263208 | 0.0512188 | 14057      | 28                            | 39                              | 67                              |
| BTN  | 2008 | country | 3_Sear  | Bhutan   | 332  | 333  | 665  | 0.0240251 | 0.0240975 | 0.0481226 | 13819      | 27                            | 40                              | 67                              |
| BTN  | 2009 | country | 3_Sear  | Bhutan   | 314  | 297  | 611  | 0.0231223 | 0.0219066 | 0.0450289 | 13580      | 27                            | 33                              | 60                              |
| BTN  | 2010 | country | 3_Sear  | Bhutan   | 297  | 271  | 568  | 0.022237  | 0.0202759 | 0.0425129 | 13356      | 26                            | 32                              | 59                              |
| BTN  | 2011 | country | 3_Sear  | Bhutan   | 281  | 248  | 529  | 0.0213634 | 0.0188238 | 0.0401871 | 13153      | 26                            | 31                              | 56                              |
| BTN  | 2012 | country | 3_Sear  | Bhutan   | 268  | 228  | 496  | 0.0205827 | 0.0175281 | 0.0381108 | 13021      | 25                            | 30                              | 55                              |
| BTN  | 2013 | country | 3_Sear  | Bhutan   | 258  | 213  | 471  | 0.0198893 | 0.0164041 | 0.0362933 | 12972      | 25                            | 29                              | 54                              |
| BTN  | 2014 | country | 3_Sear  | Bhutan   | 249  | 199  | 448  | 0.0192216 | 0.0153742 | 0.0345958 | 12954      | 27                            | 29                              | 56                              |
| BTN  | 2015 | country | 3_Sear  | Bhutan   | 242  | 187  | 429  | 0.018655  | 0.0143866 | 0.0330416 | 12972      | 29                            | 27                              | 55                              |
| BTN  | 2016 | country | 3_Sear  | Bhutan   | 236  | 175  | 411  | 0.0181246 | 0.0134424 | 0.031567  | 13021      | 30                            | 25                              | 55                              |
| BTN  | 2017 | country | 3_Sear  | Bhutan   | 229  | 169  | 398  | 0.0176093 | 0.0130155 | 0.0306247 | 13005      | 32                            | 25                              | 56                              |
| BTN  | 2018 | country | 3_Sear  | Bhutan   | 223  | 161  | 384  | 0.0171062 | 0.0123525 | 0.0294587 | 13036      | 32                            | 24                              | 56                              |
| BTN  | 2019 | country | 3_Sear  | Bhutan   | 215  | 155  | 370  | 0.0165691 | 0.0119142 | 0.0284832 | 12976      | 32                            | 24                              | 55                              |
| BWA  | 2000 | country | 1_Afr   | Botswana | 278  | 3528 | 3806 | 0.0057812 | 0.0733648 | 0.079146  | 48087      | 25                            | 106                             | 131                             |
| BWA  | 2001 | country | 1_Afr   | Botswana | 272  | 2857 | 3129 | 0.0055716 | 0.0585184 | 0.0640899 | 48819      | 25                            | 110                             | 135                             |
| BWA  | 2002 | country | 1_Afr   | Botswana | 276  | 2654 | 2930 | 0.0055704 | 0.0535707 | 0.0591411 | 49547      | 26                            | 117                             | 143                             |
| BWA  | 2003 | country | 1_Afr   | Botswana | 286  | 2505 | 2791 | 0.0056808 | 0.0497564 | 0.0554372 | 50345      | 29                            | 120                             | 149                             |
| BWA  | 2004 | country | 1_Afr   | Botswana | 304  | 2311 | 2615 | 0.0059557 | 0.0452774 | 0.0512331 | 51044      | 33                            | 123                             | 156                             |
| BWA  | 2005 | country | 1_Afr   | Botswana | 329  | 1989 | 2318 | 0.0063529 | 0.0383975 | 0.0447504 | 51787      | 39                            | 122                             | 162                             |
| BWA  | 2006 | country | 1_Afr   | Botswana | 361  | 1668 | 2029 | 0.0068814 | 0.0317989 | 0.0386804 | 52460      | 45                            | 121                             | 166                             |
| BWA  | 2007 | country | 1_Afr   | Botswana | 401  | 1533 | 1934 | 0.007547  | 0.0288605 | 0.0364076 | 53133      | 54                            | 121                             | 175                             |
| BWA  | 2008 | country | 1_Afr   | Botswana | 449  | 1486 | 1935 | 0.0083406 | 0.0276073 | 0.0359479 | 53833      | 61                            | 119                             | 180                             |
| BWA  | 2009 | country | 1_Afr   | Botswana | 508  | 1417 | 1925 | 0.0093254 | 0.0260045 | 0.0353299 | 54475      | 70                            | 120                             | 191                             |
| BWA  | 2010 | country | 1_Afr   | Botswana | 578  | 1402 | 1980 | 0.0104835 | 0.0254248 | 0.0359083 | 55134      | 81                            | 121                             | 201                             |
| BWA  | 2011 | country | 1_Afr   | Botswana | 660  | 1407 | 2067 | 0.0118573 | 0.0252715 | 0.0371288 | 55662      | 88                            | 127                             | 214                             |
| BWA  | 2012 | country | 1_Afr   | Botswana | 752  | 1336 | 2088 | 0.0134045 | 0.0238115 | 0.037216  | 56101      | 95                            | 139                             | 234                             |
| BWA  | 2013 | country | 1_Afr   | Botswana | 847  | 1254 | 2101 | 0.0150214 | 0.0222336 | 0.0372551 | 56386      | 101                           | 148                             | 248                             |
| BWA  | 2014 | country | 1_Afr   | Botswana | 915  | 1262 | 2177 | 0.0161795 | 0.0223218 | 0.0385013 | 56553      | 104                           | 160                             | 264                             |
| BWA  | 2015 | country | 1_Afr   | Botswana | 963  | 1356 | 2319 | 0.0170164 | 0.023967  | 0.0409834 | 56593      | 103                           | 166                             | 270                             |
| BWA  | 2016 | country | 1_Afr   | Botswana | 990  | 1472 | 2462 | 0.0175265 | 0.0260625 | 0.0435891 | 56486      | 103                           | 168                             | 270                             |
| BWA  | 2017 | country | 1_Afr   | Botswana | 1004 | 1457 | 2461 | 0.0178353 | 0.0258825 | 0.0437178 | 56293      | 104                           | 170                             | 274                             |
| BWA  | 2018 | country | 1_Afr   | Botswana | 1007 | 1401 | 2408 | 0.0179668 | 0.0249901 | 0.0429569 | 56048      | 102                           | 171                             | 273                             |
| BWA  | 2019 | country | 1_Afr   | Botswana | 999  | 1321 | 2320 | 0.0179206 | 0.023699  | 0.0416196 | 55746      | 101                           | 174                             | 275                             |

| iso3 | year | level   | whoreg6 | whoname             | nnd  | pnd   | u5d   | nmr       | pnmr      | u5mr      | Livebirths | Neonatal birth defects deaths | 1-59 month birth defects deaths | Under five birth defects deaths |
|------|------|---------|---------|---------------------|------|-------|-------|-----------|-----------|-----------|------------|-------------------------------|---------------------------------|---------------------------------|
| CAF  | 2000 | country | 1_Afr   | Central African Rep | 7426 | 17878 | 25304 | 0.0493981 | 0.1189267 | 0.1683248 | 150330     | 262                           | 17                              | 279                             |
| CAF  | 2001 | country | 1_Afr   | Central African Rep | 7562 | 18001 | 25563 | 0.0492647 | 0.1172738 | 0.1665385 | 153497     | 267                           | 17                              | 284                             |
| CAF  | 2002 | country | 1_Afr   | Central African Rep | 7689 | 18299 | 25988 | 0.0491219 | 0.1169072 | 0.1660291 | 156529     | 275                           | 20                              | 295                             |
| CAF  | 2003 | country | 1_Afr   | Central African Rep | 7811 | 18164 | 25975 | 0.0490078 | 0.1139651 | 0.1629729 | 159383     | 282                           | 23                              | 305                             |
| CAF  | 2004 | country | 1_Afr   | Central African Rep | 7905 | 18980 | 26885 | 0.0488019 | 0.117176  | 0.1659779 | 161982     | 285                           | 24                              | 309                             |
| CAF  | 2005 | country | 1_Afr   | Central African Rep | 7999 | 18275 | 26274 | 0.0487041 | 0.1112708 | 0.1599749 | 164237     | 291                           | 28                              | 319                             |
| CAF  | 2006 | country | 1_Afr   | Central African Rep | 8057 | 17337 | 25394 | 0.0485218 | 0.1044068 | 0.1529287 | 166049     | 297                           | 18                              | 315                             |
| CAF  | 2007 | country | 1_Afr   | Central African Rep | 8089 | 17269 | 25358 | 0.0483241 | 0.1031645 | 0.1514885 | 167391     | 298                           | 18                              | 316                             |
| CAF  | 2008 | country | 1_Afr   | Central African Rep | 8075 | 17094 | 25169 | 0.047992  | 0.1015954 | 0.1495873 | 168257     | 307                           | 32                              | 339                             |
| CAF  | 2009 | country | 1_Afr   | Central African Rep | 7996 | 16595 | 24591 | 0.0473993 | 0.0983749 | 0.1457742 | 168694     | 308                           | 25                              | 332                             |
| CAF  | 2010 | country | 1_Afr   | Central African Rep | 7896 | 16257 | 24153 | 0.0468078 | 0.0963722 | 0.14318   | 168690     | 307                           | 27                              | 335                             |
| CAF  | 2011 | country | 1_Afr   | Central African Rep | 7756 | 16538 | 24294 | 0.0460936 | 0.0982824 | 0.1443759 | 168266     | 301                           | 29                              | 330                             |
| CAF  | 2012 | country | 1_Afr   | Central African Rep | 7580 | 15317 | 22897 | 0.0452324 | 0.0914026 | 0.136635  | 167579     | 298                           | 32                              | 330                             |
| CAF  | 2013 | country | 1_Afr   | Central African Rep | 7415 | 15503 | 22918 | 0.0444672 | 0.0929707 | 0.1374379 | 166752     | 289                           | 18                              | 307                             |
| CAF  | 2014 | country | 1_Afr   | Central African Rep | 7251 | 14230 | 21481 | 0.0436968 | 0.0857569 | 0.1294537 | 165939     | 289                           | 37                              | 325                             |
| CAF  | 2015 | country | 1_Afr   | Central African Rep | 7091 | 13674 | 20765 | 0.0428934 | 0.0827125 | 0.1256059 | 165317     | 280                           | 40                              | 319                             |
| CAF  | 2016 | country | 1_Afr   | Central African Rep | 6954 | 13181 | 20135 | 0.0421243 | 0.0798453 | 0.1219696 | 165083     | 278                           | 43                              | 321                             |
| CAF  | 2017 | country | 1_Afr   | Central African Rep | 6846 | 12534 | 19380 | 0.0414175 | 0.0758292 | 0.1172467 | 165293     | 278                           | 67                              | 346                             |
| CAF  | 2018 | country | 1_Afr   | Central African Rep | 6752 | 12106 | 18858 | 0.0406683 | 0.0729152 | 0.1135835 | 166026     | 271                           | 47                              | 318                             |
| CAF  | 2019 | country | 1_Afr   | Central African Rep | 6646 | 12800 | 19446 | 0.0397348 | 0.0765294 | 0.1162642 | 167259     | 270                           | 48                              | 317                             |
| CAN  | 2000 | country | 2_Amr   | Canada              | 1240 | 849   | 2089  | 0.0037314 | 0.0025548 | 0.0062862 | 332315     | 375                           | 255                             | 631                             |
| CAN  | 2001 | country | 2_Amr   | Canada              | 1249 | 805   | 2054  | 0.0037779 | 0.0024349 | 0.0062128 | 330607     | 377                           | 241                             | 618                             |
| CAN  | 2002 | country | 2_Amr   | Canada              | 1276 | 765   | 2041  | 0.0038462 | 0.0023059 | 0.006152  | 331760     | 386                           | 229                             | 615                             |
| CAN  | 2003 | country | 2_Amr   | Canada              | 1308 | 736   | 2044  | 0.0039018 | 0.0021955 | 0.0060974 | 335227     | 397                           | 221                             | 617                             |
| CAN  | 2004 | country | 2_Amr   | Canada              | 1332 | 725   | 2057  | 0.00391   | 0.0021282 | 0.0060382 | 340666     | 401                           | 217                             | 618                             |
| CAN  | 2005 | country | 2_Amr   | Canada              | 1347 | 727   | 2074  | 0.0038745 | 0.0020912 | 0.0059657 | 347653     | 401                           | 218                             | 619                             |
| CAN  | 2006 | country | 2_Amr   | Canada              | 1360 | 731   | 2091  | 0.00383   | 0.0020586 | 0.0058886 | 355093     | 403                           | 219                             | 622                             |
| CAN  | 2007 | country | 2_Amr   | Canada              | 1374 | 731   | 2105  | 0.003787  | 0.0020148 | 0.0058018 | 362818     | 412                           | 219                             | 631                             |
| CAN  | 2008 | country | 2_Amr   | Canada              | 1389 | 725   | 2114  | 0.003759  | 0.001962  | 0.005721  | 369517     | 416                           | 217                             | 633                             |
| CAN  | 2009 | country | 2_Amr   | Canada              | 1406 | 712   | 2118  | 0.0037498 | 0.0018989 | 0.0056487 | 374953     | 415                           | 213                             | 628                             |
| CAN  | 2010 | country | 2_Amr   | Canada              | 1420 | 698   | 2118  | 0.0037475 | 0.0018421 | 0.0055895 | 378922     | 419                           | 209                             | 629                             |
| CAN  | 2011 | country | 2_Amr   | Canada              | 1422 | 690   | 2112  | 0.0037253 | 0.0018077 | 0.0055533 | 381710     | 416                           | 207                             | 623                             |
| CAN  | 2012 | country | 2_Amr   | Canada              | 1411 | 692   | 2103  | 0.0036792 | 0.0018044 | 0.0054837 | 383503     | 417                           | 207                             | 624                             |
| CAN  | 2013 | country | 2_Amr   | Canada              | 1392 | 695   | 2087  | 0.003619  | 0.0018069 | 0.0054258 | 384640     | 413                           | 208                             | 621                             |
| CAN  | 2014 | country | 2_Amr   | Canada              | 1374 | 690   | 2064  | 0.0035681 | 0.0017918 | 0.0053599 | 385080     | 408                           | 207                             | 615                             |
| CAN  | 2015 | country | 2_Amr   | Canada              | 1357 | 677   | 2034  | 0.0035182 | 0.0017552 | 0.0052734 | 385707     | 400                           | 203                             | 603                             |
| CAN  | 2016 | country | 2_Amr   | Canada              | 1343 | 656   | 1999  | 0.0034797 | 0.0016997 | 0.0051794 | 385951     | 398                           | 197                             | 595                             |
| CAN  | 2017 | country | 2_Amr   | Canada              | 1328 | 632   | 1960  | 0.0034411 | 0.0016376 | 0.0050787 | 385924     | 391                           | 189                             | 580                             |
| CAN  | 2018 | country | 2_Amr   | Canada              | 1310 | 608   | 1918  | 0.0033925 | 0.0015745 | 0.004967  | 386148     | 381                           | 182                             | 563                             |
| CAN  | 2019 | country | 2_Amr   | Canada              | 1285 | 588   | 1873  | 0.003326  | 0.0015219 | 0.004848  | 386348     | 381                           | 176                             | 557                             |

| iso3 | year | level   | whoreg6 | whoname     | nnd  | pnd  | u5d  | nmr       | pnmr      | u5mr      | Livebirths | Neonatal birth defects deaths | 1-59 month birth defects deaths | Under five birth defects deaths |
|------|------|---------|---------|-------------|------|------|------|-----------|-----------|-----------|------------|-------------------------------|---------------------------------|---------------------------------|
| CHE  | 2000 | country | 4_Eur   | Switzerland | 264  | 171  | 435  | 0.003478  | 0.0022528 | 0.0057308 | 75905      | 79                            | 51                              | 130                             |
| CHE  | 2001 | country | 4_Eur   | Switzerland | 259  | 162  | 421  | 0.0034655 | 0.0021676 | 0.0056331 | 74736      | 77                            | 47                              | 124                             |
| CHE  | 2002 | country | 4_Eur   | Switzerland | 254  | 153  | 407  | 0.0034332 | 0.002068  | 0.0055012 | 73983      | 76                            | 48                              | 124                             |
| CHE  | 2003 | country | 4_Eur   | Switzerland | 248  | 146  | 394  | 0.0033664 | 0.0019818 | 0.0053482 | 73670      | 75                            | 48                              | 123                             |
| CHE  | 2004 | country | 4_Eur   | Switzerland | 244  | 139  | 383  | 0.0033224 | 0.0018927 | 0.0052151 | 73440      | 74                            | 48                              | 122                             |
| CHE  | 2005 | country | 4_Eur   | Switzerland | 243  | 130  | 373  | 0.0032935 | 0.001762  | 0.0050555 | 73781      | 72                            | 50                              | 122                             |
| CHE  | 2006 | country | 4_Eur   | Switzerland | 243  | 124  | 367  | 0.0032596 | 0.0016633 | 0.0049229 | 74549      | 73                            | 37                              | 111                             |
| CHE  | 2007 | country | 4_Eur   | Switzerland | 246  | 116  | 362  | 0.0032457 | 0.0015305 | 0.0047761 | 75793      | 74                            | 42                              | 117                             |
| CHE  | 2008 | country | 4_Eur   | Switzerland | 249  | 110  | 359  | 0.0032356 | 0.0014294 | 0.0046649 | 76957      | 75                            | 34                              | 110                             |
| CHE  | 2009 | country | 4_Eur   | Switzerland | 250  | 108  | 358  | 0.0031879 | 0.0013772 | 0.0045651 | 78422      | 75                            | 31                              | 106                             |
| CHE  | 2010 | country | 4_Eur   | Switzerland | 251  | 107  | 358  | 0.0031478 | 0.0013419 | 0.0044897 | 79739      | 76                            | 42                              | 118                             |
| CHE  | 2011 | country | 4_Eur   | Switzerland | 252  | 107  | 359  | 0.0031054 | 0.0013185 | 0.0044239 | 81150      | 78                            | 43                              | 121                             |
| CHE  | 2012 | country | 4_Eur   | Switzerland | 253  | 108  | 361  | 0.0030687 | 0.00131   | 0.0043787 | 82445      | 77                            | 40                              | 117                             |
| CHE  | 2013 | country | 4_Eur   | Switzerland | 255  | 109  | 364  | 0.0030479 | 0.0013028 | 0.0043508 | 83663      | 78                            | 44                              | 122                             |
| CHE  | 2014 | country | 4_Eur   | Switzerland | 256  | 109  | 365  | 0.0030159 | 0.0012841 | 0.0043    | 84883      | 77                            | 34                              | 111                             |
| CHE  | 2015 | country | 4_Eur   | Switzerland | 256  | 110  | 366  | 0.0029856 | 0.0012829 | 0.0042685 | 85744      | 77                            | 44                              | 121                             |
| CHE  | 2016 | country | 4_Eur   | Switzerland | 255  | 110  | 365  | 0.0029449 | 0.0012703 | 0.0042152 | 86590      | 76                            | 52                              | 128                             |
| CHE  | 2017 | country | 4_Eur   | Switzerland | 253  | 109  | 362  | 0.0029029 | 0.0012506 | 0.0041535 | 87155      | 76                            | 43                              | 119                             |
| CHE  | 2018 | country | 4_Eur   | Switzerland | 249  | 109  | 358  | 0.0028418 | 0.001244  | 0.0040858 | 87620      | 75                            | 43                              | 117                             |
| CHE  | 2019 | country | 4_Eur   | Switzerland | 244  | 109  | 353  | 0.0027672 | 0.0012362 | 0.0040033 | 88177      | 73                            | 43                              | 115                             |
| CHL  | 2000 | country | 2_Amr   | Chile       | 1450 | 1364 | 2814 | 0.0057086 | 0.00537   | 0.0110786 | 254004     | 555                           | 387                             | 942                             |
| CHL  | 2001 | country | 2_Amr   | Chile       | 1356 | 1243 | 2599 | 0.0054304 | 0.0049779 | 0.0104083 | 249704     | 482                           | 366                             | 848                             |
| CHL  | 2002 | country | 2_Amr   | Chile       | 1308 | 1137 | 2445 | 0.0053053 | 0.0046117 | 0.009917  | 246547     | 511                           | 397                             | 908                             |
| CHL  | 2003 | country | 2_Amr   | Chile       | 1300 | 1044 | 2344 | 0.0053146 | 0.0042681 | 0.0095827 | 244608     | 526                           | 351                             | 878                             |
| CHL  | 2004 | country | 2_Amr   | Chile       | 1311 | 961  | 2272 | 0.0053833 | 0.0039461 | 0.0093294 | 243531     | 494                           | 341                             | 834                             |
| CHL  | 2005 | country | 2_Amr   | Chile       | 1327 | 891  | 2218 | 0.0054483 | 0.0036582 | 0.0091066 | 243560     | 487                           | 333                             | 819                             |
| CHL  | 2006 | country | 2_Amr   | Chile       | 1336 | 849  | 2185 | 0.0054683 | 0.003475  | 0.0089434 | 244315     | 499                           | 284                             | 783                             |
| CHL  | 2007 | country | 2_Amr   | Chile       | 1331 | 847  | 2178 | 0.0054206 | 0.0034495 | 0.0088701 | 245543     | 476                           | 304                             | 780                             |
| CHL  | 2008 | country | 2_Amr   | Chile       | 1320 | 863  | 2183 | 0.0053412 | 0.003492  | 0.0088332 | 247135     | 476                           | 292                             | 768                             |
| CHL  | 2009 | country | 2_Amr   | Chile       | 1316 | 865  | 2181 | 0.005294  | 0.0034797 | 0.0087737 | 248583     | 508                           | 316                             | 824                             |
| CHL  | 2010 | country | 2_Amr   | Chile       | 1324 | 835  | 2159 | 0.0053091 | 0.0033483 | 0.0086574 | 249382     | 483                           | 305                             | 788                             |
| CHL  | 2011 | country | 2_Amr   | Chile       | 1330 | 796  | 2126 | 0.0053318 | 0.0031911 | 0.0085229 | 249445     | 507                           | 345                             | 851                             |
| CHL  | 2012 | country | 2_Amr   | Chile       | 1321 | 768  | 2089 | 0.0053139 | 0.0030894 | 0.0084033 | 248593     | 513                           | 314                             | 827                             |
| CHL  | 2013 | country | 2_Amr   | Chile       | 1298 | 749  | 2047 | 0.0052576 | 0.0030338 | 0.0082914 | 246882     | 541                           | 292                             | 833                             |
| CHL  | 2014 | country | 2_Amr   | Chile       | 1267 | 724  | 1991 | 0.0051845 | 0.0029626 | 0.0081471 | 244382     | 486                           | 290                             | 775                             |
| CHL  | 2015 | country | 2_Amr   | Chile       | 1230 | 690  | 1920 | 0.0050998 | 0.0028609 | 0.0079607 | 241186     | 463                           | 277                             | 740                             |
| CHL  | 2016 | country | 2_Amr   | Chile       | 1188 | 652  | 1840 | 0.0049974 | 0.0027427 | 0.0077401 | 237722     | 514                           | 274                             | 788                             |
| CHL  | 2017 | country | 2_Amr   | Chile       | 1141 | 619  | 1760 | 0.0048656 | 0.0026396 | 0.0075052 | 234503     | 454                           | 252                             | 706                             |
| CHL  | 2018 | country | 2_Amr   | Chile       | 1092 | 591  | 1683 | 0.0047152 | 0.0025519 | 0.0072672 | 231589     | 440                           | 241                             | 680                             |
| CHL  | 2019 | country | 2_Amr   | Chile       | 1044 | 568  | 1612 | 0.0045556 | 0.0024785 | 0.0070341 | 229170     | 429                           | 231                             | 660                             |

| iso3 | year | level   | whoreg6 | whoname       | nnd    | pnd    | u5d    | nmr       | pnmr      | u5mr      | Livebirths | Neonatal birth defects deaths | 1-59 month birth defects deaths | Under five birth defects deaths |
|------|------|---------|---------|---------------|--------|--------|--------|-----------|-----------|-----------|------------|-------------------------------|---------------------------------|---------------------------------|
| CHN  | 2000 | country | 6_Wpr   | China         | 368525 | 283613 | 652138 | 0.0209709 | 0.016139  | 0.0371099 | 17600000   | 44205                         | 35785                           | 79990                           |
| CHN  | 2001 | country | 6_Wpr   | China         | 343637 | 254109 | 597746 | 0.019791  | 0.0146348 | 0.0344259 | 17400000   | 43905                         | 36514                           | 80419                           |
| CHN  | 2002 | country | 6_Wpr   | China         | 319321 | 225298 | 544619 | 0.018556  | 0.0130922 | 0.0316482 | 17200000   | 43189                         | 35544                           | 78733                           |
| CHN  | 2003 | country | 6_Wpr   | China         | 294328 | 200324 | 494652 | 0.0171971 | 0.0117046 | 0.0289017 | 17100000   | 41510                         | 32731                           | 74242                           |
| CHN  | 2004 | country | 6_Wpr   | China         | 265423 | 183671 | 449094 | 0.0155434 | 0.010756  | 0.0262994 | 17100000   | 40258                         | 31984                           | 72242                           |
| CHN  | 2005 | country | 6_Wpr   | China         | 239226 | 169557 | 408783 | 0.014001  | 0.0099235 | 0.0239245 | 17100000   | 39154                         | 30623                           | 69777                           |
| CHN  | 2006 | country | 6_Wpr   | China         | 215662 | 158053 | 373715 | 0.0125826 | 0.0092214 | 0.021804  | 17100000   | 37082                         | 30332                           | 67414                           |
| CHN  | 2007 | country | 6_Wpr   | China         | 195041 | 148686 | 343727 | 0.0113235 | 0.0086323 | 0.0199558 | 17200000   | 34420                         | 30125                           | 64545                           |
| CHN  | 2008 | country | 6_Wpr   | China         | 176975 | 140990 | 317965 | 0.0102146 | 0.0081376 | 0.0183523 | 17300000   | 31220                         | 28172                           | 59392                           |
| CHN  | 2009 | country | 6_Wpr   | China         | 160947 | 134210 | 295157 | 0.009235  | 0.0077008 | 0.0169358 | 17400000   | 28561                         | 28071                           | 56632                           |
| CHN  | 2010 | country | 6_Wpr   | China         | 147011 | 127267 | 274278 | 0.0083927 | 0.0072655 | 0.0156582 | 17500000   | 26618                         | 27815                           | 54433                           |
| CHN  | 2011 | country | 6_Wpr   | China         | 134420 | 120637 | 255057 | 0.0076464 | 0.0068623 | 0.0145087 | 17600000   | 24923                         | 26523                           | 51445                           |
| CHN  | 2012 | country | 6_Wpr   | China         | 123143 | 113646 | 236789 | 0.0069924 | 0.0064532 | 0.0134456 | 17600000   | 23176                         | 24872                           | 48048                           |
| CHN  | 2013 | country | 6_Wpr   | China         | 112714 | 106806 | 219520 | 0.0064024 | 0.0060668 | 0.0124692 | 17600000   | 21176                         | 23182                           | 44358                           |
| CHN  | 2014 | country | 6_Wpr   | China         | 103120 | 99816  | 202936 | 0.005874  | 0.0056858 | 0.0115598 | 17600000   | 19022                         | 21386                           | 40408                           |
| CHN  | 2015 | country | 6_Wpr   | China         | 93912  | 93254  | 187166 | 0.0053808 | 0.0053431 | 0.0107239 | 17500000   | 16901                         | 20197                           | 37098                           |
| CHN  | 2016 | country | 6_Wpr   | China         | 85305  | 86815  | 172120 | 0.0049327 | 0.00502   | 0.0099528 | 17300000   | 15352                         | 18850                           | 34202                           |
| CHN  | 2017 | country | 6_Wpr   | China         | 77398  | 80323  | 157721 | 0.0045307 | 0.0047019 | 0.0092326 | 17100000   | 13929                         | 17507                           | 31435                           |
| CHN  | 2018 | country | 6_Wpr   | China         | 70170  | 74162  | 144332 | 0.0041691 | 0.0044063 | 0.0085755 | 16800000   | 12628                         | 16184                           | 28812                           |
| CHN  | 2019 | country | 6_Wpr   | China         | 63895  | 68361  | 132256 | 0.0038615 | 0.0041314 | 0.007993  | 16500000   | 11499                         | 14929                           | 26428                           |
| CIV  | 2000 | country | 1_Afr   | Côte d'Ivoire | 30334  | 62352  | 92686  | 0.0451165 | 0.0927379 | 0.1378544 | 672349     | 1405                          | 111                             | 1516                            |
| CIV  | 2001 | country | 1_Afr   | Côte d'Ivoire | 30504  | 62714  | 93218  | 0.0445905 | 0.0916748 | 0.1362653 | 684092     | 1412                          | 115                             | 1526                            |
| CIV  | 2002 | country | 1_Afr   | Côte d'Ivoire | 30610  | 62729  | 93339  | 0.0440801 | 0.0903329 | 0.134413  | 694418     | 1458                          | 116                             | 1574                            |
| CIV  | 2003 | country | 1_Afr   | Côte d'Ivoire | 30609  | 61663  | 92272  | 0.0435068 | 0.0876458 | 0.1311526 | 703546     | 1479                          | 121                             | 1600                            |
| CIV  | 2004 | country | 1_Afr   | Côte d'Ivoire | 30518  | 59881  | 90399  | 0.042874  | 0.0841252 | 0.1269992 | 711806     | 1483                          | 245                             | 1729                            |
| CIV  | 2005 | country | 1_Afr   | Côte d'Ivoire | 30400  | 57068  | 87468  | 0.0422419 | 0.0792979 | 0.1215397 | 719665     | 1513                          | 322                             | 1835                            |
| CIV  | 2006 | country | 1_Afr   | Côte d'Ivoire | 30258  | 54890  | 85148  | 0.0415819 | 0.0754319 | 0.1170138 | 727672     | 1498                          | 258                             | 1757                            |
| CIV  | 2007 | country | 1_Afr   | Côte d'Ivoire | 30113  | 53878  | 83991  | 0.0408936 | 0.0731664 | 0.1140601 | 736374     | 1536                          | 153                             | 1689                            |
| CIV  | 2008 | country | 1_Afr   | Côte d'Ivoire | 30007  | 52608  | 82615  | 0.040217  | 0.0705087 | 0.1107258 | 746127     | 1595                          | 215                             | 1810                            |
| CIV  | 2009 | country | 1_Afr   | Côte d'Ivoire | 29932  | 50645  | 80577  | 0.0395289 | 0.0668831 | 0.106412  | 757218     | 1603                          | 180                             | 1782                            |
| CIV  | 2010 | country | 1_Afr   | Côte d'Ivoire | 29892  | 49752  | 79644  | 0.0388304 | 0.0646286 | 0.103459  | 769810     | 1604                          | 246                             | 1850                            |
| CIV  | 2011 | country | 1_Afr   | Côte d'Ivoire | 29901  | 49141  | 79042  | 0.038148  | 0.062695  | 0.100843  | 783815     | 1660                          | 195                             | 1855                            |
| CIV  | 2012 | country | 1_Afr   | Côte d'Ivoire | 29958  | 47531  | 77489  | 0.037498  | 0.0594932 | 0.0969913 | 798923     | 1697                          | 766                             | 2463                            |
| CIV  | 2013 | country | 1_Afr   | Côte d'Ivoire | 30009  | 46611  | 76620  | 0.0368325 | 0.0572095 | 0.094042  | 814743     | 1718                          | 569                             | 2287                            |
| CIV  | 2014 | country | 1_Afr   | Côte d'Ivoire | 30080  | 45610  | 75690  | 0.0361969 | 0.0548847 | 0.0910816 | 831010     | 1773                          | 488                             | 2261                            |
| CIV  | 2015 | country | 1_Afr   | Côte d'Ivoire | 30142  | 44146  | 74288  | 0.0355642 | 0.0520874 | 0.0876515 | 847539     | 1823                          | 618                             | 2441                            |
| CIV  | 2016 | country | 1_Afr   | Côte d'Ivoire | 30175  | 43715  | 73890  | 0.0349222 | 0.0505919 | 0.0855141 | 864063     | 1829                          | 608                             | 2437                            |
| CIV  | 2017 | country | 1_Afr   | Côte d'Ivoire | 30182  | 43092  | 73274  | 0.0342793 | 0.0489418 | 0.0832212 | 880472     | 1889                          | 567                             | 2456                            |
| CIV  | 2018 | country | 1_Afr   | Côte d'Ivoire | 30190  | 42266  | 72456  | 0.0336684 | 0.0471353 | 0.0808037 | 896687     | 1901                          | 716                             | 2617                            |
| CIV  | 2019 | country | 1_Afr   | Côte d'Ivoire | 30156  | 40084  | 70240  | 0.0330441 | 0.0439233 | 0.0769674 | 912600     | 1886                          | 725                             | 2611                            |

| iso3 | year | level   | whoreg6 | whoname          | nnd   | pnd    | u5d    | nmr       | pnmr      | u5mr      | Livebirths | Neonatal birth defects deaths | 1-59 month birth defects deaths | Under five birth defects deaths |
|------|------|---------|---------|------------------|-------|--------|--------|-----------|-----------|-----------|------------|-------------------------------|---------------------------------|---------------------------------|
| CMR  | 2000 | country | 1_Afr   | Cameroon         | 22647 | 69252  | 91899  | 0.0351816 | 0.1075819 | 0.1427635 | 643717     | 1168                          | 223                             | 1392                            |
| CMR  | 2001 | country | 1_Afr   | Cameroon         | 22630 | 71698  | 94328  | 0.0343301 | 0.108767  | 0.1430971 | 659188     | 1197                          | 362                             | 1559                            |
| CMR  | 2002 | country | 1_Afr   | Cameroon         | 22740 | 65205  | 87945  | 0.033673  | 0.0965537 | 0.1302266 | 675319     | 1222                          | 264                             | 1486                            |
| CMR  | 2003 | country | 1_Afr   | Cameroon         | 23021 | 64781  | 87802  | 0.0332726 | 0.0936283 | 0.1269008 | 691892     | 1242                          | 329                             | 1571                            |
| CMR  | 2004 | country | 1_Afr   | Cameroon         | 23376 | 64540  | 87916  | 0.0329858 | 0.0910724 | 0.1240582 | 708668     | 1279                          | 354                             | 1633                            |
| CMR  | 2005 | country | 1_Afr   | Cameroon         | 23762 | 64429  | 88191  | 0.0327583 | 0.0888216 | 0.1215799 | 725373     | 1309                          | 395                             | 1704                            |
| CMR  | 2006 | country | 1_Afr   | Cameroon         | 24123 | 63906  | 88029  | 0.032516  | 0.08614   | 0.118656  | 741880     | 1371                          | 474                             | 1845                            |
| CMR  | 2007 | country | 1_Afr   | Cameroon         | 24431 | 63273  | 87704  | 0.0322301 | 0.0834715 | 0.1157016 | 758018     | 1399                          | 815                             | 2214                            |
| CMR  | 2008 | country | 1_Afr   | Cameroon         | 24680 | 62488  | 87168  | 0.0319017 | 0.0807729 | 0.1126747 | 773625     | 1412                          | 1134                            | 2547                            |
| CMR  | 2009 | country | 1_Afr   | Cameroon         | 24887 | 61785  | 86672  | 0.0315595 | 0.0783507 | 0.1099102 | 788574     | 1450                          | 782                             | 2232                            |
| CMR  | 2010 | country | 1_Afr   | Cameroon         | 25004 | 59999  | 85003  | 0.0311503 | 0.0747479 | 0.1058982 | 802689     | 1481                          | 1008                            | 2488                            |
| CMR  | 2011 | country | 1_Afr   | Cameroon         | 25069 | 58465  | 83534  | 0.0307253 | 0.0716564 | 0.1023817 | 815907     | 1482                          | 1617                            | 3099                            |
| CMR  | 2012 | country | 1_Afr   | Cameroon         | 25075 | 56602  | 81677  | 0.0302734 | 0.0683359 | 0.0986093 | 828284     | 1493                          | 1421                            | 2913                            |
| CMR  | 2013 | country | 1_Afr   | Cameroon         | 25010 | 54139  | 79149  | 0.029776  | 0.0644561 | 0.0942322 | 839937     | 1510                          | 1488                            | 2999                            |
| CMR  | 2014 | country | 1_Afr   | Cameroon         | 24863 | 52125  | 76988  | 0.029215  | 0.0612486 | 0.0904635 | 851037     | 1520                          | 1418                            | 2939                            |
| CMR  | 2015 | country | 1_Afr   | Cameroon         | 24657 | 49984  | 74641  | 0.0286155 | 0.0580091 | 0.0866246 | 861665     | 1501                          | 1375                            | 2876                            |
| CMR  | 2016 | country | 1_Afr   | Cameroon         | 24412 | 47314  | 71726  | 0.0279933 | 0.0542554 | 0.0822487 | 872066     | 1504                          | 1303                            | 2808                            |
| CMR  | 2017 | country | 1_Afr   | Cameroon         | 24132 | 45584  | 69716  | 0.0273493 | 0.0516609 | 0.0790102 | 882364     | 1524                          | 1271                            | 2795                            |
| CMR  | 2018 | country | 1_Afr   | Cameroon         | 23817 | 44168  | 67985  | 0.0266783 | 0.049474  | 0.0761523 | 892747     | 1488                          | 1156                            | 2644                            |
| CMR  | 2019 | country | 1_Afr   | Cameroon         | 23557 | 43297  | 66854  | 0.0260778 | 0.0479302 | 0.074008  | 903337     | 1488                          | 1152                            | 2641                            |
| COD  | 2000 | country | 1_Afr   | Democratic Repub | 83892 | 241588 | 325480 | 0.0385087 | 0.1108955 | 0.1494042 | 2178521    | 4217                          | 247                             | 4464                            |
| COD  | 2001 | country | 1_Afr   | Democratic Repub | 85360 | 240793 | 326153 | 0.0381234 | 0.1075428 | 0.1456662 | 2239043    | 4351                          | 296                             | 4647                            |
| COD  | 2002 | country | 1_Afr   | Democratic Repub | 86784 | 274085 | 360869 | 0.0376939 | 0.1190464 | 0.1567403 | 2302337    | 4594                          | 369                             | 4963                            |
| COD  | 2003 | country | 1_Afr   | Democratic Repub | 88264 | 255556 | 343820 | 0.037262  | 0.1078867 | 0.1451487 | 2368742    | 4772                          | 443                             | 5216                            |
| COD  | 2004 | country | 1_Afr   | Democratic Repub | 89560 | 297235 | 386795 | 0.0367304 | 0.1219022 | 0.1586327 | 2438306    | 4973                          | 358                             | 5331                            |
| COD  | 2005 | country | 1_Afr   | Democratic Repub | 90595 | 245686 | 336281 | 0.036078  | 0.0978405 | 0.1339185 | 2511087    | 5199                          | 603                             | 5801                            |
| COD  | 2006 | country | 1_Afr   | Democratic Repub | 91447 | 223474 | 314921 | 0.0353507 | 0.0863885 | 0.1217392 | 2586853    | 5334                          | 447                             | 5780                            |
| COD  | 2007 | country | 1_Afr   | Democratic Repub | 92190 | 216523 | 308713 | 0.0345953 | 0.0812526 | 0.1158479 | 2664812    | 5487                          | 834                             | 6321                            |
| COD  | 2008 | country | 1_Afr   | Democratic Repub | 93029 | 219881 | 312910 | 0.0339036 | 0.0801335 | 0.1140371 | 2743928    | 5701                          | 893                             | 6594                            |
| COD  | 2009 | country | 1_Afr   | Democratic Repub | 93745 | 209571 | 303316 | 0.0332028 | 0.0742264 | 0.1074291 | 2823409    | 5832                          | 906                             | 6738                            |
| COD  | 2010 | country | 1_Afr   | Democratic Repub | 94325 | 210421 | 304746 | 0.0325007 | 0.0725029 | 0.1050036 | 2902244    | 6117                          | 1192                            | 7309                            |
| COD  | 2011 | country | 1_Afr   | Democratic Repub | 94820 | 219454 | 314274 | 0.0318233 | 0.0736528 | 0.1054761 | 2979578    | 6276                          | 1513                            | 7789                            |
| COD  | 2012 | country | 1_Afr   | Democratic Repub | 95258 | 209435 | 304693 | 0.0311813 | 0.0685553 | 0.0997366 | 3054973    | 6386                          | 1849                            | 8235                            |
| COD  | 2013 | country | 1_Afr   | Democratic Repub | 95695 | 207687 | 303382 | 0.0305913 | 0.0663925 | 0.0969837 | 3128178    | 6537                          | 2480                            | 9017                            |
| COD  | 2014 | country | 1_Afr   | Democratic Repub | 96346 | 196909 | 293255 | 0.0301171 | 0.0615524 | 0.0916696 | 3199042    | 6845                          | 2880                            | 9724                            |
| COD  | 2015 | country | 1_Afr   | Democratic Repub | 96813 | 201508 | 298321 | 0.0296281 | 0.0616682 | 0.0912963 | 3267607    | 6958                          | 3137                            | 10095                           |
| COD  | 2016 | country | 1_Afr   | Democratic Repub | 96793 | 219766 | 316559 | 0.02903   | 0.0659119 | 0.0949419 | 3334236    | 7098                          | 2882                            | 9979                            |
| COD  | 2017 | country | 1_Afr   | Democratic Repub | 96846 | 188149 | 284995 | 0.0284871 | 0.0553437 | 0.0838307 | 3399650    | 7236                          | 2998                            | 10234                           |
| COD  | 2018 | country | 1_Afr   | Democratic Repub | 96929 | 187825 | 284754 | 0.0279771 | 0.0542127 | 0.0821898 | 3464588    | 7271                          | 3141                            | 10412                           |
| COD  | 2019 | country | 1_Afr   | Democratic Repub | 96760 | 242791 | 339551 | 0.0274149 | 0.0687895 | 0.0962043 | 3529471    | 7366                          | 3194                            | 10560                           |

| iso3 | year | level   | whoreg6 | whoname      | nnd  | pnd   | u5d   | nmr       | pnmr      | u5mr      | Livebirths | Neonatal birth defects deaths | 1-59 month birth defects deaths | Under five birth defects deaths |
|------|------|---------|---------|--------------|------|-------|-------|-----------|-----------|-----------|------------|-------------------------------|---------------------------------|---------------------------------|
| COG  | 2000 | country | 1_Afr   | Congo        | 3698 | 9963  | 13661 | 0.0306563 | 0.0825934 | 0.1132497 | 120628     | 250                           | 31                              | 281                             |
| COG  | 2001 | country | 1_Afr   | Congo        | 3745 | 10329 | 14074 | 0.0301245 | 0.0830861 | 0.1132105 | 124318     | 258                           | 35                              | 293                             |
| COG  | 2002 | country | 1_Afr   | Congo        | 3765 | 10619 | 14384 | 0.0293817 | 0.082866  | 0.1122477 | 128141     | 271                           | 42                              | 314                             |
| COG  | 2003 | country | 1_Afr   | Congo        | 3755 | 9355  | 13110 | 0.0284418 | 0.0708584 | 0.0993002 | 132024     | 271                           | 65                              | 336                             |
| COG  | 2004 | country | 1_Afr   | Congo        | 3721 | 8748  | 12469 | 0.0273652 | 0.0643347 | 0.0916999 | 135976     | 277                           | 102                             | 379                             |
| COG  | 2005 | country | 1_Afr   | Congo        | 3678 | 7481  | 11159 | 0.0262881 | 0.0534676 | 0.0797557 | 139911     | 281                           | 84                              | 365                             |
| COG  | 2006 | country | 1_Afr   | Congo        | 3622 | 7053  | 10675 | 0.0251871 | 0.0490435 | 0.0742306 | 143804     | 282                           | 108                             | 390                             |
| COG  | 2007 | country | 1_Afr   | Congo        | 3565 | 6648  | 10213 | 0.024155  | 0.0450476 | 0.0692026 | 147588     | 281                           | 114                             | 395                             |
| COG  | 2008 | country | 1_Afr   | Congo        | 3531 | 6157  | 9688  | 0.0233461 | 0.0407113 | 0.0640574 | 151246     | 280                           | 162                             | 442                             |
| COG  | 2009 | country | 1_Afr   | Congo        | 3515 | 5938  | 9453  | 0.0227342 | 0.038408  | 0.0611422 | 154613     | 284                           | 152                             | 435                             |
| COG  | 2010 | country | 1_Afr   | Congo        | 3523 | 5773  | 9296  | 0.0223363 | 0.0366037 | 0.05894   | 157725     | 289                           | 207                             | 496                             |
| COG  | 2011 | country | 1_Afr   | Congo        | 3534 | 5835  | 9369  | 0.0220317 | 0.0363775 | 0.0584092 | 160405     | 290                           | 253                             | 543                             |
| COG  | 2012 | country | 1_Afr   | Congo        | 3545 | 5744  | 9289  | 0.0217808 | 0.035294  | 0.0570748 | 162758     | 300                           | 243                             | 543                             |
| COG  | 2013 | country | 1_Afr   | Congo        | 3539 | 5659  | 9198  | 0.0214848 | 0.0343528 | 0.0558376 | 164721     | 303                           | 261                             | 565                             |
| COG  | 2014 | country | 1_Afr   | Congo        | 3527 | 5482  | 9009  | 0.0211891 | 0.0329332 | 0.0541223 | 166453     | 301                           | 262                             | 563                             |
| COG  | 2015 | country | 1_Afr   | Congo        | 3505 | 6458  | 9963  | 0.0208699 | 0.0384525 | 0.0593224 | 167945     | 305                           | 261                             | 566                             |
| COG  | 2016 | country | 1_Afr   | Congo        | 3473 | 5589  | 9062  | 0.0205027 | 0.0329952 | 0.0534979 | 169392     | 303                           | 178                             | 481                             |
| COG  | 2017 | country | 1_Afr   | Congo        | 3433 | 5595  | 9028  | 0.0200894 | 0.0327404 | 0.0528298 | 170886     | 302                           | 176                             | 477                             |
| COG  | 2018 | country | 1_Afr   | Congo        | 3401 | 5097  | 8498  | 0.0197096 | 0.0295358 | 0.0492454 | 172555     | 295                           | 195                             | 489                             |
| COG  | 2019 | country | 1_Afr   | Congo        | 3369 | 4873  | 8242  | 0.0193143 | 0.0279345 | 0.0472488 | 174430     | 302                           | 191                             | 494                             |
| COK  | 2000 | country | 6_Wpr   | Cook Islands | 4    | 4     | 8     | 0.0099909 | 0.0099909 | 0.0199819 | 400        | 1                             | 1                               | 2                               |
| COK  | 2001 | country | 6_Wpr   | Cook Islands | 4    | 4     | 8     | 0.0095093 | 0.0095093 | 0.0190187 | 421        | 1                             | 1                               | 2                               |
| COK  | 2002 | country | 6_Wpr   | Cook Islands | 4    | 3     | 7     | 0.0090672 | 0.0068004 | 0.0158675 | 441        | 1                             | 1                               | 2                               |
| COK  | 2003 | country | 6_Wpr   | Cook Islands | 3    | 3     | 6     | 0.0086356 | 0.0086356 | 0.0172712 | 347        | 1                             | 1                               | 1                               |
| COK  | 2004 | country | 6_Wpr   | Cook Islands | 3    | 3     | 6     | 0.0081971 | 0.0081971 | 0.0163943 | 366        | 1                             | 1                               | 1                               |
| COK  | 2005 | country | 6_Wpr   | Cook Islands | 3    | 2     | 5     | 0.0077656 | 0.0051771 | 0.0129427 | 386        | 1                             | 1                               | 1                               |
| COK  | 2006 | country | 6_Wpr   | Cook Islands | 3    | 2     | 5     | 0.0073456 | 0.0048971 | 0.0122427 | 408        | 1                             | 1                               | 1                               |
| COK  | 2007 | country | 6_Wpr   | Cook Islands | 2    | 3     | 5     | 0.0069327 | 0.010399  | 0.0173317 | 288        | 0                             | 1                               | 1                               |
| COK  | 2008 | country | 6_Wpr   | Cook Islands | 2    | 2     | 4     | 0.0065575 | 0.0065575 | 0.0131151 | 305        | 0                             | 1                               | 1                               |
| COK  | 2009 | country | 6_Wpr   | Cook Islands | 2    | 2     | 4     | 0.0061984 | 0.0061984 | 0.0123968 | 323        | 0                             | 1                               | 1                               |
| COK  | 2010 | country | 6_Wpr   | Cook Islands | 2    | 2     | 4     | 0.0058739 | 0.0058739 | 0.0117477 | 340        | 0                             | 1                               | 1                               |
| COK  | 2011 | country | 6_Wpr   | Cook Islands | 2    | 1     | 3     | 0.0056091 | 0.0028046 | 0.0084137 | 357        | 0                             | 0                               | 1                               |
| COK  | 2012 | country | 6_Wpr   | Cook Islands | 2    | 1     | 3     | 0.0053615 | 0.0026808 | 0.0080423 | 373        | 0                             | 0                               | 1                               |
| COK  | 2013 | country | 6_Wpr   | Cook Islands | 2    | 1     | 3     | 0.0051461 | 0.0025731 | 0.0077192 | 389        | 0                             | 0                               | 1                               |
| COK  | 2014 | country | 6_Wpr   | Cook Islands | 1    | 2     | 3     | 0.0049317 | 0.0098634 | 0.0147952 | 203        | 0                             | 1                               | 1                               |
| COK  | 2015 | country | 6_Wpr   | Cook Islands | 1    | 2     | 3     | 0.0047536 | 0.0095072 | 0.0142608 | 210        | 0                             | 1                               | 1                               |
| COK  | 2016 | country | 6_Wpr   | Cook Islands | 1    | 1     | 2     | 0.0045695 | 0.0045695 | 0.0091389 | 219        | 0                             | 0                               | 1                               |
| COK  | 2017 | country | 6_Wpr   | Cook Islands | 1    | 1     | 2     | 0.0044089 | 0.0044089 | 0.0088179 | 227        | 0                             | 0                               | 1                               |
| COK  | 2018 | country | 6_Wpr   | Cook Islands | 1    | 1     | 2     | 0.0042569 | 0.0042569 | 0.0085137 | 235        | 0                             | 0                               | 1                               |
| COK  | 2019 | country | 6_Wpr   | Cook Islands | 1    | 1     | 2     | 0.0041198 | 0.0041198 | 0.0082396 | 243        | 0                             | 0                               | 1                               |

| iso3 | year | level   | whoreg6 | whoname  | nnd   | pnd   | u5d   | nmr       | pnmr      | u5mr      | Livebirths | Neonatal birth defects deaths | 1-59 month birth defects deaths | Under five birth defects deaths |
|------|------|---------|---------|----------|-------|-------|-------|-----------|-----------|-----------|------------|-------------------------------|---------------------------------|---------------------------------|
| COL  | 2000 | country | 2_Amr   | Colombia | 11900 | 10141 | 22041 | 0.0134832 | 0.0114901 | 0.0249733 | 882583     | 2020                          | 1353                            | 3373                            |
| COL  | 2001 | country | 2_Amr   | Colombia | 11422 | 9775  | 21197 | 0.0130672 | 0.011183  | 0.0242502 | 874096     | 2063                          | 1403                            | 3466                            |
| COL  | 2002 | country | 2_Amr   | Colombia | 10963 | 9393  | 20356 | 0.0126924 | 0.0108747 | 0.0235671 | 863746     | 2155                          | 1472                            | 3627                            |
| COL  | 2003 | country | 2_Amr   | Colombia | 10514 | 9006  | 19520 | 0.0123494 | 0.0105781 | 0.0229275 | 851380     | 2207                          | 1415                            | 3622                            |
| COL  | 2004 | country | 2_Amr   | Colombia | 10065 | 8620  | 18685 | 0.012022  | 0.0102961 | 0.0223181 | 837212     | 2200                          | 1477                            | 3677                            |
| COL  | 2005 | country | 2_Amr   | Colombia | 9614  | 8227  | 17841 | 0.0116954 | 0.0100081 | 0.0217035 | 822032     | 2021                          | 1353                            | 3374                            |
| COL  | 2006 | country | 2_Amr   | Colombia | 9164  | 7837  | 17001 | 0.0113619 | 0.0097166 | 0.0210786 | 806554     | 2140                          | 1374                            | 3514                            |
| COL  | 2007 | country | 2_Amr   | Colombia | 8728  | 7471  | 16199 | 0.0110232 | 0.0094356 | 0.0204588 | 791785     | 2042                          | 1356                            | 3398                            |
| COL  | 2008 | country | 2_Amr   | Colombia | 8320  | 7111  | 15431 | 0.0106866 | 0.0091337 | 0.0198203 | 778545     | 1964                          | 1548                            | 3512                            |
| COL  | 2009 | country | 2_Amr   | Colombia | 7940  | 6777  | 14717 | 0.0103484 | 0.0088326 | 0.019181  | 767271     | 1883                          | 1345                            | 3229                            |
| COL  | 2010 | country | 2_Amr   | Colombia | 7600  | 6468  | 14068 | 0.0100198 | 0.0085273 | 0.0185471 | 758501     | 2096                          | 1405                            | 3501                            |
| COL  | 2011 | country | 2_Amr   | Colombia | 7295  | 6188  | 13483 | 0.009699  | 0.0082272 | 0.0179262 | 752138     | 1940                          | 1382                            | 3322                            |
| COL  | 2012 | country | 2_Amr   | Colombia | 7017  | 5922  | 12939 | 0.0093816 | 0.0079176 | 0.0172991 | 747957     | 1952                          | 1299                            | 3251                            |
| COL  | 2013 | country | 2_Amr   | Colombia | 6769  | 5683  | 12452 | 0.0090847 | 0.0076272 | 0.0167118 | 745101     | 1857                          | 1311                            | 3168                            |
| COL  | 2014 | country | 2_Amr   | Colombia | 6533  | 5479  | 12012 | 0.008788  | 0.0073702 | 0.0161582 | 743398     | 1763                          | 1262                            | 3025                            |
| COL  | 2015 | country | 2_Amr   | Colombia | 6314  | 5276  | 11590 | 0.0085091 | 0.0071103 | 0.0156194 | 742026     | 1750                          | 1271                            | 3021                            |
| COL  | 2016 | country | 2_Amr   | Colombia | 6103  | 5107  | 11210 | 0.0082389 | 0.0068943 | 0.0151333 | 740753     | 1671                          | 1194                            | 2865                            |
| COL  | 2017 | country | 2_Amr   | Colombia | 5907  | 4932  | 10839 | 0.0079935 | 0.0066741 | 0.0146676 | 738978     | 1616                          | 1154                            | 2770                            |
| COL  | 2018 | country | 2_Amr   | Colombia | 5701  | 4747  | 10448 | 0.0077427 | 0.0064471 | 0.0141898 | 736304     | 1567                          | 1111                            | 2678                            |
| COL  | 2019 | country | 2_Amr   | Colombia | 5482  | 4609  | 10091 | 0.0074836 | 0.0062919 | 0.0137755 | 732532     | 1502                          | 1079                            | 2582                            |
| COM  | 2000 | country | 1_Afr   | Comoros  | 826   | 1157  | 1983  | 0.0406334 | 0.0569162 | 0.0975496 | 20328      | 43                            | 26                              | 69                              |
| COM  | 2001 | country | 1_Afr   | Comoros  | 840   | 1168  | 2008  | 0.0406314 | 0.056497  | 0.0971285 | 20674      | 44                            | 26                              | 70                              |
| COM  | 2002 | country | 1_Afr   | Comoros  | 851   | 1186  | 2037  | 0.0404019 | 0.0563062 | 0.0967081 | 21063      | 47                            | 27                              | 74                              |
| COM  | 2003 | country | 1_Afr   | Comoros  | 864   | 1199  | 2063  | 0.0402709 | 0.0558852 | 0.0961562 | 21455      | 49                            | 25                              | 74                              |
| COM  | 2004 | country | 1_Afr   | Comoros  | 872   | 1206  | 2078  | 0.0399311 | 0.0552259 | 0.095157  | 21838      | 50                            | 33                              | 82                              |
| COM  | 2005 | country | 1_Afr   | Comoros  | 880   | 1200  | 2080  | 0.0395488 | 0.0539301 | 0.0934789 | 22251      | 51                            | 27                              | 78                              |
| COM  | 2006 | country | 1_Afr   | Comoros  | 881   | 1192  | 2073  | 0.0388927 | 0.0526222 | 0.0915149 | 22652      | 53                            | 26                              | 79                              |
| COM  | 2007 | country | 1_Afr   | Comoros  | 884   | 1173  | 2057  | 0.0382997 | 0.0508208 | 0.0891206 | 23081      | 53                            | 27                              | 80                              |
| COM  | 2008 | country | 1_Afr   | Comoros  | 887   | 1154  | 2041  | 0.0377512 | 0.0491148 | 0.086866  | 23496      | 55                            | 37                              | 92                              |
| COM  | 2009 | country | 1_Afr   | Comoros  | 885   | 1134  | 2019  | 0.0370005 | 0.0474108 | 0.0844113 | 23919      | 54                            | 40                              | 95                              |
| COM  | 2010 | country | 1_Afr   | Comoros  | 881   | 1116  | 1997  | 0.0362345 | 0.0458997 | 0.0821342 | 24314      | 56                            | 34                              | 90                              |
| COM  | 2011 | country | 1_Afr   | Comoros  | 878   | 1083  | 1961  | 0.0355412 | 0.0438395 | 0.0793807 | 24704      | 56                            | 42                              | 99                              |
| COM  | 2012 | country | 1_Afr   | Comoros  | 873   | 1061  | 1934  | 0.03484   | 0.0423428 | 0.0771828 | 25057      | 56                            | 48                              | 104                             |
| COM  | 2013 | country | 1_Afr   | Comoros  | 864   | 1039  | 1903  | 0.0340436 | 0.040939  | 0.0749826 | 25379      | 57                            | 49                              | 106                             |
| COM  | 2014 | country | 1_Afr   | Comoros  | 858   | 1008  | 1866  | 0.0334662 | 0.039317  | 0.0727832 | 25638      | 59                            | 57                              | 115                             |
| COM  | 2015 | country | 1_Afr   | Comoros  | 846   | 980   | 1826  | 0.0326423 | 0.0378126 | 0.070455  | 25917      | 58                            | 62                              | 121                             |
| COM  | 2016 | country | 1_Afr   | Comoros  | 833   | 951   | 1784  | 0.0318835 | 0.0364    | 0.0682834 | 26126      | 58                            | 62                              | 120                             |
| COM  | 2017 | country | 1_Afr   | Comoros  | 824   | 920   | 1744  | 0.0312894 | 0.0349347 | 0.0662241 | 26335      | 57                            | 62                              | 119                             |
| COM  | 2018 | country | 1_Afr   | Comoros  | 809   | 890   | 1699  | 0.030484  | 0.0335362 | 0.0640203 | 26538      | 58                            | 59                              | 117                             |
| COM  | 2019 | country | 1_Afr   | Comoros  | 797   | 859   | 1656  | 0.0298207 | 0.0321405 | 0.0619612 | 26726      | 58                            | 58                              | 116                             |

| iso3 | year | level   | whoreg6 | whoname    | nnd | pnd | u5d  | nmr       | pnmr      | u5mr      | Livebirths | Neonatal birth defects deaths | 1-59 month birth defects deaths | Under five birth defects deaths |
|------|------|---------|---------|------------|-----|-----|------|-----------|-----------|-----------|------------|-------------------------------|---------------------------------|---------------------------------|
| CPV  | 2000 | country | 1_Afr   | Cabo Verde | 208 | 244 | 452  | 0.0175922 | 0.0206212 | 0.0382134 | 11823      | 18                            | 23                              | 41                              |
| CPV  | 2001 | country | 1_Afr   | Cabo Verde | 196 | 212 | 408  | 0.0168032 | 0.0182093 | 0.0350125 | 11664      | 19                            | 19                              | 38                              |
| CPV  | 2002 | country | 1_Afr   | Cabo Verde | 187 | 190 | 377  | 0.0161539 | 0.01645   | 0.0326039 | 11576      | 19                            | 16                              | 35                              |
| CPV  | 2003 | country | 1_Afr   | Cabo Verde | 180 | 176 | 356  | 0.0157355 | 0.015355  | 0.0310905 | 11439      | 20                            | 15                              | 35                              |
| CPV  | 2004 | country | 1_Afr   | Cabo Verde | 176 | 167 | 343  | 0.0154787 | 0.0146508 | 0.0301295 | 11371      | 20                            | 14                              | 34                              |
| CPV  | 2005 | country | 1_Afr   | Cabo Verde | 173 | 163 | 336  | 0.0153957 | 0.0144726 | 0.0298683 | 11237      | 21                            | 14                              | 35                              |
| CPV  | 2006 | country | 1_Afr   | Cabo Verde | 173 | 142 | 315  | 0.0154931 | 0.012676  | 0.0281692 | 11166      | 21                            | 14                              | 35                              |
| CPV  | 2007 | country | 1_Afr   | Cabo Verde | 174 | 139 | 313  | 0.0156289 | 0.0124749 | 0.0281038 | 11133      | 22                            | 15                              | 36                              |
| CPV  | 2008 | country | 1_Afr   | Cabo Verde | 174 | 136 | 310  | 0.0156884 | 0.0122523 | 0.0279407 | 11091      | 22                            | 15                              | 37                              |
| CPV  | 2009 | country | 1_Afr   | Cabo Verde | 173 | 131 | 304  | 0.0156076 | 0.0117869 | 0.0273945 | 11084      | 22                            | 15                              | 38                              |
| CPV  | 2010 | country | 1_Afr   | Cabo Verde | 169 | 122 | 291  | 0.0153251 | 0.0110969 | 0.026422  | 11028      | 23                            | 16                              | 38                              |
| CPV  | 2011 | country | 1_Afr   | Cabo Verde | 164 | 116 | 280  | 0.0148421 | 0.0104638 | 0.0253059 | 11050      | 23                            | 16                              | 39                              |
| CPV  | 2012 | country | 1_Afr   | Cabo Verde | 157 | 108 | 265  | 0.0141946 | 0.0097469 | 0.0239415 | 11061      | 24                            | 16                              | 40                              |
| CPV  | 2013 | country | 1_Afr   | Cabo Verde | 148 | 101 | 249  | 0.0134319 | 0.0091615 | 0.0225934 | 11019      | 24                            | 16                              | 40                              |
| CPV  | 2014 | country | 1_Afr   | Cabo Verde | 138 | 92  | 230  | 0.0126023 | 0.0084015 | 0.0210038 | 10950      | 24                            | 16                              | 40                              |
| CPV  | 2015 | country | 1_Afr   | Cabo Verde | 128 | 85  | 213  | 0.0117452 | 0.0077996 | 0.0195448 | 10898      | 24                            | 16                              | 40                              |
| CPV  | 2016 | country | 1_Afr   | Cabo Verde | 118 | 78  | 196  | 0.0109195 | 0.007218  | 0.0181375 | 10806      | 24                            | 15                              | 39                              |
| CPV  | 2017 | country | 1_Afr   | Cabo Verde | 109 | 72  | 181  | 0.0101613 | 0.006712  | 0.0168733 | 10727      | 24                            | 15                              | 38                              |
| CPV  | 2018 | country | 1_Afr   | Cabo Verde | 101 | 67  | 168  | 0.0095205 | 0.0063156 | 0.0158361 | 10609      | 22                            | 15                              | 37                              |
| CPV  | 2019 | country | 1_Afr   | Cabo Verde | 94  | 63  | 157  | 0.0089824 | 0.0060201 | 0.0150024 | 10465      | 20                            | 14                              | 35                              |
| CRI  | 2000 | country | 2_Amr   | Costa Rica | 587 | 424 | 1011 | 0.007687  | 0.0055525 | 0.0132395 | 76362      | 204                           | 116                             | 320                             |
| CRI  | 2001 | country | 2_Amr   | Costa Rica | 563 | 393 | 956  | 0.0075022 | 0.0052369 | 0.0127391 | 75045      | 183                           | 120                             | 303                             |
| CRI  | 2002 | country | 2_Amr   | Costa Rica | 541 | 366 | 907  | 0.0073194 | 0.0049518 | 0.0122712 | 73913      | 162                           | 118                             | 280                             |
| CRI  | 2003 | country | 2_Amr   | Costa Rica | 525 | 343 | 868  | 0.0072072 | 0.0047087 | 0.0119159 | 72844      | 156                           | 123                             | 279                             |
| CRI  | 2004 | country | 2_Amr   | Costa Rica | 514 | 324 | 838  | 0.0071252 | 0.0044914 | 0.0116166 | 72138      | 172                           | 86                              | 257                             |
| CRI  | 2005 | country | 2_Amr   | Costa Rica | 507 | 310 | 817  | 0.0070586 | 0.0043159 | 0.0113745 | 71828      | 185                           | 97                              | 282                             |
| CRI  | 2006 | country | 2_Amr   | Costa Rica | 500 | 303 | 803  | 0.0069793 | 0.0042295 | 0.0112088 | 71640      | 148                           | 100                             | 248                             |
| CRI  | 2007 | country | 2_Amr   | Costa Rica | 492 | 300 | 792  | 0.0068785 | 0.0041942 | 0.0110728 | 71527      | 167                           | 109                             | 276                             |
| CRI  | 2008 | country | 2_Amr   | Costa Rica | 487 | 295 | 782  | 0.0068007 | 0.0041195 | 0.0109202 | 71611      | 150                           | 108                             | 258                             |
| CRI  | 2009 | country | 2_Amr   | Costa Rica | 483 | 286 | 769  | 0.0067312 | 0.0039858 | 0.010717  | 71755      | 200                           | 111                             | 311                             |
| CRI  | 2010 | country | 2_Amr   | Costa Rica | 480 | 273 | 753  | 0.0066684 | 0.0037926 | 0.010461  | 71982      | 176                           | 99                              | 274                             |
| CRI  | 2011 | country | 2_Amr   | Costa Rica | 475 | 258 | 733  | 0.0065826 | 0.0035754 | 0.010158  | 72160      | 181                           | 95                              | 276                             |
| CRI  | 2012 | country | 2_Amr   | Costa Rica | 469 | 242 | 711  | 0.0065073 | 0.0033577 | 0.0098651 | 72072      | 190                           | 96                              | 286                             |
| CRI  | 2013 | country | 2_Amr   | Costa Rica | 461 | 227 | 688  | 0.0063944 | 0.0031487 | 0.0095431 | 72094      | 168                           | 82                              | 250                             |
| CRI  | 2014 | country | 2_Amr   | Costa Rica | 453 | 214 | 667  | 0.0062967 | 0.0029746 | 0.0092713 | 71942      | 187                           | 75                              | 262                             |
| CRI  | 2015 | country | 2_Amr   | Costa Rica | 445 | 203 | 648  | 0.0062202 | 0.0028375 | 0.0090578 | 71541      | 175                           | 75                              | 251                             |
| CRI  | 2016 | country | 2_Amr   | Costa Rica | 439 | 194 | 633  | 0.0061743 | 0.0027285 | 0.0089027 | 71102      | 172                           | 72                              | 243                             |
| CRI  | 2017 | country | 2_Amr   | Costa Rica | 434 | 187 | 621  | 0.0061606 | 0.0026545 | 0.008815  | 70448      | 173                           | 69                              | 242                             |
| CRI  | 2018 | country | 2_Amr   | Costa Rica | 430 | 180 | 610  | 0.0061562 | 0.002577  | 0.0087332 | 69849      | 170                           | 67                              | 236                             |
| CRI  | 2019 | country | 2_Amr   | Costa Rica | 425 | 174 | 599  | 0.0061514 | 0.0025185 | 0.0086699 | 69090      | 168                           | 64                              | 232                             |

| iso3 | year | level   | whoreg6 | whoname | nnd | pnd | u5d  | nmr       | pnmr      | u5mr      | Livebirths | Neonatal birth defects deaths | 1-59 month birth defects deaths | Under five birth defects deaths |
|------|------|---------|---------|---------|-----|-----|------|-----------|-----------|-----------|------------|-------------------------------|---------------------------------|---------------------------------|
| CUB  | 2000 | country | 2_Amr   | Cuba    | 624 | 671 | 1295 | 0.0042929 | 0.0046162 | 0.0089091 | 145358     | 161                           | 195                             | 356                             |
| CUB  | 2001 | country | 2_Amr   | Cuba    | 594 | 630 | 1224 | 0.0041801 | 0.0044334 | 0.0086135 | 142102     | 155                           | 185                             | 340                             |
| CUB  | 2002 | country | 2_Amr   | Cuba    | 557 | 598 | 1155 | 0.0040102 | 0.0043054 | 0.0083155 | 138897     | 148                           | 193                             | 341                             |
| CUB  | 2003 | country | 2_Amr   | Cuba    | 515 | 573 | 1088 | 0.0037987 | 0.0042265 | 0.0080251 | 135574     | 136                           | 147                             | 283                             |
| CUB  | 2004 | country | 2_Amr   | Cuba    | 474 | 553 | 1027 | 0.0035813 | 0.0041782 | 0.0077594 | 132355     | 121                           | 169                             | 290                             |
| CUB  | 2005 | country | 2_Amr   | Cuba    | 440 | 532 | 972  | 0.0033974 | 0.0041078 | 0.0075051 | 129511     | 120                           | 149                             | 269                             |
| CUB  | 2006 | country | 2_Amr   | Cuba    | 416 | 507 | 923  | 0.0032661 | 0.0039805 | 0.0072466 | 127370     | 103                           | 122                             | 225                             |
| CUB  | 2007 | country | 2_Amr   | Cuba    | 400 | 480 | 880  | 0.0031705 | 0.0038047 | 0.0069752 | 126161     | 88                            | 132                             | 220                             |
| CUB  | 2008 | country | 2_Amr   | Cuba    | 387 | 458 | 845  | 0.0030818 | 0.0036472 | 0.0067291 | 125574     | 77                            | 107                             | 183                             |
| CUB  | 2009 | country | 2_Amr   | Cuba    | 374 | 441 | 815  | 0.002982  | 0.0035162 | 0.0064981 | 125420     | 87                            | 103                             | 190                             |
| CUB  | 2010 | country | 2_Amr   | Cuba    | 361 | 431 | 792  | 0.0028699 | 0.0034263 | 0.0062962 | 125790     | 69                            | 117                             | 186                             |
| CUB  | 2011 | country | 2_Amr   | Cuba    | 347 | 424 | 771  | 0.0027515 | 0.003362  | 0.0061135 | 126115     | 71                            | 110                             | 181                             |
| CUB  | 2012 | country | 2_Amr   | Cuba    | 332 | 420 | 752  | 0.0026355 | 0.003334  | 0.0059695 | 125974     | 95                            | 93                              | 187                             |
| CUB  | 2013 | country | 2_Amr   | Cuba    | 317 | 417 | 734  | 0.0025307 | 0.0033291 | 0.0058598 | 125260     | 59                            | 103                             | 162                             |
| CUB  | 2014 | country | 2_Amr   | Cuba    | 302 | 411 | 713  | 0.0024331 | 0.0033113 | 0.0057444 | 124120     | 65                            | 86                              | 151                             |
| CUB  | 2015 | country | 2_Amr   | Cuba    | 288 | 402 | 690  | 0.0023523 | 0.0032835 | 0.0056358 | 122432     | 55                            | 95                              | 150                             |
| CUB  | 2016 | country | 2_Amr   | Cuba    | 275 | 391 | 666  | 0.0022913 | 0.0032578 | 0.005549  | 120021     | 48                            | 100                             | 148                             |
| CUB  | 2017 | country | 2_Amr   | Cuba    | 265 | 376 | 641  | 0.0022569 | 0.0032022 | 0.0054591 | 117419     | 51                            | 88                              | 139                             |
| CUB  | 2018 | country | 2_Amr   | Cuba    | 255 | 361 | 616  | 0.0022122 | 0.0031318 | 0.005344  | 115270     | 47                            | 84                              | 132                             |
| CUB  | 2019 | country | 2_Amr   | Cuba    | 246 | 345 | 591  | 0.0021794 | 0.0030564 | 0.0052358 | 112877     | 45                            | 81                              | 126                             |
| CYP  | 2000 | country | 4_Eur   | Cyprus  | 45  | 38  | 83   | 0.0036525 | 0.0030843 | 0.0067368 | 12320      | 8                             | 24                              | 32                              |
| CYP  | 2001 | country | 4_Eur   | Cyprus  | 42  | 35  | 77   | 0.003441  | 0.0028675 | 0.0063084 | 12206      | 8                             | 21                              | 29                              |
| CYP  | 2002 | country | 4_Eur   | Cyprus  | 39  | 33  | 72   | 0.0032478 | 0.0027482 | 0.005996  | 12008      | 7                             | 19                              | 26                              |
| CYP  | 2003 | country | 4_Eur   | Cyprus  | 37  | 30  | 67   | 0.0030718 | 0.0024907 | 0.0055625 | 12045      | 7                             | 17                              | 23                              |
| CYP  | 2004 | country | 4_Eur   | Cyprus  | 35  | 28  | 63   | 0.002893  | 0.0023144 | 0.0052074 | 12098      | 6                             | 15                              | 21                              |
| CYP  | 2005 | country | 4_Eur   | Cyprus  | 33  | 26  | 59   | 0.0027194 | 0.0021425 | 0.0048619 | 12135      | 6                             | 13                              | 19                              |
| CYP  | 2006 | country | 4_Eur   | Cyprus  | 31  | 25  | 56   | 0.0025475 | 0.0020544 | 0.0046019 | 12169      | 6                             | 12                              | 18                              |
| CYP  | 2007 | country | 4_Eur   | Cyprus  | 30  | 23  | 53   | 0.0023904 | 0.0018326 | 0.004223  | 12550      | 5                             | 10                              | 15                              |
| CYP  | 2008 | country | 4_Eur   | Cyprus  | 28  | 22  | 50   | 0.002247  | 0.0017655 | 0.0040124 | 12461      | 6                             | 9                               | 15                              |
| CYP  | 2009 | country | 4_Eur   | Cyprus  | 27  | 20  | 47   | 0.0021239 | 0.0015733 | 0.0036972 | 12712      | 5                             | 8                               | 12                              |
| CYP  | 2010 | country | 4_Eur   | Cyprus  | 26  | 19  | 45   | 0.0020113 | 0.0014698 | 0.0034811 | 12927      | 3                             | 7                               | 10                              |
| CYP  | 2011 | country | 4_Eur   | Cyprus  | 24  | 19  | 43   | 0.0019106 | 0.0015126 | 0.0034232 | 12561      | 7                             | 4                               | 11                              |
| CYP  | 2012 | country | 4_Eur   | Cyprus  | 23  | 18  | 41   | 0.001817  | 0.001422  | 0.003239  | 12658      | 3                             | 7                               | 9                               |
| CYP  | 2013 | country | 4_Eur   | Cyprus  | 22  | 17  | 39   | 0.0017325 | 0.0013388 | 0.0030713 | 12698      | 0                             | 5                               | 5                               |
| CYP  | 2014 | country | 4_Eur   | Cyprus  | 21  | 16  | 37   | 0.0016524 | 0.0012589 | 0.0029113 | 12709      | 6                             | 2                               | 8                               |
| CYP  | 2015 | country | 4_Eur   | Cyprus  | 20  | 15  | 35   | 0.00158   | 0.001185  | 0.002765  | 12658      | 4                             | 3                               | 6                               |
| CYP  | 2016 | country | 4_Eur   | Cyprus  | 19  | 14  | 33   | 0.0015065 | 0.0011101 | 0.0026166 | 12612      | 6                             | 3                               | 9                               |
| CYP  | 2017 | country | 4_Eur   | Cyprus  | 18  | 14  | 32   | 0.0014415 | 0.0011212 | 0.0025627 | 12487      | 5                             | 2                               | 7                               |
| CYP  | 2018 | country | 4_Eur   | Cyprus  | 17  | 13  | 30   | 0.0013767 | 0.0010527 | 0.0024294 | 12349      | 4                             | 2                               | 6                               |
| CYP  | 2019 | country | 4_Eur   | Cyprus  | 16  | 13  | 29   | 0.0013209 | 0.0010732 | 0.002394  | 12113      | 4                             | 2                               | 6                               |

| iso3 | year | level   | whoreg6 | whoname | nnd  | pnd  | u5d  | nmr       | pnmr      | u5mr      | Livebirths | Neonatal birth defects deaths | 1-59 month birth defects deaths | Under five birth defects deaths |
|------|------|---------|---------|---------|------|------|------|-----------|-----------|-----------|------------|-------------------------------|---------------------------------|---------------------------------|
| CZE  | 2000 | country | 4_Eur   | Czechia | 239  | 250  | 489  | 0.0027118 | 0.0028366 | 0.0055483 | 88135      | 50                            | 47                              | 98                              |
| CZE  | 2001 | country | 4_Eur   | Czechia | 228  | 236  | 464  | 0.0025495 | 0.0026389 | 0.0051884 | 89430      | 66                            | 65                              | 130                             |
| CZE  | 2002 | country | 4_Eur   | Czechia | 225  | 226  | 451  | 0.0024345 | 0.0024453 | 0.0048798 | 92422      | 58                            | 47                              | 105                             |
| CZE  | 2003 | country | 4_Eur   | Czechia | 225  | 219  | 444  | 0.0023544 | 0.0022916 | 0.004646  | 95567      | 60                            | 57                              | 118                             |
| CZE  | 2004 | country | 4_Eur   | Czechia | 227  | 212  | 439  | 0.002285  | 0.002134  | 0.004419  | 99344      | 37                            | 41                              | 78                              |
| CZE  | 2005 | country | 4_Eur   | Czechia | 227  | 207  | 434  | 0.002196  | 0.0020025 | 0.0041985 | 103370     | 53                            | 55                              | 108                             |
| CZE  | 2006 | country | 4_Eur   | Czechia | 223  | 204  | 427  | 0.002088  | 0.0019101 | 0.003998  | 106803     | 44                            | 44                              | 89                              |
| CZE  | 2007 | country | 4_Eur   | Czechia | 216  | 201  | 417  | 0.0019734 | 0.0018364 | 0.0038098 | 109454     | 64                            | 34                              | 97                              |
| CZE  | 2008 | country | 4_Eur   | Czechia | 207  | 198  | 405  | 0.0018574 | 0.0017766 | 0.003634  | 111448     | 39                            | 61                              | 101                             |
| CZE  | 2009 | country | 4_Eur   | Czechia | 198  | 194  | 392  | 0.0017647 | 0.0017291 | 0.0034938 | 112199     | 39                            | 50                              | 89                              |
| CZE  | 2010 | country | 4_Eur   | Czechia | 189  | 189  | 378  | 0.0016789 | 0.0016789 | 0.0033579 | 112571     | 34                            | 49                              | 83                              |
| CZE  | 2011 | country | 4_Eur   | Czechia | 182  | 184  | 366  | 0.0016211 | 0.0016389 | 0.0032601 | 112268     | 45                            | 38                              | 83                              |
| CZE  | 2012 | country | 4_Eur   | Czechia | 177  | 179  | 356  | 0.0015886 | 0.0016066 | 0.0031952 | 111418     | 49                            | 38                              | 87                              |
| CZE  | 2013 | country | 4_Eur   | Czechia | 175  | 175  | 350  | 0.0015765 | 0.0015765 | 0.003153  | 111006     | 37                            | 37                              | 74                              |
| CZE  | 2014 | country | 4_Eur   | Czechia | 175  | 174  | 349  | 0.001576  | 0.001567  | 0.003143  | 111041     | 35                            | 59                              | 94                              |
| CZE  | 2015 | country | 4_Eur   | Czechia | 176  | 174  | 350  | 0.0015805 | 0.0015626 | 0.0031431 | 111356     | 35                            | 38                              | 73                              |
| CZE  | 2016 | country | 4_Eur   | Czechia | 179  | 174  | 353  | 0.0016133 | 0.0015683 | 0.0031816 | 110950     | 33                            | 28                              | 61                              |
| CZE  | 2017 | country | 4_Eur   | Czechia | 181  | 173  | 354  | 0.0016305 | 0.0015585 | 0.003189  | 111006     | 37                            | 34                              | 71                              |
| CZE  | 2018 | country | 4_Eur   | Czechia | 181  | 173  | 354  | 0.0016371 | 0.0015647 | 0.0032017 | 110565     | 35                            | 33                              | 69                              |
| CZE  | 2019 | country | 4_Eur   | Czechia | 179  | 171  | 350  | 0.0016326 | 0.0015597 | 0.0031923 | 109638     | 35                            | 33                              | 68                              |
| DEU  | 2000 | country | 4_Eur   | Germany | 2074 | 1979 | 4053 | 0.0027696 | 0.0026428 | 0.0054124 | 748834     | 694                           | 661                             | 1355                            |
| DEU  | 2001 | country | 4_Eur   | Germany | 2022 | 1870 | 3892 | 0.0027456 | 0.0025392 | 0.0052848 | 736448     | 620                           | 622                             | 1243                            |
| DEU  | 2002 | country | 4_Eur   | Germany | 1966 | 1772 | 3738 | 0.0027164 | 0.0024483 | 0.0051647 | 723763     | 597                           | 576                             | 1173                            |
| DEU  | 2003 | country | 4_Eur   | Germany | 1905 | 1684 | 3589 | 0.0026764 | 0.0023659 | 0.0050423 | 711774     | 589                           | 564                             | 1153                            |
| DEU  | 2004 | country | 4_Eur   | Germany | 1849 | 1600 | 3449 | 0.0026383 | 0.002283  | 0.0049214 | 700822     | 540                           | 512                             | 1052                            |
| DEU  | 2005 | country | 4_Eur   | Germany | 1807 | 1507 | 3314 | 0.002612  | 0.0021783 | 0.0047903 | 691813     | 525                           | 489                             | 1015                            |
| DEU  | 2006 | country | 4_Eur   | Germany | 1768 | 1421 | 3189 | 0.0025821 | 0.0020753 | 0.0046574 | 684714     | 458                           | 469                             | 927                             |
| DEU  | 2007 | country | 4_Eur   | Germany | 1716 | 1358 | 3074 | 0.0025267 | 0.0019996 | 0.0045262 | 679151     | 477                           | 419                             | 895                             |
| DEU  | 2008 | country | 4_Eur   | Germany | 1648 | 1324 | 2972 | 0.0024393 | 0.0019597 | 0.004399  | 675605     | 463                           | 416                             | 879                             |
| DEU  | 2009 | country | 4_Eur   | Germany | 1588 | 1299 | 2887 | 0.0023537 | 0.0019254 | 0.0042791 | 674679     | 496                           | 435                             | 931                             |
| DEU  | 2010 | country | 4_Eur   | Germany | 1559 | 1262 | 2821 | 0.0023047 | 0.0018657 | 0.0041704 | 676434     | 473                           | 443                             | 917                             |
| DEU  | 2011 | country | 4_Eur   | Germany | 1560 | 1218 | 2778 | 0.002288  | 0.0017864 | 0.0040745 | 681803     | 464                           | 409                             | 873                             |
| DEU  | 2012 | country | 4_Eur   | Germany | 1578 | 1183 | 2761 | 0.0022828 | 0.0017114 | 0.0039942 | 691250     | 456                           | 407                             | 863                             |
| DEU  | 2013 | country | 4_Eur   | Germany | 1605 | 1163 | 2768 | 0.0022786 | 0.0016511 | 0.0039297 | 704386     | 511                           | 397                             | 908                             |
| DEU  | 2014 | country | 4_Eur   | Germany | 1643 | 1152 | 2795 | 0.0022829 | 0.0016006 | 0.0038835 | 719714     | 471                           | 421                             | 892                             |
| DEU  | 2015 | country | 4_Eur   | Germany | 1692 | 1145 | 2837 | 0.0022979 | 0.001555  | 0.0038529 | 736336     | 475                           | 390                             | 865                             |
| DEU  | 2016 | country | 4_Eur   | Germany | 1742 | 1143 | 2885 | 0.0023146 | 0.0015187 | 0.0038334 | 752599     | 500                           | 428                             | 929                             |
| DEU  | 2017 | country | 4_Eur   | Germany | 1779 | 1148 | 2927 | 0.0023195 | 0.0014968 | 0.0038164 | 766960     | 507                           | 414                             | 921                             |
| DEU  | 2018 | country | 4_Eur   | Germany | 1794 | 1160 | 2954 | 0.0023053 | 0.0014906 | 0.0037959 | 778212     | 510                           | 418                             | 928                             |
| DEU  | 2019 | country | 4_Eur   | Germany | 1788 | 1171 | 2959 | 0.0022751 | 0.00149   | 0.0037651 | 785897     | 510                           | 422                             | 932                             |

| iso3 | year | level   | whoreg6 | whoname  | nnd | pnd  | u5d  | nmr       | pnmr      | u5mr      | Livebirths | Neonatal birth defects deaths | 1-59 month birth defects deaths | Under five birth defects deaths |
|------|------|---------|---------|----------|-----|------|------|-----------|-----------|-----------|------------|-------------------------------|---------------------------------|---------------------------------|
| DJI  | 2000 | country | 5_Emr   | Djibouti | 986 | 1299 | 2285 | 0.0439442 | 0.0579081 | 0.1018523 | 22438      | 51                            | 14                              | 65                              |
| DJI  | 2001 | country | 5_Emr   | Djibouti | 972 | 1203 | 2175 | 0.0433258 | 0.0536138 | 0.0969396 | 22435      | 53                            | 14                              | 67                              |
| DJI  | 2002 | country | 5_Emr   | Djibouti | 958 | 1147 | 2105 | 0.0427138 | 0.0511557 | 0.0938696 | 22428      | 51                            | 20                              | 71                              |
| DJI  | 2003 | country | 5_Emr   | Djibouti | 942 | 1093 | 2035 | 0.0421304 | 0.0488857 | 0.0910161 | 22359      | 53                            | 23                              | 75                              |
| DJI  | 2004 | country | 5_Emr   | Djibouti | 923 | 1116 | 2039 | 0.0415007 | 0.0501601 | 0.0916607 | 22241      | 53                            | 20                              | 73                              |
| DJI  | 2005 | country | 5_Emr   | Djibouti | 902 | 1210 | 2112 | 0.0408487 | 0.0547903 | 0.095639  | 22081      | 52                            | 23                              | 75                              |
| DJI  | 2006 | country | 5_Emr   | Djibouti | 880 | 987  | 1867 | 0.040187  | 0.0450789 | 0.0852659 | 21898      | 52                            | 25                              | 77                              |
| DJI  | 2007 | country | 5_Emr   | Djibouti | 857 | 939  | 1796 | 0.0394812 | 0.0432364 | 0.0827176 | 21707      | 53                            | 31                              | 84                              |
| DJI  | 2008 | country | 5_Emr   | Djibouti | 835 | 979  | 1814 | 0.0387748 | 0.0454627 | 0.0842375 | 21535      | 52                            | 31                              | 83                              |
| DJI  | 2009 | country | 5_Emr   | Djibouti | 815 | 872  | 1687 | 0.0380776 | 0.0407301 | 0.0788077 | 21404      | 52                            | 41                              | 93                              |
| DJI  | 2010 | country | 5_Emr   | Djibouti | 796 | 818  | 1614 | 0.0373496 | 0.0383865 | 0.0757361 | 21312      | 52                            | 42                              | 94                              |
| DJI  | 2011 | country | 5_Emr   | Djibouti | 776 | 803  | 1579 | 0.0365335 | 0.0378194 | 0.074353  | 21241      | 52                            | 41                              | 94                              |
| DJI  | 2012 | country | 5_Emr   | Djibouti | 757 | 812  | 1569 | 0.035725  | 0.038323  | 0.074048  | 21190      | 52                            | 40                              | 92                              |
| DJI  | 2013 | country | 5_Emr   | Djibouti | 737 | 730  | 1467 | 0.0349054 | 0.0345888 | 0.0694941 | 21114      | 50                            | 42                              | 91                              |
| DJI  | 2014 | country | 5_Emr   | Djibouti | 719 | 691  | 1410 | 0.0341598 | 0.0328301 | 0.0669899 | 21048      | 50                            | 33                              | 83                              |
| DJI  | 2015 | country | 5_Emr   | Djibouti | 701 | 685  | 1386 | 0.0334541 | 0.0326811 | 0.0661352 | 20954      | 51                            | 36                              | 87                              |
| DJI  | 2016 | country | 5_Emr   | Djibouti | 682 | 623  | 1305 | 0.0327343 | 0.0299245 | 0.0626589 | 20834      | 49                            | 36                              | 85                              |
| DJI  | 2017 | country | 5_Emr   | Djibouti | 662 | 598  | 1260 | 0.0319996 | 0.0288904 | 0.06089   | 20688      | 49                            | 41                              | 90                              |
| DJI  | 2018 | country | 5_Emr   | Djibouti | 642 | 592  | 1234 | 0.0312148 | 0.0287763 | 0.059991  | 20567      | 49                            | 44                              | 93                              |
| DJI  | 2019 | country | 5_Emr   | Djibouti | 623 | 546  | 1169 | 0.0305082 | 0.0267495 | 0.0572577 | 20421      | 48                            | 42                              | 90                              |
| DMA  | 2000 | country | 2_Amr   | Dominica | 16  | 5    | 21   | 0.0128685 | 0.0040214 | 0.0168899 | 1243       | 2                             | 1                               | 3                               |
| DMA  | 2001 | country | 2_Amr   | Dominica | 15  | 6    | 21   | 0.0133075 | 0.005323  | 0.0186305 | 1127       | 4                             | 2                               | 6                               |
| DMA  | 2002 | country | 2_Amr   | Dominica | 15  | 5    | 20   | 0.013791  | 0.004597  | 0.0183879 | 1088       | 0                             | 1                               | 1                               |
| DMA  | 2003 | country | 2_Amr   | Dominica | 15  | 5    | 20   | 0.0143136 | 0.0047712 | 0.0190848 | 1048       | 0                             | 1                               | 1                               |
| DMA  | 2004 | country | 2_Amr   | Dominica | 15  | 5    | 20   | 0.0148908 | 0.0049636 | 0.0198544 | 1007       | 1                             | 1                               | 2                               |
| DMA  | 2005 | country | 2_Amr   | Dominica | 15  | 5    | 20   | 0.0155164 | 0.0051721 | 0.0206886 | 967        | 5                             | 0                               | 5                               |
| DMA  | 2006 | country | 2_Amr   | Dominica | 15  | 5    | 20   | 0.0161983 | 0.0053994 | 0.0215978 | 926        | 2                             | 3                               | 5                               |
| DMA  | 2007 | country | 2_Amr   | Dominica | 16  | 4    | 20   | 0.0169401 | 0.004235  | 0.0211752 | 945        | 2                             | 1                               | 3                               |
| DMA  | 2008 | country | 2_Amr   | Dominica | 16  | 5    | 21   | 0.0177267 | 0.0055396 | 0.0232663 | 903        | 2                             | 0                               | 2                               |
| DMA  | 2009 | country | 2_Amr   | Dominica | 17  | 4    | 21   | 0.0185881 | 0.0043737 | 0.0229618 | 915        | 2                             | 1                               | 3                               |
| DMA  | 2010 | country | 2_Amr   | Dominica | 17  | 5    | 22   | 0.019514  | 0.0057394 | 0.0252534 | 871        | 0                             | 2                               | 2                               |
| DMA  | 2011 | country | 2_Amr   | Dominica | 18  | 5    | 23   | 0.0205029 | 0.0056953 | 0.0261982 | 878        | 4                             | 1                               | 6                               |
| DMA  | 2012 | country | 2_Amr   | Dominica | 19  | 5    | 24   | 0.0215613 | 0.005674  | 0.0272353 | 881        | 2                             | 1                               | 3                               |
| DMA  | 2013 | country | 2_Amr   | Dominica | 20  | 5    | 25   | 0.0226329 | 0.0056582 | 0.0282912 | 884        | 3                             | 1                               | 3                               |
| DMA  | 2014 | country | 2_Amr   | Dominica | 22  | 5    | 27   | 0.0236542 | 0.005376  | 0.0290302 | 930        | 1                             | 2                               | 3                               |
| DMA  | 2015 | country | 2_Amr   | Dominica | 23  | 5    | 28   | 0.0246097 | 0.0053499 | 0.0299596 | 935        | 3                             | 2                               | 5                               |
| DMA  | 2016 | country | 2_Amr   | Dominica | 24  | 6    | 30   | 0.0255415 | 0.0063854 | 0.0319269 | 940        | 3                             | 2                               | 4                               |
| DMA  | 2017 | country | 2_Amr   | Dominica | 25  | 6    | 31   | 0.0264119 | 0.0063389 | 0.0327508 | 947        | 3                             | 2                               | 4                               |
| DMA  | 2018 | country | 2_Amr   | Dominica | 26  | 6    | 32   | 0.0272798 | 0.0062953 | 0.0335752 | 953        | 3                             | 2                               | 5                               |
| DMA  | 2019 | country | 2_Amr   | Dominica | 27  | 6    | 33   | 0.0280823 | 0.0062405 | 0.0343228 | 961        | 3                             | 2                               | 5                               |

| iso3 | year | level   | whoreg6 | whoname           | nnd  | pnd  | u5d  | nmr       | pnmr      | u5mr      | Livebirths | Neonatal birth defects deaths | 1-59 month birth defects deaths | Under five birth defects deaths |
|------|------|---------|---------|-------------------|------|------|------|-----------|-----------|-----------|------------|-------------------------------|---------------------------------|---------------------------------|
| DNK  | 2000 | country | 4_Eur   | Denmark           | 230  | 146  | 376  | 0.0034979 | 0.0022204 | 0.0057182 | 65755      | 72                            | 53                              | 124                             |
| DNK  | 2001 | country | 4_Eur   | Denmark           | 219  | 150  | 369  | 0.0033456 | 0.0022915 | 0.0056371 | 65459      | 64                            | 45                              | 109                             |
| DNK  | 2002 | country | 4_Eur   | Denmark           | 211  | 149  | 360  | 0.0032396 | 0.0022877 | 0.0055273 | 65131      | 71                            | 46                              | 117                             |
| DNK  | 2003 | country | 4_Eur   | Denmark           | 206  | 143  | 349  | 0.0031683 | 0.0021993 | 0.0053676 | 65019      | 63                            | 58                              | 121                             |
| DNK  | 2004 | country | 4_Eur   | Denmark           | 202  | 134  | 336  | 0.0031175 | 0.0020268 | 0.0051855 | 64796      | 50                            | 51                              | 101                             |
| DNK  | 2005 | country | 4_Eur   | Denmark           | 199  | 123  | 322  | 0.0030671 | 0.0018957 | 0.0049628 | 64883      | 57                            | 36                              | 93                              |
| DNK  | 2006 | country | 4_Eur   | Denmark           | 193  | 115  | 308  | 0.0029874 | 0.0017801 | 0.0047675 | 64604      | 53                            | 44                              | 97                              |
| DNK  | 2007 | country | 4_Eur   | Denmark           | 186  | 107  | 293  | 0.0029012 | 0.001669  | 0.0045702 | 64111      | 48                            | 36                              | 83                              |
| DNK  | 2008 | country | 4_Eur   | Denmark           | 179  | 99   | 278  | 0.0028335 | 0.0015671 | 0.0044006 | 63174      | 39                            | 39                              | 77                              |
| DNK  | 2009 | country | 4_Eur   | Denmark           | 176  | 89   | 265  | 0.0028156 | 0.0014238 | 0.0042394 | 62509      | 27                            | 24                              | 50                              |
| DNK  | 2010 | country | 4_Eur   | Denmark           | 175  | 80   | 255  | 0.0028478 | 0.0013018 | 0.0041496 | 61452      | 36                            | 26                              | 63                              |
| DNK  | 2011 | country | 4_Eur   | Denmark           | 178  | 70   | 248  | 0.0029467 | 0.0011588 | 0.0041056 | 60406      | 34                            | 23                              | 57                              |
| DNK  | 2012 | country | 4_Eur   | Denmark           | 183  | 61   | 244  | 0.0030773 | 0.0010258 | 0.0041031 | 59468      | 34                            | 20                              | 54                              |
| DNK  | 2013 | country | 4_Eur   | Denmark           | 188  | 55   | 243  | 0.0031835 | 0.0009314 | 0.0041149 | 59054      | 37                            | 18                              | 55                              |
| DNK  | 2014 | country | 4_Eur   | Denmark           | 191  | 51   | 242  | 0.0032453 | 0.0008666 | 0.0041119 | 58854      | 36                            | 17                              | 53                              |
| DNK  | 2015 | country | 4_Eur   | Denmark           | 193  | 49   | 242  | 0.003256  | 0.0008267 | 0.0040827 | 59275      | 37                            | 16                              | 53                              |
| DNK  | 2016 | country | 4_Eur   | Denmark           | 194  | 47   | 241  | 0.0032508 | 0.0007876 | 0.0040383 | 59678      | 37                            | 16                              | 53                              |
| DNK  | 2017 | country | 4_Eur   | Denmark           | 193  | 46   | 239  | 0.0031899 | 0.0007603 | 0.0039502 | 60503      | 37                            | 15                              | 52                              |
| DNK  | 2018 | country | 4_Eur   | Denmark           | 191  | 45   | 236  | 0.0031045 | 0.0007314 | 0.0038359 | 61524      | 36                            | 15                              | 51                              |
| DNK  | 2019 | country | 4_Eur   | Denmark           | 187  | 45   | 232  | 0.0029978 | 0.0007214 | 0.0037192 | 62378      | 36                            | 15                              | 50                              |
| DOM  | 2000 | country | 2_Amr   | Dominican Republi | 4908 | 3610 | 8518 | 0.0233865 | 0.0172016 | 0.0405881 | 209864     | 513                           | 311                             | 824                             |
| DOM  | 2001 | country | 2_Amr   | Dominican Republi | 4870 | 3401 | 8271 | 0.023252  | 0.0162382 | 0.0394902 | 209445     | 517                           | 320                             | 837                             |
| DOM  | 2002 | country | 2_Amr   | Dominican Republi | 4828 | 3233 | 8061 | 0.0230996 | 0.0154683 | 0.0385678 | 209008     | 516                           | 299                             | 815                             |
| DOM  | 2003 | country | 2_Amr   | Dominican Republi | 4796 | 3079 | 7875 | 0.0229939 | 0.0147619 | 0.0377558 | 208578     | 529                           | 273                             | 803                             |
| DOM  | 2004 | country | 2_Amr   | Dominican Republi | 4774 | 2933 | 7707 | 0.022941  | 0.0140942 | 0.0370352 | 208100     | 532                           | 255                             | 786                             |
| DOM  | 2005 | country | 2_Amr   | Dominican Republi | 4758 | 2808 | 7566 | 0.0229123 | 0.013522  | 0.0364343 | 207661     | 523                           | 237                             | 760                             |
| DOM  | 2006 | country | 2_Amr   | Dominican Republi | 4752 | 2685 | 7437 | 0.0229181 | 0.0129493 | 0.0358674 | 207347     | 533                           | 240                             | 774                             |
| DOM  | 2007 | country | 2_Amr   | Dominican Republi | 4749 | 2575 | 7324 | 0.0229263 | 0.0124311 | 0.0353574 | 207142     | 528                           | 239                             | 767                             |
| DOM  | 2008 | country | 2_Amr   | Dominican Republi | 4740 | 2480 | 7220 | 0.0228888 | 0.0119756 | 0.0348644 | 207088     | 544                           | 241                             | 785                             |
| DOM  | 2009 | country | 2_Amr   | Dominican Republi | 4730 | 2401 | 7131 | 0.0228249 | 0.0115862 | 0.0344111 | 207230     | 535                           | 247                             | 783                             |
| DOM  | 2010 | country | 2_Amr   | Dominican Republi | 4721 | 2330 | 7051 | 0.0227534 | 0.0112297 | 0.033983  | 207486     | 543                           | 254                             | 797                             |
| DOM  | 2011 | country | 2_Amr   | Dominican Republi | 4704 | 2273 | 6977 | 0.0226273 | 0.0109336 | 0.0335609 | 207890     | 532                           | 266                             | 798                             |
| DOM  | 2012 | country | 2_Amr   | Dominican Republi | 4670 | 2230 | 6900 | 0.0224228 | 0.0107072 | 0.03313   | 208271     | 541                           | 275                             | 816                             |
| DOM  | 2013 | country | 2_Amr   | Dominican Republi | 4626 | 2167 | 6793 | 0.0221712 | 0.0103858 | 0.032557  | 208649     | 523                           | 263                             | 786                             |
| DOM  | 2014 | country | 2_Amr   | Dominican Republi | 4563 | 2104 | 6667 | 0.0218446 | 0.0100726 | 0.0319172 | 208884     | 526                           | 294                             | 820                             |
| DOM  | 2015 | country | 2_Amr   | Dominican Republi | 4473 | 2037 | 6510 | 0.0214093 | 0.0097498 | 0.031159  | 208928     | 519                           | 298                             | 816                             |
| DOM  | 2016 | country | 2_Amr   | Dominican Republi | 4372 | 1970 | 6342 | 0.0209519 | 0.0094408 | 0.0303927 | 208668     | 503                           | 284                             | 787                             |
| DOM  | 2017 | country | 2_Amr   | Dominican Republi | 4268 | 1892 | 6160 | 0.0205083 | 0.0090913 | 0.0295996 | 208111     | 508                           | 293                             | 801                             |
| DOM  | 2018 | country | 2_Amr   | Dominican Republi | 4138 | 1834 | 5972 | 0.0199735 | 0.0088524 | 0.0288259 | 207175     | 487                           | 315                             | 802                             |
| DOM  | 2019 | country | 2_Amr   | Dominican Republi | 3989 | 1779 | 5768 | 0.0193673 | 0.0086373 | 0.0280046 | 205966     | 479                           | 310                             | 789                             |

| iso3 | year | level   | whoreg6 | whoname | nnd   | pnd   | u5d   | nmr       | pnmr      | u5mr      | Livebirths | Neonatal birth defects deaths | 1-59 month birth defects deaths | Under five birth defects deaths |
|------|------|---------|---------|---------|-------|-------|-------|-----------|-----------|-----------|------------|-------------------------------|---------------------------------|---------------------------------|
| DZA  | 2000 | country | 1_Afr   | Algeria | 12772 | 12099 | 24871 | 0.021049  | 0.01994   | 0.040989  | 606775     | 1349                          | 1286                            | 2635                            |
| DZA  | 2001 | country | 1_Afr   | Algeria | 12654 | 11703 | 24357 | 0.0208824 | 0.0193127 | 0.0401952 | 605964     | 1361                          | 1311                            | 2672                            |
| DZA  | 2002 | country | 1_Afr   | Algeria | 12685 | 11296 | 23981 | 0.020635  | 0.0183748 | 0.0390099 | 614731     | 1365                          | 1207                            | 2571                            |
| DZA  | 2003 | country | 1_Afr   | Algeria | 12888 | 11876 | 24764 | 0.0203766 | 0.0187768 | 0.0391534 | 632492     | 1376                          | 1234                            | 2610                            |
| DZA  | 2004 | country | 1_Afr   | Algeria | 13246 | 8846  | 22092 | 0.0201191 | 0.0134359 | 0.0335551 | 658378     | 1425                          | 1110                            | 2535                            |
| DZA  | 2005 | country | 1_Afr   | Algeria | 13736 | 8350  | 22086 | 0.0198772 | 0.012083  | 0.0319602 | 691044     | 1520                          | 1131                            | 2651                            |
| DZA  | 2006 | country | 1_Afr   | Algeria | 14325 | 7911  | 22236 | 0.0196558 | 0.0108548 | 0.0305106 | 728792     | 1629                          | 1256                            | 2886                            |
| DZA  | 2007 | country | 1_Afr   | Algeria | 14896 | 7574  | 22470 | 0.0193669 | 0.0098476 | 0.0292144 | 769149     | 1784                          | 1255                            | 3038                            |
| DZA  | 2008 | country | 1_Afr   | Algeria | 15300 | 7441  | 22741 | 0.0189004 | 0.0091924 | 0.0280929 | 809506     | 1939                          | 1244                            | 3183                            |
| DZA  | 2009 | country | 1_Afr   | Algeria | 15414 | 7599  | 23013 | 0.018174  | 0.0089599 | 0.0271339 | 848137     | 2056                          | 1353                            | 3408                            |
| DZA  | 2010 | country | 1_Afr   | Algeria | 15477 | 7818  | 23295 | 0.0175113 | 0.0088457 | 0.026357  | 883829     | 2159                          | 1443                            | 3602                            |
| DZA  | 2011 | country | 1_Afr   | Algeria | 15703 | 7927  | 23630 | 0.0171369 | 0.0086506 | 0.0257875 | 916327     | 2287                          | 1483                            | 3770                            |
| DZA  | 2012 | country | 1_Afr   | Algeria | 15961 | 8051  | 24012 | 0.0168708 | 0.0085095 | 0.0253802 | 946075     | 2468                          | 1525                            | 3993                            |
| DZA  | 2013 | country | 1_Afr   | Algeria | 15952 | 8480  | 24432 | 0.0163972 | 0.0087171 | 0.0251143 | 972846     | 2531                          | 1626                            | 4157                            |
| DZA  | 2014 | country | 1_Afr   | Algeria | 15574 | 9206  | 24780 | 0.015639  | 0.0092445 | 0.0248835 | 995844     | 2571                          | 1794                            | 4365                            |
| DZA  | 2015 | country | 1_Afr   | Algeria | 15251 | 9779  | 25030 | 0.0150486 | 0.0096491 | 0.0246977 | 1013453    | 2559                          | 1932                            | 4491                            |
| DZA  | 2016 | country | 1_Afr   | Algeria | 15430 | 9620  | 25050 | 0.0150662 | 0.009393  | 0.0244591 | 1024149    | 2595                          | 1921                            | 4516                            |
| DZA  | 2017 | country | 1_Afr   | Algeria | 15965 | 8844  | 24809 | 0.01554   | 0.0086085 | 0.0241485 | 1027349    | 2671                          | 1785                            | 4456                            |
| DZA  | 2018 | country | 1_Afr   | Algeria | 16407 | 7901  | 24308 | 0.0160343 | 0.0077213 | 0.0237557 | 1023242    | 2736                          | 1620                            | 4356                            |
| DZA  | 2019 | country | 1_Afr   | Algeria | 16484 | 7139  | 23623 | 0.0162836 | 0.0070525 | 0.0233361 | 1012309    | 2728                          | 1486                            | 4213                            |
| ECU  | 2000 | country | 2_Amr   | Ecuador | 4675  | 4618  | 9293  | 0.0144736 | 0.0142972 | 0.0287708 | 323001     | 1164                          | 1020                            | 2184                            |
| ECU  | 2001 | country | 2_Amr   | Ecuador | 4395  | 4381  | 8776  | 0.0136436 | 0.0136001 | 0.0272437 | 322129     | 1094                          | 965                             | 2059                            |
| ECU  | 2002 | country | 2_Amr   | Ecuador | 4156  | 4161  | 8317  | 0.0129437 | 0.0129593 | 0.025903  | 321083     | 1034                          | 919                             | 1953                            |
| ECU  | 2003 | country | 2_Amr   | Ecuador | 3950  | 3963  | 7913  | 0.012344  | 0.0123846 | 0.0247286 | 319994     | 983                           | 877                             | 1860                            |
| ECU  | 2004 | country | 2_Amr   | Ecuador | 3765  | 3799  | 7564  | 0.0117991 | 0.0119056 | 0.0237047 | 319093     | 937                           | 841                             | 1778                            |
| ECU  | 2005 | country | 2_Amr   | Ecuador | 3607  | 3628  | 7235  | 0.011321  | 0.0113869 | 0.0227079 | 318612     | 897                           | 804                             | 1702                            |
| ECU  | 2006 | country | 2_Amr   | Ecuador | 3463  | 3470  | 6933  | 0.0108723 | 0.0108943 | 0.0217666 | 318515     | 862                           | 770                             | 1632                            |
| ECU  | 2007 | country | 2_Amr   | Ecuador | 3324  | 3322  | 6646  | 0.0104265 | 0.0104202 | 0.0208467 | 318803     | 828                           | 737                             | 1565                            |
| ECU  | 2008 | country | 2_Amr   | Ecuador | 3198  | 3171  | 6369  | 0.0100052 | 0.0099207 | 0.0199259 | 319634     | 795                           | 704                             | 1498                            |
| ECU  | 2009 | country | 2_Amr   | Ecuador | 3082  | 3022  | 6104  | 0.0096087 | 0.0094217 | 0.0190304 | 320750     | 768                           | 671                             | 1438                            |
| ECU  | 2010 | country | 2_Amr   | Ecuador | 2978  | 2876  | 5854  | 0.0092398 | 0.0089233 | 0.0181631 | 322302     | 743                           | 638                             | 1382                            |
| ECU  | 2011 | country | 2_Amr   | Ecuador | 2888  | 2735  | 5623  | 0.0089104 | 0.0084383 | 0.0173487 | 324117     | 713                           | 607                             | 1320                            |
| ECU  | 2012 | country | 2_Amr   | Ecuador | 2809  | 2612  | 5421  | 0.0086104 | 0.0080066 | 0.016617  | 326232     | 705                           | 580                             | 1285                            |
| ECU  | 2013 | country | 2_Amr   | Ecuador | 2739  | 2503  | 5242  | 0.0083414 | 0.0076227 | 0.0159641 | 328361     | 688                           | 556                             | 1243                            |
| ECU  | 2014 | country | 2_Amr   | Ecuador | 2679  | 2417  | 5096  | 0.0081079 | 0.007315  | 0.0154229 | 330419     | 639                           | 537                             | 1175                            |
| ECU  | 2015 | country | 2_Amr   | Ecuador | 2621  | 2363  | 4984  | 0.0078862 | 0.0071099 | 0.0149961 | 332353     | 690                           | 548                             | 1238                            |
| ECU  | 2016 | country | 2_Amr   | Ecuador | 2562  | 2336  | 4898  | 0.0076695 | 0.0069929 | 0.0146624 | 334051     | 645                           | 532                             | 1176                            |
| ECU  | 2017 | country | 2_Amr   | Ecuador | 2501  | 2334  | 4835  | 0.0074575 | 0.0069595 | 0.014417  | 335368     | 628                           | 530                             | 1158                            |
| ECU  | 2018 | country | 2_Amr   | Ecuador | 2438  | 2336  | 4774  | 0.0072471 | 0.0069439 | 0.014191  | 336411     | 623                           | 531                             | 1153                            |
| ECU  | 2019 | country | 2_Amr   | Ecuador | 2379  | 2317  | 4696  | 0.0070573 | 0.0068734 | 0.0139306 | 337099     | 601                           | 526                             | 1127                            |

| iso3 | year | level   | whoreg6 | whoname | nnd   | pnd   | u5d   | nmr       | pnmr      | u5mr      | Livebirths | Neonatal birth defects deaths | 1-59 month birth defects deaths | Under five birth defects deaths |
|------|------|---------|---------|---------|-------|-------|-------|-----------|-----------|-----------|------------|-------------------------------|---------------------------------|---------------------------------|
| EGY  | 2000 | country | 5_Emr   | Egypt   | 39847 | 43586 | 83433 | 0.0223113 | 0.024405  | 0.0467163 | 1785959    | 3360                          | 5376                            | 8736                            |
| EGY  | 2001 | country | 5_Emr   | Egypt   | 38589 | 40023 | 78612 | 0.0215232 | 0.0223231 | 0.0438463 | 1792904    | 3352                          | 5034                            | 8386                            |
| EGY  | 2002 | country | 5_Emr   | Egypt   | 37491 | 36537 | 74028 | 0.0207917 | 0.0202625 | 0.0410542 | 1803168    | 3348                          | 4818                            | 8166                            |
| EGY  | 2003 | country | 5_Emr   | Egypt   | 36552 | 33865 | 70417 | 0.0201017 | 0.018624  | 0.0387257 | 1818358    | 3350                          | 4726                            | 8076                            |
| EGY  | 2004 | country | 5_Emr   | Egypt   | 35842 | 31846 | 67688 | 0.0194759 | 0.0173046 | 0.0367805 | 1840330    | 3545                          | 4451                            | 7996                            |
| EGY  | 2005 | country | 5_Emr   | Egypt   | 35400 | 30167 | 65567 | 0.0188935 | 0.0161004 | 0.034994  | 1873657    | 3808                          | 4378                            | 8186                            |
| EGY  | 2006 | country | 5_Emr   | Egypt   | 35227 | 29567 | 64794 | 0.0183137 | 0.0153714 | 0.0336851 | 1923533    | 4098                          | 4274                            | 8372                            |
| EGY  | 2007 | country | 5_Emr   | Egypt   | 35290 | 28740 | 64030 | 0.0177234 | 0.0144338 | 0.0321572 | 1991151    | 4449                          | 4235                            | 8684                            |
| EGY  | 2008 | country | 5_Emr   | Egypt   | 35564 | 27462 | 63026 | 0.0171407 | 0.0132358 | 0.0303765 | 2074825    | 4787                          | 4114                            | 8901                            |
| EGY  | 2009 | country | 5_Emr   | Egypt   | 35945 | 26888 | 62833 | 0.0165586 | 0.0123865 | 0.028945  | 2170779    | 5220                          | 4520                            | 9740                            |
| EGY  | 2010 | country | 5_Emr   | Egypt   | 36190 | 26422 | 62612 | 0.015929  | 0.0116297 | 0.0275587 | 2271956    | 5629                          | 4909                            | 10538                           |
| EGY  | 2011 | country | 5_Emr   | Egypt   | 36054 | 26555 | 62609 | 0.0152156 | 0.0112069 | 0.0264225 | 2369547    | 5906                          | 5357                            | 11263                           |
| EGY  | 2012 | country | 5_Emr   | Egypt   | 35686 | 26821 | 62507 | 0.0145326 | 0.0109224 | 0.025455  | 2455589    | 6299                          | 5826                            | 12126                           |
| EGY  | 2013 | country | 5_Emr   | Egypt   | 35119 | 26919 | 62038 | 0.0139138 | 0.010665  | 0.0245788 | 2524040    | 6482                          | 6373                            | 12854                           |
| EGY  | 2014 | country | 5_Emr   | Egypt   | 34357 | 27174 | 61531 | 0.0133585 | 0.0105655 | 0.023924  | 2571911    | 6718                          | 6938                            | 13656                           |
| EGY  | 2015 | country | 5_Emr   | Egypt   | 33391 | 27707 | 61098 | 0.0128499 | 0.0106623 | 0.0235122 | 2598551    | 6753                          | 7102                            | 13855                           |
| EGY  | 2016 | country | 5_Emr   | Egypt   | 32326 | 25973 | 58299 | 0.0124036 | 0.009966  | 0.0223696 | 2606187    | 6788                          | 7187                            | 13975                           |
| EGY  | 2017 | country | 5_Emr   | Egypt   | 31104 | 25185 | 56289 | 0.0119562 | 0.0096811 | 0.0216373 | 2601496    | 6994                          | 7188                            | 14183                           |
| EGY  | 2018 | country | 5_Emr   | Egypt   | 29877 | 24500 | 54377 | 0.0115328 | 0.0094574 | 0.0209902 | 2590605    | 6726                          | 7174                            | 13900                           |
| EGY  | 2019 | country | 5_Emr   | Egypt   | 28710 | 23555 | 52265 | 0.0111415 | 0.0091412 | 0.0202827 | 2576850    | 6681                          | 7066                            | 13747                           |
| ERI  | 2000 | country | 1_Afr   | Eritrea | 2047  | 4414  | 6461  | 0.02653   | 0.0572032 | 0.0837333 | 77158      | 94                            | 87                              | 182                             |
| ERI  | 2001 | country | 1_Afr   | Eritrea | 2113  | 4327  | 6440  | 0.0260785 | 0.0534029 | 0.0794815 | 81025      | 99                            | 108                             | 207                             |
| ERI  | 2002 | country | 1_Afr   | Eritrea | 2204  | 3866  | 6070  | 0.0256644 | 0.045018  | 0.0706824 | 85878      | 107                           | 111                             | 218                             |
| ERI  | 2003 | country | 1_Afr   | Eritrea | 2301  | 3773  | 6074  | 0.0252299 | 0.0413655 | 0.0665954 | 91201      | 113                           | 144                             | 258                             |
| ERI  | 2004 | country | 1_Afr   | Eritrea | 2396  | 3493  | 5889  | 0.0247839 | 0.0361263 | 0.0609102 | 96676      | 121                           | 169                             | 290                             |
| ERI  | 2005 | country | 1_Afr   | Eritrea | 2476  | 3579  | 6055  | 0.0243112 | 0.035137  | 0.0594482 | 101846     | 127                           | 176                             | 302                             |
| ERI  | 2006 | country | 1_Afr   | Eritrea | 2534  | 3906  | 6440  | 0.023836  | 0.0367426 | 0.0605785 | 106310     | 132                           | 187                             | 319                             |
| ERI  | 2007 | country | 1_Afr   | Eritrea | 2561  | 3718  | 6279  | 0.0233272 | 0.0338625 | 0.0571897 | 109786     | 135                           | 204                             | 340                             |
| ERI  | 2008 | country | 1_Afr   | Eritrea | 2557  | 3650  | 6207  | 0.0227819 | 0.0325194 | 0.0553012 | 112238     | 137                           | 218                             | 355                             |
| ERI  | 2009 | country | 1_Afr   | Eritrea | 2521  | 3769  | 6290  | 0.0222    | 0.033193  | 0.055393  | 113558     | 140                           | 232                             | 372                             |
| ERI  | 2010 | country | 1_Afr   | Eritrea | 2465  | 3589  | 6054  | 0.0216602 | 0.0315405 | 0.0532007 | 113803     | 141                           | 233                             | 374                             |
| ERI  | 2011 | country | 1_Afr   | Eritrea | 2396  | 3526  | 5922  | 0.021178  | 0.031163  | 0.052341  | 113137     | 141                           | 238                             | 378                             |
| ERI  | 2012 | country | 1_Afr   | Eritrea | 2321  | 3799  | 6120  | 0.0207311 | 0.0339313 | 0.0546625 | 111957     | 141                           | 235                             | 376                             |
| ERI  | 2013 | country | 1_Afr   | Eritrea | 2241  | 3281  | 5522  | 0.0202631 | 0.0296624 | 0.0499255 | 110595     | 137                           | 209                             | 346                             |
| ERI  | 2014 | country | 1_Afr   | Eritrea | 2165  | 3345  | 5510  | 0.0198251 | 0.0306313 | 0.0504564 | 109205     | 136                           | 185                             | 320                             |
| ERI  | 2015 | country | 1_Afr   | Eritrea | 2095  | 3391  | 5486  | 0.0194048 | 0.0314082 | 0.0508131 | 107963     | 142                           | 215                             | 357                             |
| ERI  | 2016 | country | 1_Afr   | Eritrea | 2030  | 3074  | 5104  | 0.018988  | 0.0287555 | 0.0477435 | 106910     | 144                           | 237                             | 381                             |
| ERI  | 2017 | country | 1_Afr   | Eritrea | 1968  | 3529  | 5497  | 0.0185757 | 0.0333068 | 0.0518825 | 105945     | 149                           | 227                             | 376                             |
| ERI  | 2018 | country | 1_Afr   | Eritrea | 1912  | 2741  | 4653  | 0.0181846 | 0.0260711 | 0.0442557 | 105144     | 150                           | 220                             | 370                             |
| ERI  | 2019 | country | 1_Afr   | Eritrea | 1863  | 2218  | 4081  | 0.017823  | 0.0212233 | 0.0390463 | 104528     | 152                           | 202                             | 354                             |

| iso3 | year | level   | whoreg6 | whoname | nnd  | pnd  | u5d  | nmr       | pnmr      | u5mr      | Livebirths | Neonatal birth defects deaths | 1-59 month birth defects deaths | Under five birth defects deaths |
|------|------|---------|---------|---------|------|------|------|-----------|-----------|-----------|------------|-------------------------------|---------------------------------|---------------------------------|
| ESP  | 2000 | country | 4_Eur   | Spain   | 1123 | 996  | 2119 | 0.0028266 | 0.0025069 | 0.0053335 | 397302     | 366                           | 385                             | 751                             |
| ESP  | 2001 | country | 4_Eur   | Spain   | 1139 | 972  | 2111 | 0.0027766 | 0.0023695 | 0.0051461 | 410217     | 336                           | 362                             | 699                             |
| ESP  | 2002 | country | 4_Eur   | Spain   | 1148 | 976  | 2124 | 0.0026948 | 0.0022911 | 0.0049859 | 426001     | 347                           | 345                             | 692                             |
| ESP  | 2003 | country | 4_Eur   | Spain   | 1155 | 993  | 2148 | 0.0026003 | 0.0022356 | 0.0048359 | 444175     | 373                           | 318                             | 691                             |
| ESP  | 2004 | country | 4_Eur   | Spain   | 1163 | 1007 | 2170 | 0.002513  | 0.0021759 | 0.0046889 | 462797     | 300                           | 368                             | 668                             |
| ESP  | 2005 | country | 4_Eur   | Spain   | 1166 | 1016 | 2182 | 0.0024301 | 0.0021174 | 0.0045475 | 479823     | 327                           | 352                             | 679                             |
| ESP  | 2006 | country | 4_Eur   | Spain   | 1153 | 1020 | 2173 | 0.002338  | 0.0020684 | 0.0044064 | 493146     | 337                           | 335                             | 672                             |
| ESP  | 2007 | country | 4_Eur   | Spain   | 1123 | 1018 | 2141 | 0.0022396 | 0.0020302 | 0.0042699 | 501421     | 289                           | 304                             | 593                             |
| ESP  | 2008 | country | 4_Eur   | Spain   | 1089 | 995  | 2084 | 0.0021615 | 0.0019749 | 0.0041364 | 503815     | 296                           | 337                             | 633                             |
| ESP  | 2009 | country | 4_Eur   | Spain   | 1064 | 941  | 2005 | 0.0021269 | 0.001881  | 0.004008  | 500253     | 257                           | 296                             | 553                             |
| ESP  | 2010 | country | 4_Eur   | Spain   | 1042 | 866  | 1908 | 0.0021204 | 0.0017622 | 0.0038826 | 491420     | 310                           | 285                             | 595                             |
| ESP  | 2011 | country | 4_Eur   | Spain   | 1009 | 793  | 1802 | 0.0021091 | 0.0016576 | 0.0037667 | 478405     | 291                           | 294                             | 585                             |
| ESP  | 2012 | country | 4_Eur   | Spain   | 963  | 732  | 1695 | 0.0020791 | 0.0015804 | 0.0036594 | 463187     | 245                           | 224                             | 469                             |
| ESP  | 2013 | country | 4_Eur   | Spain   | 912  | 682  | 1594 | 0.002035  | 0.0015218 | 0.0035568 | 448150     | 230                           | 196                             | 425                             |
| ESP  | 2014 | country | 4_Eur   | Spain   | 861  | 645  | 1506 | 0.0019831 | 0.0014856 | 0.0034686 | 434179     | 220                           | 179                             | 399                             |
| ESP  | 2015 | country | 4_Eur   | Spain   | 815  | 616  | 1431 | 0.0019327 | 0.0014608 | 0.0033935 | 421691     | 195                           | 173                             | 368                             |
| ESP  | 2016 | country | 4_Eur   | Spain   | 778  | 591  | 1369 | 0.001892  | 0.0014372 | 0.0033292 | 411214     | 209                           | 164                             | 374                             |
| ESP  | 2017 | country | 4_Eur   | Spain   | 749  | 568  | 1317 | 0.0018629 | 0.0014127 | 0.0032757 | 402054     | 191                           | 158                             | 349                             |
| ESP  | 2018 | country | 4_Eur   | Spain   | 724  | 545  | 1269 | 0.0018356 | 0.0013818 | 0.0032174 | 394418     | 184                           | 152                             | 336                             |
| ESP  | 2019 | country | 4_Eur   | Spain   | 698  | 523  | 1221 | 0.0018033 | 0.0013512 | 0.0031545 | 387068     | 181                           | 146                             | 327                             |
| EST  | 2000 | country | 4_Eur   | Estonia | 67   | 73   | 140  | 0.0053088 | 0.0057842 | 0.011093  | 12621      | 15                            | 24                              | 39                              |
| EST  | 2001 | country | 4_Eur   | Estonia | 62   | 67   | 129  | 0.0048508 | 0.005242  | 0.0100928 | 12781      | 16                            | 20                              | 36                              |
| EST  | 2002 | country | 4_Eur   | Estonia | 58   | 62   | 120  | 0.0044241 | 0.0047292 | 0.0091533 | 13110      | 19                            | 19                              | 38                              |
| EST  | 2003 | country | 4_Eur   | Estonia | 55   | 57   | 112  | 0.0040361 | 0.0041828 | 0.0082189 | 13627      | 15                            | 18                              | 34                              |
| EST  | 2004 | country | 4_Eur   | Estonia | 52   | 54   | 106  | 0.0036861 | 0.0038279 | 0.007514  | 14107      | 13                            | 16                              | 30                              |
| EST  | 2005 | country | 4_Eur   | Estonia | 49   | 51   | 100  | 0.003364  | 0.0035013 | 0.0068652 | 14566      | 17                            | 11                              | 28                              |
| EST  | 2006 | country | 4_Eur   | Estonia | 46   | 48   | 94   | 0.0030724 | 0.003206  | 0.0062784 | 14972      | 17                            | 18                              | 34                              |
| EST  | 2007 | country | 4_Eur   | Estonia | 42   | 46   | 88   | 0.0028034 | 0.0030704 | 0.0058738 | 14982      | 11                            | 17                              | 27                              |
| EST  | 2008 | country | 4_Eur   | Estonia | 39   | 43   | 82   | 0.0025547 | 0.0028168 | 0.0053715 | 15266      | 14                            | 10                              | 24                              |
| EST  | 2009 | country | 4_Eur   | Estonia | 36   | 39   | 75   | 0.0023929 | 0.0025923 | 0.0049853 | 15044      | 11                            | 10                              | 22                              |
| EST  | 2010 | country | 4_Eur   | Estonia | 32   | 37   | 69   | 0.0021161 | 0.0024467 | 0.0045628 | 15122      | 8                             | 7                               | 14                              |
| EST  | 2011 | country | 4_Eur   | Estonia | 29   | 34   | 63   | 0.0019307 | 0.0022636 | 0.0041943 | 15021      | 10                            | 9                               | 19                              |
| EST  | 2012 | country | 4_Eur   | Estonia | 26   | 32   | 58   | 0.0017743 | 0.0021838 | 0.0039581 | 14653      | 9                             | 11                              | 20                              |
| EST  | 2013 | country | 4_Eur   | Estonia | 24   | 29   | 53   | 0.0016463 | 0.0019893 | 0.0036357 | 14578      | 6                             | 6                               | 12                              |
| EST  | 2014 | country | 4_Eur   | Estonia | 22   | 26   | 48   | 0.0015421 | 0.0018225 | 0.0033646 | 14266      | 7                             | 5                               | 12                              |
| EST  | 2015 | country | 4_Eur   | Estonia | 20   | 24   | 44   | 0.0014517 | 0.0017421 | 0.0031938 | 13777      | 7                             | 4                               | 11                              |
| EST  | 2016 | country | 4_Eur   | Estonia | 18   | 23   | 41   | 0.0012969 | 0.0016572 | 0.0029541 | 13879      | 5                             | 10                              | 15                              |
| EST  | 2017 | country | 4_Eur   | Estonia | 17   | 21   | 38   | 0.0012237 | 0.0015116 | 0.0027353 | 13892      | 5                             | 6                               | 11                              |
| EST  | 2018 | country | 4_Eur   | Estonia | 15   | 20   | 35   | 0.0010832 | 0.0014443 | 0.0025274 | 13848      | 5                             | 5                               | 10                              |
| EST  | 2019 | country | 4_Eur   | Estonia | 14   | 19   | 33   | 0.0010252 | 0.0013913 | 0.0024165 | 13656      | 4                             | 5                               | 9                               |

| iso3 | year | level   | whoreg6 | whoname  | nnd    | pnd    | u5d    | nmr       | pnmr      | u5mr      | Livebirths | Neonatal birth defects deaths | 1-59 month birth defects deaths | Under five birth defects deaths |
|------|------|---------|---------|----------|--------|--------|--------|-----------|-----------|-----------|------------|-------------------------------|---------------------------------|---------------------------------|
| ETH  | 2000 | country | 1_Afr   | Ethiopia | 139801 | 255677 | 395478 | 0.0482399 | 0.0882243 | 0.1364643 | 2898036    | 3782                          | 984                             | 4766                            |
| ETH  | 2001 | country | 1_Afr   | Ethiopia | 138515 | 236342 | 374857 | 0.0473348 | 0.0807652 | 0.1280999 | 2926284    | 3853                          | 996                             | 4849                            |
| ETH  | 2002 | country | 1_Afr   | Ethiopia | 136822 | 239676 | 376498 | 0.0464044 | 0.0812882 | 0.1276926 | 2948470    | 3992                          | 1111                            | 5103                            |
| ETH  | 2003 | country | 1_Afr   | Ethiopia | 134964 | 221058 | 356022 | 0.0454851 | 0.0745002 | 0.1199853 | 2967212    | 3933                          | 1145                            | 5078                            |
| ETH  | 2004 | country | 1_Afr   | Ethiopia | 133056 | 203124 | 336180 | 0.0445822 | 0.0680594 | 0.1126416 | 2984508    | 3958                          | 1193                            | 5152                            |
| ETH  | 2005 | country | 1_Afr   | Ethiopia | 130931 | 187059 | 317990 | 0.0436055 | 0.0622984 | 0.1059039 | 3002625    | 4140                          | 1497                            | 5637                            |
| ETH  | 2006 | country | 1_Afr   | Ethiopia | 128661 | 179841 | 308502 | 0.0425513 | 0.0594777 | 0.102029  | 3023668    | 4150                          | 1143                            | 5293                            |
| ETH  | 2007 | country | 1_Afr   | Ethiopia | 126353 | 156071 | 282424 | 0.0414457 | 0.0511938 | 0.0926395 | 3048638    | 4198                          | 1391                            | 5589                            |
| ETH  | 2008 | country | 1_Afr   | Ethiopia | 124074 | 156703 | 280777 | 0.0403075 | 0.0509074 | 0.0912149 | 3078188    | 4323                          | 2580                            | 6903                            |
| ETH  | 2009 | country | 1_Afr   | Ethiopia | 122027 | 154326 | 276353 | 0.0392013 | 0.0495775 | 0.0887788 | 3112829    | 4292                          | 1895                            | 6187                            |
| ETH  | 2010 | country | 1_Afr   | Ethiopia | 119835 | 134014 | 253849 | 0.03801   | 0.0425072 | 0.0805172 | 3152726    | 4414                          | 2165                            | 6579                            |
| ETH  | 2011 | country | 1_Afr   | Ethiopia | 117547 | 119922 | 237469 | 0.0367633 | 0.0375062 | 0.0742695 | 3197398    | 4492                          | 2519                            | 7011                            |
| ETH  | 2012 | country | 1_Afr   | Ethiopia | 115053 | 113814 | 228867 | 0.0354528 | 0.0350712 | 0.070524  | 3245244    | 4407                          | 2210                            | 6617                            |
| ETH  | 2013 | country | 1_Afr   | Ethiopia | 112613 | 109860 | 222473 | 0.0341813 | 0.0333455 | 0.0675267 | 3294584    | 4444                          | 1821                            | 6266                            |
| ETH  | 2014 | country | 1_Afr   | Ethiopia | 110169 | 119351 | 229520 | 0.0329415 | 0.035687  | 0.0686285 | 3344380    | 4551                          | 2881                            | 7432                            |
| ETH  | 2015 | country | 1_Afr   | Ethiopia | 107799 | 117377 | 225176 | 0.0317646 | 0.0345869 | 0.0663515 | 3393685    | 4682                          | 2606                            | 7288                            |
| ETH  | 2016 | country | 1_Afr   | Ethiopia | 105482 | 97015  | 202497 | 0.0306461 | 0.0281861 | 0.0588323 | 3441935    | 4749                          | 2814                            | 7563                            |
| ETH  | 2017 | country | 1_Afr   | Ethiopia | 103170 | 83728  | 186898 | 0.0295712 | 0.0239987 | 0.0535699 | 3488867    | 4819                          | 4195                            | 9014                            |
| ETH  | 2018 | country | 1_Afr   | Ethiopia | 100960 | 78410  | 179370 | 0.028568  | 0.022187  | 0.0507551 | 3534024    | 4807                          | 2561                            | 7368                            |
| ETH  | 2019 | country | 1_Afr   | Ethiopia | 98795  | 78539  | 177334 | 0.027621  | 0.0219578 | 0.0495789 | 3576804    | 4800                          | 2559                            | 7359                            |
| FIN  | 2000 | country | 4_Eur   | Finland  | 142    | 107    | 249    | 0.0024703 | 0.0018614 | 0.0043317 | 57483      | 55                            | 44                              | 99                              |
| FIN  | 2001 | country | 4_Eur   | Finland  | 136    | 104    | 240    | 0.0023801 | 0.0018201 | 0.0042002 | 57140      | 52                            | 43                              | 94                              |
| FIN  | 2002 | country | 4_Eur   | Finland  | 132    | 101    | 233    | 0.0023024 | 0.0017617 | 0.0040642 | 57330      | 52                            | 26                              | 79                              |
| FIN  | 2003 | country | 4_Eur   | Finland  | 128    | 100    | 228    | 0.0022341 | 0.0017454 | 0.0039795 | 57293      | 47                            | 33                              | 80                              |
| FIN  | 2004 | country | 4_Eur   | Finland  | 125    | 98     | 223    | 0.0021555 | 0.0016899 | 0.0038454 | 57992      | 47                            | 28                              | 75                              |
| FIN  | 2005 | country | 4_Eur   | Finland  | 123    | 94     | 217    | 0.0021115 | 0.0016137 | 0.0037252 | 58252      | 43                            | 28                              | 72                              |
| FIN  | 2006 | country | 4_Eur   | Finland  | 120    | 91     | 211    | 0.0020447 | 0.0015505 | 0.0035952 | 58690      | 44                            | 35                              | 80                              |
| FIN  | 2007 | country | 4_Eur   | Finland  | 116    | 88     | 204    | 0.0019526 | 0.0014813 | 0.0034339 | 59407      | 41                            | 37                              | 78                              |
| FIN  | 2008 | country | 4_Eur   | Finland  | 112    | 84     | 196    | 0.0018815 | 0.0014111 | 0.0032926 | 59527      | 39                            | 22                              | 60                              |
| FIN  | 2009 | country | 4_Eur   | Finland  | 106    | 82     | 188    | 0.0017643 | 0.0013648 | 0.0031292 | 60080      | 37                            | 30                              | 67                              |
| FIN  | 2010 | country | 4_Eur   | Finland  | 100    | 80     | 180    | 0.0016723 | 0.0013378 | 0.0030101 | 59798      | 36                            | 22                              | 58                              |
| FIN  | 2011 | country | 4_Eur   | Finland  | 93     | 78     | 171    | 0.0015633 | 0.0013112 | 0.0028745 | 59490      | 36                            | 22                              | 57                              |
| FIN  | 2012 | country | 4_Eur   | Finland  | 88     | 75     | 163    | 0.0014955 | 0.0012746 | 0.00277   | 58844      | 33                            | 13                              | 46                              |
| FIN  | 2013 | country | 4_Eur   | Finland  | 83     | 71     | 154    | 0.0014358 | 0.0012283 | 0.0026641 | 57806      | 32                            | 25                              | 57                              |
| FIN  | 2014 | country | 4_Eur   | Finland  | 80     | 67     | 147    | 0.0014059 | 0.0011774 | 0.0025833 | 56905      | 29                            | 22                              | 51                              |
| FIN  | 2015 | country | 4_Eur   | Finland  | 77     | 63     | 140    | 0.0014023 | 0.0011473 | 0.0025496 | 54911      | 29                            | 20                              | 49                              |
| FIN  | 2016 | country | 4_Eur   | Finland  | 75     | 60     | 135    | 0.0014002 | 0.0011202 | 0.0025204 | 53563      | 27                            | 20                              | 47                              |
| FIN  | 2017 | country | 4_Eur   | Finland  | 73     | 57     | 130    | 0.0013994 | 0.0010927 | 0.0024921 | 52164      | 26                            | 18                              | 45                              |
| FIN  | 2018 | country | 4_Eur   | Finland  | 71     | 55     | 126    | 0.0013817 | 0.0010703 | 0.002452  | 51387      | 26                            | 18                              | 43                              |
| FIN  | 2019 | country | 4_Eur   | Finland  | 70     | 52     | 122    | 0.0014045 | 0.0010434 | 0.0024479 | 49839      | 25                            | 17                              | 42                              |

| iso3 | year | level   | whoreg6 | whoname | nnd  | pnd  | u5d  | nmr       | pnmr      | u5mr      | Livebirths | Neonatal birth defects deaths | 1-59 month birth defects deaths | Under five birth defects deaths |
|------|------|---------|---------|---------|------|------|------|-----------|-----------|-----------|------------|-------------------------------|---------------------------------|---------------------------------|
| FJI  | 2000 | country | 6_Wpr   | Fiji    | 182  | 276  | 458  | 0.0091018 | 0.0138228 | 0.0229246 | 19996      | 36                            | 57                              | 93                              |
| FJI  | 2001 | country | 6_Wpr   | Fiji    | 182  | 263  | 445  | 0.0091869 | 0.0132823 | 0.0224692 | 19811      | 36                            | 56                              | 92                              |
| FJI  | 2002 | country | 6_Wpr   | Fiji    | 186  | 273  | 459  | 0.0094827 | 0.013903  | 0.0233857 | 19615      | 37                            | 54                              | 91                              |
| FJI  | 2003 | country | 6_Wpr   | Fiji    | 193  | 261  | 454  | 0.0099326 | 0.0134577 | 0.0233903 | 19431      | 38                            | 53                              | 91                              |
| FJI  | 2004 | country | 6_Wpr   | Fiji    | 201  | 241  | 442  | 0.0104269 | 0.0124978 | 0.0229247 | 19277      | 39                            | 51                              | 90                              |
| FJI  | 2005 | country | 6_Wpr   | Fiji    | 207  | 238  | 445  | 0.0108394 | 0.0124532 | 0.0232926 | 19097      | 40                            | 50                              | 90                              |
| FJI  | 2006 | country | 6_Wpr   | Fiji    | 209  | 242  | 451  | 0.01096   | 0.0126745 | 0.0236345 | 19069      | 40                            | 50                              | 90                              |
| FJI  | 2007 | country | 6_Wpr   | Fiji    | 204  | 244  | 448  | 0.0107351 | 0.0128191 | 0.0235541 | 19003      | 39                            | 51                              | 90                              |
| FJI  | 2008 | country | 6_Wpr   | Fiji    | 196  | 252  | 448  | 0.0103229 | 0.0132941 | 0.023617  | 18987      | 38                            | 53                              | 91                              |
| FJI  | 2009 | country | 6_Wpr   | Fiji    | 188  | 261  | 449  | 0.0099181 | 0.0137693 | 0.0236874 | 18955      | 36                            | 55                              | 91                              |
| FJI  | 2010 | country | 6_Wpr   | Fiji    | 183  | 265  | 448  | 0.009611  | 0.0139175 | 0.0235284 | 19041      | 36                            | 56                              | 92                              |
| FJI  | 2011 | country | 6_Wpr   | Fiji    | 180  | 268  | 448  | 0.009429  | 0.0140387 | 0.0234676 | 19090      | 35                            | 57                              | 92                              |
| FJI  | 2012 | country | 6_Wpr   | Fiji    | 180  | 270  | 450  | 0.0093903 | 0.0140855 | 0.0234758 | 19169      | 36                            | 57                              | 93                              |
| FJI  | 2013 | country | 6_Wpr   | Fiji    | 182  | 271  | 453  | 0.0094735 | 0.0141061 | 0.0235795 | 19212      | 36                            | 57                              | 93                              |
| FJI  | 2014 | country | 6_Wpr   | Fiji    | 186  | 272  | 458  | 0.0096687 | 0.0141392 | 0.0238079 | 19237      | 37                            | 57                              | 94                              |
| FJI  | 2015 | country | 6_Wpr   | Fiji    | 191  | 274  | 465  | 0.0099321 | 0.0142481 | 0.0241802 | 19231      | 38                            | 57                              | 95                              |
| FJI  | 2016 | country | 6_Wpr   | Fiji    | 196  | 277  | 473  | 0.0102334 | 0.0144625 | 0.0246959 | 19153      | 38                            | 57                              | 95                              |
| FJI  | 2017 | country | 6_Wpr   | Fiji    | 200  | 279  | 479  | 0.0105231 | 0.0146798 | 0.0252029 | 19006      | 39                            | 56                              | 95                              |
| FJI  | 2018 | country | 6_Wpr   | Fiji    | 202  | 281  | 483  | 0.0107366 | 0.0149356 | 0.0256722 | 18814      | 39                            | 56                              | 95                              |
| FJI  | 2019 | country | 6_Wpr   | Fiji    | 202  | 281  | 483  | 0.0108447 | 0.0150712 | 0.025916  | 18627      | 39                            | 55                              | 94                              |
| FRA  | 2000 | country | 4_Eur   | France  | 2076 | 1953 | 4029 | 0.0027485 | 0.0025857 | 0.0053342 | 755320     | 724                           | 404                             | 1128                            |
| FRA  | 2001 | country | 4_Eur   | France  | 2082 | 1879 | 3961 | 0.0027327 | 0.0024663 | 0.005199  | 761873     | 636                           | 387                             | 1023                            |
| FRA  | 2002 | country | 4_Eur   | France  | 2074 | 1798 | 3872 | 0.0026988 | 0.0023396 | 0.0050384 | 768499     | 564                           | 377                             | 942                             |
| FRA  | 2003 | country | 4_Eur   | France  | 2030 | 1735 | 3765 | 0.0026194 | 0.0022387 | 0.0048581 | 774999     | 628                           | 341                             | 969                             |
| FRA  | 2004 | country | 4_Eur   | France  | 1969 | 1691 | 3660 | 0.0025202 | 0.0021644 | 0.0046846 | 781277     | 583                           | 378                             | 960                             |
| FRA  | 2005 | country | 4_Eur   | France  | 1908 | 1667 | 3575 | 0.0024256 | 0.0021193 | 0.0045449 | 786598     | 552                           | 348                             | 900                             |
| FRA  | 2006 | country | 4_Eur   | France  | 1866 | 1648 | 3514 | 0.0023593 | 0.0020837 | 0.004443  | 790901     | 523                           | 401                             | 924                             |
| FRA  | 2007 | country | 4_Eur   | France  | 1850 | 1623 | 3473 | 0.0023282 | 0.0020426 | 0.0043708 | 794593     | 535                           | 377                             | 912                             |
| FRA  | 2008 | country | 4_Eur   | France  | 1860 | 1587 | 3447 | 0.0023348 | 0.0019922 | 0.004327  | 796626     | 538                           | 342                             | 880                             |
| FRA  | 2009 | country | 4_Eur   | France  | 1858 | 1569 | 3427 | 0.0023291 | 0.0019668 | 0.0042959 | 797732     | 546                           | 354                             | 900                             |
| FRA  | 2010 | country | 4_Eur   | France  | 1814 | 1588 | 3402 | 0.0022768 | 0.0019931 | 0.0042699 | 796734     | 511                           | 454                             | 966                             |
| FRA  | 2011 | country | 4_Eur   | France  | 1754 | 1614 | 3368 | 0.0022115 | 0.002035  | 0.0042465 | 793120     | 454                           | 424                             | 878                             |
| FRA  | 2012 | country | 4_Eur   | France  | 1732 | 1585 | 3317 | 0.0022004 | 0.0020136 | 0.004214  | 787130     | 459                           | 375                             | 834                             |
| FRA  | 2013 | country | 4_Eur   | France  | 1767 | 1486 | 3253 | 0.002268  | 0.0019073 | 0.0041753 | 779109     | 442                           | 390                             | 833                             |
| FRA  | 2014 | country | 4_Eur   | France  | 1812 | 1382 | 3194 | 0.0023563 | 0.0017971 | 0.0041534 | 769014     | 439                           | 365                             | 804                             |
| FRA  | 2015 | country | 4_Eur   | France  | 1826 | 1333 | 3159 | 0.0024088 | 0.0017584 | 0.0041672 | 758058     | 402                           | 394                             | 796                             |
| FRA  | 2016 | country | 4_Eur   | France  | 1822 | 1330 | 3152 | 0.0024387 | 0.0017802 | 0.0042189 | 747121     | 433                           | 364                             | 797                             |
| FRA  | 2017 | country | 4_Eur   | France  | 1833 | 1340 | 3173 | 0.0024852 | 0.0018168 | 0.004302  | 737570     | 427                           | 367                             | 795                             |
| FRA  | 2018 | country | 4_Eur   | France  | 1874 | 1340 | 3214 | 0.00257   | 0.0018377 | 0.0044077 | 729178     | 431                           | 367                             | 799                             |
| FRA  | 2019 | country | 4_Eur   | France  | 1920 | 1331 | 3251 | 0.0026537 | 0.0018396 | 0.0044934 | 723511     | 449                           | 365                             | 813                             |

| iso3 | year | level   | whoreg6 | whoname           | nnd  | pnd  | u5d  | nmr       | pnmr      | u5mr      | Livebirths | Neonatal birth defects deaths | 1-59 month birth defects deaths | Under five birth defects deaths |
|------|------|---------|---------|-------------------|------|------|------|-----------|-----------|-----------|------------|-------------------------------|---------------------------------|---------------------------------|
| FSM  | 2000 | country | 6_Wpr   | Micronesia (Feder | 77   | 95   | 172  | 0.0239761 | 0.0295809 | 0.0535569 | 3212       | 8                             | 9                               | 16                              |
| FSM  | 2001 | country | 6_Wpr   | Micronesia (Feder | 74   | 90   | 164  | 0.0235603 | 0.0286544 | 0.0522148 | 3141       | 7                             | 8                               | 15                              |
| FSM  | 2002 | country | 6_Wpr   | Micronesia (Feder | 71   | 86   | 157  | 0.0231136 | 0.0279968 | 0.0511104 | 3072       | 7                             | 9                               | 16                              |
| FSM  | 2003 | country | 6_Wpr   | Micronesia (Feder | 67   | 82   | 149  | 0.0227007 | 0.0277829 | 0.0504836 | 2951       | 7                             | 9                               | 16                              |
| FSM  | 2004 | country | 6_Wpr   | Micronesia (Feder | 64   | 76   | 140  | 0.0222769 | 0.0264538 | 0.0487307 | 2873       | 7                             | 8                               | 14                              |
| FSM  | 2005 | country | 6_Wpr   | Micronesia (Feder | 61   | 71   | 132  | 0.0218629 | 0.0254469 | 0.0473098 | 2790       | 6                             | 9                               | 15                              |
| FSM  | 2006 | country | 6_Wpr   | Micronesia (Feder | 58   | 66   | 124  | 0.0214276 | 0.0243831 | 0.0458108 | 2707       | 6                             | 7                               | 13                              |
| FSM  | 2007 | country | 6_Wpr   | Micronesia (Feder | 55   | 62   | 117  | 0.0208893 | 0.0235479 | 0.0444372 | 2633       | 6                             | 8                               | 14                              |
| FSM  | 2008 | country | 6_Wpr   | Micronesia (Feder | 53   | 57   | 110  | 0.0203971 | 0.0219366 | 0.0423337 | 2598       | 6                             | 6                               | 12                              |
| FSM  | 2009 | country | 6_Wpr   | Micronesia (Feder | 51   | 54   | 105  | 0.0199126 | 0.0210839 | 0.0409965 | 2561       | 6                             | 6                               | 12                              |
| FSM  | 2010 | country | 6_Wpr   | Micronesia (Feder | 49   | 51   | 100  | 0.0194829 | 0.0202781 | 0.039761  | 2515       | 6                             | 6                               | 11                              |
| FSM  | 2011 | country | 6_Wpr   | Micronesia (Feder | 48   | 48   | 96   | 0.0190274 | 0.0190274 | 0.0380547 | 2523       | 6                             | 7                               | 12                              |
| FSM  | 2012 | country | 6_Wpr   | Micronesia (Feder | 46   | 47   | 93   | 0.0185377 | 0.0189407 | 0.0374784 | 2481       | 5                             | 7                               | 12                              |
| FSM  | 2013 | country | 6_Wpr   | Micronesia (Feder | 45   | 45   | 90   | 0.0180973 | 0.0180973 | 0.0361946 | 2487       | 5                             | 6                               | 12                              |
| FSM  | 2014 | country | 6_Wpr   | Micronesia (Feder | 44   | 43   | 87   | 0.0176474 | 0.0172463 | 0.0348937 | 2493       | 5                             | 5                               | 11                              |
| FSM  | 2015 | country | 6_Wpr   | Micronesia (Feder | 44   | 40   | 84   | 0.0172988 | 0.0157261 | 0.0330249 | 2544       | 6                             | 4                               | 10                              |
| FSM  | 2016 | country | 6_Wpr   | Micronesia (Feder | 43   | 39   | 82   | 0.0169537 | 0.0153766 | 0.0323304 | 2536       | 6                             | 4                               | 10                              |
| FSM  | 2017 | country | 6_Wpr   | Micronesia (Feder | 42   | 38   | 80   | 0.0165286 | 0.0149544 | 0.031483  | 2541       | 6                             | 5                               | 10                              |
| FSM  | 2018 | country | 6_Wpr   | Micronesia (Feder | 42   | 36   | 78   | 0.0161966 | 0.0138828 | 0.0300795 | 2593       | 6                             | 4                               | 10                              |
| FSM  | 2019 | country | 6_Wpr   | Micronesia (Feder | 41   | 34   | 75   | 0.0158625 | 0.0131543 | 0.0290168 | 2585       | 6                             | 4                               | 10                              |
| GAB  | 2000 | country | 1_Afr   | Gabon             | 1166 | 2299 | 3465 | 0.0284673 | 0.0561207 | 0.084588  | 40959      | 78                            | 20                              | 99                              |
| GAB  | 2001 | country | 1_Afr   | Gabon             | 1173 | 3368 | 4541 | 0.0281809 | 0.080925  | 0.1091059 | 41624      | 82                            | 22                              | 104                             |
| GAB  | 2002 | country | 1_Afr   | Gabon             | 1182 | 2985 | 4167 | 0.0278649 | 0.0703705 | 0.0982353 | 42419      | 82                            | 25                              | 107                             |
| GAB  | 2003 | country | 1_Afr   | Gabon             | 1191 | 2816 | 4007 | 0.027491  | 0.0649982 | 0.0924892 | 43323      | 85                            | 30                              | 114                             |
| GAB  | 2004 | country | 1_Afr   | Gabon             | 1207 | 2647 | 3854 | 0.0271824 | 0.0596151 | 0.0867975 | 44404      | 87                            | 34                              | 122                             |
| GAB  | 2005 | country | 1_Afr   | Gabon             | 1225 | 1819 | 3044 | 0.0268182 | 0.0398185 | 0.0666368 | 45678      | 90                            | 38                              | 129                             |
| GAB  | 2006 | country | 1_Afr   | Gabon             | 1246 | 1878 | 3124 | 0.026434  | 0.0398377 | 0.0662717 | 47136      | 92                            | 41                              | 133                             |
| GAB  | 2007 | country | 1_Afr   | Gabon             | 1271 | 1910 | 3181 | 0.02604   | 0.0391347 | 0.0651748 | 48809      | 97                            | 50                              | 147                             |
| GAB  | 2008 | country | 1_Afr   | Gabon             | 1298 | 1755 | 3053 | 0.0256586 | 0.0346925 | 0.0603511 | 50587      | 99                            | 57                              | 156                             |
| GAB  | 2009 | country | 1_Afr   | Gabon             | 1322 | 1765 | 3087 | 0.0251956 | 0.0336446 | 0.0588401 | 52470      | 103                           | 53                              | 156                             |
| GAB  | 2010 | country | 1_Afr   | Gabon             | 1346 | 1784 | 3130 | 0.0247487 | 0.0328047 | 0.0575534 | 54387      | 106                           | 51                              | 157                             |
| GAB  | 2011 | country | 1_Afr   | Gabon             | 1367 | 1813 | 3180 | 0.0242313 | 0.0321431 | 0.0563744 | 56415      | 111                           | 64                              | 175                             |
| GAB  | 2012 | country | 1_Afr   | Gabon             | 1386 | 1832 | 3218 | 0.023728  | 0.0313581 | 0.0550861 | 58412      | 110                           | 60                              | 170                             |
| GAB  | 2013 | country | 1_Afr   | Gabon             | 1402 | 1672 | 3074 | 0.0232404 | 0.0277127 | 0.0509531 | 60326      | 115                           | 56                              | 171                             |
| GAB  | 2014 | country | 1_Afr   | Gabon             | 1412 | 1633 | 3045 | 0.0227196 | 0.0262682 | 0.0489877 | 62149      | 118                           | 44                              | 162                             |
| GAB  | 2015 | country | 1_Afr   | Gabon             | 1416 | 1631 | 3047 | 0.0222157 | 0.0255825 | 0.0477982 | 63739      | 117                           | 53                              | 170                             |
| GAB  | 2016 | country | 1_Afr   | Gabon             | 1412 | 1806 | 3218 | 0.0217079 | 0.0277714 | 0.0494794 | 65045      | 118                           | 50                              | 168                             |
| GAB  | 2017 | country | 1_Afr   | Gabon             | 1398 | 1685 | 3083 | 0.0211632 | 0.0255004 | 0.0466635 | 66058      | 118                           | 51                              | 169                             |
| GAB  | 2018 | country | 1_Afr   | Gabon             | 1382 | 1457 | 2839 | 0.0207081 | 0.0218287 | 0.0425368 | 66737      | 119                           | 47                              | 166                             |
| GAB  | 2019 | country | 1_Afr   | Gabon             | 1359 | 1504 | 2863 | 0.0202478 | 0.0224039 | 0.0426517 | 67118      | 119                           | 46                              | 165                             |

| iso3 | year | level   | whoreg6 | whoname           | nnd  | pnd  | u5d  | nmr       | pnmr      | u5mr      | Livebirths | Neonatal birth defects deaths | 1-59 month birth defects deaths | Under five birth defects deaths |
|------|------|---------|---------|-------------------|------|------|------|-----------|-----------|-----------|------------|-------------------------------|---------------------------------|---------------------------------|
| GBR  | 2000 | country | 4_Eur   | United Kingdom of | 2636 | 1976 | 4612 | 0.0037852 | 0.0028375 | 0.0066227 | 696389     | 586                           | 505                             | 1091                            |
| GBR  | 2001 | country | 4_Eur   | United Kingdom of | 2554 | 1933 | 4487 | 0.0036989 | 0.0027995 | 0.0064984 | 690478     | 677                           | 460                             | 1137                            |
| GBR  | 2002 | country | 4_Eur   | United Kingdom of | 2497 | 1895 | 4392 | 0.0036178 | 0.0027456 | 0.0063633 | 690208     | 639                           | 460                             | 1099                            |
| GBR  | 2003 | country | 4_Eur   | United Kingdom of | 2482 | 1850 | 4332 | 0.0035682 | 0.0026596 | 0.0062278 | 695594     | 626                           | 453                             | 1078                            |
| GBR  | 2004 | country | 4_Eur   | United Kingdom of | 2494 | 1809 | 4303 | 0.0035278 | 0.0025589 | 0.0060867 | 706951     | 594                           | 428                             | 1022                            |
| GBR  | 2005 | country | 4_Eur   | United Kingdom of | 2512 | 1784 | 4296 | 0.0034761 | 0.0024687 | 0.0059448 | 722644     | 653                           | 473                             | 1126                            |
| GBR  | 2006 | country | 4_Eur   | United Kingdom of | 2525 | 1771 | 4296 | 0.0034066 | 0.0023893 | 0.0057959 | 741217     | 658                           | 447                             | 1106                            |
| GBR  | 2007 | country | 4_Eur   | United Kingdom of | 2527 | 1759 | 4286 | 0.0033252 | 0.0023146 | 0.0056399 | 759944     | 673                           | 419                             | 1092                            |
| GBR  | 2008 | country | 4_Eur   | United Kingdom of | 2509 | 1738 | 4247 | 0.0032293 | 0.002237  | 0.0054662 | 776950     | 687                           | 400                             | 1087                            |
| GBR  | 2009 | country | 4_Eur   | United Kingdom of | 2476 | 1702 | 4178 | 0.0031326 | 0.0021533 | 0.0052859 | 790404     | 709                           | 429                             | 1138                            |
| GBR  | 2010 | country | 4_Eur   | United Kingdom of | 2430 | 1650 | 4080 | 0.0030397 | 0.002064  | 0.0051036 | 799433     | 702                           | 407                             | 1109                            |
| GBR  | 2011 | country | 4_Eur   | United Kingdom of | 2373 | 1588 | 3961 | 0.0029533 | 0.0019763 | 0.0049296 | 803519     | 665                           | 392                             | 1057                            |
| GBR  | 2012 | country | 4_Eur   | United Kingdom of | 2305 | 1534 | 3839 | 0.0028672 | 0.0019082 | 0.0047754 | 803914     | 703                           | 387                             | 1090                            |
| GBR  | 2013 | country | 4_Eur   | United Kingdom of | 2235 | 1491 | 3726 | 0.0027882 | 0.00186   | 0.0046482 | 801604     | 629                           | 381                             | 1010                            |
| GBR  | 2014 | country | 4_Eur   | United Kingdom of | 2182 | 1446 | 3628 | 0.002738  | 0.0018144 | 0.0045524 | 796941     | 662                           | 360                             | 1022                            |
| GBR  | 2015 | country | 4_Eur   | United Kingdom of | 2157 | 1391 | 3548 | 0.0027265 | 0.0017583 | 0.0044848 | 791116     | 658                           | 305                             | 963                             |
| GBR  | 2016 | country | 4_Eur   | United Kingdom of | 2154 | 1327 | 3481 | 0.0027446 | 0.0016908 | 0.0044354 | 784825     | 628                           | 350                             | 978                             |
| GBR  | 2017 | country | 4_Eur   | United Kingdom of | 2158 | 1265 | 3423 | 0.0027687 | 0.001623  | 0.0043916 | 779434     | 648                           | 308                             | 956                             |
| GBR  | 2018 | country | 4_Eur   | United Kingdom of | 2156 | 1214 | 3370 | 0.0027807 | 0.0015658 | 0.0043465 | 775343     | 644                           | 296                             | 940                             |
| GBR  | 2019 | country | 4_Eur   | United Kingdom of | 2142 | 1171 | 3313 | 0.0027726 | 0.0015158 | 0.0042884 | 772548     | 636                           | 286                             | 921                             |
| GEO  | 2000 | country | 4_Eur   | Georgia           | 1204 | 831  | 2035 | 0.0224266 | 0.0154788 | 0.0379054 | 53686      | 133                           | 95                              | 229                             |
| GEO  | 2001 | country | 4_Eur   | Georgia           | 1118 | 702  | 1820 | 0.0215325 | 0.0135204 | 0.035053  | 51921      | 126                           | 86                              | 212                             |
| GEO  | 2002 | country | 4_Eur   | Georgia           | 1043 | 588  | 1631 | 0.0204886 | 0.0115506 | 0.0320392 | 50906      | 120                           | 83                              | 203                             |
| GEO  | 2003 | country | 4_Eur   | Georgia           | 975  | 491  | 1466 | 0.0192663 | 0.0097023 | 0.0289687 | 50606      | 117                           | 80                              | 197                             |
| GEO  | 2004 | country | 4_Eur   | Georgia           | 899  | 427  | 1326 | 0.0176833 | 0.0083991 | 0.0260824 | 50839      | 118                           | 81                              | 199                             |
| GEO  | 2005 | country | 4_Eur   | Georgia           | 830  | 375  | 1205 | 0.0160987 | 0.0072735 | 0.0233722 | 51557      | 119                           | 77                              | 196                             |
| GEO  | 2006 | country | 4_Eur   | Georgia           | 769  | 331  | 1100 | 0.0146294 | 0.0062969 | 0.0209263 | 52566      | 122                           | 73                              | 195                             |
| GEO  | 2007 | country | 4_Eur   | Georgia           | 714  | 295  | 1009 | 0.0132759 | 0.0054851 | 0.018761  | 53782      | 127                           | 68                              | 195                             |
| GEO  | 2008 | country | 4_Eur   | Georgia           | 663  | 265  | 928  | 0.0120657 | 0.0048226 | 0.0168883 | 54949      | 126                           | 65                              | 191                             |
| GEO  | 2009 | country | 4_Eur   | Georgia           | 616  | 241  | 857  | 0.0109959 | 0.004302  | 0.0152979 | 56021      | 125                           | 62                              | 187                             |
| GEO  | 2010 | country | 4_Eur   | Georgia           | 574  | 220  | 794  | 0.0101022 | 0.0038719 | 0.0139741 | 56820      | 123                           | 60                              | 183                             |
| GEO  | 2011 | country | 4_Eur   | Georgia           | 534  | 205  | 739  | 0.009325  | 0.0035798 | 0.0129048 | 57265      | 119                           | 58                              | 177                             |
| GEO  | 2012 | country | 4_Eur   | Georgia           | 496  | 197  | 693  | 0.0086164 | 0.0034223 | 0.0120387 | 57564      | 113                           | 57                              | 169                             |
| GEO  | 2013 | country | 4_Eur   | Georgia           | 457  | 198  | 655  | 0.0079459 | 0.0034426 | 0.0113885 | 57514      | 106                           | 59                              | 165                             |
| GEO  | 2014 | country | 4_Eur   | Georgia           | 418  | 207  | 625  | 0.0073037 | 0.0036169 | 0.0109206 | 57231      | 99                            | 62                              | 161                             |
| GEO  | 2015 | country | 4_Eur   | Georgia           | 380  | 219  | 599  | 0.0066887 | 0.0038548 | 0.0105434 | 56813      | 90                            | 67                              | 156                             |
| GEO  | 2016 | country | 4_Eur   | Georgia           | 342  | 235  | 577  | 0.0061146 | 0.0042016 | 0.0103162 | 55931      | 83                            | 72                              | 155                             |
| GEO  | 2017 | country | 4_Eur   | Georgia           | 308  | 248  | 556  | 0.0056025 | 0.0045111 | 0.0101137 | 54975      | 74                            | 77                              | 151                             |
| GEO  | 2018 | country | 4_Eur   | Georgia           | 280  | 255  | 535  | 0.0051927 | 0.0047291 | 0.0099218 | 53922      | 68                            | 79                              | 148                             |
| GEO  | 2019 | country | 4_Eur   | Georgia           | 258  | 255  | 513  | 0.0048825 | 0.0048258 | 0.0097083 | 52841      | 63                            | 80                              | 143                             |

| iso3 | year | level   | whoreg6 | whoname | nnd   | pnd   | u5d   | nmr       | pnmr      | u5mr      | Livebirths | Neonatal birth defects deaths | 1-59 month birth defects deaths | Under five birth defects deaths |
|------|------|---------|---------|---------|-------|-------|-------|-----------|-----------|-----------|------------|-------------------------------|---------------------------------|---------------------------------|
| GHA  | 2000 | country | 1_Afr   | Ghana   | 24858 | 46415 | 71273 | 0.0361186 | 0.0674406 | 0.1035592 | 688232     | 1217                          | 731                             | 1949                            |
| GHA  | 2001 | country | 1_Afr   | Ghana   | 24542 | 42833 | 67375 | 0.0352351 | 0.0614964 | 0.0967315 | 696521     | 1253                          | 631                             | 1884                            |
| GHA  | 2002 | country | 1_Afr   | Ghana   | 24273 | 41027 | 65300 | 0.0344225 | 0.0581815 | 0.0926041 | 705148     | 1251                          | 763                             | 2014                            |
| GHA  | 2003 | country | 1_Afr   | Ghana   | 24104 | 35963 | 60067 | 0.0337383 | 0.0503375 | 0.0840758 | 714441     | 1284                          | 918                             | 2201                            |
| GHA  | 2004 | country | 1_Afr   | Ghana   | 24039 | 35366 | 59405 | 0.0331786 | 0.0488126 | 0.0819911 | 724534     | 1319                          | 1092                            | 2410                            |
| GHA  | 2005 | country | 1_Afr   | Ghana   | 24052 | 34880 | 58932 | 0.0326966 | 0.0474169 | 0.0801135 | 735612     | 1375                          | 1162                            | 2536                            |
| GHA  | 2006 | country | 1_Afr   | Ghana   | 24118 | 34298 | 58416 | 0.0322517 | 0.0458644 | 0.0781161 | 747806     | 1376                          | 843                             | 2219                            |
| GHA  | 2007 | country | 1_Afr   | Ghana   | 24166 | 33206 | 57372 | 0.0317591 | 0.0436393 | 0.0753983 | 760916     | 1411                          | 1140                            | 2550                            |
| GHA  | 2008 | country | 1_Afr   | Ghana   | 24151 | 32417 | 56568 | 0.0311787 | 0.0418496 | 0.0730282 | 774601     | 1435                          | 1337                            | 2773                            |
| GHA  | 2009 | country | 1_Afr   | Ghana   | 24046 | 31368 | 55414 | 0.030492  | 0.0397763 | 0.0702683 | 788600     | 1469                          | 1001                            | 2470                            |
| GHA  | 2010 | country | 1_Afr   | Ghana   | 23883 | 30213 | 54096 | 0.0297663 | 0.0376552 | 0.0674215 | 802350     | 1473                          | 1387                            | 2860                            |
| GHA  | 2011 | country | 1_Afr   | Ghana   | 23634 | 28627 | 52261 | 0.0289838 | 0.0351075 | 0.0640912 | 815422     | 1518                          | 834                             | 2353                            |
| GHA  | 2012 | country | 1_Afr   | Ghana   | 23315 | 27578 | 50893 | 0.0281794 | 0.0333316 | 0.061511  | 827379     | 1512                          | 1236                            | 2748                            |
| GHA  | 2013 | country | 1_Afr   | Ghana   | 22955 | 26227 | 49182 | 0.0273914 | 0.0312954 | 0.0586868 | 838036     | 1528                          | 1013                            | 2541                            |
| GHA  | 2014 | country | 1_Afr   | Ghana   | 22548 | 24741 | 47289 | 0.0266103 | 0.0291979 | 0.0558082 | 847340     | 1529                          | 1246                            | 2775                            |
| GHA  | 2015 | country | 1_Afr   | Ghana   | 22103 | 23653 | 45756 | 0.0258406 | 0.027653  | 0.0534936 | 855359     | 1533                          | 1295                            | 2829                            |
| GHA  | 2016 | country | 1_Afr   | Ghana   | 21660 | 22652 | 44312 | 0.0251142 | 0.0262646 | 0.0513789 | 862459     | 1540                          | 2073                            | 3613                            |
| GHA  | 2017 | country | 1_Afr   | Ghana   | 21213 | 21648 | 42861 | 0.0244111 | 0.0249112 | 0.0493224 | 868989     | 1494                          | 1689                            | 3182                            |
| GHA  | 2018 | country | 1_Afr   | Ghana   | 20788 | 20817 | 41605 | 0.023745  | 0.023778  | 0.047523  | 875467     | 1522                          | 1490                            | 3012                            |
| GHA  | 2019 | country | 1_Afr   | Ghana   | 20399 | 19852 | 40251 | 0.0231268 | 0.0225067 | 0.0456335 | 882051     | 1493                          | 1459                            | 2952                            |
| GIN  | 2000 | country | 1_Afr   | Guinea  | 16520 | 46283 | 62803 | 0.045527  | 0.1275507 | 0.1730776 | 362862     | 627                           | 45                              | 672                             |
| GIN  | 2001 | country | 1_Afr   | Guinea  | 15953 | 46570 | 62523 | 0.0434373 | 0.1268033 | 0.1702406 | 367265     | 641                           | 53                              | 694                             |
| GIN  | 2002 | country | 1_Afr   | Guinea  | 15555 | 40561 | 56116 | 0.0418739 | 0.1091894 | 0.1510633 | 371472     | 636                           | 67                              | 703                             |
| GIN  | 2003 | country | 1_Afr   | Guinea  | 15290 | 38708 | 53998 | 0.0407137 | 0.1030699 | 0.1437836 | 375549     | 657                           | 84                              | 741                             |
| GIN  | 2004 | country | 1_Afr   | Guinea  | 15051 | 34626 | 49677 | 0.0396571 | 0.0912347 | 0.1308918 | 379528     | 665                           | 107                             | 772                             |
| GIN  | 2005 | country | 1_Afr   | Guinea  | 14783 | 34333 | 49116 | 0.0385466 | 0.0895233 | 0.1280699 | 383510     | 662                           | 126                             | 788                             |
| GIN  | 2006 | country | 1_Afr   | Guinea  | 14544 | 33991 | 48535 | 0.0375342 | 0.0877205 | 0.1252546 | 387487     | 670                           | 134                             | 804                             |
| GIN  | 2007 | country | 1_Afr   | Guinea  | 14354 | 32859 | 47213 | 0.0366605 | 0.0839219 | 0.1205823 | 391539     | 676                           | 161                             | 837                             |
| GIN  | 2008 | country | 1_Afr   | Guinea  | 14223 | 32792 | 47015 | 0.0359409 | 0.0828651 | 0.118806  | 395733     | 682                           | 223                             | 906                             |
| GIN  | 2009 | country | 1_Afr   | Guinea  | 14121 | 32805 | 46926 | 0.0352963 | 0.0819992 | 0.1172955 | 400070     | 682                           | 134                             | 815                             |
| GIN  | 2010 | country | 1_Afr   | Guinea  | 14072 | 31691 | 45763 | 0.0347746 | 0.0783141 | 0.1130887 | 404663     | 694                           | 147                             | 841                             |
| GIN  | 2011 | country | 1_Afr   | Guinea  | 14017 | 31761 | 45778 | 0.0342259 | 0.0775531 | 0.111779  | 409543     | 705                           | 161                             | 866                             |
| GIN  | 2012 | country | 1_Afr   | Guinea  | 13948 | 31820 | 45768 | 0.033633  | 0.0767284 | 0.1103614 | 414712     | 702                           | 151                             | 853                             |
| GIN  | 2013 | country | 1_Afr   | Guinea  | 13873 | 31102 | 44975 | 0.0330181 | 0.0740244 | 0.1070425 | 420164     | 719                           | 230                             | 949                             |
| GIN  | 2014 | country | 1_Afr   | Guinea  | 13814 | 31770 | 45584 | 0.032435  | 0.0745963 | 0.1070313 | 425898     | 724                           | 160                             | 884                             |
| GIN  | 2015 | country | 1_Afr   | Guinea  | 13781 | 31672 | 45453 | 0.0319005 | 0.0733139 | 0.1052144 | 431999     | 733                           | 171                             | 904                             |
| GIN  | 2016 | country | 1_Afr   | Guinea  | 13787 | 31784 | 45571 | 0.0314425 | 0.0724853 | 0.1039277 | 438484     | 747                           | 189                             | 935                             |
| GIN  | 2017 | country | 1_Afr   | Guinea  | 13835 | 31582 | 45417 | 0.0310682 | 0.0709223 | 0.1019906 | 445311     | 765                           | 201                             | 966                             |
| GIN  | 2018 | country | 1_Afr   | Guinea  | 13911 | 30842 | 44753 | 0.0307489 | 0.0681742 | 0.0989231 | 452407     | 768                           | 220                             | 988                             |
| GIN  | 2019 | country | 1_Afr   | Guinea  | 13960 | 35318 | 49278 | 0.0303672 | 0.0768273 | 0.1071945 | 459707     | 784                           | 225                             | 1009                            |

| iso3 | year | level   | whoreg6 | whoname       | nnd  | pnd  | u5d   | nmr       | pnmr      | u5mr      | Livebirths | Neonatal birth defects deaths | 1-59 month birth defects deaths | Under five birth defects deaths |
|------|------|---------|---------|---------------|------|------|-------|-----------|-----------|-----------|------------|-------------------------------|---------------------------------|---------------------------------|
| GMB  | 2000 | country | 1_Afr   | Gambia        | 2121 | 4127 | 6248  | 0.0375961 | 0.073154  | 0.1107501 | 56415      | 102                           | 114                             | 216                             |
| GMB  | 2001 | country | 1_Afr   | Gambia        | 2147 | 3863 | 6010  | 0.0371611 | 0.0668708 | 0.104032  | 57775      | 105                           | 185                             | 290                             |
| GMB  | 2002 | country | 1_Afr   | Gambia        | 2181 | 3670 | 5851  | 0.0368323 | 0.0619729 | 0.0988051 | 59214      | 107                           | 136                             | 243                             |
| GMB  | 2003 | country | 1_Afr   | Gambia        | 2220 | 3541 | 5761  | 0.0365377 | 0.0582835 | 0.0948212 | 60759      | 111                           | 143                             | 254                             |
| GMB  | 2004 | country | 1_Afr   | Gambia        | 2260 | 3309 | 5569  | 0.0362194 | 0.0530386 | 0.089258  | 62397      | 114                           | 158                             | 272                             |
| GMB  | 2005 | country | 1_Afr   | Gambia        | 2296 | 3194 | 5490  | 0.0358175 | 0.0498199 | 0.0856374 | 64103      | 118                           | 159                             | 277                             |
| GMB  | 2006 | country | 1_Afr   | Gambia        | 2327 | 3089 | 5416  | 0.0353308 | 0.0469046 | 0.0822354 | 65863      | 122                           | 156                             | 278                             |
| GMB  | 2007 | country | 1_Afr   | Gambia        | 2352 | 2993 | 5345  | 0.0347314 | 0.0441942 | 0.0789256 | 67720      | 121                           | 156                             | 277                             |
| GMB  | 2008 | country | 1_Afr   | Gambia        | 2377 | 2875 | 5252  | 0.0341464 | 0.0412958 | 0.0754421 | 69612      | 124                           | 172                             | 297                             |
| GMB  | 2009 | country | 1_Afr   | Gambia        | 2396 | 2801 | 5197  | 0.033497  | 0.0391636 | 0.0726607 | 71529      | 130                           | 192                             | 323                             |
| GMB  | 2010 | country | 1_Afr   | Gambia        | 2414 | 2728 | 5142  | 0.0328554 | 0.0371258 | 0.0699812 | 73473      | 133                           | 192                             | 324                             |
| GMB  | 2011 | country | 1_Afr   | Gambia        | 2435 | 2650 | 5085  | 0.03229   | 0.0351422 | 0.0674322 | 75410      | 134                           | 191                             | 325                             |
| GMB  | 2012 | country | 1_Afr   | Gambia        | 2455 | 2540 | 4995  | 0.0317436 | 0.0328468 | 0.0645904 | 77338      | 140                           | 214                             | 354                             |
| GMB  | 2013 | country | 1_Afr   | Gambia        | 2469 | 2470 | 4939  | 0.0311457 | 0.0311637 | 0.0623094 | 79273      | 141                           | 218                             | 359                             |
| GMB  | 2014 | country | 1_Afr   | Gambia        | 2477 | 2399 | 4876  | 0.0305308 | 0.0295644 | 0.0600952 | 81131      | 141                           | 221                             | 362                             |
| GMB  | 2015 | country | 1_Afr   | Gambia        | 2479 | 2348 | 4827  | 0.0298872 | 0.0283116 | 0.0581988 | 82945      | 143                           | 224                             | 367                             |
| GMB  | 2016 | country | 1_Afr   | Gambia        | 2476 | 2286 | 4762  | 0.0292397 | 0.0269951 | 0.0562348 | 84679      | 145                           | 221                             | 367                             |
| GMB  | 2017 | country | 1_Afr   | Gambia        | 2464 | 2193 | 4657  | 0.0285411 | 0.0254076 | 0.0539487 | 86332      | 149                           | 187                             | 336                             |
| GMB  | 2018 | country | 1_Afr   | Gambia        | 2447 | 2135 | 4582  | 0.0278282 | 0.0242807 | 0.0521089 | 87932      | 147                           | 184                             | 331                             |
| GMB  | 2019 | country | 1_Afr   | Gambia        | 2427 | 2083 | 4510  | 0.0271302 | 0.0232892 | 0.0504194 | 89458      | 149                           | 181                             | 330                             |
| GNB  | 2000 | country | 1_Afr   | Guinea-Bissau | 2759 | 6030 | 8789  | 0.0547408 | 0.1196444 | 0.1743851 | 50401      | 87                            | 11                              | 98                              |
| GNB  | 2001 | country | 1_Afr   | Guinea-Bissau | 2747 | 5433 | 8180  | 0.0537447 | 0.1063011 | 0.1600457 | 51112      | 87                            | 16                              | 103                             |
| GNB  | 2002 | country | 1_Afr   | Guinea-Bissau | 2743 | 5651 | 8394  | 0.0528469 | 0.1088762 | 0.1617231 | 51905      | 90                            | 23                              | 112                             |
| GNB  | 2003 | country | 1_Afr   | Guinea-Bissau | 2744 | 8276 | 11020 | 0.0520158 | 0.1568771 | 0.208893  | 52753      | 91                            | 30                              | 121                             |
| GNB  | 2004 | country | 1_Afr   | Guinea-Bissau | 2747 | 6679 | 9426  | 0.0512058 | 0.124507  | 0.1757128 | 53646      | 96                            | 38                              | 134                             |
| GNB  | 2005 | country | 1_Afr   | Guinea-Bissau | 2745 | 4848 | 7593  | 0.050277  | 0.0888032 | 0.1390801 | 54598      | 96                            | 44                              | 140                             |
| GNB  | 2006 | country | 1_Afr   | Guinea-Bissau | 2741 | 4512 | 7253  | 0.0493253 | 0.0811934 | 0.1305188 | 55570      | 98                            | 46                              | 145                             |
| GNB  | 2007 | country | 1_Afr   | Guinea-Bissau | 2727 | 4247 | 6974  | 0.0481889 | 0.0750423 | 0.1232312 | 56590      | 103                           | 49                              | 152                             |
| GNB  | 2008 | country | 1_Afr   | Guinea-Bissau | 2705 | 4124 | 6829  | 0.0469401 | 0.0715691 | 0.1185093 | 57627      | 104                           | 50                              | 153                             |
| GNB  | 2009 | country | 1_Afr   | Guinea-Bissau | 2673 | 3982 | 6655  | 0.0455776 | 0.06789   | 0.1134677 | 58647      | 106                           | 50                              | 156                             |
| GNB  | 2010 | country | 1_Afr   | Guinea-Bissau | 2638 | 3817 | 6455  | 0.0442175 | 0.0639871 | 0.1082045 | 59660      | 107                           | 63                              | 170                             |
| GNB  | 2011 | country | 1_Afr   | Guinea-Bissau | 2603 | 3658 | 6261  | 0.0429326 | 0.0603279 | 0.1032605 | 60630      | 109                           | 78                              | 187                             |
| GNB  | 2012 | country | 1_Afr   | Guinea-Bissau | 2566 | 3520 | 6086  | 0.0416866 | 0.0571867 | 0.0988733 | 61555      | 109                           | 79                              | 188                             |
| GNB  | 2013 | country | 1_Afr   | Guinea-Bissau | 2532 | 3364 | 5896  | 0.0405665 | 0.0538954 | 0.0944619 | 62416      | 111                           | 86                              | 197                             |
| GNB  | 2014 | country | 1_Afr   | Guinea-Bissau | 2496 | 3265 | 5761  | 0.0394802 | 0.051638  | 0.0911182 | 63221      | 112                           | 97                              | 209                             |
| GNB  | 2015 | country | 1_Afr   | Guinea-Bissau | 2459 | 3541 | 6000  | 0.0384544 | 0.0553807 | 0.0938351 | 63946      | 114                           | 104                             | 219                             |
| GNB  | 2016 | country | 1_Afr   | Guinea-Bissau | 2425 | 3081 | 5506  | 0.0375194 | 0.0476619 | 0.0851813 | 64633      | 114                           | 120                             | 234                             |
| GNB  | 2017 | country | 1_Afr   | Guinea-Bissau | 2392 | 3003 | 5395  | 0.0366596 | 0.0460187 | 0.0826783 | 65249      | 116                           | 122                             | 237                             |
| GNB  | 2018 | country | 1_Afr   | Guinea-Bissau | 2358 | 2936 | 5294  | 0.0358205 | 0.0445991 | 0.0804196 | 65828      | 116                           | 115                             | 232                             |
| GNB  | 2019 | country | 1_Afr   | Guinea-Bissau | 2329 | 2884 | 5213  | 0.0350852 | 0.0434412 | 0.0785264 | 66381      | 115                           | 115                             | 230                             |

| iso3 | year | level   | whoreg6 | whoname           | nnd  | pnd  | u5d  | nmr       | pnmr      | u5mr      | Livebirths | Neonatal birth defects deaths | 1-59 month birth defects deaths | Under five birth defects deaths |
|------|------|---------|---------|-------------------|------|------|------|-----------|-----------|-----------|------------|-------------------------------|---------------------------------|---------------------------------|
| GNQ  | 2000 | country | 1_Afr   | Equatorial Guinea | 1111 | 2574 | 3685 | 0.0444228 | 0.1029046 | 0.1473274 | 25010      | 56                            | 7                               | 63                              |
| GNQ  | 2001 | country | 1_Afr   | Equatorial Guinea | 1136 | 2670 | 3806 | 0.0437469 | 0.1028024 | 0.1465493 | 25968      | 57                            | 8                               | 65                              |
| GNQ  | 2002 | country | 1_Afr   | Equatorial Guinea | 1161 | 2750 | 3911 | 0.0430529 | 0.1019922 | 0.1450452 | 26967      | 60                            | 8                               | 68                              |
| GNQ  | 2003 | country | 1_Afr   | Equatorial Guinea | 1180 | 2780 | 3960 | 0.0421687 | 0.0993638 | 0.1415326 | 27983      | 61                            | 9                               | 70                              |
| GNQ  | 2004 | country | 1_Afr   | Equatorial Guinea | 1198 | 2802 | 4000 | 0.0412834 | 0.0965407 | 0.1378241 | 29019      | 65                            | 10                              | 74                              |
| GNQ  | 2005 | country | 1_Afr   | Equatorial Guinea | 1211 | 2827 | 4038 | 0.0402283 | 0.0939018 | 0.1341301 | 30103      | 68                            | 10                              | 79                              |
| GNQ  | 2006 | country | 1_Afr   | Equatorial Guinea | 1218 | 2565 | 3783 | 0.0390511 | 0.0822332 | 0.1212843 | 31190      | 69                            | 12                              | 81                              |
| GNQ  | 2007 | country | 1_Afr   | Equatorial Guinea | 1225 | 2604 | 3829 | 0.0379156 | 0.0806096 | 0.1185252 | 32309      | 71                            | 13                              | 84                              |
| GNQ  | 2008 | country | 1_Afr   | Equatorial Guinea | 1230 | 2647 | 3877 | 0.0368306 | 0.0792504 | 0.116081  | 33396      | 74                            | 15                              | 90                              |
| GNQ  | 2009 | country | 1_Afr   | Equatorial Guinea | 1235 | 2680 | 3915 | 0.0358055 | 0.0777097 | 0.1135152 | 34492      | 76                            | 17                              | 93                              |
| GNQ  | 2010 | country | 1_Afr   | Equatorial Guinea | 1242 | 2426 | 3668 | 0.0349314 | 0.0682196 | 0.1031511 | 35555      | 78                            | 18                              | 96                              |
| GNQ  | 2011 | country | 1_Afr   | Equatorial Guinea | 1251 | 2448 | 3699 | 0.0341636 | 0.066854  | 0.1010176 | 36618      | 79                            | 18                              | 96                              |
| GNQ  | 2012 | country | 1_Afr   | Equatorial Guinea | 1261 | 2442 | 3703 | 0.0335117 | 0.0648979 | 0.0984096 | 37629      | 83                            | 12                              | 94                              |
| GNQ  | 2013 | country | 1_Afr   | Equatorial Guinea | 1268 | 2373 | 3641 | 0.0328134 | 0.0614079 | 0.0942214 | 38643      | 82                            | 14                              | 96                              |
| GNQ  | 2014 | country | 1_Afr   | Equatorial Guinea | 1277 | 2384 | 3661 | 0.0322113 | 0.0601352 | 0.0923465 | 39645      | 85                            | 15                              | 100                             |
| GNQ  | 2015 | country | 1_Afr   | Equatorial Guinea | 1283 | 2525 | 3808 | 0.0315923 | 0.0621839 | 0.0937762 | 40611      | 87                            | 11                              | 98                              |
| GNQ  | 2016 | country | 1_Afr   | Equatorial Guinea | 1286 | 2631 | 3917 | 0.0309335 | 0.063296  | 0.0942295 | 41573      | 87                            | 14                              | 101                             |
| GNQ  | 2017 | country | 1_Afr   | Equatorial Guinea | 1289 | 2263 | 3552 | 0.030293  | 0.0531765 | 0.0834695 | 42551      | 90                            | 15                              | 105                             |
| GNQ  | 2018 | country | 1_Afr   | Equatorial Guinea | 1288 | 2272 | 3560 | 0.0296164 | 0.0522431 | 0.0818594 | 43489      | 91                            | 16                              | 107                             |
| GNQ  | 2019 | country | 1_Afr   | Equatorial Guinea | 1289 | 2289 | 3578 | 0.0290052 | 0.0515121 | 0.0805173 | 44440      | 91                            | 16                              | 107                             |
| GRC  | 2000 | country | 4_Eur   | Greece            | 421  | 265  | 686  | 0.0039286 | 0.0024729 | 0.0064014 | 107164     | 117                           | 142                             | 260                             |
| GRC  | 2001 | country | 4_Eur   | Greece            | 386  | 255  | 641  | 0.0035845 | 0.002368  | 0.0059524 | 107687     | 123                           | 151                             | 273                             |
| GRC  | 2002 | country | 4_Eur   | Greece            | 354  | 247  | 601  | 0.0032648 | 0.002278  | 0.0055428 | 108430     | 99                            | 133                             | 232                             |
| GRC  | 2003 | country | 4_Eur   | Greece            | 325  | 240  | 565  | 0.002974  | 0.0021962 | 0.0051702 | 109280     | 80                            | 135                             | 214                             |
| GRC  | 2004 | country | 4_Eur   | Greece            | 300  | 234  | 534  | 0.0027203 | 0.0021218 | 0.0048421 | 110284     | 78                            | 127                             | 204                             |
| GRC  | 2005 | country | 4_Eur   | Greece            | 280  | 224  | 504  | 0.0025142 | 0.0020114 | 0.0045256 | 111367     | 77                            | 109                             | 186                             |
| GRC  | 2006 | country | 4_Eur   | Greece            | 262  | 217  | 479  | 0.0023475 | 0.0019443 | 0.0042918 | 111609     | 76                            | 115                             | 192                             |
| GRC  | 2007 | country | 4_Eur   | Greece            | 248  | 210  | 458  | 0.0022221 | 0.0018816 | 0.0041037 | 111606     | 72                            | 117                             | 189                             |
| GRC  | 2008 | country | 4_Eur   | Greece            | 237  | 206  | 443  | 0.0021446 | 0.0018641 | 0.0040088 | 110508     | 53                            | 109                             | 162                             |
| GRC  | 2009 | country | 4_Eur   | Greece            | 229  | 201  | 430  | 0.002111  | 0.0018529 | 0.0039638 | 108480     | 58                            | 115                             | 172                             |
| GRC  | 2010 | country | 4_Eur   | Greece            | 226  | 193  | 419  | 0.0021356 | 0.0018237 | 0.0039593 | 105827     | 70                            | 126                             | 196                             |
| GRC  | 2011 | country | 4_Eur   | Greece            | 226  | 185  | 411  | 0.0022026 | 0.001803  | 0.0040056 | 102607     | 79                            | 108                             | 187                             |
| GRC  | 2012 | country | 4_Eur   | Greece            | 229  | 178  | 407  | 0.0023125 | 0.0017975 | 0.00411   | 99027      | 75                            | 110                             | 185                             |
| GRC  | 2013 | country | 4_Eur   | Greece            | 235  | 173  | 408  | 0.0024614 | 0.001812  | 0.0042734 | 95474      | 80                            | 91                              | 172                             |
| GRC  | 2014 | country | 4_Eur   | Greece            | 239  | 170  | 409  | 0.0025911 | 0.0018431 | 0.0044342 | 92237      | 53                            | 51                              | 104                             |
| GRC  | 2015 | country | 4_Eur   | Greece            | 237  | 166  | 403  | 0.0026587 | 0.0018622 | 0.0045208 | 89143      | 58                            | 43                              | 101                             |
| GRC  | 2016 | country | 4_Eur   | Greece            | 228  | 160  | 388  | 0.0026424 | 0.0018543 | 0.0044968 | 86284      | 52                            | 51                              | 103                             |
| GRC  | 2017 | country | 4_Eur   | Greece            | 214  | 151  | 365  | 0.0025508 | 0.0017999 | 0.0043507 | 83895      | 49                            | 44                              | 94                              |
| GRC  | 2018 | country | 4_Eur   | Greece            | 196  | 138  | 334  | 0.0024094 | 0.0016964 | 0.0041057 | 81350      | 46                            | 41                              | 86                              |
| GRC  | 2019 | country | 4_Eur   | Greece            | 178  | 124  | 302  | 0.0022588 | 0.0015736 | 0.0038324 | 78802      | 41                            | 37                              | 77                              |

| iso3 | year | level   | whoreg6 | whoname   | nnd  | pnd   | u5d   | nmr       | pnmr      | u5mr      | Livebirths | Neonatal birth defects deaths | 1-59 month birth defects deaths | Under five birth defects deaths |
|------|------|---------|---------|-----------|------|-------|-------|-----------|-----------|-----------|------------|-------------------------------|---------------------------------|---------------------------------|
| GRD  | 2000 | country | 2_Amr   | Grenada   | 15   | 15    | 30    | 0.0080287 | 0.0080287 | 0.0160574 | 1868       | 1                             | 1                               | 2                               |
| GRD  | 2001 | country | 2_Amr   | Grenada   | 15   | 14    | 29    | 0.0080517 | 0.0075149 | 0.0155667 | 1863       | 0                             | 0                               | 0                               |
| GRD  | 2002 | country | 2_Amr   | Grenada   | 15   | 13    | 28    | 0.0080515 | 0.006978  | 0.0150295 | 1863       | 0                             | 2                               | 2                               |
| GRD  | 2003 | country | 2_Amr   | Grenada   | 15   | 12    | 27    | 0.008033  | 0.0064264 | 0.0144593 | 1867       | 2                             | 1                               | 3                               |
| GRD  | 2004 | country | 2_Amr   | Grenada   | 15   | 12    | 27    | 0.0080062 | 0.006405  | 0.0144112 | 1874       | 3                             | 5                               | 8                               |
| GRD  | 2005 | country | 2_Amr   | Grenada   | 15   | 12    | 27    | 0.0080012 | 0.006401  | 0.0144022 | 1875       | 0                             | 3                               | 3                               |
| GRD  | 2006 | country | 2_Amr   | Grenada   | 15   | 12    | 27    | 0.0080436 | 0.0064349 | 0.0144785 | 1865       | 3                             | 2                               | 5                               |
| GRD  | 2007 | country | 2_Amr   | Grenada   | 15   | 12    | 27    | 0.0081416 | 0.0065133 | 0.0146549 | 1842       | 2                             | 1                               | 3                               |
| GRD  | 2008 | country | 2_Amr   | Grenada   | 15   | 12    | 27    | 0.0083158 | 0.0066527 | 0.0149685 | 1804       | 3                             | 0                               | 3                               |
| GRD  | 2009 | country | 2_Amr   | Grenada   | 16   | 12    | 28    | 0.0085845 | 0.0064384 | 0.0150229 | 1864       | 6                             | 6                               | 12                              |
| GRD  | 2010 | country | 2_Amr   | Grenada   | 17   | 11    | 28    | 0.0089283 | 0.0057772 | 0.0147055 | 1904       | 2                             | 2                               | 4                               |
| GRD  | 2011 | country | 2_Amr   | Grenada   | 17   | 11    | 28    | 0.0093169 | 0.0060286 | 0.0153456 | 1825       | 3                             | 4                               | 7                               |
| GRD  | 2012 | country | 2_Amr   | Grenada   | 18   | 11    | 29    | 0.0097093 | 0.0059335 | 0.0156428 | 1854       | 2                             | 3                               | 5                               |
| GRD  | 2013 | country | 2_Amr   | Grenada   | 19   | 10    | 29    | 0.0100765 | 0.0053034 | 0.0153799 | 1886       | 0                             | 3                               | 3                               |
| GRD  | 2014 | country | 2_Amr   | Grenada   | 19   | 11    | 30    | 0.010401  | 0.0060216 | 0.0164226 | 1827       | 2                             | 2                               | 3                               |
| GRD  | 2015 | country | 2_Amr   | Grenada   | 20   | 10    | 30    | 0.010663  | 0.0053315 | 0.0159945 | 1876       | 3                             | 1                               | 4                               |
| GRD  | 2016 | country | 2_Amr   | Grenada   | 20   | 11    | 31    | 0.0108822 | 0.0059852 | 0.0168675 | 1838       | 4                             | 0                               | 4                               |
| GRD  | 2017 | country | 2_Amr   | Grenada   | 20   | 11    | 31    | 0.0110228 | 0.0060625 | 0.0170853 | 1814       | 2                             | 2                               | 4                               |
| GRD  | 2018 | country | 2_Amr   | Grenada   | 20   | 11    | 31    | 0.0110642 | 0.0060853 | 0.0171494 | 1808       | 3                             | 1                               | 4                               |
| GRD  | 2019 | country | 2_Amr   | Grenada   | 20   | 10    | 30    | 0.0110018 | 0.0055009 | 0.0165028 | 1818       | 3                             | 1                               | 4                               |
| GTM  | 2000 | country | 2_Amr   | Guatemala | 8745 | 12378 | 21123 | 0.0211759 | 0.0299731 | 0.0511489 | 412970     | 652                           | 1052                            | 1704                            |
| GTM  | 2001 | country | 2_Amr   | Guatemala | 8554 | 11886 | 20440 | 0.0206103 | 0.0286385 | 0.0492487 | 415036     | 644                           | 1165                            | 1809                            |
| GTM  | 2002 | country | 2_Amr   | Guatemala | 8342 | 11384 | 19726 | 0.0200596 | 0.0273746 | 0.0474342 | 415861     | 629                           | 1174                            | 1803                            |
| GTM  | 2003 | country | 2_Amr   | Guatemala | 8117 | 10883 | 19000 | 0.0195372 | 0.0261948 | 0.0457319 | 415465     | 652                           | 1212                            | 1864                            |
| GTM  | 2004 | country | 2_Amr   | Guatemala | 7874 | 10379 | 18253 | 0.0190207 | 0.0250718 | 0.0440925 | 413971     | 668                           | 1235                            | 1902                            |
| GTM  | 2005 | country | 2_Amr   | Guatemala | 7622 | 9864  | 17486 | 0.018513  | 0.0239586 | 0.0424716 | 411711     | 675                           | 1183                            | 1857                            |
| GTM  | 2006 | country | 2_Amr   | Guatemala | 7370 | 9359  | 16729 | 0.0180058 | 0.0228652 | 0.040871  | 409312     | 693                           | 1220                            | 1914                            |
| GTM  | 2007 | country | 2_Amr   | Guatemala | 7133 | 8849  | 15982 | 0.0175187 | 0.0217332 | 0.0392519 | 407165     | 711                           | 989                             | 1700                            |
| GTM  | 2008 | country | 2_Amr   | Guatemala | 6920 | 8355  | 15275 | 0.0170572 | 0.0205943 | 0.0376515 | 405695     | 722                           | 1173                            | 1895                            |
| GTM  | 2009 | country | 2_Amr   | Guatemala | 6737 | 7883  | 14620 | 0.0166249 | 0.0194528 | 0.0360777 | 405236     | 749                           | 1040                            | 1788                            |
| GTM  | 2010 | country | 2_Amr   | Guatemala | 6575 | 7430  | 14005 | 0.0162051 | 0.0183124 | 0.0345175 | 405737     | 769                           | 1029                            | 1797                            |
| GTM  | 2011 | country | 2_Amr   | Guatemala | 6424 | 7037  | 13461 | 0.0157746 | 0.0172799 | 0.0330545 | 407237     | 792                           | 841                             | 1633                            |
| GTM  | 2012 | country | 2_Amr   | Guatemala | 6284 | 6682  | 12966 | 0.0153523 | 0.0163247 | 0.031677  | 409319     | 807                           | 795                             | 1602                            |
| GTM  | 2013 | country | 2_Amr   | Guatemala | 6157 | 6336  | 12493 | 0.0149538 | 0.0153886 | 0.0303424 | 411734     | 827                           | 625                             | 1452                            |
| GTM  | 2014 | country | 2_Amr   | Guatemala | 6018 | 6054  | 12072 | 0.0145264 | 0.0146133 | 0.0291398 | 414279     | 850                           | 444                             | 1294                            |
| GTM  | 2015 | country | 2_Amr   | Guatemala | 5842 | 5839  | 11681 | 0.0140167 | 0.0140095 | 0.0280263 | 416787     | 857                           | 486                             | 1342                            |
| GTM  | 2016 | country | 2_Amr   | Guatemala | 5665 | 5652  | 11317 | 0.0135122 | 0.0134812 | 0.0269935 | 419250     | 870                           | 498                             | 1368                            |
| GTM  | 2017 | country | 2_Amr   | Guatemala | 5497 | 5473  | 10970 | 0.0130375 | 0.0129806 | 0.0260181 | 421629     | 882                           | 467                             | 1348                            |
| GTM  | 2018 | country | 2_Amr   | Guatemala | 5329 | 5335  | 10664 | 0.0125739 | 0.0125881 | 0.025162  | 423814     | 878                           | 446                             | 1325                            |
| GTM  | 2019 | country | 2_Amr   | Guatemala | 5180 | 5184  | 10364 | 0.0121663 | 0.0121757 | 0.024342  | 425767     | 882                           | 459                             | 1340                            |

| iso3 | year | level   | whoreg6 | whoname  | nnd  | pnd  | u5d  | nmr       | pnmr      | u5mr      | Livebirths | Neonatal birth defects deaths | 1-59 month birth defects deaths | Under five birth defects deaths |
|------|------|---------|---------|----------|------|------|------|-----------|-----------|-----------|------------|-------------------------------|---------------------------------|---------------------------------|
| GUY  | 2000 | country | 2_Amr   | Guyana   | 516  | 392  | 908  | 0.026736  | 0.0203111 | 0.0470471 | 19300      | 59                            | 40                              | 99                              |
| GUY  | 2001 | country | 2_Amr   | Guyana   | 493  | 373  | 866  | 0.0262038 | 0.0198256 | 0.0460293 | 18814      | 53                            | 33                              | 86                              |
| GUY  | 2002 | country | 2_Amr   | Guyana   | 471  | 353  | 824  | 0.0257439 | 0.0192942 | 0.0450381 | 18296      | 44                            | 40                              | 85                              |
| GUY  | 2003 | country | 2_Amr   | Guyana   | 451  | 333  | 784  | 0.0253195 | 0.0186949 | 0.0440144 | 17812      | 40                            | 54                              | 94                              |
| GUY  | 2004 | country | 2_Amr   | Guyana   | 432  | 315  | 747  | 0.0249016 | 0.0181574 | 0.043059  | 17348      | 36                            | 52                              | 87                              |
| GUY  | 2005 | country | 2_Amr   | Guyana   | 414  | 298  | 712  | 0.0244888 | 0.0176272 | 0.0421161 | 16906      | 40                            | 28                              | 68                              |
| GUY  | 2006 | country | 2_Amr   | Guyana   | 398  | 283  | 681  | 0.0240493 | 0.0171004 | 0.0411497 | 16549      | 51                            | 36                              | 87                              |
| GUY  | 2007 | country | 2_Amr   | Guyana   | 385  | 269  | 654  | 0.0236613 | 0.0165322 | 0.0401935 | 16271      | 31                            | 46                              | 77                              |
| GUY  | 2008 | country | 2_Amr   | Guyana   | 375  | 256  | 631  | 0.0232724 | 0.0158873 | 0.0391596 | 16114      | 37                            | 27                              | 64                              |
| GUY  | 2009 | country | 2_Amr   | Guyana   | 366  | 245  | 611  | 0.022894  | 0.0153252 | 0.0382192 | 15987      | 60                            | 25                              | 85                              |
| GUY  | 2010 | country | 2_Amr   | Guyana   | 358  | 237  | 595  | 0.0224978 | 0.0148938 | 0.0373916 | 15913      | 52                            | 28                              | 80                              |
| GUY  | 2011 | country | 2_Amr   | Guyana   | 352  | 228  | 580  | 0.0221597 | 0.0143534 | 0.0365131 | 15885      | 32                            | 24                              | 57                              |
| GUY  | 2012 | country | 2_Amr   | Guyana   | 345  | 221  | 566  | 0.0217205 | 0.0139137 | 0.0356342 | 15884      | 40                            | 24                              | 65                              |
| GUY  | 2013 | country | 2_Amr   | Guyana   | 339  | 215  | 554  | 0.021312  | 0.0135165 | 0.0348285 | 15907      | 41                            | 32                              | 73                              |
| GUY  | 2014 | country | 2_Amr   | Guyana   | 332  | 207  | 539  | 0.0209219 | 0.0130447 | 0.0339666 | 15869      | 47                            | 37                              | 84                              |
| GUY  | 2015 | country | 2_Amr   | Guyana   | 324  | 199  | 523  | 0.0204987 | 0.0125902 | 0.0330889 | 15806      | 41                            | 31                              | 72                              |
| GUY  | 2016 | country | 2_Amr   | Guyana   | 315  | 191  | 506  | 0.0200377 | 0.0121498 | 0.0321875 | 15720      | 41                            | 30                              | 71                              |
| GUY  | 2017 | country | 2_Amr   | Guyana   | 306  | 183  | 489  | 0.0195761 | 0.0117073 | 0.0312833 | 15631      | 40                            | 28                              | 68                              |
| GUY  | 2018 | country | 2_Amr   | Guyana   | 297  | 174  | 471  | 0.0190889 | 0.0111834 | 0.0302723 | 15559      | 38                            | 26                              | 65                              |
| GUY  | 2019 | country | 2_Amr   | Guyana   | 287  | 166  | 453  | 0.0186002 | 0.0107583 | 0.0293585 | 15430      | 37                            | 25                              | 63                              |
| HND  | 2000 | country | 2_Amr   | Honduras | 3857 | 4288 | 8145 | 0.0173536 | 0.0192928 | 0.0366465 | 222259     | 413                           | 716                             | 1129                            |
| HND  | 2001 | country | 2_Amr   | Honduras | 3773 | 4020 | 7793 | 0.0169847 | 0.0180966 | 0.0350813 | 222141     | 413                           | 715                             | 1128                            |
| HND  | 2002 | country | 2_Amr   | Honduras | 3678 | 3749 | 7427 | 0.0166066 | 0.0169271 | 0.0335337 | 221479     | 419                           | 609                             | 1029                            |
| HND  | 2003 | country | 2_Amr   | Honduras | 3579 | 3487 | 7066 | 0.0162351 | 0.0158177 | 0.0320528 | 220449     | 417                           | 496                             | 913                             |
| HND  | 2004 | country | 2_Amr   | Honduras | 3475 | 3236 | 6711 | 0.0158546 | 0.0147641 | 0.0306187 | 219180     | 422                           | 399                             | 820                             |
| HND  | 2005 | country | 2_Amr   | Honduras | 3374 | 2992 | 6366 | 0.015496  | 0.0137416 | 0.0292376 | 217733     | 420                           | 355                             | 775                             |
| HND  | 2006 | country | 2_Amr   | Honduras | 3231 | 2806 | 6037 | 0.0149528 | 0.0129859 | 0.0279387 | 216080     | 419                           | 298                             | 718                             |
| HND  | 2007 | country | 2_Amr   | Honduras | 3085 | 2639 | 5724 | 0.0144045 | 0.0123221 | 0.0267266 | 214169     | 425                           | 254                             | 679                             |
| HND  | 2008 | country | 2_Amr   | Honduras | 2942 | 2482 | 5424 | 0.0138742 | 0.0117049 | 0.0255791 | 212049     | 427                           | 218                             | 645                             |
| HND  | 2009 | country | 2_Amr   | Honduras | 2794 | 2347 | 5141 | 0.013306  | 0.0111773 | 0.0244833 | 209980     | 423                           | 202                             | 625                             |
| HND  | 2010 | country | 2_Amr   | Honduras | 2654 | 2223 | 4877 | 0.0127615 | 0.0106891 | 0.0234506 | 207969     | 418                           | 204                             | 621                             |
| HND  | 2011 | country | 2_Amr   | Honduras | 2525 | 2113 | 4638 | 0.0122379 | 0.0102411 | 0.0224791 | 206325     | 415                           | 206                             | 620                             |
| HND  | 2012 | country | 2_Amr   | Honduras | 2411 | 2016 | 4427 | 0.0117525 | 0.0098271 | 0.0215796 | 205147     | 407                           | 208                             | 615                             |
| HND  | 2013 | country | 2_Amr   | Honduras | 2318 | 1924 | 4242 | 0.011334  | 0.0094075 | 0.0207415 | 204517     | 412                           | 209                             | 621                             |
| HND  | 2014 | country | 2_Amr   | Honduras | 2232 | 1850 | 4082 | 0.0109204 | 0.0090514 | 0.0199719 | 204388     | 409                           | 212                             | 621                             |
| HND  | 2015 | country | 2_Amr   | Honduras | 2153 | 1781 | 3934 | 0.0105173 | 0.0087001 | 0.0192173 | 204711     | 406                           | 214                             | 620                             |
| HND  | 2016 | country | 2_Amr   | Honduras | 2080 | 1728 | 3808 | 0.0101229 | 0.0084098 | 0.0185327 | 205475     | 408                           | 217                             | 625                             |
| HND  | 2017 | country | 2_Amr   | Honduras | 2021 | 1663 | 3684 | 0.0097918 | 0.0080573 | 0.0178491 | 206397     | 396                           | 218                             | 614                             |
| HND  | 2018 | country | 2_Amr   | Honduras | 1965 | 1619 | 3584 | 0.0094769 | 0.0078082 | 0.0172852 | 207345     | 389                           | 221                             | 611                             |
| HND  | 2019 | country | 2_Amr   | Honduras | 1907 | 1573 | 3480 | 0.009164  | 0.007559  | 0.016723  | 208097     | 387                           | 224                             | 611                             |

| iso3 | year | level   | whoreg6 | whoname | nnd  | pnd   | u5d   | nmr       | pnmr      | u5mr      | Livebirths | Neonatal birth defects deaths | 1-59 month birth defects deaths | Under five birth defects deaths |
|------|------|---------|---------|---------|------|-------|-------|-----------|-----------|-----------|------------|-------------------------------|---------------------------------|---------------------------------|
| HRV  | 2000 | country | 4_Eur   | Croatia | 251  | 131   | 382   | 0.0055579 | 0.0029008 | 0.0084587 | 45161      | 73                            | 42                              | 115                             |
| HRV  | 2001 | country | 4_Eur   | Croatia | 233  | 126   | 359   | 0.0053016 | 0.0028669 | 0.0081685 | 43949      | 70                            | 53                              | 123                             |
| HRV  | 2002 | country | 4_Eur   | Croatia | 215  | 121   | 336   | 0.0050156 | 0.0028227 | 0.0078383 | 42867      | 58                            | 46                              | 104                             |
| HRV  | 2003 | country | 4_Eur   | Croatia | 200  | 116   | 316   | 0.0047304 | 0.0027436 | 0.007474  | 42280      | 52                            | 40                              | 92                              |
| HRV  | 2004 | country | 4_Eur   | Croatia | 189  | 110   | 299   | 0.0044901 | 0.0026133 | 0.0071033 | 42093      | 53                            | 41                              | 94                              |
| HRV  | 2005 | country | 4_Eur   | Croatia | 179  | 106   | 285   | 0.0042309 | 0.0025054 | 0.0067363 | 42308      | 64                            | 44                              | 108                             |
| HRV  | 2006 | country | 4_Eur   | Croatia | 171  | 102   | 273   | 0.0040071 | 0.0023902 | 0.0063972 | 42675      | 57                            | 44                              | 101                             |
| HRV  | 2007 | country | 4_Eur   | Croatia | 167  | 96    | 263   | 0.0038827 | 0.0022319 | 0.0061146 | 43012      | 52                            | 30                              | 82                              |
| HRV  | 2008 | country | 4_Eur   | Croatia | 163  | 90    | 253   | 0.0037744 | 0.002084  | 0.0058585 | 43185      | 48                            | 27                              | 75                              |
| HRV  | 2009 | country | 4_Eur   | Croatia | 159  | 85    | 244   | 0.0036765 | 0.0019654 | 0.005642  | 43247      | 60                            | 30                              | 90                              |
| HRV  | 2010 | country | 4_Eur   | Croatia | 152  | 82    | 234   | 0.0035483 | 0.0019142 | 0.0054625 | 42838      | 39                            | 33                              | 72                              |
| HRV  | 2011 | country | 4_Eur   | Croatia | 143  | 82    | 225   | 0.0033795 | 0.0019379 | 0.0053175 | 42313      | 37                            | 23                              | 60                              |
| HRV  | 2012 | country | 4_Eur   | Croatia | 136  | 80    | 216   | 0.0032747 | 0.0019263 | 0.0052011 | 41530      | 36                            | 27                              | 64                              |
| HRV  | 2013 | country | 4_Eur   | Croatia | 132  | 77    | 209   | 0.0032313 | 0.0018849 | 0.0051162 | 40851      | 29                            | 26                              | 55                              |
| HRV  | 2014 | country | 4_Eur   | Croatia | 128  | 74    | 202   | 0.0032016 | 0.0018509 | 0.0050525 | 39980      | 38                            | 30                              | 68                              |
| HRV  | 2015 | country | 4_Eur   | Croatia | 122  | 74    | 196   | 0.0031147 | 0.0018892 | 0.0050039 | 39169      | 37                            | 32                              | 69                              |
| HRV  | 2016 | country | 4_Eur   | Croatia | 116  | 75    | 191   | 0.0030197 | 0.0019524 | 0.0049721 | 38414      | 46                            | 28                              | 74                              |
| HRV  | 2017 | country | 4_Eur   | Croatia | 111  | 75    | 186   | 0.0029371 | 0.0019846 | 0.0049217 | 37792      | 37                            | 30                              | 67                              |
| HRV  | 2018 | country | 4_Eur   | Croatia | 108  | 73    | 181   | 0.0029429 | 0.0019892 | 0.0049321 | 36698      | 37                            | 30                              | 67                              |
| HRV  | 2019 | country | 4_Eur   | Croatia | 105  | 71    | 176   | 0.0029187 | 0.0019736 | 0.0048924 | 35974      | 37                            | 29                              | 66                              |
| HTI  | 2000 | country | 2_Amr   | Haiti   | 8000 | 19498 | 27498 | 0.0297401 | 0.0724841 | 0.1022243 | 268997     | 438                           | 288                             | 727                             |
| HTI  | 2001 | country | 2_Amr   | Haiti   | 7930 | 18753 | 26683 | 0.0293973 | 0.0695191 | 0.0989164 | 269753     | 436                           | 296                             | 732                             |
| HTI  | 2002 | country | 2_Amr   | Haiti   | 7908 | 18026 | 25934 | 0.0292351 | 0.0666404 | 0.0958755 | 270497     | 451                           | 308                             | 759                             |
| HTI  | 2003 | country | 2_Amr   | Haiti   | 7943 | 17316 | 25259 | 0.0292853 | 0.0638428 | 0.0931281 | 271229     | 449                           | 320                             | 769                             |
| HTI  | 2004 | country | 2_Amr   | Haiti   | 7996 | 16656 | 24652 | 0.0293994 | 0.0612403 | 0.0906397 | 271978     | 464                           | 323                             | 787                             |
| HTI  | 2005 | country | 2_Amr   | Haiti   | 8023 | 16086 | 24109 | 0.0294248 | 0.0589963 | 0.0884211 | 272661     | 462                           | 332                             | 795                             |
| HTI  | 2006 | country | 2_Amr   | Haiti   | 8035 | 15567 | 23602 | 0.0293997 | 0.056959  | 0.0863587 | 273302     | 477                           | 343                             | 820                             |
| HTI  | 2007 | country | 2_Amr   | Haiti   | 8013 | 15093 | 23106 | 0.0292548 | 0.0551033 | 0.0843582 | 273904     | 485                           | 356                             | 841                             |
| HTI  | 2008 | country | 2_Amr   | Haiti   | 7978 | 14651 | 22629 | 0.0290727 | 0.0533899 | 0.0824627 | 274415     | 487                           | 375                             | 862                             |
| HTI  | 2009 | country | 2_Amr   | Haiti   | 7928 | 14232 | 22160 | 0.0288456 | 0.0517824 | 0.0806281 | 274842     | 489                           | 387                             | 876                             |
| HTI  | 2010 | country | 2_Amr   | Haiti   | 8474 | 50293 | 58767 | 0.0308031 | 0.1828155 | 0.2136185 | 275103     | 499                           | 395                             | 894                             |
| HTI  | 2011 | country | 2_Amr   | Haiti   | 7819 | 13166 | 20985 | 0.0284141 | 0.047845  | 0.0762591 | 275180     | 507                           | 412                             | 919                             |
| HTI  | 2012 | country | 2_Amr   | Haiti   | 7747 | 12856 | 20603 | 0.0281665 | 0.0467418 | 0.0749084 | 275043     | 512                           | 432                             | 944                             |
| HTI  | 2013 | country | 2_Amr   | Haiti   | 7659 | 12483 | 20142 | 0.0278822 | 0.0454437 | 0.0733258 | 274692     | 523                           | 467                             | 990                             |
| HTI  | 2014 | country | 2_Amr   | Haiti   | 7558 | 12109 | 19667 | 0.0275687 | 0.0441691 | 0.0717378 | 274151     | 517                           | 489                             | 1006                            |
| HTI  | 2015 | country | 2_Amr   | Haiti   | 7420 | 11756 | 19176 | 0.0271344 | 0.0429909 | 0.0701253 | 273453     | 531                           | 497                             | 1028                            |
| HTI  | 2016 | country | 2_Amr   | Haiti   | 7278 | 11306 | 18584 | 0.0266951 | 0.0414694 | 0.0681645 | 272634     | 529                           | 489                             | 1018                            |
| HTI  | 2017 | country | 2_Amr   | Haiti   | 7139 | 10880 | 18019 | 0.0262704 | 0.0400367 | 0.0663072 | 271750     | 524                           | 481                             | 1006                            |
| HTI  | 2018 | country | 2_Amr   | Haiti   | 6987 | 10457 | 17444 | 0.0258019 | 0.038616  | 0.0644179 | 270795     | 520                           | 476                             | 995                             |
| HTI  | 2019 | country | 2_Amr   | Haiti   | 6827 | 10063 | 16890 | 0.0252971 | 0.0372879 | 0.0625849 | 269873     | 499                           | 467                             | 966                             |

| iso3 | year | level   | whoreg6 | whoname   | nnd    | pnd    | u5d    | nmr       | pnmr      | u5mr      | Livebirths | Neonatal birth defects deaths | 1-59 month birth defects deaths | Under five birth defects deaths |
|------|------|---------|---------|-----------|--------|--------|--------|-----------|-----------|-----------|------------|-------------------------------|---------------------------------|---------------------------------|
| HUN  | 2000 | country | 4_Eur   | Hungary   | 552    | 438    | 990    | 0.0057511 | 0.0045634 | 0.0103144 | 95982      | 108                           | 129                             | 237                             |
| HUN  | 2001 | country | 4_Eur   | Hungary   | 519    | 398    | 917    | 0.0054473 | 0.0041773 | 0.0096246 | 95276      | 110                           | 123                             | 233                             |
| HUN  | 2002 | country | 4_Eur   | Hungary   | 486    | 368    | 854    | 0.0051149 | 0.003873  | 0.008988  | 95016      | 95                            | 106                             | 201                             |
| HUN  | 2003 | country | 4_Eur   | Hungary   | 451    | 348    | 799    | 0.0047514 | 0.0036663 | 0.0084177 | 94919      | 86                            | 98                              | 185                             |
| HUN  | 2004 | country | 4_Eur   | Hungary   | 419    | 335    | 754    | 0.0044019 | 0.0035194 | 0.0079213 | 95187      | 72                            | 84                              | 156                             |
| HUN  | 2005 | country | 4_Eur   | Hungary   | 395    | 323    | 718    | 0.0041491 | 0.0033928 | 0.007542  | 95201      | 92                            | 95                              | 187                             |
| HUN  | 2006 | country | 4_Eur   | Hungary   | 375    | 310    | 685    | 0.0039436 | 0.0032601 | 0.0072037 | 95090      | 102                           | 90                              | 192                             |
| HUN  | 2007 | country | 4_Eur   | Hungary   | 358    | 293    | 651    | 0.0037716 | 0.0030868 | 0.0068585 | 94919      | 86                            | 86                              | 171                             |
| HUN  | 2008 | country | 4_Eur   | Hungary   | 342    | 273    | 615    | 0.0036328 | 0.0028999 | 0.0065327 | 94141      | 72                            | 80                              | 152                             |
| HUN  | 2009 | country | 4_Eur   | Hungary   | 326    | 256    | 582    | 0.0034959 | 0.0027453 | 0.0062412 | 93252      | 73                            | 93                              | 166                             |
| HUN  | 2010 | country | 4_Eur   | Hungary   | 311    | 246    | 557    | 0.0033701 | 0.0026658 | 0.0060359 | 92281      | 75                            | 86                              | 161                             |
| HUN  | 2011 | country | 4_Eur   | Hungary   | 298    | 241    | 539    | 0.0032626 | 0.0026386 | 0.0059012 | 91337      | 78                            | 75                              | 152                             |
| HUN  | 2012 | country | 4_Eur   | Hungary   | 286    | 239    | 525    | 0.003155  | 0.0026365 | 0.0057915 | 90650      | 66                            | 63                              | 128                             |
| HUN  | 2013 | country | 4_Eur   | Hungary   | 275    | 235    | 510    | 0.0030478 | 0.0026045 | 0.0056523 | 90229      | 56                            | 64                              | 121                             |
| HUN  | 2014 | country | 4_Eur   | Hungary   | 262    | 228    | 490    | 0.0029044 | 0.0025275 | 0.0054319 | 90208      | 65                            | 73                              | 137                             |
| HUN  | 2015 | country | 4_Eur   | Hungary   | 248    | 216    | 464    | 0.0027342 | 0.0023814 | 0.0051156 | 90702      | 63                            | 61                              | 124                             |
| HUN  | 2016 | country | 4_Eur   | Hungary   | 231    | 200    | 431    | 0.0025308 | 0.0021912 | 0.004722  | 91275      | 60                            | 70                              | 130                             |
| HUN  | 2017 | country | 4_Eur   | Hungary   | 214    | 183    | 397    | 0.0023407 | 0.0020016 | 0.0043423 | 91426      | 56                            | 58                              | 114                             |
| HUN  | 2018 | country | 4_Eur   | Hungary   | 198    | 167    | 365    | 0.0021592 | 0.0018211 | 0.0039804 | 91700      | 51                            | 53                              | 104                             |
| HUN  | 2019 | country | 4_Eur   | Hungary   | 182    | 153    | 335    | 0.0019873 | 0.0016707 | 0.003658  | 91580      | 47                            | 48                              | 96                              |
| IDN  | 2000 | country | 3_Sear  | Indonesia | 104919 | 134113 | 239032 | 0.0227603 | 0.0290934 | 0.0518538 | 4609728    | 8976                          | 9823                            | 18799                           |
| IDN  | 2001 | country | 3_Sear  | Indonesia | 102905 | 127820 | 230725 | 0.0219818 | 0.027304  | 0.0492858 | 4681380    | 9070                          | 6841                            | 15911                           |
| IDN  | 2002 | country | 3_Sear  | Indonesia | 101347 | 119466 | 220813 | 0.0213147 | 0.0251254 | 0.0464401 | 4754788    | 9180                          | 6266                            | 15445                           |
| IDN  | 2003 | country | 3_Sear  | Indonesia | 100019 | 115839 | 215858 | 0.0207407 | 0.0240211 | 0.0447618 | 4822361    | 9291                          | 6585                            | 15876                           |
| IDN  | 2004 | country | 3_Sear  | Indonesia | 99189  | 142964 | 242153 | 0.0203265 | 0.0292972 | 0.0496237 | 4879792    | 9388                          | 6864                            | 16252                           |
| IDN  | 2005 | country | 3_Sear  | Indonesia | 97328  | 115883 | 213211 | 0.0197613 | 0.0235286 | 0.0432899 | 4925191    | 9597                          | 6924                            | 16521                           |
| IDN  | 2006 | country | 3_Sear  | Indonesia | 95731  | 114951 | 210682 | 0.0193032 | 0.0231788 | 0.042482  | 4959330    | 9914                          | 7126                            | 17041                           |
| IDN  | 2007 | country | 3_Sear  | Indonesia | 94031  | 96402  | 190433 | 0.0188596 | 0.0193352 | 0.0381947 | 4985848    | 10238                         | 6503                            | 16741                           |
| IDN  | 2008 | country | 3_Sear  | Indonesia | 92091  | 87527  | 179618 | 0.0183915 | 0.0174801 | 0.0358716 | 5007251    | 10490                         | 6341                            | 16831                           |
| IDN  | 2009 | country | 3_Sear  | Indonesia | 89913  | 88247  | 178160 | 0.0178985 | 0.0175669 | 0.0354655 | 5023488    | 10738                         | 5897                            | 16635                           |
| IDN  | 2010 | country | 3_Sear  | Indonesia | 87474  | 84262  | 171736 | 0.0173798 | 0.0167416 | 0.0341213 | 5033089    | 10872                         | 6386                            | 17258                           |
| IDN  | 2011 | country | 3_Sear  | Indonesia | 84801  | 83156  | 167958 | 0.0168449 | 0.0165183 | 0.0333632 | 5034214    | 10943                         | 6751                            | 17694                           |
| IDN  | 2012 | country | 3_Sear  | Indonesia | 81867  | 76174  | 158041 | 0.01629   | 0.0151572 | 0.0314471 | 5025612    | 11063                         | 7156                            | 18219                           |
| IDN  | 2013 | country | 3_Sear  | Indonesia | 78781  | 72146  | 150927 | 0.0157332 | 0.0144081 | 0.0301413 | 5007307    | 11110                         | 7372                            | 18483                           |
| IDN  | 2014 | country | 3_Sear  | Indonesia | 75553  | 70545  | 146098 | 0.0151696 | 0.0141641 | 0.0293338 | 4980545    | 11029                         | 7470                            | 18499                           |
| IDN  | 2015 | country | 3_Sear  | Indonesia | 71869  | 69160  | 141029 | 0.0145273 | 0.0139796 | 0.0285069 | 4947183    | 10973                         | 8062                            | 19035                           |
| IDN  | 2016 | country | 3_Sear  | Indonesia | 68412  | 63583  | 131995 | 0.0139336 | 0.0129502 | 0.0268838 | 4909852    | 10894                         | 8539                            | 19432                           |
| IDN  | 2017 | country | 3_Sear  | Indonesia | 65254  | 61089  | 126343 | 0.0133951 | 0.0125402 | 0.0259353 | 4871493    | 10807                         | 8927                            | 19734                           |
| IDN  | 2018 | country | 3_Sear  | Indonesia | 62270  | 57984  | 120254 | 0.0128799 | 0.0119934 | 0.0248733 | 4834669    | 10669                         | 9314                            | 19983                           |
| IDN  | 2019 | country | 3_Sear  | Indonesia | 59591  | 53439  | 113030 | 0.0124125 | 0.011131  | 0.0235434 | 4800899    | 10486                         | 9281                            | 19767                           |

| iso3 | year | level   | whoreg6 | whoname | nnd     | pnd     | u5d     | nmr       | pnmr      | u5mr      | Livebirths | Neonatal birth defects deaths | 1-59 month birth defects deaths | Under five birth defects deaths |
|------|------|---------|---------|---------|---------|---------|---------|-----------|-----------|-----------|------------|-------------------------------|---------------------------------|---------------------------------|
| IND  | 2000 | country | 3_Sear  | India   | 1254908 | 1278727 | 2533635 | 0.0449919 | 0.0458459 | 0.0908378 | 27900000   | 64158                         | 18888                           | 83046                           |
| IND  | 2001 | country | 3_Sear  | India   | 1215240 | 1239343 | 2454583 | 0.0435763 | 0.0444406 | 0.0880169 | 27900000   | 64830                         | 19458                           | 84288                           |
| IND  | 2002 | country | 3_Sear  | India   | 1174949 | 1170130 | 2345079 | 0.0421605 | 0.0419876 | 0.0841481 | 27900000   | 64763                         | 29512                           | 94275                           |
| IND  | 2003 | country | 3_Sear  | India   | 1134823 | 1121733 | 2256556 | 0.040778  | 0.0403076 | 0.0810856 | 27800000   | 64893                         | 29648                           | 94541                           |
| IND  | 2004 | country | 3_Sear  | India   | 1094376 | 1079289 | 2173665 | 0.0394202 | 0.0388767 | 0.0782969 | 27800000   | 63993                         | 29747                           | 93740                           |
| IND  | 2005 | country | 3_Sear  | India   | 1053741 | 985351  | 2039092 | 0.0381151 | 0.0356414 | 0.0737565 | 27600000   | 63813                         | 29804                           | 93617                           |
| IND  | 2006 | country | 3_Sear  | India   | 1012132 | 958440  | 1970572 | 0.0368587 | 0.0349034 | 0.0717622 | 27500000   | 65035                         | 31867                           | 96902                           |
| IND  | 2007 | country | 3_Sear  | India   | 969440  | 880713  | 1850153 | 0.0356479 | 0.0323853 | 0.0680332 | 27200000   | 62824                         | 23086                           | 85910                           |
| IND  | 2008 | country | 3_Sear  | India   | 924724  | 824228  | 1748952 | 0.0344325 | 0.0306905 | 0.0651229 | 26900000   | 62317                         | 34232                           | 96549                           |
| IND  | 2009 | country | 3_Sear  | India   | 878704  | 779098  | 1657802 | 0.033212  | 0.0294472 | 0.0626592 | 26500000   | 60932                         | 34390                           | 95322                           |
| IND  | 2010 | country | 3_Sear  | India   | 832286  | 697448  | 1529734 | 0.0319796 | 0.0267986 | 0.0587782 | 26000000   | 59798                         | 23776                           | 83574                           |
| IND  | 2011 | country | 3_Sear  | India   | 786477  | 640122  | 1426599 | 0.030728  | 0.0250098 | 0.0557378 | 25600000   | 59995                         | 24440                           | 84435                           |
| IND  | 2012 | country | 3_Sear  | India   | 743101  | 570262  | 1313363 | 0.0294898 | 0.0226307 | 0.0521205 | 25200000   | 56583                         | 25319                           | 81902                           |
| IND  | 2013 | country | 3_Sear  | India   | 702601  | 513266  | 1215867 | 0.0282596 | 0.0206443 | 0.0489038 | 24900000   | 55402                         | 23760                           | 79163                           |
| IND  | 2014 | country | 3_Sear  | India   | 665584  | 483051  | 1148635 | 0.0270574 | 0.019637  | 0.0466944 | 24600000   | 54684                         | 22120                           | 76804                           |
| IND  | 2015 | country | 3_Sear  | India   | 631542  | 442808  | 1074349 | 0.0258703 | 0.0181391 | 0.0440094 | 24400000   | 52626                         | 20831                           | 73457                           |
| IND  | 2016 | country | 3_Sear  | India   | 600955  | 398363  | 999318  | 0.0247384 | 0.0163987 | 0.041137  | 24300000   | 50577                         | 19826                           | 70402                           |
| IND  | 2017 | country | 3_Sear  | India   | 572765  | 362873  | 935638  | 0.0236524 | 0.0149849 | 0.0386373 | 24200000   | 49199                         | 19034                           | 68233                           |
| IND  | 2018 | country | 3_Sear  | India   | 546427  | 333134  | 879561  | 0.0226178 | 0.0137892 | 0.036407  | 24200000   | 49003                         | 18409                           | 67412                           |
| IND  | 2019 | country | 3_Sear  | India   | 522249  | 297763  | 820012  | 0.0216603 | 0.0123498 | 0.0340101 | 24100000   | 46915                         | 17278                           | 64193                           |
| IRL  | 2000 | country | 4_Eur   | Ireland | 222     | 165     | 387     | 0.0040023 | 0.0029747 | 0.006977  | 55468      | 111                           | 51                              | 162                             |
| IRL  | 2001 | country | 4_Eur   | Ireland | 224     | 160     | 384     | 0.0039196 | 0.0027997 | 0.0067192 | 57149      | 112                           | 53                              | 165                             |
| IRL  | 2002 | country | 4_Eur   | Ireland | 222     | 152     | 374     | 0.0037397 | 0.0025605 | 0.0063001 | 59364      | 111                           | 50                              | 160                             |
| IRL  | 2003 | country | 4_Eur   | Ireland | 216     | 144     | 360     | 0.0035176 | 0.0023451 | 0.0058627 | 61405      | 107                           | 53                              | 160                             |
| IRL  | 2004 | country | 4_Eur   | Ireland | 207     | 139     | 346     | 0.0032433 | 0.0021779 | 0.0054211 | 63824      | 105                           | 39                              | 144                             |
| IRL  | 2005 | country | 4_Eur   | Ireland | 197     | 135     | 332     | 0.0029939 | 0.0020517 | 0.0050455 | 65801      | 97                            | 44                              | 141                             |
| IRL  | 2006 | country | 4_Eur   | Ireland | 187     | 134     | 321     | 0.0027524 | 0.0019723 | 0.0047248 | 67940      | 91                            | 50                              | 141                             |
| IRL  | 2007 | country | 4_Eur   | Ireland | 180     | 134     | 314     | 0.0025901 | 0.0019282 | 0.0045183 | 69495      | 98                            | 46                              | 144                             |
| IRL  | 2008 | country | 4_Eur   | Ireland | 177     | 132     | 309     | 0.0025    | 0.0018644 | 0.0043643 | 70801      | 77                            | 59                              | 136                             |
| IRL  | 2009 | country | 4_Eur   | Ireland | 177     | 127     | 304     | 0.002461  | 0.0017658 | 0.0042267 | 71923      | 85                            | 45                              | 130                             |
| IRL  | 2010 | country | 4_Eur   | Ireland | 179     | 119     | 298     | 0.0024816 | 0.0016498 | 0.0041313 | 72132      | 80                            | 44                              | 124                             |
| IRL  | 2011 | country | 4_Eur   | Ireland | 181     | 111     | 292     | 0.0025251 | 0.0015486 | 0.0040737 | 71679      | 86                            | 52                              | 138                             |
| IRL  | 2012 | country | 4_Eur   | Ireland | 179     | 105     | 284     | 0.0025111 | 0.001473  | 0.0039842 | 71282      | 76                            | 39                              | 116                             |
| IRL  | 2013 | country | 4_Eur   | Ireland | 176     | 99      | 275     | 0.0025169 | 0.0014158 | 0.0039327 | 69927      | 78                            | 43                              | 121                             |
| IRL  | 2014 | country | 4_Eur   | Ireland | 169     | 96      | 265     | 0.0024538 | 0.0013939 | 0.0038477 | 68873      | 73                            | 45                              | 118                             |
| IRL  | 2015 | country | 4_Eur   | Ireland | 161     | 92      | 253     | 0.0024012 | 0.0013721 | 0.0037734 | 67049      | 70                            | 39                              | 109                             |
| IRL  | 2016 | country | 4_Eur   | Ireland | 152     | 89      | 241     | 0.0023252 | 0.0013615 | 0.0036867 | 65369      | 67                            | 38                              | 104                             |
| IRL  | 2017 | country | 4_Eur   | Ireland | 144     | 84      | 228     | 0.0022556 | 0.0013157 | 0.0035713 | 63842      | 63                            | 36                              | 98                              |
| IRL  | 2018 | country | 4_Eur   | Ireland | 135     | 80      | 215     | 0.0021762 | 0.0012896 | 0.0034659 | 62033      | 59                            | 34                              | 93                              |
| IRL  | 2019 | country | 4_Eur   | Ireland | 128     | 75      | 203     | 0.0021035 | 0.0012325 | 0.0033361 | 60850      | 56                            | 32                              | 88                              |

| iso3 | year | level   | whoreg6 | whoname            | nnd   | pnd   | u5d   | nmr       | pnmr      | u5mr      | Livebirths | Neonatal birth defects deaths | 1-59 month birth defects deaths | Under five birth defects deaths |
|------|------|---------|---------|--------------------|-------|-------|-------|-----------|-----------|-----------|------------|-------------------------------|---------------------------------|---------------------------------|
| IRN  | 2000 | country | 5_Emr   | Iran (Islamic Repu | 21810 | 18582 | 40392 | 0.0187674 | 0.0159897 | 0.0347571 | 1162121    | 2592                          | 4708                            | 7299                            |
| IRN  | 2001 | country | 5_Emr   | Iran (Islamic Repu | 21129 | 16590 | 37719 | 0.0182296 | 0.0143135 | 0.0325431 | 1159047    | 2649                          | 4068                            | 6717                            |
| IRN  | 2002 | country | 5_Emr   | Iran (Islamic Repu | 20559 | 14980 | 35539 | 0.0176527 | 0.0128624 | 0.030515  | 1164639    | 2744                          | 3877                            | 6621                            |
| IRN  | 2003 | country | 5_Emr   | Iran (Islamic Repu | 20061 | 13683 | 33744 | 0.0170497 | 0.0116291 | 0.0286788 | 1176618    | 2847                          | 3623                            | 6470                            |
| IRN  | 2004 | country | 5_Emr   | Iran (Islamic Repu | 19467 | 12746 | 32213 | 0.0163142 | 0.0106817 | 0.0269958 | 1193259    | 2933                          | 3460                            | 6393                            |
| IRN  | 2005 | country | 5_Emr   | Iran (Islamic Repu | 18915 | 11980 | 30895 | 0.0155904 | 0.0098743 | 0.0254647 | 1213247    | 2990                          | 3312                            | 6302                            |
| IRN  | 2006 | country | 5_Emr   | Iran (Islamic Repu | 18399 | 11310 | 29709 | 0.0148919 | 0.0091541 | 0.024046  | 1235506    | 3158                          | 3334                            | 6492                            |
| IRN  | 2007 | country | 5_Emr   | Iran (Islamic Repu | 17867 | 10715 | 28582 | 0.0141824 | 0.0085053 | 0.0226876 | 1259805    | 3271                          | 3258                            | 6529                            |
| IRN  | 2008 | country | 5_Emr   | Iran (Islamic Repu | 17379 | 10177 | 27556 | 0.0135177 | 0.0079159 | 0.0214336 | 1285646    | 3359                          | 3184                            | 6543                            |
| IRN  | 2009 | country | 5_Emr   | Iran (Islamic Repu | 16881 | 9777  | 26658 | 0.0128637 | 0.0074503 | 0.020314  | 1312296    | 3457                          | 3137                            | 6594                            |
| IRN  | 2010 | country | 5_Emr   | Iran (Islamic Repu | 16408 | 9496  | 25904 | 0.012244  | 0.0070861 | 0.0193301 | 1340083    | 3585                          | 3114                            | 6699                            |
| IRN  | 2011 | country | 5_Emr   | Iran (Islamic Repu | 16025 | 9246  | 25271 | 0.0116965 | 0.0067485 | 0.018445  | 1370073    | 3656                          | 3091                            | 6747                            |
| IRN  | 2012 | country | 5_Emr   | Iran (Islamic Repu | 15700 | 9079  | 24779 | 0.0111942 | 0.0064734 | 0.0176677 | 1402506    | 3719                          | 3087                            | 6806                            |
| IRN  | 2013 | country | 5_Emr   | Iran (Islamic Repu | 15421 | 8960  | 24381 | 0.0107354 | 0.0062376 | 0.016973  | 1436458    | 3851                          | 3094                            | 6945                            |
| IRN  | 2014 | country | 5_Emr   | Iran (Islamic Repu | 15186 | 8827  | 24013 | 0.0103302 | 0.0060045 | 0.0163348 | 1470054    | 3906                          | 3094                            | 6999                            |
| IRN  | 2015 | country | 5_Emr   | Iran (Islamic Repu | 14942 | 8697  | 23639 | 0.0099615 | 0.0057981 | 0.0157596 | 1499977    | 3862                          | 3125                            | 6987                            |
| IRN  | 2016 | country | 5_Emr   | Iran (Islamic Repu | 14601 | 8604  | 23205 | 0.0095919 | 0.0056523 | 0.0152442 | 1522221    | 3771                          | 3135                            | 6906                            |
| IRN  | 2017 | country | 5_Emr   | Iran (Islamic Repu | 14166 | 8499  | 22665 | 0.0092314 | 0.0055384 | 0.0147698 | 1534551    | 3783                          | 3137                            | 6920                            |
| IRN  | 2018 | country | 5_Emr   | Iran (Islamic Repu | 13633 | 8405  | 22038 | 0.0088793 | 0.0054742 | 0.0143535 | 1535372    | 3659                          | 3139                            | 6798                            |
| IRN  | 2019 | country | 5_Emr   | Iran (Islamic Repu | 13075 | 8173  | 21248 | 0.0085758 | 0.0053606 | 0.0139365 | 1524633    | 3510                          | 3088                            | 6598                            |
| IRQ  | 2000 | country | 5_Emr   | Iraq               | 19821 | 16456 | 36277 | 0.02357   | 0.0195689 | 0.0431389 | 840942     | 1801                          | 1826                            | 3627                            |
| IRQ  | 2001 | country | 5_Emr   | Iraq               | 19924 | 16371 | 36295 | 0.0232694 | 0.0191202 | 0.0423895 | 856233     | 1850                          | 1693                            | 3544                            |
| IRQ  | 2002 | country | 5_Emr   | Iraq               | 19979 | 16499 | 36478 | 0.0229598 | 0.0189609 | 0.0419207 | 870173     | 1910                          | 1529                            | 3439                            |
| IRQ  | 2003 | country | 5_Emr   | Iraq               | 19994 | 15842 | 35836 | 0.0226346 | 0.0179337 | 0.0405682 | 883340     | 1889                          | 1401                            | 3291                            |
| IRQ  | 2004 | country | 5_Emr   | Iraq               | 19955 | 16088 | 36043 | 0.0222677 | 0.0179524 | 0.0402201 | 896141     | 1927                          | 1286                            | 3213                            |
| IRQ  | 2005 | country | 5_Emr   | Iraq               | 19912 | 15405 | 35317 | 0.0218872 | 0.0169336 | 0.0388208 | 909755     | 1928                          | 1284                            | 3212                            |
| IRQ  | 2006 | country | 5_Emr   | Iraq               | 19879 | 15209 | 35088 | 0.021478  | 0.0164321 | 0.0379101 | 925554     | 1927                          | 1096                            | 3022                            |
| IRQ  | 2007 | country | 5_Emr   | Iraq               | 19882 | 14981 | 34863 | 0.0210599 | 0.015868  | 0.036928  | 944068     | 1937                          | 1142                            | 3079                            |
| IRQ  | 2008 | country | 5_Emr   | Iraq               | 19900 | 14731 | 34631 | 0.0206152 | 0.0152608 | 0.035876  | 965307     | 1987                          | 1480                            | 3467                            |
| IRQ  | 2009 | country | 5_Emr   | Iraq               | 19938 | 15052 | 34990 | 0.0201636 | 0.0152223 | 0.035386  | 988811     | 2044                          | 1638                            | 3681                            |
| IRQ  | 2010 | country | 5_Emr   | Iraq               | 19950 | 14265 | 34215 | 0.0196914 | 0.01408   | 0.0337714 | 1013131    | 2096                          | 1461                            | 3557                            |
| IRQ  | 2011 | country | 5_Emr   | Iraq               | 19936 | 14006 | 33942 | 0.0192387 | 0.0135163 | 0.032755  | 1036246    | 2212                          | 1735                            | 3947                            |
| IRQ  | 2012 | country | 5_Emr   | Iraq               | 19850 | 13809 | 33659 | 0.0187906 | 0.0130724 | 0.031863  | 1056379    | 2306                          | 1746                            | 4053                            |
| IRQ  | 2013 | country | 5_Emr   | Iraq               | 19676 | 13470 | 33146 | 0.0183441 | 0.0125582 | 0.0309022 | 1072608    | 2409                          | 1879                            | 4288                            |
| IRQ  | 2014 | country | 5_Emr   | Iraq               | 19401 | 13131 | 32532 | 0.0178858 | 0.0121054 | 0.0299913 | 1084713    | 2497                          | 1965                            | 4462                            |
| IRQ  | 2015 | country | 5_Emr   | Iraq               | 19064 | 12789 | 31853 | 0.0174363 | 0.0116973 | 0.0291335 | 1093354    | 2583                          | 2163                            | 4747                            |
| IRQ  | 2016 | country | 5_Emr   | Iraq               | 18587 | 12492 | 31079 | 0.0168979 | 0.0113565 | 0.0282545 | 1099957    | 2681                          | 2418                            | 5099                            |
| IRQ  | 2017 | country | 5_Emr   | Iraq               | 18070 | 12250 | 30320 | 0.0163324 | 0.0110716 | 0.027404  | 1106391    | 2752                          | 2613                            | 5365                            |
| IRQ  | 2018 | country | 5_Emr   | Iraq               | 17625 | 11934 | 29559 | 0.015819  | 0.010711  | 0.0265299 | 1114168    | 2799                          | 2692                            | 5491                            |
| IRQ  | 2019 | country | 5_Emr   | Iraq               | 17203 | 11632 | 28835 | 0.0153065 | 0.0103499 | 0.0256564 | 1123900    | 2839                          | 2688                            | 5528                            |

| iso3 | year | level   | whoreg6 | whoname | nnd | pnd | u5d | nmr       | pnmr      | u5mr      | Livebirths | Neonatal birth defects deaths | 1-59 month birth defects deaths | Under five birth defects deaths |
|------|------|---------|---------|---------|-----|-----|-----|-----------|-----------|-----------|------------|-------------------------------|---------------------------------|---------------------------------|
| ISL  | 2000 | country | 4_Eur   | Iceland | 9   | 8   | 17  | 0.0020959 | 0.001863  | 0.0039589 | 4294       | 1                             | 4                               | 5                               |
| ISL  | 2001 | country | 4_Eur   | Iceland | 8   | 8   | 16  | 0.0019754 | 0.0019754 | 0.0039508 | 4050       | 0                             | 1                               | 1                               |
| ISL  | 2002 | country | 4_Eur   | Iceland | 8   | 7   | 15  | 0.0018627 | 0.0016299 | 0.0034926 | 4295       | 5                             | 1                               | 6                               |
| ISL  | 2003 | country | 4_Eur   | Iceland | 7   | 7   | 14  | 0.0017608 | 0.0017608 | 0.0035215 | 3976       | 2                             | 0                               | 2                               |
| ISL  | 2004 | country | 4_Eur   | Iceland | 7   | 7   | 14  | 0.0016689 | 0.0016689 | 0.0033377 | 4194       | 4                             | 0                               | 4                               |
| ISL  | 2005 | country | 4_Eur   | Iceland | 7   | 7   | 14  | 0.0015885 | 0.0015885 | 0.0031771 | 4407       | 2                             | 1                               | 3                               |
| ISL  | 2006 | country | 4_Eur   | Iceland | 7   | 6   | 13  | 0.0015185 | 0.0013015 | 0.00282   | 4610       | 2                             | 0                               | 2                               |
| ISL  | 2007 | country | 4_Eur   | Iceland | 7   | 6   | 13  | 0.0014586 | 0.0012502 | 0.0027089 | 4799       | 1                             | 1                               | 3                               |
| ISL  | 2008 | country | 4_Eur   | Iceland | 6   | 7   | 13  | 0.001406  | 0.0016403 | 0.0030462 | 4268       | 1                             | 0                               | 1                               |
| ISL  | 2009 | country | 4_Eur   | Iceland | 6   | 6   | 12  | 0.001359  | 0.001359  | 0.002718  | 4415       | 0                             | 2                               | 2                               |
| ISL  | 2010 | country | 4_Eur   | Iceland | 6   | 6   | 12  | 0.0013143 | 0.0013143 | 0.0026285 | 4565       | 2                             | 1                               | 3                               |
| ISL  | 2011 | country | 4_Eur   | Iceland | 6   | 6   | 12  | 0.0012727 | 0.0012727 | 0.0025453 | 4715       | 0                             | 0                               | 0                               |
| ISL  | 2012 | country | 4_Eur   | Iceland | 6   | 5   | 11  | 0.0012339 | 0.0010282 | 0.0022621 | 4863       | 0                             | 1                               | 1                               |
| ISL  | 2013 | country | 4_Eur   | Iceland | 5   | 6   | 11  | 0.0011962 | 0.0014355 | 0.0026317 | 4180       | 2                             | 0                               | 2                               |
| ISL  | 2014 | country | 4_Eur   | Iceland | 5   | 5   | 10  | 0.0011614 | 0.0011614 | 0.0023229 | 4305       | 2                             | 2                               | 3                               |
| ISL  | 2015 | country | 4_Eur   | Iceland | 5   | 5   | 10  | 0.0011271 | 0.0011271 | 0.0022542 | 4436       | 1                             | 1                               | 2                               |
| ISL  | 2016 | country | 4_Eur   | Iceland | 5   | 4   | 9   | 0.0010937 | 0.0008749 | 0.0019686 | 4572       | 1                             | 1                               | 2                               |
| ISL  | 2017 | country | 4_Eur   | Iceland | 4   | 5   | 9   | 0.0010619 | 0.0013274 | 0.0023893 | 3767       | 1                             | 0                               | 1                               |
| ISL  | 2018 | country | 4_Eur   | Iceland | 4   | 4   | 8   | 0.0010275 | 0.0010275 | 0.002055  | 3893       | 1                             | 1                               | 2                               |
| ISL  | 2019 | country | 4_Eur   | Iceland | 4   | 4   | 8   | 0.0009952 | 0.0009952 | 0.0019904 | 4019       | 1                             | 1                               | 2                               |
| ISR  | 2000 | country | 4_Eur   | Israel  | 452 | 397 | 849 | 0.0035885 | 0.0031519 | 0.0067404 | 125958     | 138                           | 85                              | 223                             |
| ISR  | 2001 | country | 4_Eur   | Israel  | 445 | 390 | 835 | 0.0034652 | 0.0030369 | 0.0065022 | 128419     | 154                           | 100                             | 254                             |
| ISR  | 2002 | country | 4_Eur   | Israel  | 436 | 384 | 820 | 0.0033292 | 0.0029322 | 0.0062614 | 130960     | 129                           | 97                              | 225                             |
| ISR  | 2003 | country | 4_Eur   | Israel  | 421 | 381 | 802 | 0.0031556 | 0.0028558 | 0.0060113 | 133415     | 132                           | 100                             | 232                             |
| ISR  | 2004 | country | 4_Eur   | Israel  | 400 | 381 | 781 | 0.0029377 | 0.0027981 | 0.0057358 | 136163     | 154                           | 101                             | 255                             |
| ISR  | 2005 | country | 4_Eur   | Israel  | 380 | 380 | 760 | 0.0027306 | 0.0027306 | 0.0054611 | 139165     | 138                           | 142                             | 280                             |
| ISR  | 2006 | country | 4_Eur   | Israel  | 368 | 373 | 741 | 0.0025895 | 0.0026247 | 0.0052142 | 142113     | 122                           | 111                             | 234                             |
| ISR  | 2007 | country | 4_Eur   | Israel  | 363 | 363 | 726 | 0.0024948 | 0.0024948 | 0.0049896 | 145504     | 135                           | 125                             | 261                             |
| ISR  | 2008 | country | 4_Eur   | Israel  | 364 | 350 | 714 | 0.0024386 | 0.0023448 | 0.0047834 | 149265     | 132                           | 115                             | 247                             |
| ISR  | 2009 | country | 4_Eur   | Israel  | 369 | 335 | 704 | 0.0024158 | 0.0021932 | 0.0046091 | 152742     | 128                           | 135                             | 262                             |
| ISR  | 2010 | country | 4_Eur   | Israel  | 373 | 323 | 696 | 0.0023906 | 0.0020702 | 0.0044608 | 156026     | 123                           | 113                             | 236                             |
| ISR  | 2011 | country | 4_Eur   | Israel  | 373 | 314 | 687 | 0.0023421 | 0.0019716 | 0.0043137 | 159260     | 131                           | 112                             | 243                             |
| ISR  | 2012 | country | 4_Eur   | Israel  | 369 | 308 | 677 | 0.0022744 | 0.0018984 | 0.0041728 | 162240     | 136                           | 120                             | 256                             |
| ISR  | 2013 | country | 4_Eur   | Israel  | 363 | 305 | 668 | 0.0022036 | 0.0018515 | 0.0040551 | 164731     | 134                           | 100                             | 234                             |
| ISR  | 2014 | country | 4_Eur   | Israel  | 357 | 303 | 660 | 0.0021399 | 0.0018162 | 0.0039562 | 166828     | 132                           | 116                             | 248                             |
| ISR  | 2015 | country | 4_Eur   | Israel  | 351 | 301 | 652 | 0.0020851 | 0.0017881 | 0.0038733 | 168333     | 126                           | 123                             | 249                             |
| ISR  | 2016 | country | 4_Eur   | Israel  | 345 | 300 | 645 | 0.0020378 | 0.001772  | 0.0038097 | 169303     | 117                           | 116                             | 233                             |
| ISR  | 2017 | country | 4_Eur   | Israel  | 339 | 300 | 639 | 0.0019973 | 0.0017676 | 0.0037649 | 169725     | 121                           | 118                             | 239                             |
| ISR  | 2018 | country | 4_Eur   | Israel  | 334 | 298 | 632 | 0.0019642 | 0.0017524 | 0.0037166 | 170048     | 117                           | 117                             | 235                             |
| ISR  | 2019 | country | 4_Eur   | Israel  | 329 | 295 | 624 | 0.0019351 | 0.0017351 | 0.0036702 | 170019     | 115                           | 116                             | 231                             |

| iso3 | year | level   | whoreg6 | whoname | nnd  | pnd  | u5d  | nmr       | pnmr      | u5mr      | Livebirths | Neonatal birth defects deaths | 1-59 month birth defects deaths | Under five birth defects deaths |
|------|------|---------|---------|---------|------|------|------|-----------|-----------|-----------|------------|-------------------------------|---------------------------------|---------------------------------|
| ITA  | 2000 | country | 4_Eur   | Italy   | 1847 | 1117 | 2964 | 0.0034584 | 0.0020915 | 0.0055499 | 534067     | 530                           | 460                             | 990                             |
| ITA  | 2001 | country | 4_Eur   | Italy   | 1756 | 1081 | 2837 | 0.0032571 | 0.0020051 | 0.0052622 | 539133     | 506                           | 418                             | 924                             |
| ITA  | 2002 | country | 4_Eur   | Italy   | 1683 | 1046 | 2729 | 0.0030857 | 0.0019178 | 0.0050035 | 545414     | 466                           | 400                             | 866                             |
| ITA  | 2003 | country | 4_Eur   | Italy   | 1623 | 1016 | 2639 | 0.0029398 | 0.0018403 | 0.0047801 | 552086     | 456                           | 372                             | 829                             |
| ITA  | 2004 | country | 4_Eur   | Italy   | 1574 | 989  | 2563 | 0.0028172 | 0.0017701 | 0.0045873 | 558719     | 388                           | 329                             | 717                             |
| ITA  | 2005 | country | 4_Eur   | Italy   | 1530 | 970  | 2500 | 0.0027128 | 0.0017199 | 0.0044327 | 563994     | 420                           | 331                             | 751                             |
| ITA  | 2006 | country | 4_Eur   | Italy   | 1490 | 957  | 2447 | 0.0026249 | 0.001686  | 0.0043109 | 567630     | 411                           | 339                             | 750                             |
| ITA  | 2007 | country | 4_Eur   | Italy   | 1452 | 949  | 2401 | 0.0025507 | 0.0016671 | 0.0042178 | 569260     | 350                           | 312                             | 662                             |
| ITA  | 2008 | country | 4_Eur   | Italy   | 1416 | 937  | 2353 | 0.0024916 | 0.0016488 | 0.0041404 | 568305     | 380                           | 301                             | 682                             |
| ITA  | 2009 | country | 4_Eur   | Italy   | 1381 | 915  | 2296 | 0.0024471 | 0.0016214 | 0.0040684 | 564343     | 324                           | 268                             | 592                             |
| ITA  | 2010 | country | 4_Eur   | Italy   | 1342 | 884  | 2226 | 0.0024069 | 0.0015855 | 0.0039924 | 557555     | 306                           | 263                             | 569                             |
| ITA  | 2011 | country | 4_Eur   | Italy   | 1294 | 851  | 2145 | 0.00236   | 0.0015521 | 0.003912  | 548306     | 351                           | 262                             | 613                             |
| ITA  | 2012 | country | 4_Eur   | Italy   | 1234 | 818  | 2052 | 0.0022984 | 0.0015236 | 0.003822  | 536895     | 291                           | 247                             | 538                             |
| ITA  | 2013 | country | 4_Eur   | Italy   | 1170 | 784  | 1954 | 0.002233  | 0.0014963 | 0.0037292 | 523967     | 259                           | 261                             | 520                             |
| ITA  | 2014 | country | 4_Eur   | Italy   | 1111 | 744  | 1855 | 0.0021778 | 0.0014584 | 0.0036362 | 510149     | 274                           | 227                             | 501                             |
| ITA  | 2015 | country | 4_Eur   | Italy   | 1055 | 702  | 1757 | 0.0021273 | 0.0014155 | 0.0035428 | 495934     | 250                           | 234                             | 484                             |
| ITA  | 2016 | country | 4_Eur   | Italy   | 1002 | 664  | 1666 | 0.0020771 | 0.0013765 | 0.0034536 | 482400     | 235                           | 215                             | 451                             |
| ITA  | 2017 | country | 4_Eur   | Italy   | 951  | 633  | 1584 | 0.0020249 | 0.0013478 | 0.0033726 | 469664     | 228                           | 205                             | 433                             |
| ITA  | 2018 | country | 4_Eur   | Italy   | 903  | 603  | 1506 | 0.0019747 | 0.0013186 | 0.0032933 | 457292     | 214                           | 196                             | 410                             |
| ITA  | 2019 | country | 4_Eur   | Italy   | 858  | 574  | 1432 | 0.0019186 | 0.0012835 | 0.0032021 | 447207     | 203                           | 186                             | 390                             |
| JAM  | 2000 | country | 2_Amr   | Jamaica | 946  | 312  | 1258 | 0.0167047 | 0.0055094 | 0.022214  | 56631      | 121                           | 34                              | 155                             |
| JAM  | 2001 | country | 2_Amr   | Jamaica | 905  | 300  | 1205 | 0.0162692 | 0.0053931 | 0.0216624 | 55626      | 116                           | 35                              | 151                             |
| JAM  | 2002 | country | 2_Amr   | Jamaica | 865  | 291  | 1156 | 0.0158225 | 0.0053229 | 0.0211454 | 54669      | 110                           | 38                              | 148                             |
| JAM  | 2003 | country | 2_Amr   | Jamaica | 826  | 288  | 1114 | 0.0153517 | 0.0053526 | 0.0207043 | 53805      | 106                           | 43                              | 149                             |
| JAM  | 2004 | country | 2_Amr   | Jamaica | 792  | 287  | 1079 | 0.0149273 | 0.0054093 | 0.0203366 | 53057      | 102                           | 48                              | 150                             |
| JAM  | 2005 | country | 2_Amr   | Jamaica | 764  | 286  | 1050 | 0.014562  | 0.0054512 | 0.0200132 | 52465      | 95                            | 43                              | 138                             |
| JAM  | 2006 | country | 2_Amr   | Jamaica | 740  | 284  | 1024 | 0.0142469 | 0.0054677 | 0.0197147 | 51941      | 98                            | 80                              | 178                             |
| JAM  | 2007 | country | 2_Amr   | Jamaica | 719  | 280  | 999  | 0.0139882 | 0.0054474 | 0.0194356 | 51401      | 93                            | 67                              | 159                             |
| JAM  | 2008 | country | 2_Amr   | Jamaica | 698  | 274  | 972  | 0.0136984 | 0.0053773 | 0.0190757 | 50955      | 91                            | 75                              | 166                             |
| JAM  | 2009 | country | 2_Amr   | Jamaica | 676  | 265  | 941  | 0.0134107 | 0.0052571 | 0.0186678 | 50408      | 84                            | 64                              | 148                             |
| JAM  | 2010 | country | 2_Amr   | Jamaica | 652  | 258  | 910  | 0.0130569 | 0.0051667 | 0.0182236 | 49935      | 89                            | 70                              | 159                             |
| JAM  | 2011 | country | 2_Amr   | Jamaica | 627  | 251  | 878  | 0.0126885 | 0.0050795 | 0.017768  | 49415      | 86                            | 81                              | 167                             |
| JAM  | 2012 | country | 2_Amr   | Jamaica | 604  | 242  | 846  | 0.0123299 | 0.0049401 | 0.01727   | 48987      | 64                            | 74                              | 138                             |
| JAM  | 2013 | country | 2_Amr   | Jamaica | 582  | 232  | 814  | 0.0119532 | 0.0047649 | 0.0167181 | 48690      | 68                            | 67                              | 136                             |
| JAM  | 2014 | country | 2_Amr   | Jamaica | 561  | 223  | 784  | 0.0116034 | 0.0046124 | 0.0162158 | 48348      | 68                            | 63                              | 131                             |
| JAM  | 2015 | country | 2_Amr   | Jamaica | 539  | 214  | 753  | 0.0112109 | 0.0044511 | 0.015662  | 48078      | 62                            | 61                              | 123                             |
| JAM  | 2016 | country | 2_Amr   | Jamaica | 520  | 208  | 728  | 0.0108776 | 0.0043511 | 0.0152287 | 47805      | 61                            | 60                              | 121                             |
| JAM  | 2017 | country | 2_Amr   | Jamaica | 500  | 202  | 702  | 0.0105081 | 0.0042453 | 0.0147533 | 47583      | 59                            | 61                              | 120                             |
| JAM  | 2018 | country | 2_Amr   | Jamaica | 481  | 196  | 677  | 0.0101774 | 0.0041471 | 0.0143245 | 47262      | 56                            | 57                              | 114                             |
| JAM  | 2019 | country | 2_Amr   | Jamaica | 461  | 191  | 652  | 0.0098393 | 0.0040766 | 0.0139159 | 46853      | 54                            | 56                              | 110                             |

| iso3 | year | level   | whoreg6 | whoname | nnd  | pnd  | u5d  | nmr       | pnmr      | u5mr      | Livebirths | Neonatal birth defects deaths | 1-59 month birth defects deaths | Under five birth defects deaths |
|------|------|---------|---------|---------|------|------|------|-----------|-----------|-----------|------------|-------------------------------|---------------------------------|---------------------------------|
| JOR  | 2000 | country | 5_Emr   | Jordan  | 2622 | 1672 | 4294 | 0.0161187 | 0.0102816 | 0.0264003 | 162669     | 481                           | 457                             | 938                             |
| JOR  | 2001 | country | 5_Emr   | Jordan  | 2598 | 1647 | 4245 | 0.0157193 | 0.0099636 | 0.0256829 | 165275     | 482                           | 478                             | 960                             |
| JOR  | 2002 | country | 5_Emr   | Jordan  | 2572 | 1628 | 4200 | 0.0152853 | 0.0096724 | 0.0249577 | 168267     | 483                           | 490                             | 973                             |
| JOR  | 2003 | country | 5_Emr   | Jordan  | 2551 | 1614 | 4165 | 0.0148444 | 0.0093929 | 0.0242373 | 171849     | 485                           | 500                             | 984                             |
| JOR  | 2004 | country | 5_Emr   | Jordan  | 2532 | 1606 | 4138 | 0.0143931 | 0.0091276 | 0.0235206 | 175918     | 490                           | 504                             | 994                             |
| JOR  | 2005 | country | 5_Emr   | Jordan  | 2517 | 1604 | 4121 | 0.0139284 | 0.0088763 | 0.0228047 | 180710     | 492                           | 510                             | 1003                            |
| JOR  | 2006 | country | 5_Emr   | Jordan  | 2511 | 1605 | 4116 | 0.0134861 | 0.0086199 | 0.022106  | 186192     | 500                           | 518                             | 1017                            |
| JOR  | 2007 | country | 5_Emr   | Jordan  | 2510 | 1611 | 4121 | 0.0130662 | 0.0083842 | 0.0214504 | 192098     | 502                           | 525                             | 1027                            |
| JOR  | 2008 | country | 5_Emr   | Jordan  | 2514 | 1618 | 4132 | 0.0126764 | 0.0081569 | 0.0208333 | 198321     | 514                           | 533                             | 1047                            |
| JOR  | 2009 | country | 5_Emr   | Jordan  | 2518 | 1623 | 4141 | 0.0123164 | 0.0079385 | 0.0202549 | 204443     | 519                           | 540                             | 1059                            |
| JOR  | 2010 | country | 5_Emr   | Jordan  | 2513 | 1633 | 4146 | 0.0119655 | 0.0077743 | 0.0197393 | 210029     | 523                           | 547                             | 1070                            |
| JOR  | 2011 | country | 5_Emr   | Jordan  | 2496 | 1639 | 4135 | 0.0116336 | 0.0076387 | 0.0192724 | 214551     | 515                           | 554                             | 1069                            |
| JOR  | 2012 | country | 5_Emr   | Jordan  | 2464 | 1637 | 4101 | 0.0113062 | 0.0075119 | 0.018818  | 217934     | 511                           | 557                             | 1069                            |
| JOR  | 2013 | country | 5_Emr   | Jordan  | 2415 | 1635 | 4050 | 0.0109817 | 0.0074343 | 0.018416  | 219911     | 506                           | 559                             | 1065                            |
| JOR  | 2014 | country | 5_Emr   | Jordan  | 2353 | 1611 | 3964 | 0.010669  | 0.0073046 | 0.0179736 | 220546     | 491                           | 558                             | 1049                            |
| JOR  | 2015 | country | 5_Emr   | Jordan  | 2279 | 1584 | 3863 | 0.010356  | 0.0071978 | 0.0175538 | 220067     | 481                           | 553                             | 1034                            |
| JOR  | 2016 | country | 5_Emr   | Jordan  | 2197 | 1544 | 3741 | 0.0100403 | 0.0070561 | 0.0170965 | 218817     | 480                           | 543                             | 1023                            |
| JOR  | 2017 | country | 5_Emr   | Jordan  | 2120 | 1490 | 3610 | 0.0097571 | 0.0068566 | 0.0166137 | 217278     | 461                           | 528                             | 989                             |
| JOR  | 2018 | country | 5_Emr   | Jordan  | 2045 | 1436 | 3481 | 0.0094718 | 0.0066491 | 0.016121  | 215903     | 448                           | 513                             | 960                             |
| JOR  | 2019 | country | 5_Emr   | Jordan  | 1974 | 1384 | 3358 | 0.0091915 | 0.006443  | 0.0156345 | 214763     | 432                           | 497                             | 929                             |
| JPN  | 2000 | country | 6_Wpr   | Japan   | 2061 | 3234 | 5295 | 0.0017676 | 0.0027736 | 0.0045413 | 1165976    | 975                           | 1135                            | 2111                            |
| JPN  | 2001 | country | 6_Wpr   | Japan   | 1987 | 3030 | 5017 | 0.0017199 | 0.0026227 | 0.0043425 | 1155315    | 936                           | 1102                            | 2038                            |
| JPN  | 2002 | country | 6_Wpr   | Japan   | 1903 | 2872 | 4775 | 0.0016611 | 0.002507  | 0.0041681 | 1145613    | 1003                          | 1014                            | 2017                            |
| JPN  | 2003 | country | 6_Wpr   | Japan   | 1804 | 2767 | 4571 | 0.0015862 | 0.002433  | 0.0040192 | 1137281    | 837                           | 979                             | 1816                            |
| JPN  | 2004 | country | 6_Wpr   | Japan   | 1700 | 2695 | 4395 | 0.0015038 | 0.002384  | 0.0038878 | 1130447    | 834                           | 970                             | 1804                            |
| JPN  | 2005 | country | 6_Wpr   | Japan   | 1601 | 2636 | 4237 | 0.0014234 | 0.0023436 | 0.003767  | 1124771    | 729                           | 892                             | 1621                            |
| JPN  | 2006 | country | 6_Wpr   | Japan   | 1511 | 2579 | 4090 | 0.0013478 | 0.0023004 | 0.0036482 | 1121089    | 676                           | 881                             | 1557                            |
| JPN  | 2007 | country | 6_Wpr   | Japan   | 1429 | 2520 | 3949 | 0.0012788 | 0.0022551 | 0.003534  | 1117445    | 648                           | 921                             | 1569                            |
| JPN  | 2008 | country | 6_Wpr   | Japan   | 1354 | 2458 | 3812 | 0.0012155 | 0.0022065 | 0.003422  | 1113957    | 612                           | 895                             | 1507                            |
| JPN  | 2009 | country | 6_Wpr   | Japan   | 1282 | 2396 | 3678 | 0.0011547 | 0.0021581 | 0.0033129 | 1110221    | 580                           | 902                             | 1482                            |
| JPN  | 2010 | country | 6_Wpr   | Japan   | 1211 | 2336 | 3547 | 0.0010975 | 0.0021171 | 0.0032146 | 1103396    | 575                           | 883                             | 1458                            |
| JPN  | 2011 | country | 6_Wpr   | Japan   | 1145 | 2389 | 3534 | 0.0010467 | 0.0021838 | 0.0032305 | 1093955    | 516                           | 746                             | 1261                            |
| JPN  | 2012 | country | 6_Wpr   | Japan   | 1083 | 2200 | 3283 | 0.0010029 | 0.0020374 | 0.0030403 | 1079820    | 481                           | 848                             | 1329                            |
| JPN  | 2013 | country | 6_Wpr   | Japan   | 1033 | 2113 | 3146 | 0.0009719 | 0.001988  | 0.0029599 | 1062866    | 496                           | 804                             | 1300                            |
| JPN  | 2014 | country | 6_Wpr   | Japan   | 986  | 2020 | 3006 | 0.0009457 | 0.0019375 | 0.0028832 | 1042577    | 465                           | 777                             | 1242                            |
| JPN  | 2015 | country | 6_Wpr   | Japan   | 940  | 1926 | 2866 | 0.0009226 | 0.0018903 | 0.0028129 | 1018887    | 445                           | 743                             | 1188                            |
| JPN  | 2016 | country | 6_Wpr   | Japan   | 894  | 1832 | 2726 | 0.0008993 | 0.0018428 | 0.0027421 | 994142     | 388                           | 726                             | 1114                            |
| JPN  | 2017 | country | 6_Wpr   | Japan   | 853  | 1738 | 2591 | 0.0008792 | 0.0017913 | 0.0026705 | 970241     | 392                           | 676                             | 1068                            |
| JPN  | 2018 | country | 6_Wpr   | Japan   | 816  | 1648 | 2464 | 0.000861  | 0.0017389 | 0.0025999 | 947735     | 372                           | 641                             | 1013                            |
| JPN  | 2019 | country | 6_Wpr   | Japan   | 782  | 1561 | 2343 | 0.0008435 | 0.0016837 | 0.0025272 | 927108     | 352                           | 607                             | 959                             |

| iso3 | year | level   | whoreg6 | whoname    | nnd   | pnd   | u5d    | nmr       | pnmr      | u5mr      | Livebirths | Neonatal birth defects deaths | 1-59 month birth defects deaths | Under five birth defects deaths |
|------|------|---------|---------|------------|-------|-------|--------|-----------|-----------|-----------|------------|-------------------------------|---------------------------------|---------------------------------|
| KAZ  | 2000 | country | 4_Eur   | Kazakhstan | 5372  | 4678  | 10050  | 0.0227275 | 0.0197914 | 0.0425189 | 236366     | 609                           | 829                             | 1439                            |
| KAZ  | 2001 | country | 4_Eur   | Kazakhstan | 5286  | 4151  | 9437   | 0.0220503 | 0.0173157 | 0.039366  | 239724     | 595                           | 700                             | 1295                            |
| KAZ  | 2002 | country | 4_Eur   | Kazakhstan | 5300  | 3743  | 9043   | 0.0213818 | 0.0151004 | 0.0364821 | 247875     | 600                           | 648                             | 1248                            |
| KAZ  | 2003 | country | 4_Eur   | Kazakhstan | 5387  | 3438  | 8825   | 0.0207155 | 0.0132207 | 0.0339362 | 260047     | 626                           | 658                             | 1284                            |
| KAZ  | 2004 | country | 4_Eur   | Kazakhstan | 5520  | 3204  | 8724   | 0.0200474 | 0.0116362 | 0.0316836 | 275348     | 643                           | 616                             | 1259                            |
| KAZ  | 2005 | country | 4_Eur   | Kazakhstan | 5644  | 3021  | 8665   | 0.0192905 | 0.0103254 | 0.029616  | 292579     | 709                           | 583                             | 1292                            |
| KAZ  | 2006 | country | 4_Eur   | Kazakhstan | 5686  | 2892  | 8578   | 0.0183109 | 0.0093132 | 0.0276241 | 310526     | 754                           | 562                             | 1316                            |
| KAZ  | 2007 | country | 4_Eur   | Kazakhstan | 5540  | 2874  | 8414   | 0.0168908 | 0.0087625 | 0.0256532 | 327990     | 812                           | 573                             | 1385                            |
| KAZ  | 2008 | country | 4_Eur   | Kazakhstan | 5259  | 2889  | 8148   | 0.0152965 | 0.008403  | 0.0236995 | 343805     | 860                           | 604                             | 1465                            |
| KAZ  | 2009 | country | 4_Eur   | Kazakhstan | 4845  | 2931  | 7776   | 0.0135624 | 0.0082046 | 0.021767  | 357238     | 885                           | 654                             | 1539                            |
| KAZ  | 2010 | country | 4_Eur   | Kazakhstan | 4343  | 2957  | 7300   | 0.0118041 | 0.008037  | 0.0198411 | 367924     | 875                           | 694                             | 1570                            |
| KAZ  | 2011 | country | 4_Eur   | Kazakhstan | 3806  | 2935  | 6741   | 0.0101192 | 0.0078034 | 0.0179226 | 376116     | 865                           | 724                             | 1589                            |
| KAZ  | 2012 | country | 4_Eur   | Kazakhstan | 3291  | 2854  | 6145   | 0.0086101 | 0.0074668 | 0.0160768 | 382227     | 791                           | 739                             | 1530                            |
| KAZ  | 2013 | country | 4_Eur   | Kazakhstan | 2835  | 2729  | 5564   | 0.0073241 | 0.0070503 | 0.0143744 | 387078     | 686                           | 739                             | 1426                            |
| KAZ  | 2014 | country | 4_Eur   | Kazakhstan | 2460  | 2577  | 5037   | 0.0063011 | 0.0066008 | 0.0129019 | 390408     | 622                           | 727                             | 1348                            |
| KAZ  | 2015 | country | 4_Eur   | Kazakhstan | 2177  | 2427  | 4604   | 0.0055512 | 0.0061887 | 0.0117399 | 392166     | 548                           | 707                             | 1255                            |
| KAZ  | 2016 | country | 4_Eur   | Kazakhstan | 1989  | 2297  | 4286   | 0.0050781 | 0.0058644 | 0.0109425 | 391682     | 512                           | 685                             | 1197                            |
| KAZ  | 2017 | country | 4_Eur   | Kazakhstan | 1873  | 2210  | 4083   | 0.0048166 | 0.0056833 | 0.0104999 | 388862     | 491                           | 674                             | 1164                            |
| KAZ  | 2018 | country | 4_Eur   | Kazakhstan | 1802  | 2185  | 3987   | 0.0046958 | 0.0056938 | 0.0103895 | 383751     | 475                           | 677                             | 1152                            |
| KAZ  | 2019 | country | 4_Eur   | Kazakhstan | 1757  | 2219  | 3976   | 0.0046656 | 0.0058924 | 0.010558  | 376587     | 464                           | 696                             | 1160                            |
| KEN  | 2000 | country | 1_Afr   | Kenya      | 36541 | 85218 | 121759 | 0.0285349 | 0.0665465 | 0.0950814 | 1280572    | 1953                          | 1460                            | 3412                            |
| KEN  | 2001 | country | 1_Afr   | Kenya      | 37125 | 81948 | 119073 | 0.0283843 | 0.0626544 | 0.0910387 | 1307943    | 2052                          | 1388                            | 3440                            |
| KEN  | 2002 | country | 1_Afr   | Kenya      | 37558 | 78133 | 115691 | 0.0281459 | 0.058553  | 0.0866989 | 1334404    | 2058                          | 1553                            | 3611                            |
| KEN  | 2003 | country | 1_Afr   | Kenya      | 37893 | 73848 | 111741 | 0.0278538 | 0.0542831 | 0.0821369 | 1360425    | 2066                          | 1456                            | 3522                            |
| KEN  | 2004 | country | 1_Afr   | Kenya      | 38103 | 70277 | 108380 | 0.0274983 | 0.050718  | 0.0782164 | 1385649    | 2103                          | 1673                            | 3776                            |
| KEN  | 2005 | country | 1_Afr   | Kenya      | 38145 | 66212 | 104357 | 0.0270668 | 0.0469825 | 0.0740493 | 1409292    | 2104                          | 2545                            | 4649                            |
| KEN  | 2006 | country | 1_Afr   | Kenya      | 37975 | 62524 | 100499 | 0.0265496 | 0.0437127 | 0.0702622 | 1430344    | 2125                          | 3269                            | 5394                            |
| KEN  | 2007 | country | 1_Afr   | Kenya      | 37661 | 58900 | 96561  | 0.0260092 | 0.0406769 | 0.066686  | 1447989    | 2167                          | 2438                            | 4605                            |
| KEN  | 2008 | country | 1_Afr   | Kenya      | 37203 | 54302 | 91505  | 0.0254516 | 0.0371495 | 0.0626011 | 1461717    | 2186                          | 3136                            | 5322                            |
| KEN  | 2009 | country | 1_Afr   | Kenya      | 36701 | 50609 | 87310  | 0.0249411 | 0.0343926 | 0.0593337 | 1471508    | 2152                          | 3027                            | 5179                            |
| KEN  | 2010 | country | 1_Afr   | Kenya      | 36195 | 48137 | 84332  | 0.024503  | 0.0325871 | 0.0570902 | 1477164    | 2122                          | 2876                            | 4998                            |
| KEN  | 2011 | country | 1_Afr   | Kenya      | 35652 | 46530 | 82182  | 0.0241082 | 0.0314638 | 0.055572  | 1478832    | 2144                          | 3176                            | 5320                            |
| KEN  | 2012 | country | 1_Afr   | Kenya      | 35070 | 45239 | 80309  | 0.023737  | 0.0306201 | 0.0543571 | 1477439    | 2077                          | 3601                            | 5678                            |
| KEN  | 2013 | country | 1_Afr   | Kenya      | 34536 | 42968 | 77504  | 0.0234252 | 0.0291443 | 0.0525695 | 1474312    | 2122                          | 3600                            | 5722                            |
| KEN  | 2014 | country | 1_Afr   | Kenya      | 33919 | 41323 | 75242  | 0.0230636 | 0.0280977 | 0.0511613 | 1470675    | 2122                          | 3632                            | 5754                            |
| KEN  | 2015 | country | 1_Afr   | Kenya      | 33339 | 39346 | 72685  | 0.0227091 | 0.0268005 | 0.0495095 | 1468092    | 2098                          | 3591                            | 5689                            |
| KEN  | 2016 | country | 1_Afr   | Kenya      | 32755 | 37217 | 69972  | 0.0223113 | 0.0253504 | 0.0476618 | 1468087    | 2120                          | 3388                            | 5508                            |
| KEN  | 2017 | country | 1_Afr   | Kenya      | 32272 | 35591 | 67863  | 0.0219312 | 0.0241867 | 0.0461179 | 1471512    | 2095                          | 2711                            | 4806                            |
| KEN  | 2018 | country | 1_Afr   | Kenya      | 31765 | 33661 | 65426  | 0.0214807 | 0.0227632 | 0.0442439 | 1478766    | 2059                          | 2674                            | 4732                            |
| KEN  | 2019 | country | 1_Afr   | Kenya      | 31343 | 32314 | 63657  | 0.0210365 | 0.0216885 | 0.042725  | 1489933    | 2078                          | 2605                            | 4682                            |

| iso3 | year | level   | whoreg6 | whoname    | nnd   | pnd   | u5d   | nmr       | pnmr      | u5mr      | Livebirths | Neonatal birth defects deaths | 1-59 month birth defects deaths | Under five birth defects deaths |
|------|------|---------|---------|------------|-------|-------|-------|-----------|-----------|-----------|------------|-------------------------------|---------------------------------|---------------------------------|
| KGZ  | 2000 | country | 4_Eur   | Kyrgyzstan | 2166  | 3161  | 5327  | 0.0205229 | 0.0299505 | 0.0504734 | 105541     | 249                           | 150                             | 398                             |
| KGZ  | 2001 | country | 4_Eur   | Kyrgyzstan | 2093  | 2878  | 4971  | 0.0201331 | 0.0276842 | 0.0478173 | 103958     | 236                           | 200                             | 436                             |
| KGZ  | 2002 | country | 4_Eur   | Kyrgyzstan | 2061  | 2621  | 4682  | 0.0198995 | 0.0253064 | 0.0452059 | 103571     | 237                           | 199                             | 437                             |
| KGZ  | 2003 | country | 4_Eur   | Kyrgyzstan | 2061  | 2405  | 4466  | 0.019739  | 0.0230336 | 0.0427726 | 104413     | 236                           | 182                             | 418                             |
| KGZ  | 2004 | country | 4_Eur   | Kyrgyzstan | 2086  | 2226  | 4312  | 0.0195609 | 0.0208737 | 0.0404346 | 106641     | 241                           | 254                             | 496                             |
| KGZ  | 2005 | country | 4_Eur   | Kyrgyzstan | 2133  | 2089  | 4222  | 0.0193283 | 0.0189296 | 0.038258  | 110356     | 253                           | 195                             | 448                             |
| KGZ  | 2006 | country | 4_Eur   | Kyrgyzstan | 2207  | 1985  | 4192  | 0.0190704 | 0.0171521 | 0.0362225 | 115729     | 269                           | 195                             | 464                             |
| KGZ  | 2007 | country | 4_Eur   | Kyrgyzstan | 2300  | 1896  | 4196  | 0.0187877 | 0.0154876 | 0.0342754 | 122420     | 283                           | 206                             | 490                             |
| KGZ  | 2008 | country | 4_Eur   | Kyrgyzstan | 2386  | 1806  | 4192  | 0.0183464 | 0.0138867 | 0.0322331 | 130053     | 303                           | 200                             | 503                             |
| KGZ  | 2009 | country | 4_Eur   | Kyrgyzstan | 2454  | 1711  | 4165  | 0.0177732 | 0.012392  | 0.0301652 | 138073     | 317                           | 202                             | 519                             |
| KGZ  | 2010 | country | 4_Eur   | Kyrgyzstan | 2505  | 1614  | 4119  | 0.0171814 | 0.0110701 | 0.0282515 | 145798     | 342                           | 213                             | 555                             |
| KGZ  | 2011 | country | 4_Eur   | Kyrgyzstan | 2519  | 1543  | 4062  | 0.0165136 | 0.0101153 | 0.0266288 | 152541     | 360                           | 218                             | 578                             |
| KGZ  | 2012 | country | 4_Eur   | Kyrgyzstan | 2518  | 1472  | 3990  | 0.015964  | 0.0093324 | 0.0252964 | 157730     | 370                           | 191                             | 562                             |
| KGZ  | 2013 | country | 4_Eur   | Kyrgyzstan | 2509  | 1382  | 3891  | 0.0155679 | 0.0085751 | 0.024143  | 161165     | 390                           | 221                             | 611                             |
| KGZ  | 2014 | country | 4_Eur   | Kyrgyzstan | 2466  | 1297  | 3763  | 0.0151634 | 0.0079752 | 0.0231387 | 162628     | 390                           | 237                             | 627                             |
| KGZ  | 2015 | country | 4_Eur   | Kyrgyzstan | 2384  | 1218  | 3602  | 0.0146907 | 0.0075056 | 0.0221962 | 162280     | 395                           | 268                             | 663                             |
| KGZ  | 2016 | country | 4_Eur   | Kyrgyzstan | 2265  | 1145  | 3410  | 0.0141052 | 0.0071305 | 0.0212357 | 160579     | 392                           | 254                             | 646                             |
| KGZ  | 2017 | country | 4_Eur   | Kyrgyzstan | 2125  | 1077  | 3202  | 0.0134459 | 0.0068147 | 0.0202605 | 158041     | 383                           | 224                             | 607                             |
| KGZ  | 2018 | country | 4_Eur   | Kyrgyzstan | 1995  | 1007  | 3002  | 0.012843  | 0.0064826 | 0.0193256 | 155338     | 375                           | 210                             | 585                             |
| KGZ  | 2019 | country | 4_Eur   | Kyrgyzstan | 1880  | 944   | 2824  | 0.0123037 | 0.006178  | 0.0184817 | 152800     | 357                           | 197                             | 554                             |
| KHM  | 2000 | country | 6_Wpr   | Cambodia   | 11980 | 24982 | 36962 | 0.0352513 | 0.0735098 | 0.1087611 | 339845     | 735                           | 291                             | 1026                            |
| KHM  | 2001 | country | 6_Wpr   | Cambodia   | 11291 | 21737 | 33028 | 0.0333964 | 0.0642947 | 0.0976911 | 338090     | 709                           | 269                             | 978                             |
| KHM  | 2002 | country | 6_Wpr   | Cambodia   | 10649 | 18360 | 29009 | 0.0314977 | 0.0543044 | 0.0858021 | 338088     | 704                           | 235                             | 939                             |
| KHM  | 2003 | country | 6_Wpr   | Cambodia   | 10108 | 15873 | 25981 | 0.0297418 | 0.0467054 | 0.0764473 | 339858     | 708                           | 329                             | 1037                            |
| KHM  | 2004 | country | 6_Wpr   | Cambodia   | 9660  | 14069 | 23729 | 0.0281492 | 0.0409967 | 0.0691459 | 343172     | 705                           | 481                             | 1186                            |
| KHM  | 2005 | country | 6_Wpr   | Cambodia   | 9319  | 12690 | 22009 | 0.0268121 | 0.0365121 | 0.0633242 | 347567     | 701                           | 475                             | 1175                            |
| KHM  | 2006 | country | 6_Wpr   | Cambodia   | 9023  | 11634 | 20657 | 0.0256003 | 0.0330081 | 0.0586084 | 352457     | 705                           | 461                             | 1166                            |
| KHM  | 2007 | country | 6_Wpr   | Cambodia   | 8746  | 10745 | 19491 | 0.0244885 | 0.0300846 | 0.0545731 | 357147     | 709                           | 479                             | 1187                            |
| KHM  | 2008 | country | 6_Wpr   | Cambodia   | 8440  | 10230 | 18670 | 0.023377  | 0.0283353 | 0.0517124 | 361038     | 706                           | 602                             | 1308                            |
| KHM  | 2009 | country | 6_Wpr   | Cambodia   | 8101  | 9545  | 17646 | 0.0222605 | 0.0262284 | 0.0484889 | 363918     | 690                           | 632                             | 1321                            |
| KHM  | 2010 | country | 6_Wpr   | Cambodia   | 7748  | 8352  | 16100 | 0.0211871 | 0.0228387 | 0.0440258 | 365693     | 680                           | 603                             | 1284                            |
| KHM  | 2011 | country | 6_Wpr   | Cambodia   | 7377  | 7499  | 14876 | 0.0201237 | 0.0204563 | 0.0405801 | 366582     | 674                           | 561                             | 1235                            |
| KHM  | 2012 | country | 6_Wpr   | Cambodia   | 7025  | 6712  | 13737 | 0.0191416 | 0.0182876 | 0.0374292 | 367002     | 694                           | 501                             | 1194                            |
| KHM  | 2013 | country | 6_Wpr   | Cambodia   | 6708  | 6175  | 12883 | 0.0182644 | 0.0168123 | 0.0350768 | 367271     | 734                           | 432                             | 1166                            |
| KHM  | 2014 | country | 6_Wpr   | Cambodia   | 6441  | 5723  | 12164 | 0.0175279 | 0.015574  | 0.0331019 | 367471     | 765                           | 434                             | 1199                            |
| KHM  | 2015 | country | 6_Wpr   | Cambodia   | 6199  | 5349  | 11548 | 0.0168709 | 0.0145578 | 0.0314287 | 367437     | 779                           | 432                             | 1211                            |
| KHM  | 2016 | country | 6_Wpr   | Cambodia   | 5987  | 5013  | 11000 | 0.0163091 | 0.0136567 | 0.0299659 | 367095     | 804                           | 417                             | 1221                            |
| KHM  | 2017 | country | 6_Wpr   | Cambodia   | 5765  | 4766  | 10531 | 0.0157393 | 0.0130111 | 0.0287504 | 366281     | 829                           | 398                             | 1227                            |
| KHM  | 2018 | country | 6_Wpr   | Cambodia   | 5506  | 4561  | 10067 | 0.0150923 | 0.0125015 | 0.0275939 | 364821     | 821                           | 405                             | 1226                            |
| KHM  | 2019 | country | 6_Wpr   | Cambodia   | 5257  | 4426  | 9683  | 0.0144907 | 0.0121988 | 0.0266895 | 362783     | 826                           | 416                             | 1242                            |

| iso3 | year | level   | whoreg6 | whoname               | nnd | pnd | u5d | nmr       | pnmr      | u5mr      | Livebirths | Neonatal birth defects deaths | 1-59 month birth defects deaths | Under five birth defects deaths |
|------|------|---------|---------|-----------------------|-----|-----|-----|-----------|-----------|-----------|------------|-------------------------------|---------------------------------|---------------------------------|
| KIR  | 2000 | country | 6_Wpr   | Kiribati              | 74  | 108 | 182 | 0.0287168 | 0.041911  | 0.0706278 | 2577       | 7                             | 6                               | 13                              |
| KIR  | 2001 | country | 6_Wpr   | Kiribati              | 73  | 105 | 178 | 0.0280427 | 0.0403354 | 0.0683781 | 2603       | 7                             | 6                               | 12                              |
| KIR  | 2002 | country | 6_Wpr   | Kiribati              | 72  | 103 | 175 | 0.0274822 | 0.0393148 | 0.0667969 | 2620       | 7                             | 8                               | 14                              |
| KIR  | 2003 | country | 6_Wpr   | Kiribati              | 72  | 101 | 173 | 0.0270371 | 0.037927  | 0.0649641 | 2663       | 6                             | 5                               | 12                              |
| KIR  | 2004 | country | 6_Wpr   | Kiribati              | 72  | 102 | 174 | 0.0266557 | 0.0377622 | 0.0644179 | 2701       | 6                             | 4                               | 10                              |
| KIR  | 2005 | country | 6_Wpr   | Kiribati              | 72  | 104 | 176 | 0.0264571 | 0.0382159 | 0.064673  | 2721       | 7                             | 7                               | 14                              |
| KIR  | 2006 | country | 6_Wpr   | Kiribati              | 73  | 107 | 180 | 0.0262788 | 0.0385182 | 0.064797  | 2778       | 7                             | 4                               | 11                              |
| KIR  | 2007 | country | 6_Wpr   | Kiribati              | 75  | 108 | 183 | 0.0261763 | 0.0376939 | 0.0638702 | 2865       | 7                             | 9                               | 16                              |
| KIR  | 2008 | country | 6_Wpr   | Kiribati              | 76  | 111 | 187 | 0.0260487 | 0.0380448 | 0.0640936 | 2918       | 7                             | 6                               | 13                              |
| KIR  | 2009 | country | 6_Wpr   | Kiribati              | 77  | 112 | 189 | 0.0258996 | 0.0376722 | 0.0635719 | 2973       | 7                             | 8                               | 15                              |
| KIR  | 2010 | country | 6_Wpr   | Kiribati              | 78  | 112 | 190 | 0.0256673 | 0.0368556 | 0.062523  | 3039       | 8                             | 10                              | 17                              |
| KIR  | 2011 | country | 6_Wpr   | Kiribati              | 78  | 112 | 190 | 0.0253938 | 0.0364628 | 0.0618566 | 3072       | 8                             | 10                              | 18                              |
| KIR  | 2012 | country | 6_Wpr   | Kiribati              | 78  | 111 | 189 | 0.025089  | 0.0357036 | 0.0607927 | 3109       | 8                             | 10                              | 18                              |
| KIR  | 2013 | country | 6_Wpr   | Kiribati              | 78  | 110 | 188 | 0.0246664 | 0.0347859 | 0.0594523 | 3162       | 8                             | 11                              | 19                              |
| KIR  | 2014 | country | 6_Wpr   | Kiribati              | 78  | 107 | 185 | 0.0243139 | 0.0333537 | 0.0576677 | 3208       | 8                             | 10                              | 18                              |
| KIR  | 2015 | country | 6_Wpr   | Kiribati              | 77  | 105 | 182 | 0.0238323 | 0.0324986 | 0.0563308 | 3231       | 8                             | 9                               | 18                              |
| KIR  | 2016 | country | 6_Wpr   | Kiribati              | 76  | 102 | 178 | 0.0233902 | 0.0313922 | 0.0547824 | 3249       | 8                             | 9                               | 17                              |
| KIR  | 2017 | country | 6_Wpr   | Kiribati              | 74  | 99  | 173 | 0.0230206 | 0.0307978 | 0.0538184 | 3215       | 8                             | 9                               | 17                              |
| KIR  | 2018 | country | 6_Wpr   | Kiribati              | 73  | 96  | 169 | 0.0225589 | 0.0296665 | 0.0522254 | 3236       | 8                             | 9                               | 17                              |
| KIR  | 2019 | country | 6_Wpr   | Kiribati              | 72  | 92  | 164 | 0.022115  | 0.0282581 | 0.0503731 | 3256       | 8                             | 9                               | 17                              |
| KNA  | 2000 | country | 2_Amr   | Saint Kitts and Nevis | 13  | 6   | 19  | 0.0165889 | 0.0076564 | 0.0242453 | 784        | 1                             | 2                               | 3                               |
| KNA  | 2001 | country | 2_Amr   | Saint Kitts and Nevis | 12  | 6   | 18  | 0.0159488 | 0.0079744 | 0.0239232 | 752        | 0                             | 1                               | 1                               |
| KNA  | 2002 | country | 2_Amr   | Saint Kitts and Nevis | 11  | 5   | 16  | 0.0152475 | 0.0069307 | 0.0221782 | 721        | 0                             | 1                               | 1                               |
| KNA  | 2003 | country | 2_Amr   | Saint Kitts and Nevis | 11  | 5   | 16  | 0.0145263 | 0.0066029 | 0.0211292 | 757        | 1                             | 0                               | 1                               |
| KNA  | 2004 | country | 2_Amr   | Saint Kitts and Nevis | 10  | 5   | 15  | 0.013867  | 0.0069335 | 0.0208005 | 721        | 1                             | 0                               | 1                               |
| KNA  | 2005 | country | 2_Amr   | Saint Kitts and Nevis | 10  | 4   | 14  | 0.0132626 | 0.005305  | 0.0185677 | 754        | 3                             | 2                               | 5                               |
| KNA  | 2006 | country | 2_Amr   | Saint Kitts and Nevis | 9   | 5   | 14  | 0.0127761 | 0.0070978 | 0.0198739 | 704        | 0                             | 1                               | 1                               |
| KNA  | 2007 | country | 2_Amr   | Saint Kitts and Nevis | 9   | 4   | 13  | 0.0123861 | 0.0055049 | 0.017891  | 727        | 1                             | 1                               | 2                               |
| KNA  | 2008 | country | 2_Amr   | Saint Kitts and Nevis | 9   | 4   | 13  | 0.0121008 | 0.0053781 | 0.0174789 | 744        | 1                             | 0                               | 1                               |
| KNA  | 2009 | country | 2_Amr   | Saint Kitts and Nevis | 9   | 4   | 13  | 0.0118946 | 0.0052865 | 0.0171811 | 757        | 1                             | 0                               | 1                               |
| KNA  | 2010 | country | 2_Amr   | Saint Kitts and Nevis | 9   | 4   | 13  | 0.0117339 | 0.005215  | 0.0169489 | 767        | 0                             | 0                               | 0                               |
| KNA  | 2011 | country | 2_Amr   | Saint Kitts and Nevis | 8   | 5   | 13  | 0.0116322 | 0.0072702 | 0.0189024 | 688        | 0                             | 1                               | 1                               |
| KNA  | 2012 | country | 2_Amr   | Saint Kitts and Nevis | 8   | 5   | 13  | 0.0115621 | 0.0072263 | 0.0187884 | 692        | 3                             | 1                               | 4                               |
| KNA  | 2013 | country | 2_Amr   | Saint Kitts and Nevis | 8   | 5   | 13  | 0.0115138 | 0.0071961 | 0.01871   | 695        | 0                             | 0                               | 0                               |
| KNA  | 2014 | country | 2_Amr   | Saint Kitts and Nevis | 8   | 4   | 12  | 0.0114397 | 0.0057199 | 0.0171596 | 699        | 1                             | 0                               | 1                               |
| KNA  | 2015 | country | 2_Amr   | Saint Kitts and Nevis | 8   | 4   | 12  | 0.0112985 | 0.0056492 | 0.0169477 | 708        | 2                             | 1                               | 3                               |
| KNA  | 2016 | country | 2_Amr   | Saint Kitts and Nevis | 8   | 4   | 12  | 0.0110996 | 0.0055498 | 0.0166494 | 721        | 2                             | 0                               | 2                               |
| KNA  | 2017 | country | 2_Amr   | Saint Kitts and Nevis | 8   | 3   | 11  | 0.0108577 | 0.0040717 | 0.0149294 | 737        | 1                             | 0                               | 2                               |
| KNA  | 2018 | country | 2_Amr   | Saint Kitts and Nevis | 7   | 4   | 11  | 0.0105728 | 0.0060416 | 0.0166145 | 662        | 2                             | 0                               | 2                               |
| KNA  | 2019 | country | 2_Amr   | Saint Kitts and Nevis | 7   | 4   | 11  | 0.0102799 | 0.0058743 | 0.0161542 | 681        | 1                             | 0                               | 2                               |

| iso3 | year | level   | whoreg6 | whoname           | nnd  | pnd  | u5d  | nmr       | pnmr      | u5mr      | Livebirths | Neonatal birth defects deaths | 1-59 month birth defects deaths | Under five birth defects deaths |
|------|------|---------|---------|-------------------|------|------|------|-----------|-----------|-----------|------------|-------------------------------|---------------------------------|---------------------------------|
| KOR  | 2000 | country | 6_Wpr   | Republic of Korea | 1938 | 2510 | 4448 | 0.0033992 | 0.0044025 | 0.0078016 | 570136     | 537                           | 528                             | 1065                            |
| KOR  | 2001 | country | 6_Wpr   | Republic of Korea | 1737 | 2298 | 4035 | 0.0031912 | 0.0042219 | 0.0074131 | 544310     | 421                           | 471                             | 892                             |
| KOR  | 2002 | country | 6_Wpr   | Republic of Korea | 1561 | 2095 | 3656 | 0.0029984 | 0.0040242 | 0.0070226 | 520603     | 419                           | 489                             | 908                             |
| KOR  | 2003 | country | 6_Wpr   | Republic of Korea | 1406 | 1899 | 3305 | 0.0028099 | 0.0037951 | 0.006605  | 500376     | 342                           | 453                             | 794                             |
| KOR  | 2004 | country | 6_Wpr   | Republic of Korea | 1264 | 1720 | 2984 | 0.0026125 | 0.0035549 | 0.0061674 | 483837     | 285                           | 387                             | 672                             |
| KOR  | 2005 | country | 6_Wpr   | Republic of Korea | 1129 | 1565 | 2694 | 0.0023919 | 0.0033156 | 0.0057075 | 472009     | 230                           | 345                             | 575                             |
| KOR  | 2006 | country | 6_Wpr   | Republic of Korea | 1011 | 1435 | 2446 | 0.0021767 | 0.0030895 | 0.0052662 | 464475     | 227                           | 308                             | 534                             |
| KOR  | 2007 | country | 6_Wpr   | Republic of Korea | 921  | 1325 | 2246 | 0.0020019 | 0.00288   | 0.0048819 | 460063     | 203                           | 313                             | 516                             |
| KOR  | 2008 | country | 6_Wpr   | Republic of Korea | 860  | 1232 | 2092 | 0.0018795 | 0.0026925 | 0.004572  | 457565     | 151                           | 301                             | 451                             |
| KOR  | 2009 | country | 6_Wpr   | Republic of Korea | 822  | 1151 | 1973 | 0.0018012 | 0.0025221 | 0.0043232 | 456373     | 155                           | 276                             | 431                             |
| KOR  | 2010 | country | 6_Wpr   | Republic of Korea | 798  | 1082 | 1880 | 0.0017538 | 0.002378  | 0.0041319 | 455000     | 139                           | 276                             | 415                             |
| KOR  | 2011 | country | 6_Wpr   | Republic of Korea | 782  | 1021 | 1803 | 0.0017302 | 0.0022589 | 0.0039891 | 451982     | 158                           | 239                             | 397                             |
| KOR  | 2012 | country | 6_Wpr   | Republic of Korea | 763  | 966  | 1729 | 0.0017092 | 0.002164  | 0.0038732 | 446405     | 144                           | 241                             | 385                             |
| KOR  | 2013 | country | 6_Wpr   | Republic of Korea | 739  | 913  | 1652 | 0.0016845 | 0.0020811 | 0.0037656 | 438709     | 162                           | 237                             | 398                             |
| KOR  | 2014 | country | 6_Wpr   | Republic of Korea | 710  | 862  | 1572 | 0.0016569 | 0.0020117 | 0.0036686 | 428499     | 151                           | 259                             | 410                             |
| KOR  | 2015 | country | 6_Wpr   | Republic of Korea | 678  | 812  | 1490 | 0.0016291 | 0.001951  | 0.0035801 | 416189     | 132                           | 237                             | 369                             |
| KOR  | 2016 | country | 6_Wpr   | Republic of Korea | 645  | 765  | 1410 | 0.0016001 | 0.0018978 | 0.0034978 | 403107     | 138                           | 198                             | 336                             |
| KOR  | 2017 | country | 6_Wpr   | Republic of Korea | 614  | 719  | 1333 | 0.0015768 | 0.0018464 | 0.0034232 | 389403     | 127                           | 204                             | 331                             |
| KOR  | 2018 | country | 6_Wpr   | Republic of Korea | 588  | 675  | 1263 | 0.0015575 | 0.001788  | 0.0033455 | 377520     | 121                           | 192                             | 312                             |
| KOR  | 2019 | country | 6_Wpr   | Republic of Korea | 565  | 635  | 1200 | 0.0015375 | 0.001728  | 0.0032654 | 367485     | 118                           | 180                             | 298                             |
| KWT  | 2000 | country | 5_Emr   | Kuwait            | 290  | 250  | 540  | 0.0065465 | 0.0056436 | 0.0121901 | 44298      | 147                           | 107                             | 254                             |
| KWT  | 2001 | country | 5_Emr   | Kuwait            | 285  | 251  | 536  | 0.0063626 | 0.0056036 | 0.0119662 | 44793      | 131                           | 112                             | 243                             |
| KWT  | 2002 | country | 5_Emr   | Kuwait            | 282  | 254  | 536  | 0.0061998 | 0.0055843 | 0.0117841 | 45485      | 130                           | 106                             | 236                             |
| KWT  | 2003 | country | 5_Emr   | Kuwait            | 282  | 257  | 539  | 0.0060579 | 0.0055209 | 0.0115788 | 46550      | 140                           | 110                             | 250                             |
| KWT  | 2004 | country | 5_Emr   | Kuwait            | 285  | 259  | 544  | 0.0059301 | 0.0053891 | 0.0113193 | 48060      | 143                           | 114                             | 256                             |
| KWT  | 2005 | country | 5_Emr   | Kuwait            | 290  | 262  | 552  | 0.0058293 | 0.0052665 | 0.0110958 | 49749      | 140                           | 115                             | 255                             |
| KWT  | 2006 | country | 5_Emr   | Kuwait            | 298  | 266  | 564  | 0.005767  | 0.0051477 | 0.0109147 | 51673      | 144                           | 131                             | 275                             |
| KWT  | 2007 | country | 5_Emr   | Kuwait            | 308  | 271  | 579  | 0.0057308 | 0.0050423 | 0.0107731 | 53745      | 134                           | 115                             | 248                             |
| KWT  | 2008 | country | 5_Emr   | Kuwait            | 317  | 274  | 591  | 0.0056869 | 0.0049155 | 0.0106024 | 55742      | 157                           | 127                             | 284                             |
| KWT  | 2009 | country | 5_Emr   | Kuwait            | 322  | 275  | 597  | 0.005602  | 0.0047844 | 0.0103864 | 57479      | 158                           | 107                             | 265                             |
| KWT  | 2010 | country | 5_Emr   | Kuwait            | 322  | 274  | 596  | 0.0054836 | 0.0046662 | 0.0101499 | 58720      | 167                           | 101                             | 268                             |
| KWT  | 2011 | country | 5_Emr   | Kuwait            | 320  | 269  | 589  | 0.0053504 | 0.0044977 | 0.0098481 | 59809      | 153                           | 89                              | 242                             |
| KWT  | 2012 | country | 5_Emr   | Kuwait            | 316  | 259  | 575  | 0.0052234 | 0.0042812 | 0.0095045 | 60497      | 146                           | 91                              | 237                             |
| KWT  | 2013 | country | 5_Emr   | Kuwait            | 311  | 248  | 559  | 0.0051052 | 0.0040711 | 0.0091763 | 60918      | 125                           | 91                              | 216                             |
| KWT  | 2014 | country | 5_Emr   | Kuwait            | 305  | 238  | 543  | 0.0050043 | 0.003905  | 0.0089093 | 60947      | 127                           | 78                              | 204                             |
| KWT  | 2015 | country | 5_Emr   | Kuwait            | 298  | 230  | 528  | 0.0049145 | 0.0037931 | 0.0087077 | 60636      | 127                           | 80                              | 207                             |
| KWT  | 2016 | country | 5_Emr   | Kuwait            | 289  | 222  | 511  | 0.0048266 | 0.0037077 | 0.0085343 | 59876      | 120                           | 77                              | 197                             |
| KWT  | 2017 | country | 5_Emr   | Kuwait            | 278  | 214  | 492  | 0.004732  | 0.0036426 | 0.0083746 | 58749      | 116                           | 75                              | 191                             |
| KWT  | 2018 | country | 5_Emr   | Kuwait            | 265  | 206  | 471  | 0.0046285 | 0.003598  | 0.0082264 | 57254      | 111                           | 72                              | 183                             |
| KWT  | 2019 | country | 5_Emr   | Kuwait            | 251  | 197  | 448  | 0.0045186 | 0.0035465 | 0.0080651 | 55548      | 105                           | 69                              | 173                             |

| iso3 | year | level   | whoreg6 | whoname           | nnd  | pnd   | u5d   | nmr       | pnmr      | u5mr      | Livebirths | Neonatal birth defects deaths | 1-59 month birth defects deaths | Under five birth defects deaths |
|------|------|---------|---------|-------------------|------|-------|-------|-----------|-----------|-----------|------------|-------------------------------|---------------------------------|---------------------------------|
| LAO  | 2000 | country | 6_Wpr   | Lao People's Demc | 6470 | 12008 | 18478 | 0.0380171 | 0.070557  | 0.108574  | 170187     | 292                           | 81                              | 373                             |
| LAO  | 2001 | country | 6_Wpr   | Lao People's Demc | 6235 | 11230 | 17465 | 0.0370835 | 0.0667941 | 0.1038777 | 168134     | 289                           | 105                             | 394                             |
| LAO  | 2002 | country | 6_Wpr   | Lao People's Demc | 6032 | 10494 | 16526 | 0.0361673 | 0.062923  | 0.0990903 | 166780     | 288                           | 124                             | 412                             |
| LAO  | 2003 | country | 6_Wpr   | Lao People's Demc | 5854 | 10416 | 16270 | 0.0352462 | 0.0627127 | 0.0979589 | 166089     | 287                           | 92                              | 380                             |
| LAO  | 2004 | country | 6_Wpr   | Lao People's Demc | 5697 | 10299 | 15996 | 0.034322  | 0.0620489 | 0.0963709 | 165987     | 297                           | 82                              | 379                             |
| LAO  | 2005 | country | 6_Wpr   | Lao People's Demc | 5553 | 9698  | 15251 | 0.0333835 | 0.0583044 | 0.0916879 | 166340     | 287                           | 96                              | 383                             |
| LAO  | 2006 | country | 6_Wpr   | Lao People's Demc | 5410 | 9098  | 14508 | 0.0324108 | 0.0545054 | 0.0869162 | 166920     | 295                           | 116                             | 411                             |
| LAO  | 2007 | country | 6_Wpr   | Lao People's Demc | 5271 | 9101  | 14372 | 0.0314663 | 0.0543287 | 0.085795  | 167512     | 298                           | 97                              | 395                             |
| LAO  | 2008 | country | 6_Wpr   | Lao People's Demc | 5125 | 7192  | 12317 | 0.0305304 | 0.0428467 | 0.0733771 | 167866     | 302                           | 134                             | 436                             |
| LAO  | 2009 | country | 6_Wpr   | Lao People's Demc | 4968 | 6841  | 11809 | 0.0295803 | 0.0407315 | 0.0703117 | 167950     | 310                           | 164                             | 475                             |
| LAO  | 2010 | country | 6_Wpr   | Lao People's Demc | 4802 | 6513  | 11315 | 0.0286228 | 0.0388225 | 0.0674453 | 167768     | 311                           | 191                             | 503                             |
| LAO  | 2011 | country | 6_Wpr   | Lao People's Demc | 4640 | 6198  | 10838 | 0.0277182 | 0.0370269 | 0.0647451 | 167399     | 321                           | 220                             | 541                             |
| LAO  | 2012 | country | 6_Wpr   | Lao People's Demc | 4491 | 5734  | 10225 | 0.0268773 | 0.0343174 | 0.0611946 | 167093     | 326                           | 235                             | 561                             |
| LAO  | 2013 | country | 6_Wpr   | Lao People's Demc | 4342 | 5410  | 9752  | 0.0260148 | 0.0324144 | 0.0584292 | 166905     | 327                           | 295                             | 622                             |
| LAO  | 2014 | country | 6_Wpr   | Lao People's Demc | 4204 | 5105  | 9309  | 0.0251967 | 0.0305983 | 0.055795  | 166847     | 334                           | 350                             | 683                             |
| LAO  | 2015 | country | 6_Wpr   | Lao People's Demc | 4079 | 4798  | 8877  | 0.0244401 | 0.0287455 | 0.0531856 | 166898     | 340                           | 316                             | 655                             |
| LAO  | 2016 | country | 6_Wpr   | Lao People's Demc | 3962 | 4545  | 8507  | 0.0237444 | 0.0272412 | 0.0509856 | 166860     | 336                           | 212                             | 548                             |
| LAO  | 2017 | country | 6_Wpr   | Lao People's Demc | 3850 | 4320  | 8170  | 0.0230947 | 0.0259126 | 0.0490073 | 166705     | 341                           | 237                             | 579                             |
| LAO  | 2018 | country | 6_Wpr   | Lao People's Demc | 3745 | 4085  | 7830  | 0.0225159 | 0.0245583 | 0.0470742 | 166327     | 343                           | 216                             | 559                             |
| LAO  | 2019 | country | 6_Wpr   | Lao People's Demc | 3637 | 3901  | 7538  | 0.0219562 | 0.0235472 | 0.0455034 | 165648     | 337                           | 211                             | 548                             |
| LBN  | 2000 | country | 5_Emr   | Lebanon           | 980  | 692   | 1672  | 0.0116914 | 0.008261  | 0.0199524 | 83822      | 216                           | 233                             | 448                             |
| LBN  | 2001 | country | 5_Emr   | Lebanon           | 902  | 645   | 1547  | 0.0110043 | 0.0078689 | 0.0188733 | 81968      | 207                           | 222                             | 429                             |
| LBN  | 2002 | country | 5_Emr   | Lebanon           | 823  | 595   | 1418  | 0.0103019 | 0.0074518 | 0.0177537 | 79888      | 199                           | 208                             | 407                             |
| LBN  | 2003 | country | 5_Emr   | Lebanon           | 750  | 570   | 1320  | 0.009629  | 0.0073147 | 0.0169437 | 77889      | 188                           | 195                             | 383                             |
| LBN  | 2004 | country | 5_Emr   | Lebanon           | 681  | 504   | 1185  | 0.008955  | 0.006621  | 0.0155761 | 76047      | 176                           | 181                             | 357                             |
| LBN  | 2005 | country | 5_Emr   | Lebanon           | 621  | 491   | 1112  | 0.008285  | 0.0065446 | 0.0148295 | 74955      | 165                           | 167                             | 332                             |
| LBN  | 2006 | country | 5_Emr   | Lebanon           | 574  | 459   | 1033  | 0.0076783 | 0.0061365 | 0.0138147 | 74756      | 153                           | 154                             | 308                             |
| LBN  | 2007 | country | 5_Emr   | Lebanon           | 540  | 393   | 933   | 0.0071164 | 0.0051751 | 0.0122914 | 75881      | 146                           | 145                             | 291                             |
| LBN  | 2008 | country | 5_Emr   | Lebanon           | 520  | 350   | 870   | 0.006656  | 0.0044743 | 0.0111303 | 78125      | 141                           | 138                             | 280                             |
| LBN  | 2009 | country | 5_Emr   | Lebanon           | 514  | 335   | 849   | 0.0062959 | 0.004098  | 0.0103939 | 81641      | 142                           | 134                             | 276                             |
| LBN  | 2010 | country | 5_Emr   | Lebanon           | 514  | 329   | 843   | 0.0059748 | 0.0038196 | 0.0097944 | 86028      | 142                           | 133                             | 275                             |
| LBN  | 2011 | country | 5_Emr   | Lebanon           | 520  | 329   | 849   | 0.0056929 | 0.0036008 | 0.0092937 | 91341      | 146                           | 135                             | 281                             |
| LBN  | 2012 | country | 5_Emr   | Lebanon           | 528  | 332   | 860   | 0.0054501 | 0.0034309 | 0.008881  | 96878      | 147                           | 137                             | 284                             |
| LBN  | 2013 | country | 5_Emr   | Lebanon           | 534  | 443   | 977   | 0.0052197 | 0.0043312 | 0.0095509 | 102305     | 147                           | 140                             | 287                             |
| LBN  | 2014 | country | 5_Emr   | Lebanon           | 536  | 349   | 885   | 0.0050034 | 0.0032537 | 0.0082571 | 107126     | 150                           | 144                             | 295                             |
| LBN  | 2015 | country | 5_Emr   | Lebanon           | 535  | 342   | 877   | 0.0048104 | 0.0030727 | 0.0078831 | 111218     | 149                           | 145                             | 294                             |
| LBN  | 2016 | country | 5_Emr   | Lebanon           | 529  | 347   | 876   | 0.0046315 | 0.0030389 | 0.0076703 | 114219     | 148                           | 147                             | 295                             |
| LBN  | 2017 | country | 5_Emr   | Lebanon           | 519  | 351   | 870   | 0.0044673 | 0.0030233 | 0.0074906 | 116177     | 146                           | 147                             | 293                             |
| LBN  | 2018 | country | 5_Emr   | Lebanon           | 505  | 398   | 903   | 0.0043122 | 0.0033963 | 0.0077085 | 117110     | 139                           | 147                             | 286                             |
| LBN  | 2019 | country | 5_Emr   | Lebanon           | 485  | 402   | 887   | 0.004152  | 0.0034433 | 0.0075953 | 116811     | 136                           | 146                             | 282                             |

| iso3 | year | level   | whoreg6 | whoname | nnd  | pnd   | u5d   | nmr       | pnmr      | u5mr      | Livebirths | Neonatal birth defects deaths | 1-59 month birth defects deaths | Under five birth defects deaths |
|------|------|---------|---------|---------|------|-------|-------|-----------|-----------|-----------|------------|-------------------------------|---------------------------------|---------------------------------|
| LBR  | 2000 | country | 1_Afr   | Liberia | 5343 | 18401 | 23744 | 0.0457163 | 0.1574471 | 0.2031634 | 116873     | 217                           | 16                              | 233                             |
| LBR  | 2001 | country | 1_Afr   | Liberia | 5274 | 16733 | 22007 | 0.0437245 | 0.1387228 | 0.1824472 | 120619     | 220                           | 17                              | 237                             |
| LBR  | 2002 | country | 1_Afr   | Liberia | 5186 | 13853 | 19039 | 0.0418063 | 0.1116761 | 0.1534824 | 124048     | 228                           | 18                              | 247                             |
| LBR  | 2003 | country | 1_Afr   | Liberia | 5092 | 12863 | 17955 | 0.040057  | 0.1011919 | 0.1412489 | 127119     | 227                           | 21                              | 247                             |
| LBR  | 2004 | country | 1_Afr   | Liberia | 5008 | 11908 | 16916 | 0.0385633 | 0.0916944 | 0.1302577 | 129864     | 232                           | 23                              | 254                             |
| LBR  | 2005 | country | 1_Afr   | Liberia | 4930 | 10637 | 15567 | 0.0372682 | 0.0804074 | 0.1176756 | 132284     | 233                           | 48                              | 281                             |
| LBR  | 2006 | country | 1_Afr   | Liberia | 4853 | 10178 | 15031 | 0.0360895 | 0.0756862 | 0.1117757 | 134471     | 242                           | 57                              | 299                             |
| LBR  | 2007 | country | 1_Afr   | Liberia | 4784 | 9771  | 14555 | 0.0350248 | 0.0715322 | 0.106557  | 136589     | 243                           | 77                              | 320                             |
| LBR  | 2008 | country | 1_Afr   | Liberia | 4733 | 9189  | 13922 | 0.0341263 | 0.0662547 | 0.100381  | 138691     | 249                           | 94                              | 343                             |
| LBR  | 2009 | country | 1_Afr   | Liberia | 4711 | 8972  | 13683 | 0.0334416 | 0.0636869 | 0.0971285 | 140873     | 255                           | 124                             | 379                             |
| LBR  | 2010 | country | 1_Afr   | Liberia | 4714 | 10020 | 14734 | 0.0329495 | 0.0700348 | 0.1029843 | 143067     | 264                           | 89                              | 353                             |
| LBR  | 2011 | country | 1_Afr   | Liberia | 4755 | 9300  | 14055 | 0.0327283 | 0.0640108 | 0.0967391 | 145287     | 258                           | 110                             | 368                             |
| LBR  | 2012 | country | 1_Afr   | Liberia | 4821 | 8473  | 13294 | 0.032696  | 0.0574633 | 0.0901593 | 147449     | 268                           | 149                             | 416                             |
| LBR  | 2013 | country | 1_Afr   | Liberia | 4899 | 8416  | 13315 | 0.0327677 | 0.0562926 | 0.0890603 | 149507     | 275                           | 123                             | 399                             |
| LBR  | 2014 | country | 1_Afr   | Liberia | 4995 | 8744  | 13739 | 0.0329638 | 0.0577035 | 0.0906673 | 151530     | 280                           | 79                              | 359                             |
| LBR  | 2015 | country | 1_Afr   | Liberia | 5068 | 10015 | 15083 | 0.0330228 | 0.0652557 | 0.0982785 | 153470     | 282                           | 90                              | 372                             |
| LBR  | 2016 | country | 1_Afr   | Liberia | 5138 | 9283  | 14421 | 0.0330658 | 0.05974   | 0.0928057 | 155387     | 291                           | 112                             | 403                             |
| LBR  | 2017 | country | 1_Afr   | Liberia | 5188 | 9641  | 14829 | 0.0329646 | 0.061257  | 0.0942216 | 157381     | 297                           | 119                             | 416                             |
| LBR  | 2018 | country | 1_Afr   | Liberia | 5227 | 9955  | 15182 | 0.0327765 | 0.0624267 | 0.0952032 | 159474     | 304                           | 166                             | 470                             |
| LBR  | 2019 | country | 1_Afr   | Liberia | 5239 | 9945  | 15184 | 0.0324162 | 0.0615337 | 0.09395   | 161617     | 305                           | 167                             | 473                             |
| LYB  | 2000 | country | 5_Emr   | Libya   | 1844 | 1414  | 3258  | 0.015869  | 0.0121685 | 0.0280375 | 116201     | 279                           | 367                             | 645                             |
| LYB  | 2001 | country | 5_Emr   | Libya   | 1797 | 1369  | 3166  | 0.0154024 | 0.0117339 | 0.0271364 | 116670     | 285                           | 370                             | 655                             |
| LYB  | 2002 | country | 5_Emr   | Libya   | 1760 | 1327  | 3087  | 0.0149386 | 0.0112634 | 0.026202  | 117815     | 290                           | 372                             | 662                             |
| LYB  | 2003 | country | 5_Emr   | Libya   | 1719 | 1290  | 3009  | 0.0143977 | 0.0108046 | 0.0252023 | 119394     | 297                           | 382                             | 678                             |
| LYB  | 2004 | country | 5_Emr   | Libya   | 1671 | 1249  | 2920  | 0.0137527 | 0.0102795 | 0.0240322 | 121504     | 303                           | 382                             | 685                             |
| LYB  | 2005 | country | 5_Emr   | Libya   | 1613 | 1201  | 2814  | 0.0130171 | 0.0096922 | 0.0227093 | 123914     | 307                           | 375                             | 683                             |
| LYB  | 2006 | country | 5_Emr   | Libya   | 1544 | 1147  | 2691  | 0.0122024 | 0.0090649 | 0.0212673 | 126532     | 315                           | 367                             | 683                             |
| LYB  | 2007 | country | 5_Emr   | Libya   | 1468 | 1088  | 2556  | 0.0113678 | 0.0084252 | 0.019793  | 129136     | 317                           | 361                             | 679                             |
| LYB  | 2008 | country | 5_Emr   | Libya   | 1393 | 1032  | 2425  | 0.0105926 | 0.0078475 | 0.0184401 | 131507     | 321                           | 353                             | 674                             |
| LYB  | 2009 | country | 5_Emr   | Libya   | 1326 | 986   | 2312  | 0.009928  | 0.0073824 | 0.0173104 | 133561     | 326                           | 344                             | 670                             |
| LYB  | 2010 | country | 5_Emr   | Libya   | 1266 | 949   | 2215  | 0.0093745 | 0.0070271 | 0.0164016 | 135048     | 317                           | 336                             | 654                             |
| LYB  | 2011 | country | 5_Emr   | Libya   | 1213 | 1145  | 2358  | 0.0089263 | 0.0084259 | 0.0173523 | 135890     | 297                           | 329                             | 626                             |
| LYB  | 2012 | country | 5_Emr   | Libya   | 1153 | 886   | 2039  | 0.0084812 | 0.0065172 | 0.0149984 | 135948     | 292                           | 321                             | 613                             |
| LYB  | 2013 | country | 5_Emr   | Libya   | 1097 | 854   | 1951  | 0.008106  | 0.0063104 | 0.0144164 | 135332     | 275                           | 313                             | 588                             |
| LYB  | 2014 | country | 5_Emr   | Libya   | 1045 | 815   | 1860  | 0.0077934 | 0.0060781 | 0.0138715 | 134088     | 262                           | 302                             | 564                             |
| LYB  | 2015 | country | 5_Emr   | Libya   | 992  | 783   | 1775  | 0.0074922 | 0.0059137 | 0.013406  | 132404     | 251                           | 294                             | 545                             |
| LYB  | 2016 | country | 5_Emr   | Libya   | 940  | 746   | 1686  | 0.0072133 | 0.0057246 | 0.0129379 | 130315     | 238                           | 283                             | 521                             |
| LYB  | 2017 | country | 5_Emr   | Libya   | 890  | 713   | 1603  | 0.0069464 | 0.0055649 | 0.0125113 | 128125     | 228                           | 273                             | 501                             |
| LYB  | 2018 | country | 5_Emr   | Libya   | 845  | 677   | 1522  | 0.0067106 | 0.0053764 | 0.012087  | 125920     | 223                           | 262                             | 485                             |
| LYB  | 2019 | country | 5_Emr   | Libya   | 803  | 645   | 1448  | 0.0064749 | 0.0052009 | 0.0116757 | 124018     | 212                           | 251                             | 463                             |

| iso3 | year | level   | whoreg6 | whoname     | nnd  | pnd  | u5d   | nmr       | pnmr      | u5mr      | Livebirths | Neonatal birth defects deaths | 1-59 month birth defects deaths | Under five birth defects deaths |
|------|------|---------|---------|-------------|------|------|-------|-----------|-----------|-----------|------------|-------------------------------|---------------------------------|---------------------------------|
| LCA  | 2000 | country | 2_Amr   | Saint Lucia | 34   | 22   | 56    | 0.0116976 | 0.007569  | 0.0192666 | 2907       | 6                             | 3                               | 9                               |
| LCA  | 2001 | country | 2_Amr   | Saint Lucia | 33   | 20   | 53    | 0.0119651 | 0.0072516 | 0.0192167 | 2758       | 5                             | 3                               | 8                               |
| LCA  | 2002 | country | 2_Amr   | Saint Lucia | 32   | 19   | 51    | 0.0122267 | 0.0072596 | 0.0194864 | 2617       | 3                             | 0                               | 3                               |
| LCA  | 2003 | country | 2_Amr   | Saint Lucia | 31   | 17   | 48    | 0.0120815 | 0.0066253 | 0.0187068 | 2566       | 6                             | 5                               | 11                              |
| LCA  | 2004 | country | 2_Amr   | Saint Lucia | 31   | 16   | 47    | 0.0127024 | 0.0065561 | 0.0192585 | 2440       | 5                             | 4                               | 9                               |
| LCA  | 2005 | country | 2_Amr   | Saint Lucia | 30   | 15   | 45    | 0.0124913 | 0.0062457 | 0.018737  | 2402       | 6                             | 2                               | 8                               |
| LCA  | 2006 | country | 2_Amr   | Saint Lucia | 30   | 15   | 45    | 0.0126742 | 0.0063371 | 0.0190113 | 2367       | 1                             | 2                               | 3                               |
| LCA  | 2007 | country | 2_Amr   | Saint Lucia | 30   | 14   | 44    | 0.0128599 | 0.0060013 | 0.0188612 | 2333       | 6                             | 3                               | 9                               |
| LCA  | 2008 | country | 2_Amr   | Saint Lucia | 30   | 14   | 44    | 0.0130446 | 0.0060875 | 0.019132  | 2300       | 16                            | 0                               | 16                              |
| LCA  | 2009 | country | 2_Amr   | Saint Lucia | 29   | 15   | 44    | 0.0127993 | 0.0066203 | 0.0194196 | 2266       | 3                             | 7                               | 10                              |
| LCA  | 2010 | country | 2_Amr   | Saint Lucia | 29   | 15   | 44    | 0.0129943 | 0.0067212 | 0.0197155 | 2232       | 4                             | 7                               | 10                              |
| LCA  | 2011 | country | 2_Amr   | Saint Lucia | 29   | 15   | 44    | 0.0127693 | 0.0066048 | 0.0193741 | 2271       | 2                             | 2                               | 4                               |
| LCA  | 2012 | country | 2_Amr   | Saint Lucia | 29   | 16   | 45    | 0.0129502 | 0.007145  | 0.0200952 | 2239       | 3                             | 5                               | 7                               |
| LCA  | 2013 | country | 2_Amr   | Saint Lucia | 29   | 16   | 45    | 0.0131147 | 0.0072357 | 0.0203504 | 2211       | 4                             | 2                               | 6                               |
| LCA  | 2014 | country | 2_Amr   | Saint Lucia | 28   | 18   | 46    | 0.012427  | 0.0079888 | 0.0204157 | 2253       | 6                             | 0                               | 6                               |
| LCA  | 2015 | country | 2_Amr   | Saint Lucia | 28   | 19   | 47    | 0.0125464 | 0.0085136 | 0.0210601 | 2232       | 4                             | 3                               | 7                               |
| LCA  | 2016 | country | 2_Amr   | Saint Lucia | 28   | 19   | 47    | 0.012635  | 0.0085738 | 0.0212088 | 2216       | 5                             | 3                               | 7                               |
| LCA  | 2017 | country | 2_Amr   | Saint Lucia | 28   | 20   | 48    | 0.0126989 | 0.0090707 | 0.0217696 | 2205       | 5                             | 3                               | 8                               |
| LCA  | 2018 | country | 2_Amr   | Saint Lucia | 28   | 20   | 48    | 0.0127121 | 0.0090801 | 0.0217922 | 2203       | 5                             | 3                               | 7                               |
| LCA  | 2019 | country | 2_Amr   | Saint Lucia | 28   | 20   | 48    | 0.0130843 | 0.0093459 | 0.0224302 | 2140       | 5                             | 3                               | 8                               |
| LKA  | 2000 | country | 3_Sear  | Sri Lanka   | 3329 | 2385 | 5714  | 0.0095715 | 0.0068574 | 0.0164289 | 347802     | 775                           | 577                             | 1351                            |
| LKA  | 2001 | country | 3_Sear  | Sri Lanka   | 2927 | 2639 | 5566  | 0.0083434 | 0.0075225 | 0.0158659 | 350815     | 689                           | 653                             | 1342                            |
| LKA  | 2002 | country | 3_Sear  | Sri Lanka   | 2537 | 2913 | 5450  | 0.0071656 | 0.0082276 | 0.0153932 | 354052     | 598                           | 735                             | 1333                            |
| LKA  | 2003 | country | 3_Sear  | Sri Lanka   | 2293 | 3056 | 5349  | 0.0064169 | 0.0085521 | 0.014969  | 357338     | 544                           | 785                             | 1329                            |
| LKA  | 2004 | country | 3_Sear  | Sri Lanka   | 2336 | 8004 | 10340 | 0.0064828 | 0.0222126 | 0.0286955 | 360336     | 536                           | 781                             | 1317                            |
| LKA  | 2005 | country | 3_Sear  | Sri Lanka   | 2332 | 2765 | 5097  | 0.0064291 | 0.0076229 | 0.014052  | 362724     | 559                           | 735                             | 1294                            |
| LKA  | 2006 | country | 3_Sear  | Sri Lanka   | 2464 | 2440 | 4904  | 0.0067632 | 0.0066974 | 0.0134606 | 364322     | 614                           | 662                             | 1276                            |
| LKA  | 2007 | country | 3_Sear  | Sri Lanka   | 2561 | 2125 | 4686  | 0.0070189 | 0.005824  | 0.0128429 | 364871     | 646                           | 589                             | 1235                            |
| LKA  | 2008 | country | 3_Sear  | Sri Lanka   | 2555 | 1941 | 4496  | 0.007008  | 0.0053239 | 0.0123319 | 364584     | 638                           | 548                             | 1186                            |
| LKA  | 2009 | country | 3_Sear  | Sri Lanka   | 2444 | 1905 | 4349  | 0.0067261 | 0.0052427 | 0.0119688 | 363362     | 617                           | 546                             | 1163                            |
| LKA  | 2010 | country | 3_Sear  | Sri Lanka   | 2305 | 1897 | 4202  | 0.0063795 | 0.0052503 | 0.0116297 | 361316     | 584                           | 559                             | 1143                            |
| LKA  | 2011 | country | 3_Sear  | Sri Lanka   | 2208 | 1809 | 4017  | 0.0061536 | 0.0050416 | 0.0111952 | 358814     | 560                           | 541                             | 1101                            |
| LKA  | 2012 | country | 3_Sear  | Sri Lanka   | 2141 | 1653 | 3794  | 0.0060153 | 0.0046442 | 0.0106595 | 355927     | 548                           | 504                             | 1052                            |
| LKA  | 2013 | country | 3_Sear  | Sri Lanka   | 2059 | 1486 | 3545  | 0.0058324 | 0.0042093 | 0.0100417 | 353030     | 529                           | 463                             | 992                             |
| LKA  | 2014 | country | 3_Sear  | Sri Lanka   | 1946 | 1344 | 3290  | 0.0055591 | 0.0038394 | 0.0093985 | 350058     | 497                           | 428                             | 926                             |
| LKA  | 2015 | country | 3_Sear  | Sri Lanka   | 1822 | 1229 | 3051  | 0.0052481 | 0.00354   | 0.0087882 | 347172     | 478                           | 400                             | 878                             |
| LKA  | 2016 | country | 3_Sear  | Sri Lanka   | 1705 | 1141 | 2846  | 0.0049571 | 0.0033173 | 0.0082744 | 343952     | 443                           | 379                             | 822                             |
| LKA  | 2017 | country | 3_Sear  | Sri Lanka   | 1601 | 1072 | 2673  | 0.0047068 | 0.0031516 | 0.0078584 | 340146     | 429                           | 362                             | 791                             |
| LKA  | 2018 | country | 3_Sear  | Sri Lanka   | 1505 | 1011 | 2516  | 0.0044787 | 0.0030086 | 0.0074874 | 336033     | 400                           | 347                             | 747                             |
| LKA  | 2019 | country | 3_Sear  | Sri Lanka   | 1416 | 962  | 2378  | 0.004273  | 0.002903  | 0.007176  | 331381     | 377                           | 334                             | 711                             |

| iso3 | year | level   | whoreg6 | whoname   | nnd  | pnd  | u5d  | nmr       | pnmr      | u5mr      | Livebirths | Neonatal birth defects deaths | 1-59 month birth defects deaths | Under five birth defects deaths |
|------|------|---------|---------|-----------|------|------|------|-----------|-----------|-----------|------------|-------------------------------|---------------------------------|---------------------------------|
| LSO  | 2000 | country | 1_Afr   | Lesotho   | 2291 | 4257 | 6548 | 0.0369382 | 0.0686406 | 0.1055787 | 62023      | 116                           | 48                              | 164                             |
| LSO  | 2001 | country | 1_Afr   | Lesotho   | 2312 | 4365 | 6677 | 0.0371325 | 0.0701009 | 0.1072335 | 62263      | 119                           | 44                              | 163                             |
| LSO  | 2002 | country | 1_Afr   | Lesotho   | 2324 | 4459 | 6783 | 0.0373037 | 0.0715754 | 0.1088791 | 62299      | 125                           | 53                              | 178                             |
| LSO  | 2003 | country | 1_Afr   | Lesotho   | 2324 | 4555 | 6879 | 0.0374219 | 0.0733418 | 0.1107637 | 62103      | 123                           | 64                              | 187                             |
| LSO  | 2004 | country | 1_Afr   | Lesotho   | 2321 | 4584 | 6905 | 0.0376051 | 0.0742697 | 0.1118748 | 61720      | 127                           | 62                              | 189                             |
| LSO  | 2005 | country | 1_Afr   | Lesotho   | 2314 | 4607 | 6921 | 0.0378521 | 0.0753559 | 0.1132081 | 61133      | 129                           | 60                              | 188                             |
| LSO  | 2006 | country | 1_Afr   | Lesotho   | 2309 | 4596 | 6905 | 0.0381754 | 0.0759817 | 0.1141571 | 60484      | 130                           | 58                              | 188                             |
| LSO  | 2007 | country | 1_Afr   | Lesotho   | 2313 | 4387 | 6700 | 0.0386857 | 0.0733677 | 0.1120534 | 59790      | 132                           | 59                              | 192                             |
| LSO  | 2008 | country | 1_Afr   | Lesotho   | 2324 | 4231 | 6555 | 0.0392828 | 0.0715094 | 0.1107922 | 59161      | 135                           | 59                              | 194                             |
| LSO  | 2009 | country | 1_Afr   | Lesotho   | 2338 | 3740 | 6078 | 0.0398901 | 0.0638141 | 0.1037042 | 58611      | 135                           | 75                              | 210                             |
| LSO  | 2010 | country | 1_Afr   | Lesotho   | 2358 | 3380 | 5738 | 0.0405043 | 0.0580665 | 0.0985708 | 58216      | 139                           | 93                              | 232                             |
| LSO  | 2011 | country | 1_Afr   | Lesotho   | 2381 | 3200 | 5581 | 0.0411103 | 0.0552575 | 0.0963679 | 57917      | 144                           | 105                             | 248                             |
| LSO  | 2012 | country | 1_Afr   | Lesotho   | 2407 | 3120 | 5527 | 0.0417026 | 0.0540537 | 0.0957563 | 57718      | 142                           | 100                             | 242                             |
| LSO  | 2013 | country | 1_Afr   | Lesotho   | 2435 | 3026 | 5461 | 0.0423123 | 0.0525782 | 0.0948905 | 57548      | 147                           | 95                              | 242                             |
| LSO  | 2014 | country | 1_Afr   | Lesotho   | 2463 | 2916 | 5379 | 0.0429142 | 0.0508119 | 0.0937262 | 57394      | 148                           | 92                              | 240                             |
| LSO  | 2015 | country | 1_Afr   | Lesotho   | 2484 | 2876 | 5360 | 0.0433968 | 0.0502483 | 0.0936451 | 57239      | 151                           | 90                              | 241                             |
| LSO  | 2016 | country | 1_Afr   | Lesotho   | 2492 | 2655 | 5147 | 0.0436842 | 0.0465339 | 0.0902181 | 57046      | 150                           | 107                             | 257                             |
| LSO  | 2017 | country | 1_Afr   | Lesotho   | 2479 | 2541 | 5020 | 0.0436422 | 0.0447342 | 0.0883764 | 56803      | 156                           | 110                             | 266                             |
| LSO  | 2018 | country | 1_Afr   | Lesotho   | 2452 | 2403 | 4855 | 0.0434219 | 0.04256   | 0.0859819 | 56469      | 151                           | 115                             | 266                             |
| LSO  | 2019 | country | 1_Afr   | Lesotho   | 2401 | 2428 | 4829 | 0.042808  | 0.0432869 | 0.0860948 | 56088      | 153                           | 111                             | 264                             |
| LTU  | 2000 | country | 4_Eur   | Lithuania | 151  | 224  | 375  | 0.0045352 | 0.0067277 | 0.0112629 | 33295      | 67                            | 70                              | 137                             |
| LTU  | 2001 | country | 4_Eur   | Lithuania | 141  | 203  | 344  | 0.0044077 | 0.0063459 | 0.0107536 | 31989      | 56                            | 73                              | 128                             |
| LTU  | 2002 | country | 4_Eur   | Lithuania | 135  | 183  | 318  | 0.0043233 | 0.0058605 | 0.0101838 | 31226      | 63                            | 55                              | 118                             |
| LTU  | 2003 | country | 4_Eur   | Lithuania | 132  | 167  | 299  | 0.0043    | 0.0054401 | 0.00974   | 30698      | 42                            | 52                              | 94                              |
| LTU  | 2004 | country | 4_Eur   | Lithuania | 131  | 156  | 287  | 0.0043057 | 0.0051274 | 0.0094332 | 30425      | 51                            | 53                              | 104                             |
| LTU  | 2005 | country | 4_Eur   | Lithuania | 129  | 148  | 277  | 0.0042472 | 0.0048727 | 0.0091199 | 30373      | 41                            | 48                              | 89                              |
| LTU  | 2006 | country | 4_Eur   | Lithuania | 123  | 140  | 263  | 0.004029  | 0.0045859 | 0.0086149 | 30529      | 56                            | 43                              | 99                              |
| LTU  | 2007 | country | 4_Eur   | Lithuania | 113  | 133  | 246  | 0.0036515 | 0.0042977 | 0.0079492 | 30947      | 39                            | 50                              | 89                              |
| LTU  | 2008 | country | 4_Eur   | Lithuania | 104  | 123  | 227  | 0.003338  | 0.0039479 | 0.0072859 | 31156      | 37                            | 43                              | 80                              |
| LTU  | 2009 | country | 4_Eur   | Lithuania | 97   | 111  | 208  | 0.0030817 | 0.0035265 | 0.0066081 | 31476      | 30                            | 34                              | 64                              |
| LTU  | 2010 | country | 4_Eur   | Lithuania | 91   | 100  | 191  | 0.0028804 | 0.0031653 | 0.0060456 | 31593      | 32                            | 31                              | 63                              |
| LTU  | 2011 | country | 4_Eur   | Lithuania | 85   | 90   | 175  | 0.0026668 | 0.0028237 | 0.0054905 | 31873      | 26                            | 33                              | 59                              |
| LTU  | 2012 | country | 4_Eur   | Lithuania | 80   | 84   | 164  | 0.0025323 | 0.0026589 | 0.0051913 | 31592      | 24                            | 23                              | 47                              |
| LTU  | 2013 | country | 4_Eur   | Lithuania | 76   | 81   | 157  | 0.0024077 | 0.0025661 | 0.0049739 | 31565      | 27                            | 29                              | 56                              |
| LTU  | 2014 | country | 4_Eur   | Lithuania | 74   | 81   | 155  | 0.0023766 | 0.0026015 | 0.0049781 | 31136      | 34                            | 35                              | 69                              |
| LTU  | 2015 | country | 4_Eur   | Lithuania | 71   | 82   | 153  | 0.0023245 | 0.0026847 | 0.0050092 | 30544      | 28                            | 32                              | 60                              |
| LTU  | 2016 | country | 4_Eur   | Lithuania | 69   | 76   | 145  | 0.0022989 | 0.0025321 | 0.004831  | 30015      | 30                            | 26                              | 56                              |
| LTU  | 2017 | country | 4_Eur   | Lithuania | 66   | 66   | 132  | 0.0022156 | 0.0022156 | 0.0044312 | 29789      | 26                            | 18                              | 43                              |
| LTU  | 2018 | country | 4_Eur   | Lithuania | 62   | 57   | 119  | 0.0021413 | 0.0019686 | 0.0041099 | 28955      | 25                            | 19                              | 44                              |
| LTU  | 2019 | country | 4_Eur   | Lithuania | 58   | 48   | 106  | 0.0020479 | 0.0016948 | 0.0037428 | 28321      | 24                            | 16                              | 40                              |

| iso3 | year | level   | whoreg6 | whoname    | nnd | pnd | u5d | nmr       | pnmr      | u5mr      | Livebirths | Neonatal birth defects deaths | 1-59 month birth defects deaths | Under five birth defects deaths |
|------|------|---------|---------|------------|-----|-----|-----|-----------|-----------|-----------|------------|-------------------------------|---------------------------------|---------------------------------|
| LUX  | 2000 | country | 4_Eur   | Luxembourg | 13  | 12  | 25  | 0.0024298 | 0.0022429 | 0.0046726 | 5350       | 3                             | 0                               | 3                               |
| LUX  | 2001 | country | 4_Eur   | Luxembourg | 12  | 12  | 24  | 0.002315  | 0.002315  | 0.0046301 | 5183       | 2                             | 2                               | 3                               |
| LUX  | 2002 | country | 4_Eur   | Luxembourg | 12  | 11  | 23  | 0.0022075 | 0.0020235 | 0.004231  | 5436       | 2                             | 2                               | 3                               |
| LUX  | 2003 | country | 4_Eur   | Luxembourg | 11  | 10  | 21  | 0.0020985 | 0.0019078 | 0.0040063 | 5242       | 2                             | 0                               | 2                               |
| LUX  | 2004 | country | 4_Eur   | Luxembourg | 10  | 10  | 20  | 0.0018094 | 0.0018094 | 0.0036187 | 5527       | 2                             | 2                               | 4                               |
| LUX  | 2005 | country | 4_Eur   | Luxembourg | 10  | 9   | 19  | 0.0018881 | 0.0016993 | 0.0035873 | 5296       | 1                             | 3                               | 4                               |
| LUX  | 2006 | country | 4_Eur   | Luxembourg | 10  | 9   | 19  | 0.0017915 | 0.0016124 | 0.0034039 | 5582       | 0                             | 3                               | 3                               |
| LUX  | 2007 | country | 4_Eur   | Luxembourg | 9   | 9   | 18  | 0.0017083 | 0.0017083 | 0.0034165 | 5268       | 3                             | 2                               | 5                               |
| LUX  | 2008 | country | 4_Eur   | Luxembourg | 9   | 8   | 17  | 0.001639  | 0.0014569 | 0.0030958 | 5491       | 0                             | 0                               | 0                               |
| LUX  | 2009 | country | 4_Eur   | Luxembourg | 9   | 8   | 17  | 0.0015852 | 0.001409  | 0.0029942 | 5678       | 2                             | 0                               | 2                               |
| LUX  | 2010 | country | 4_Eur   | Luxembourg | 9   | 8   | 17  | 0.0015443 | 0.0013727 | 0.002917  | 5828       | 2                             | 3                               | 4                               |
| LUX  | 2011 | country | 4_Eur   | Luxembourg | 9   | 8   | 17  | 0.0015129 | 0.0013448 | 0.0028577 | 5949       | 2                             | 0                               | 2                               |
| LUX  | 2012 | country | 4_Eur   | Luxembourg | 9   | 8   | 17  | 0.0014884 | 0.001323  | 0.0028114 | 6047       | 0                             | 3                               | 3                               |
| LUX  | 2013 | country | 4_Eur   | Luxembourg | 9   | 8   | 17  | 0.0014658 | 0.001303  | 0.0027688 | 6140       | 2                             | 3                               | 5                               |
| LUX  | 2014 | country | 4_Eur   | Luxembourg | 9   | 8   | 17  | 0.0014431 | 0.0012828 | 0.0027259 | 6237       | 0                             | 0                               | 0                               |
| LUX  | 2015 | country | 4_Eur   | Luxembourg | 9   | 9   | 18  | 0.0014146 | 0.0014146 | 0.0028293 | 6362       | 4                             | 3                               | 7                               |
| LUX  | 2016 | country | 4_Eur   | Luxembourg | 10  | 8   | 18  | 0.0015338 | 0.001227  | 0.0027608 | 6520       | 4                             | 0                               | 4                               |
| LUX  | 2017 | country | 4_Eur   | Luxembourg | 10  | 8   | 18  | 0.0014944 | 0.0011955 | 0.0026899 | 6692       | 3                             | 1                               | 3                               |
| LUX  | 2018 | country | 4_Eur   | Luxembourg | 10  | 8   | 18  | 0.0016319 | 0.0013055 | 0.0029374 | 6128       | 4                             | 1                               | 4                               |
| LUX  | 2019 | country | 4_Eur   | Luxembourg | 9   | 9   | 18  | 0.001426  | 0.001426  | 0.002852  | 6311       | 3                             | 1                               | 4                               |
| LVA  | 2000 | country | 4_Eur   | Latvia     | 138 | 140 | 278 | 0.0071585 | 0.0072623 | 0.0144208 | 19278      | 42                            | 55                              | 97                              |
| LVA  | 2001 | country | 4_Eur   | Latvia     | 130 | 130 | 260 | 0.0066193 | 0.0066193 | 0.0132386 | 19640      | 51                            | 35                              | 86                              |
| LVA  | 2002 | country | 4_Eur   | Latvia     | 125 | 124 | 249 | 0.0061812 | 0.0061318 | 0.012313  | 20223      | 38                            | 37                              | 75                              |
| LVA  | 2003 | country | 4_Eur   | Latvia     | 122 | 120 | 242 | 0.0058328 | 0.0057371 | 0.0115699 | 20916      | 37                            | 36                              | 73                              |
| LVA  | 2004 | country | 4_Eur   | Latvia     | 120 | 114 | 234 | 0.0055702 | 0.0052917 | 0.0108618 | 21543      | 29                            | 39                              | 68                              |
| LVA  | 2005 | country | 4_Eur   | Latvia     | 118 | 107 | 225 | 0.0053725 | 0.0048717 | 0.0102443 | 21964      | 32                            | 23                              | 55                              |
| LVA  | 2006 | country | 4_Eur   | Latvia     | 116 | 100 | 216 | 0.0051917 | 0.0044756 | 0.0096674 | 22343      | 30                            | 28                              | 58                              |
| LVA  | 2007 | country | 4_Eur   | Latvia     | 113 | 94  | 207 | 0.0050043 | 0.0041628 | 0.0091671 | 22581      | 30                            | 36                              | 67                              |
| LVA  | 2008 | country | 4_Eur   | Latvia     | 108 | 90  | 198 | 0.0047934 | 0.0039945 | 0.0087879 | 22531      | 29                            | 36                              | 64                              |
| LVA  | 2009 | country | 4_Eur   | Latvia     | 101 | 86  | 187 | 0.0045253 | 0.0038532 | 0.0083785 | 22319      | 30                            | 37                              | 67                              |
| LVA  | 2010 | country | 4_Eur   | Latvia     | 93  | 81  | 174 | 0.0042114 | 0.003668  | 0.0078795 | 22083      | 19                            | 24                              | 43                              |
| LVA  | 2011 | country | 4_Eur   | Latvia     | 84  | 75  | 159 | 0.0038698 | 0.0034552 | 0.0073251 | 21706      | 19                            | 28                              | 47                              |
| LVA  | 2012 | country | 4_Eur   | Latvia     | 75  | 69  | 144 | 0.0035213 | 0.0032396 | 0.0067608 | 21299      | 16                            | 23                              | 39                              |
| LVA  | 2013 | country | 4_Eur   | Latvia     | 67  | 62  | 129 | 0.0031787 | 0.0029415 | 0.0061202 | 21078      | 14                            | 14                              | 28                              |
| LVA  | 2014 | country | 4_Eur   | Latvia     | 60  | 56  | 116 | 0.0028676 | 0.0026765 | 0.0055441 | 20923      | 17                            | 12                              | 28                              |
| LVA  | 2015 | country | 4_Eur   | Latvia     | 54  | 51  | 105 | 0.0025929 | 0.0024489 | 0.0050418 | 20826      | 13                            | 18                              | 31                              |
| LVA  | 2016 | country | 4_Eur   | Latvia     | 49  | 46  | 95  | 0.0023561 | 0.0022118 | 0.0045679 | 20797      | 12                            | 12                              | 24                              |
| LVA  | 2017 | country | 4_Eur   | Latvia     | 45  | 42  | 87  | 0.0021546 | 0.0020109 | 0.0041655 | 20886      | 11                            | 11                              | 22                              |
| LVA  | 2018 | country | 4_Eur   | Latvia     | 41  | 39  | 80  | 0.0019889 | 0.0018919 | 0.0038809 | 20614      | 10                            | 10                              | 20                              |
| LVA  | 2019 | country | 4_Eur   | Latvia     | 37  | 37  | 74  | 0.0018544 | 0.0018544 | 0.0037089 | 19952      | 9                             | 10                              | 19                              |

| iso3 | year | level   | whoreg6 | whoname | nnd   | pnd   | u5d   | nmr       | pnmr      | u5mr      | Livebirths | Neonatal birth defects deaths | 1-59 month birth defects deaths | Under five birth defects deaths |
|------|------|---------|---------|---------|-------|-------|-------|-----------|-----------|-----------|------------|-------------------------------|---------------------------------|---------------------------------|
| MAR  | 2000 | country | 5_Emr   | Morocco | 17206 | 14401 | 31607 | 0.0268669 | 0.0224869 | 0.0493538 | 640416     | 1122                          | 2527                            | 3650                            |
| MAR  | 2001 | country | 5_Emr   | Morocco | 16692 | 13412 | 30104 | 0.026093  | 0.0209657 | 0.0470587 | 639712     | 1117                          | 1809                            | 2926                            |
| MAR  | 2002 | country | 5_Emr   | Morocco | 16256 | 12505 | 28761 | 0.0253877 | 0.0195296 | 0.0449173 | 640311     | 1133                          | 1652                            | 2785                            |
| MAR  | 2003 | country | 5_Emr   | Morocco | 15851 | 11707 | 27558 | 0.0247032 | 0.0182449 | 0.0429481 | 641658     | 1132                          | 1446                            | 2578                            |
| MAR  | 2004 | country | 5_Emr   | Morocco | 15469 | 10961 | 26430 | 0.0240347 | 0.0170305 | 0.0410652 | 643610     | 1121                          | 1534                            | 2655                            |
| MAR  | 2005 | country | 5_Emr   | Morocco | 15110 | 10271 | 25381 | 0.0233673 | 0.0158839 | 0.0392512 | 646630     | 1134                          | 1536                            | 2669                            |
| MAR  | 2006 | country | 5_Emr   | Morocco | 14788 | 9646  | 24434 | 0.0227022 | 0.0148083 | 0.0375104 | 651392     | 1108                          | 1438                            | 2545                            |
| MAR  | 2007 | country | 5_Emr   | Morocco | 14510 | 9090  | 23600 | 0.0220413 | 0.0138081 | 0.0358494 | 658309     | 1141                          | 1414                            | 2556                            |
| MAR  | 2008 | country | 5_Emr   | Morocco | 14264 | 8563  | 22827 | 0.0213781 | 0.0128338 | 0.0342118 | 667225     | 1142                          | 1406                            | 2548                            |
| MAR  | 2009 | country | 5_Emr   | Morocco | 14013 | 8130  | 22143 | 0.020684  | 0.0120004 | 0.0326844 | 677479     | 1147                          | 1368                            | 2514                            |
| MAR  | 2010 | country | 5_Emr   | Morocco | 13741 | 7753  | 21494 | 0.0199751 | 0.0112705 | 0.0312456 | 687905     | 1164                          | 1296                            | 2459                            |
| MAR  | 2011 | country | 5_Emr   | Morocco | 13418 | 7434  | 20852 | 0.0192515 | 0.0106659 | 0.0299174 | 696986     | 1307                          | 1305                            | 2612                            |
| MAR  | 2012 | country | 5_Emr   | Morocco | 13047 | 7111  | 20158 | 0.0185427 | 0.0101063 | 0.028649  | 703621     | 1392                          | 1295                            | 2686                            |
| MAR  | 2013 | country | 5_Emr   | Morocco | 12508 | 6886  | 19394 | 0.0176946 | 0.0097413 | 0.0274359 | 706884     | 1462                          | 1287                            | 2749                            |
| MAR  | 2014 | country | 5_Emr   | Morocco | 11933 | 6658  | 18591 | 0.0168879 | 0.0094226 | 0.0263105 | 706600     | 1563                          | 1293                            | 2856                            |
| MAR  | 2015 | country | 5_Emr   | Morocco | 11338 | 6394  | 17732 | 0.0161278 | 0.0090952 | 0.0252229 | 703012     | 1613                          | 1300                            | 2912                            |
| MAR  | 2016 | country | 5_Emr   | Morocco | 10721 | 6141  | 16862 | 0.0153853 | 0.0088127 | 0.0241981 | 696832     | 1647                          | 1316                            | 2963                            |
| MAR  | 2017 | country | 5_Emr   | Morocco | 10161 | 5865  | 16026 | 0.014738  | 0.0085069 | 0.0232448 | 689444     | 1683                          | 1319                            | 3002                            |
| MAR  | 2018 | country | 5_Emr   | Morocco | 9660  | 5587  | 15247 | 0.0141682 | 0.0081944 | 0.0223626 | 681808     | 1662                          | 1313                            | 2975                            |
| MAR  | 2019 | country | 5_Emr   | Morocco | 9187  | 5324  | 14511 | 0.013619  | 0.0078924 | 0.0215114 | 674573     | 1644                          | 1303                            | 2947                            |
| MCO  | 2000 | country | 4_Eur   | Monaco  | 1     | 1     | 2     | 0.0028671 | 0.0028671 | 0.0057342 | 349        | 0                             | 0                               | 0                               |
| MCO  | 2001 | country | 4_Eur   | Monaco  | 1     | 1     | 2     | 0.0027752 | 0.0027752 | 0.0055504 | 360        | 0                             | 0                               | 0                               |
| MCO  | 2002 | country | 4_Eur   | Monaco  | 1     | 1     | 2     | 0.0026942 | 0.0026942 | 0.0053884 | 371        | 0                             | 0                               | 0                               |
| MCO  | 2003 | country | 4_Eur   | Monaco  | 1     | 1     | 2     | 0.0026212 | 0.0026212 | 0.0052424 | 382        | 0                             | 0                               | 0                               |
| MCO  | 2004 | country | 4_Eur   | Monaco  | 1     | 1     | 2     | 0.0025497 | 0.0025497 | 0.0050994 | 392        | 0                             | 0                               | 0                               |
| MCO  | 2005 | country | 4_Eur   | Monaco  | 1     | 1     | 2     | 0.002488  | 0.002488  | 0.0049759 | 402        | 0                             | 0                               | 0                               |
| MCO  | 2006 | country | 4_Eur   | Monaco  | 1     | 1     | 2     | 0.0024304 | 0.0024304 | 0.0048609 | 411        | 0                             | 0                               | 0                               |
| MCO  | 2007 | country | 4_Eur   | Monaco  | 1     | 1     | 2     | 0.0023779 | 0.0023779 | 0.0047558 | 421        | 0                             | 0                               | 0                               |
| MCO  | 2008 | country | 4_Eur   | Monaco  | 1     | 1     | 2     | 0.0023238 | 0.0023238 | 0.0046476 | 430        | 0                             | 0                               | 0                               |
| MCO  | 2009 | country | 4_Eur   | Monaco  | 1     | 1     | 2     | 0.0022738 | 0.0022738 | 0.0045476 | 440        | 0                             | 0                               | 0                               |
| MCO  | 2010 | country | 4_Eur   | Monaco  | 1     | 1     | 2     | 0.0022242 | 0.0022242 | 0.0044484 | 450        | 0                             | 0                               | 0                               |
| MCO  | 2011 | country | 4_Eur   | Monaco  | 1     | 1     | 2     | 0.0021712 | 0.0021712 | 0.0043425 | 461        | 0                             | 0                               | 0                               |
| MCO  | 2012 | country | 4_Eur   | Monaco  | 1     | 1     | 2     | 0.0021194 | 0.0021194 | 0.0042389 | 472        | 0                             | 0                               | 0                               |
| MCO  | 2013 | country | 4_Eur   | Monaco  | 1     | 1     | 2     | 0.0020656 | 0.0020656 | 0.0041313 | 484        | 0                             | 0                               | 0                               |
| MCO  | 2014 | country | 4_Eur   | Monaco  | 1     | 1     | 2     | 0.0020081 | 0.0020081 | 0.0040163 | 498        | 0                             | 0                               | 0                               |
| MCO  | 2015 | country | 4_Eur   | Monaco  | 1     | 1     | 2     | 0.0019452 | 0.0019452 | 0.0038905 | 514        | 0                             | 0                               | 0                               |
| MCO  | 2016 | country | 4_Eur   | Monaco  | 1     | 1     | 2     | 0.0018853 | 0.0018853 | 0.0037707 | 530        | 0                             | 0                               | 0                               |
| MCO  | 2017 | country | 4_Eur   | Monaco  | 1     | 1     | 2     | 0.0018197 | 0.0018197 | 0.0036394 | 550        | 0                             | 0                               | 0                               |
| MCO  | 2018 | country | 4_Eur   | Monaco  | 1     | 1     | 2     | 0.0017585 | 0.0017585 | 0.0035171 | 569        | 0                             | 0                               | 0                               |
| MCO  | 2019 | country | 4_Eur   | Monaco  | 1     | 1     | 2     | 0.0016977 | 0.0016977 | 0.0033953 | 589        | 0                             | 0                               | 0                               |

| iso3 | year | level   | whoreg6 | whoname             | nnd   | pnd   | u5d   | nmr       | pnmr      | u5mr      | Livebirths | Neonatal birth defects deaths | 1-59 month birth defects deaths | Under five birth defects deaths |
|------|------|---------|---------|---------------------|-------|-------|-------|-----------|-----------|-----------|------------|-------------------------------|---------------------------------|---------------------------------|
| MDA  | 2000 | country | 4_Eur   | Republic of Moldova | 991   | 576   | 1567  | 0.0207253 | 0.0120462 | 0.0327715 | 47816      | 302                           | 95                              | 398                             |
| MDA  | 2001 | country | 4_Eur   | Republic of Moldova | 874   | 472   | 1346  | 0.0191496 | 0.0103417 | 0.0294913 | 45641      | 285                           | 105                             | 390                             |
| MDA  | 2002 | country | 4_Eur   | Republic of Moldova | 761   | 397   | 1158  | 0.0172821 | 0.0090158 | 0.0262979 | 44034      | 288                           | 93                              | 381                             |
| MDA  | 2003 | country | 4_Eur   | Republic of Moldova | 678   | 334   | 1012  | 0.015761  | 0.0077643 | 0.0235253 | 43018      | 202                           | 72                              | 274                             |
| MDA  | 2004 | country | 4_Eur   | Republic of Moldova | 623   | 287   | 910   | 0.0145914 | 0.0067219 | 0.0213133 | 42696      | 229                           | 70                              | 299                             |
| MDA  | 2005 | country | 4_Eur   | Republic of Moldova | 592   | 252   | 844   | 0.0138001 | 0.0058744 | 0.0196744 | 42898      | 204                           | 56                              | 260                             |
| MDA  | 2006 | country | 4_Eur   | Republic of Moldova | 578   | 229   | 807   | 0.0133228 | 0.0052784 | 0.0186011 | 43384      | 212                           | 53                              | 265                             |
| MDA  | 2007 | country | 4_Eur   | Republic of Moldova | 576   | 214   | 790   | 0.0130457 | 0.0048468 | 0.0178925 | 44152      | 166                           | 47                              | 213                             |
| MDA  | 2008 | country | 4_Eur   | Republic of Moldova | 577   | 203   | 780   | 0.0129059 | 0.0045406 | 0.0174465 | 44708      | 210                           | 53                              | 263                             |
| MDA  | 2009 | country | 4_Eur   | Republic of Moldova | 577   | 197   | 774   | 0.0127823 | 0.0043642 | 0.0171465 | 45140      | 176                           | 44                              | 220                             |
| MDA  | 2010 | country | 4_Eur   | Republic of Moldova | 574   | 194   | 768   | 0.0126762 | 0.0042843 | 0.0169605 | 45282      | 176                           | 55                              | 230                             |
| MDA  | 2011 | country | 4_Eur   | Republic of Moldova | 565   | 192   | 757   | 0.0125094 | 0.004251  | 0.0167604 | 45166      | 167                           | 46                              | 214                             |
| MDA  | 2012 | country | 4_Eur   | Republic of Moldova | 551   | 190   | 741   | 0.0122771 | 0.0042335 | 0.0165106 | 44880      | 220                           | 60                              | 280                             |
| MDA  | 2013 | country | 4_Eur   | Republic of Moldova | 535   | 187   | 722   | 0.0120627 | 0.0042163 | 0.016279  | 44352      | 167                           | 42                              | 208                             |
| MDA  | 2014 | country | 4_Eur   | Republic of Moldova | 518   | 184   | 702   | 0.0118324 | 0.004203  | 0.0160353 | 43778      | 174                           | 49                              | 223                             |
| MDA  | 2015 | country | 4_Eur   | Republic of Moldova | 501   | 179   | 680   | 0.0116036 | 0.0041458 | 0.0157494 | 43176      | 130                           | 48                              | 178                             |
| MDA  | 2016 | country | 4_Eur   | Republic of Moldova | 483   | 172   | 655   | 0.0113784 | 0.0040519 | 0.0154303 | 42449      | 143                           | 40                              | 183                             |
| MDA  | 2017 | country | 4_Eur   | Republic of Moldova | 464   | 168   | 632   | 0.0111368 | 0.0040323 | 0.0151691 | 41664      | 168                           | 46                              | 215                             |
| MDA  | 2018 | country | 4_Eur   | Republic of Moldova | 445   | 163   | 608   | 0.0108813 | 0.0039857 | 0.014867  | 40896      | 136                           | 42                              | 179                             |
| MDA  | 2019 | country | 4_Eur   | Republic of Moldova | 428   | 156   | 584   | 0.0106682 | 0.0038884 | 0.0145566 | 40119      | 138                           | 40                              | 178                             |
| MDG  | 2000 | country | 1_Afr   | Madagascar          | 20116 | 48180 | 68296 | 0.0309029 | 0.0740161 | 0.104919  | 650942     | 1025                          | 407                             | 1433                            |
| MDG  | 2001 | country | 1_Afr   | Madagascar          | 19828 | 47342 | 67170 | 0.030037  | 0.0717179 | 0.1017549 | 660118     | 1035                          | 441                             | 1476                            |
| MDG  | 2002 | country | 1_Afr   | Madagascar          | 19557 | 46237 | 65794 | 0.0292349 | 0.0691181 | 0.098353  | 668961     | 1020                          | 487                             | 1506                            |
| MDG  | 2003 | country | 1_Afr   | Madagascar          | 19310 | 43479 | 62789 | 0.0284891 | 0.0641468 | 0.0926358 | 677804     | 1011                          | 550                             | 1561                            |
| MDG  | 2004 | country | 1_Afr   | Madagascar          | 19069 | 40180 | 59249 | 0.0277643 | 0.058502  | 0.0862663 | 686817     | 989                           | 804                             | 1793                            |
| MDG  | 2005 | country | 1_Afr   | Madagascar          | 18834 | 36834 | 55668 | 0.0270574 | 0.052917  | 0.0799744 | 696076     | 1006                          | 728                             | 1734                            |
| MDG  | 2006 | country | 1_Afr   | Madagascar          | 18618 | 35745 | 54363 | 0.0263891 | 0.0506644 | 0.0770536 | 705518     | 991                           | 704                             | 1695                            |
| MDG  | 2007 | country | 1_Afr   | Madagascar          | 18426 | 34618 | 53044 | 0.0257666 | 0.0484092 | 0.0741758 | 715112     | 988                           | 976                             | 1964                            |
| MDG  | 2008 | country | 1_Afr   | Madagascar          | 18236 | 33126 | 51362 | 0.0251603 | 0.045704  | 0.0708642 | 724793     | 980                           | 831                             | 1811                            |
| MDG  | 2009 | country | 1_Afr   | Madagascar          | 18058 | 32443 | 50501 | 0.0245791 | 0.0441592 | 0.0687384 | 734688     | 982                           | 734                             | 1716                            |
| MDG  | 2010 | country | 1_Afr   | Madagascar          | 17910 | 31730 | 49640 | 0.0240366 | 0.0425842 | 0.0666208 | 745113     | 980                           | 808                             | 1788                            |
| MDG  | 2011 | country | 1_Afr   | Madagascar          | 17811 | 30315 | 48126 | 0.0235503 | 0.0400828 | 0.0636331 | 756298     | 971                           | 748                             | 1719                            |
| MDG  | 2012 | country | 1_Afr   | Madagascar          | 17763 | 29932 | 47695 | 0.023116  | 0.0389525 | 0.0620685 | 768428     | 965                           | 717                             | 1683                            |
| MDG  | 2013 | country | 1_Afr   | Madagascar          | 17727 | 29505 | 47232 | 0.0226819 | 0.037752  | 0.0604339 | 781549     | 982                           | 826                             | 1808                            |
| MDG  | 2014 | country | 1_Afr   | Madagascar          | 17700 | 28249 | 45949 | 0.0222456 | 0.0355042 | 0.0577498 | 795662     | 966                           | 875                             | 1841                            |
| MDG  | 2015 | country | 1_Afr   | Madagascar          | 17678 | 28185 | 45863 | 0.0218076 | 0.0347691 | 0.0565768 | 810633     | 997                           | 734                             | 1731                            |
| MDG  | 2016 | country | 1_Afr   | Madagascar          | 17677 | 27884 | 45561 | 0.0213899 | 0.0337404 | 0.0551303 | 826418     | 979                           | 797                             | 1776                            |
| MDG  | 2017 | country | 1_Afr   | Madagascar          | 17665 | 26532 | 44197 | 0.0209658 | 0.0314893 | 0.0524551 | 842565     | 984                           | 796                             | 1780                            |
| MDG  | 2018 | country | 1_Afr   | Madagascar          | 17644 | 26615 | 44259 | 0.0205432 | 0.030988  | 0.0515313 | 858872     | 987                           | 816                             | 1804                            |
| MDG  | 2019 | country | 1_Afr   | Madagascar          | 17607 | 38060 | 55667 | 0.0201197 | 0.043491  | 0.0636107 | 875113     | 973                           | 812                             | 1785                            |

| iso3 | year | level   | whoreg6 | whoname  | nnd   | pnd   | u5d   | nmr       | pnmr      | u5mr      | Livebirths | Neonatal birth defects deaths | 1-59 month birth defects deaths | Under five birth defects deaths |
|------|------|---------|---------|----------|-------|-------|-------|-----------|-----------|-----------|------------|-------------------------------|---------------------------------|---------------------------------|
| MDV  | 2000 | country | 3_Sear  | Maldives | 132   | 111   | 243   | 0.0218216 | 0.0183499 | 0.0401715 | 6049       | 13                            | 14                              | 26                              |
| MDV  | 2001 | country | 3_Sear  | Maldives | 115   | 93    | 208   | 0.0194557 | 0.0157338 | 0.0351895 | 5911       | 12                            | 12                              | 24                              |
| MDV  | 2002 | country | 3_Sear  | Maldives | 103   | 99    | 202   | 0.0175468 | 0.0168433 | 0.0343902 | 5870       | 12                            | 10                              | 23                              |
| MDV  | 2003 | country | 3_Sear  | Maldives | 91    | 69    | 160   | 0.0153581 | 0.01171   | 0.0270681 | 5925       | 13                            | 10                              | 22                              |
| MDV  | 2004 | country | 3_Sear  | Maldives | 82    | 79    | 161   | 0.0136241 | 0.0130485 | 0.0266726 | 6019       | 13                            | 10                              | 23                              |
| MDV  | 2005 | country | 3_Sear  | Maldives | 75    | 57    | 132   | 0.0120527 | 0.0091365 | 0.0211892 | 6223       | 13                            | 10                              | 23                              |
| MDV  | 2006 | country | 3_Sear  | Maldives | 70    | 52    | 122   | 0.0109018 | 0.0080272 | 0.018929  | 6421       | 14                            | 10                              | 24                              |
| MDV  | 2007 | country | 3_Sear  | Maldives | 66    | 48    | 114   | 0.0098345 | 0.0071934 | 0.0170279 | 6711       | 14                            | 10                              | 24                              |
| MDV  | 2008 | country | 3_Sear  | Maldives | 63    | 45    | 108   | 0.0090933 | 0.0064952 | 0.0155884 | 6928       | 14                            | 10                              | 24                              |
| MDV  | 2009 | country | 3_Sear  | Maldives | 59    | 44    | 103   | 0.0082195 | 0.0061298 | 0.0143492 | 7178       | 13                            | 11                              | 24                              |
| MDV  | 2010 | country | 3_Sear  | Maldives | 56    | 43    | 99    | 0.0075981 | 0.0058343 | 0.0134324 | 7370       | 12                            | 11                              | 23                              |
| MDV  | 2011 | country | 3_Sear  | Maldives | 52    | 43    | 95    | 0.0069496 | 0.0057467 | 0.0126963 | 7482       | 12                            | 11                              | 23                              |
| MDV  | 2012 | country | 3_Sear  | Maldives | 49    | 42    | 91    | 0.0065263 | 0.005594  | 0.0121202 | 7508       | 11                            | 12                              | 23                              |
| MDV  | 2013 | country | 3_Sear  | Maldives | 47    | 39    | 86    | 0.0063031 | 0.0052302 | 0.0115333 | 7457       | 11                            | 11                              | 22                              |
| MDV  | 2014 | country | 3_Sear  | Maldives | 45    | 36    | 81    | 0.0060122 | 0.0048098 | 0.010822  | 7485       | 10                            | 11                              | 21                              |
| MDV  | 2015 | country | 3_Sear  | Maldives | 44    | 32    | 76    | 0.0059051 | 0.0042946 | 0.0101998 | 7451       | 11                            | 10                              | 20                              |
| MDV  | 2016 | country | 3_Sear  | Maldives | 42    | 28    | 70    | 0.0056913 | 0.0037942 | 0.0094855 | 7380       | 10                            | 9                               | 19                              |
| MDV  | 2017 | country | 3_Sear  | Maldives | 40    | 25    | 65    | 0.0054935 | 0.0034335 | 0.008927  | 7281       | 10                            | 8                               | 18                              |
| MDV  | 2018 | country | 3_Sear  | Maldives | 38    | 21    | 59    | 0.005294  | 0.0029256 | 0.0082196 | 7178       | 9                             | 7                               | 16                              |
| MDV  | 2019 | country | 3_Sear  | Maldives | 34    | 20    | 54    | 0.0048146 | 0.0028321 | 0.0076467 | 7062       | 9                             | 7                               | 15                              |
| MEX  | 2000 | country | 2_Amr   | Mexico   | 33505 | 32963 | 66468 | 0.0142022 | 0.0139725 | 0.0281747 | 2359138    | 6572                          | 6320                            | 12892                           |
| MEX  | 2001 | country | 2_Amr   | Mexico   | 31036 | 32319 | 63355 | 0.0131999 | 0.0137456 | 0.0269455 | 2351228    | 6198                          | 6311                            | 12509                           |
| MEX  | 2002 | country | 2_Amr   | Mexico   | 28605 | 31799 | 60404 | 0.012214  | 0.0135778 | 0.0257919 | 2341977    | 5713                          | 5908                            | 11621                           |
| MEX  | 2003 | country | 2_Amr   | Mexico   | 26320 | 31331 | 57651 | 0.0112886 | 0.0134378 | 0.0247264 | 2331557    | 5428                          | 6181                            | 11609                           |
| MEX  | 2004 | country | 2_Amr   | Mexico   | 24265 | 30793 | 55058 | 0.010458  | 0.0132715 | 0.0237295 | 2320232    | 5107                          | 6316                            | 11423                           |
| MEX  | 2005 | country | 2_Amr   | Mexico   | 22632 | 30063 | 52695 | 0.009801  | 0.013019  | 0.02282   | 2309160    | 4994                          | 6311                            | 11305                           |
| MEX  | 2006 | country | 2_Amr   | Mexico   | 21593 | 28954 | 50547 | 0.0093895 | 0.0125904 | 0.02198   | 2299686    | 5129                          | 6304                            | 11433                           |
| MEX  | 2007 | country | 2_Amr   | Mexico   | 21137 | 27457 | 48594 | 0.0092188 | 0.0119753 | 0.0211941 | 2292805    | 4973                          | 5915                            | 10888                           |
| MEX  | 2008 | country | 2_Amr   | Mexico   | 20965 | 25856 | 46821 | 0.009161  | 0.0112981 | 0.0204591 | 2288516    | 5030                          | 5831                            | 10861                           |
| MEX  | 2009 | country | 2_Amr   | Mexico   | 20818 | 24365 | 45183 | 0.0091034 | 0.0106545 | 0.0197579 | 2286831    | 5011                          | 5622                            | 10633                           |
| MEX  | 2010 | country | 2_Amr   | Mexico   | 20569 | 23083 | 43652 | 0.0089954 | 0.0100948 | 0.0190902 | 2286619    | 4989                          | 5711                            | 10701                           |
| MEX  | 2011 | country | 2_Amr   | Mexico   | 20199 | 22001 | 42200 | 0.0088342 | 0.0096223 | 0.0184565 | 2286460    | 4984                          | 5493                            | 10477                           |
| MEX  | 2012 | country | 2_Amr   | Mexico   | 19723 | 21055 | 40778 | 0.0086322 | 0.0092151 | 0.0178473 | 2284830    | 4973                          | 5492                            | 10465                           |
| MEX  | 2013 | country | 2_Amr   | Mexico   | 19260 | 20148 | 39408 | 0.008446  | 0.0088354 | 0.0172814 | 2280371    | 5080                          | 5113                            | 10193                           |
| MEX  | 2014 | country | 2_Amr   | Mexico   | 18917 | 19121 | 38038 | 0.0083231 | 0.0084129 | 0.016736  | 2272830    | 4837                          | 5341                            | 10179                           |
| MEX  | 2015 | country | 2_Amr   | Mexico   | 18777 | 17908 | 36685 | 0.0083002 | 0.007916  | 0.0162162 | 2262247    | 4679                          | 5117                            | 9796                            |
| MEX  | 2016 | country | 2_Amr   | Mexico   | 18864 | 16453 | 35317 | 0.0083867 | 0.0073148 | 0.0157015 | 2249269    | 4450                          | 4767                            | 9217                            |
| MEX  | 2017 | country | 2_Amr   | Mexico   | 19110 | 14876 | 33986 | 0.0085497 | 0.0066554 | 0.0152051 | 2235174    | 4719                          | 4238                            | 8958                            |
| MEX  | 2018 | country | 2_Amr   | Mexico   | 19215 | 13441 | 32656 | 0.0086527 | 0.0060526 | 0.0147053 | 2220694    | 4689                          | 3830                            | 8518                            |
| MEX  | 2019 | country | 2_Amr   | Mexico   | 18906 | 12462 | 31368 | 0.0085686 | 0.0056481 | 0.0142167 | 2206420    | 4581                          | 3551                            | 8132                            |

| iso3 | year | level   | whoreg6 | whoname             | nnd | pnd | u5d | nmr       | pnmr      | u5mr      | Livebirths | Neonatal birth defects deaths | 1-59 month birth defects deaths | Under five birth defects deaths |
|------|------|---------|---------|---------------------|-----|-----|-----|-----------|-----------|-----------|------------|-------------------------------|---------------------------------|---------------------------------|
| MHL  | 2000 | country | 6_Wpr   | Marshall Islands    | 34  | 42  | 76  | 0.0183024 | 0.0226089 | 0.0409113 | 1858       | 4                             | 6                               | 10                              |
| MHL  | 2001 | country | 6_Wpr   | Marshall Islands    | 34  | 42  | 76  | 0.0183121 | 0.0226209 | 0.040933  | 1857       | 4                             | 3                               | 7                               |
| MHL  | 2002 | country | 6_Wpr   | Marshall Islands    | 34  | 41  | 75  | 0.0182958 | 0.0220626 | 0.0403584 | 1858       | 4                             | 5                               | 8                               |
| MHL  | 2003 | country | 6_Wpr   | Marshall Islands    | 33  | 41  | 74  | 0.0182259 | 0.0226443 | 0.0408702 | 1811       | 4                             | 6                               | 9                               |
| MHL  | 2004 | country | 6_Wpr   | Marshall Islands    | 33  | 40  | 73  | 0.0181264 | 0.0219714 | 0.0400978 | 1821       | 4                             | 4                               | 7                               |
| MHL  | 2005 | country | 6_Wpr   | Marshall Islands    | 32  | 40  | 72  | 0.0180061 | 0.0225077 | 0.0405138 | 1777       | 4                             | 5                               | 9                               |
| MHL  | 2006 | country | 6_Wpr   | Marshall Islands    | 32  | 39  | 71  | 0.0179191 | 0.0218389 | 0.039758  | 1786       | 4                             | 6                               | 10                              |
| MHL  | 2007 | country | 6_Wpr   | Marshall Islands    | 31  | 39  | 70  | 0.0178536 | 0.022461  | 0.0403145 | 1736       | 4                             | 6                               | 10                              |
| MHL  | 2008 | country | 6_Wpr   | Marshall Islands    | 31  | 38  | 69  | 0.0177825 | 0.0217979 | 0.0395804 | 1743       | 4                             | 5                               | 9                               |
| MHL  | 2009 | country | 6_Wpr   | Marshall Islands    | 30  | 37  | 67  | 0.0176893 | 0.0218167 | 0.039506  | 1696       | 4                             | 4                               | 8                               |
| MHL  | 2010 | country | 6_Wpr   | Marshall Islands    | 29  | 36  | 65  | 0.0176194 | 0.0218724 | 0.0394918 | 1646       | 3                             | 6                               | 9                               |
| MHL  | 2011 | country | 6_Wpr   | Marshall Islands    | 28  | 35  | 63  | 0.0175328 | 0.021916  | 0.0394488 | 1597       | 3                             | 5                               | 8                               |
| MHL  | 2012 | country | 6_Wpr   | Marshall Islands    | 27  | 34  | 61  | 0.0173985 | 0.0219092 | 0.0393077 | 1552       | 3                             | 4                               | 7                               |
| MHL  | 2013 | country | 6_Wpr   | Marshall Islands    | 26  | 33  | 59  | 0.0171459 | 0.0217621 | 0.038908  | 1516       | 3                             | 4                               | 7                               |
| MHL  | 2014 | country | 6_Wpr   | Marshall Islands    | 25  | 31  | 56  | 0.0168938 | 0.0209483 | 0.0378422 | 1480       | 3                             | 3                               | 7                               |
| MHL  | 2015 | country | 6_Wpr   | Marshall Islands    | 24  | 29  | 53  | 0.0166086 | 0.0200687 | 0.0366773 | 1445       | 3                             | 3                               | 6                               |
| MHL  | 2016 | country | 6_Wpr   | Marshall Islands    | 23  | 28  | 51  | 0.0162846 | 0.0198247 | 0.0361092 | 1412       | 3                             | 3                               | 6                               |
| MHL  | 2017 | country | 6_Wpr   | Marshall Islands    | 22  | 26  | 48  | 0.0159243 | 0.0188197 | 0.034744  | 1382       | 3                             | 3                               | 6                               |
| MHL  | 2018 | country | 6_Wpr   | Marshall Islands    | 22  | 24  | 46  | 0.0156377 | 0.0170593 | 0.032697  | 1407       | 3                             | 3                               | 6                               |
| MHL  | 2019 | country | 6_Wpr   | Marshall Islands    | 21  | 23  | 44  | 0.0153136 | 0.0167721 | 0.0320857 | 1371       | 3                             | 3                               | 6                               |
| MKD  | 2000 | country | 4_Eur   | Republic of North M | 240 | 184 | 424 | 0.0090939 | 0.006972  | 0.0160658 | 26391      | 32                            | 39                              | 71                              |
| MKD  | 2001 | country | 4_Eur   | Republic of North M | 223 | 171 | 394 | 0.0086079 | 0.0066007 | 0.0152085 | 25907      | 33                            | 47                              | 80                              |
| MKD  | 2002 | country | 4_Eur   | Republic of North M | 214 | 159 | 373 | 0.0084376 | 0.0062691 | 0.0147066 | 25363      | 34                            | 47                              | 81                              |
| MKD  | 2003 | country | 4_Eur   | Republic of North M | 212 | 146 | 358 | 0.0085246 | 0.0058707 | 0.0143953 | 24869      | 32                            | 44                              | 77                              |
| MKD  | 2004 | country | 4_Eur   | Republic of North M | 214 | 132 | 346 | 0.0087952 | 0.0054251 | 0.0142202 | 24332      | 37                            | 42                              | 79                              |
| MKD  | 2005 | country | 4_Eur   | Republic of North M | 215 | 117 | 332 | 0.0090089 | 0.0049025 | 0.0139114 | 23865      | 40                            | 40                              | 80                              |
| MKD  | 2006 | country | 4_Eur   | Republic of North M | 208 | 107 | 315 | 0.0088545 | 0.004555  | 0.0134094 | 23491      | 28                            | 47                              | 76                              |
| MKD  | 2007 | country | 4_Eur   | Republic of North M | 196 | 98  | 294 | 0.0084678 | 0.0042339 | 0.0127017 | 23147      | 40                            | 36                              | 75                              |
| MKD  | 2008 | country | 4_Eur   | Republic of North M | 179 | 91  | 270 | 0.0077974 | 0.003964  | 0.0117615 | 22956      | 24                            | 35                              | 59                              |
| MKD  | 2009 | country | 4_Eur   | Republic of North M | 163 | 84  | 247 | 0.0070756 | 0.0036463 | 0.010722  | 23037      | 19                            | 23                              | 42                              |
| MKD  | 2010 | country | 4_Eur   | Republic of North M | 152 | 80  | 232 | 0.0066042 | 0.0034759 | 0.0100801 | 23016      | 12                            | 28                              | 39                              |
| MKD  | 2011 | country | 4_Eur   | Republic of North M | 153 | 77  | 230 | 0.006602  | 0.0033226 | 0.0099246 | 23175      | 13                            | 21                              | 34                              |
| MKD  | 2012 | country | 4_Eur   | Republic of North M | 164 | 78  | 242 | 0.0070388 | 0.0033477 | 0.0103865 | 23300      | 8                             | 12                              | 20                              |
| MKD  | 2013 | country | 4_Eur   | Republic of North M | 185 | 80  | 265 | 0.0079195 | 0.0034246 | 0.0113441 | 23360      | 10                            | 31                              | 40                              |
| MKD  | 2014 | country | 4_Eur   | Republic of North M | 211 | 80  | 291 | 0.0090388 | 0.003427  | 0.0124659 | 23344      | 13                            | 22                              | 34                              |
| MKD  | 2015 | country | 4_Eur   | Republic of North M | 223 | 78  | 301 | 0.009605  | 0.0033596 | 0.0129646 | 23217      | 12                            | 21                              | 33                              |
| MKD  | 2016 | country | 4_Eur   | Republic of North M | 203 | 74  | 277 | 0.0088092 | 0.0032112 | 0.0120204 | 23044      | 11                            | 20                              | 31                              |
| MKD  | 2017 | country | 4_Eur   | Republic of North M | 161 | 67  | 228 | 0.0070434 | 0.0029311 | 0.0099745 | 22858      | 9                             | 18                              | 27                              |
| MKD  | 2018 | country | 4_Eur   | Republic of North M | 119 | 59  | 178 | 0.0052845 | 0.0026201 | 0.0079046 | 22519      | 7                             | 16                              | 22                              |
| MKD  | 2019 | country | 4_Eur   | Republic of North M | 87  | 50  | 137 | 0.0039164 | 0.0022508 | 0.0061673 | 22214      | 5                             | 13                              | 18                              |

| iso3 | year | level   | whoreg6 | whoname | nnd   | pnd   | u5d   | nmr       | pnmr      | u5mr      | Livebirths | Neonatal birth defects deaths | 1-59 month birth defects deaths | Under five birth defects deaths |
|------|------|---------|---------|---------|-------|-------|-------|-----------|-----------|-----------|------------|-------------------------------|---------------------------------|---------------------------------|
| MLI  | 2000 | country | 1_Afr   | Mali    | 27196 | 69152 | 96348 | 0.050724  | 0.1289776 | 0.1797016 | 536157     | 964                           | 61                              | 1025                            |
| MLI  | 2001 | country | 1_Afr   | Mali    | 27080 | 72833 | 99913 | 0.0490332 | 0.1318775 | 0.1809108 | 552279     | 1007                          | 83                              | 1090                            |
| MLI  | 2002 | country | 1_Afr   | Mali    | 26958 | 64979 | 91937 | 0.0473714 | 0.1141832 | 0.1615546 | 569077     | 1034                          | 104                             | 1139                            |
| MLI  | 2003 | country | 1_Afr   | Mali    | 26885 | 65099 | 91984 | 0.0458539 | 0.1110305 | 0.1568844 | 586319     | 1077                          | 180                             | 1257                            |
| MLI  | 2004 | country | 1_Afr   | Mali    | 26893 | 64911 | 91804 | 0.0445417 | 0.1075087 | 0.1520505 | 603771     | 1152                          | 225                             | 1377                            |
| MLI  | 2005 | country | 1_Afr   | Mali    | 26955 | 63604 | 90559 | 0.0434001 | 0.1024091 | 0.1458092 | 621082     | 1166                          | 307                             | 1473                            |
| MLI  | 2006 | country | 1_Afr   | Mali    | 27047 | 63320 | 90367 | 0.0424029 | 0.0992704 | 0.1416733 | 637858     | 1211                          | 305                             | 1516                            |
| MLI  | 2007 | country | 1_Afr   | Mali    | 27143 | 62699 | 89842 | 0.0415105 | 0.0958872 | 0.1373977 | 653883     | 1246                          | 233                             | 1479                            |
| MLI  | 2008 | country | 1_Afr   | Mali    | 27183 | 61433 | 88616 | 0.0406301 | 0.0918231 | 0.1324532 | 669036     | 1226                          | 490                             | 1716                            |
| MLI  | 2009 | country | 1_Afr   | Mali    | 27145 | 63900 | 91045 | 0.0397295 | 0.093524  | 0.1332535 | 683245     | 1300                          | 396                             | 1696                            |
| MLI  | 2010 | country | 1_Afr   | Mali    | 27030 | 62230 | 89260 | 0.0388087 | 0.089348  | 0.1281568 | 696493     | 1305                          | 475                             | 1780                            |
| MLI  | 2011 | country | 1_Afr   | Mali    | 26858 | 59649 | 86507 | 0.0378883 | 0.0841466 | 0.1220349 | 708874     | 1326                          | 418                             | 1745                            |
| MLI  | 2012 | country | 1_Afr   | Mali    | 26672 | 57423 | 84095 | 0.0370078 | 0.0796756 | 0.1166835 | 720712     | 1332                          | 491                             | 1824                            |
| MLI  | 2013 | country | 1_Afr   | Mali    | 26519 | 56404 | 82923 | 0.0362124 | 0.0770219 | 0.1132343 | 732318     | 1337                          | 275                             | 1612                            |
| MLI  | 2014 | country | 1_Afr   | Mali    | 26405 | 55292 | 81697 | 0.035495  | 0.0743261 | 0.1098211 | 743907     | 1396                          | 313                             | 1709                            |
| MLI  | 2015 | country | 1_Afr   | Mali    | 26271 | 54014 | 80285 | 0.034761  | 0.0714703 | 0.1062313 | 755760     | 1395                          | 431                             | 1826                            |
| MLI  | 2016 | country | 1_Afr   | Mali    | 26165 | 51387 | 77552 | 0.0340692 | 0.0669103 | 0.1009795 | 767996     | 1405                          | 998                             | 2404                            |
| MLI  | 2017 | country | 1_Afr   | Mali    | 26116 | 50278 | 76394 | 0.0334509 | 0.0643984 | 0.0978493 | 780726     | 1397                          | 800                             | 2197                            |
| MLI  | 2018 | country | 1_Afr   | Mali    | 26034 | 49794 | 75828 | 0.0327891 | 0.0627148 | 0.0955039 | 793983     | 1442                          | 1343                            | 2786                            |
| MLI  | 2019 | country | 1_Afr   | Mali    | 25958 | 48718 | 74676 | 0.0321344 | 0.0603099 | 0.0924442 | 807796     | 1425                          | 911                             | 2336                            |
| MLT  | 2000 | country | 4_Eur   | Malta   | 22    | 12    | 34    | 0.0050526 | 0.002756  | 0.0078086 | 4354       | 6                             | 0                               | 6                               |
| MLT  | 2001 | country | 4_Eur   | Malta   | 21    | 11    | 32    | 0.0048843 | 0.0025585 | 0.0074428 | 4299       | 5                             | 2                               | 8                               |
| MLT  | 2002 | country | 4_Eur   | Malta   | 19    | 11    | 30    | 0.0047445 | 0.0027468 | 0.0074913 | 4005       | 10                            | 5                               | 15                              |
| MLT  | 2003 | country | 4_Eur   | Malta   | 18    | 10    | 28    | 0.0044009 | 0.0024449 | 0.0068458 | 4090       | 9                             | 3                               | 11                              |
| MLT  | 2004 | country | 4_Eur   | Malta   | 18    | 9     | 27    | 0.0045665 | 0.0022833 | 0.0068498 | 3942       | 10                            | 2                               | 12                              |
| MLT  | 2005 | country | 4_Eur   | Malta   | 17    | 10    | 27    | 0.0045228 | 0.0026604 | 0.0071832 | 3759       | 4                             | 2                               | 6                               |
| MLT  | 2006 | country | 4_Eur   | Malta   | 17    | 9     | 26    | 0.0045017 | 0.0023832 | 0.0068849 | 3776       | 8                             | 2                               | 10                              |
| MLT  | 2007 | country | 4_Eur   | Malta   | 17    | 9     | 26    | 0.0045018 | 0.0023833 | 0.0068851 | 3776       | 9                             | 5                               | 13                              |
| MLT  | 2008 | country | 4_Eur   | Malta   | 18    | 8     | 26    | 0.0045206 | 0.0020091 | 0.0065297 | 3982       | 8                             | 2                               | 10                              |
| MLT  | 2009 | country | 4_Eur   | Malta   | 18    | 8     | 26    | 0.0045418 | 0.0020186 | 0.0065604 | 3963       | 10                            | 3                               | 13                              |
| MLT  | 2010 | country | 4_Eur   | Malta   | 18    | 9     | 27    | 0.0045687 | 0.0022844 | 0.0068531 | 3940       | 11                            | 3                               | 14                              |
| MLT  | 2011 | country | 4_Eur   | Malta   | 18    | 9     | 27    | 0.0045889 | 0.0022944 | 0.0068833 | 3923       | 8                             | 5                               | 12                              |
| MLT  | 2012 | country | 4_Eur   | Malta   | 19    | 8     | 27    | 0.0046112 | 0.0019416 | 0.0065528 | 4120       | 10                            | 0                               | 10                              |
| MLT  | 2013 | country | 4_Eur   | Malta   | 19    | 9     | 28    | 0.0046387 | 0.0021973 | 0.006836  | 4096       | 5                             | 2                               | 8                               |
| MLT  | 2014 | country | 4_Eur   | Malta   | 19    | 10    | 29    | 0.0046729 | 0.0024594 | 0.0071323 | 4066       | 5                             | 4                               | 9                               |
| MLT  | 2015 | country | 4_Eur   | Malta   | 20    | 9     | 29    | 0.0047101 | 0.0021196 | 0.0068297 | 4246       | 8                             | 3                               | 11                              |
| MLT  | 2016 | country | 4_Eur   | Malta   | 20    | 10    | 30    | 0.0047456 | 0.0023728 | 0.0071184 | 4214       | 6                             | 4                               | 10                              |
| MLT  | 2017 | country | 4_Eur   | Malta   | 20    | 10    | 30    | 0.0047666 | 0.0023833 | 0.0071499 | 4196       | 6                             | 4                               | 10                              |
| MLT  | 2018 | country | 4_Eur   | Malta   | 20    | 10    | 30    | 0.0047557 | 0.0023778 | 0.0071335 | 4205       | 7                             | 4                               | 10                              |
| MLT  | 2019 | country | 4_Eur   | Malta   | 20    | 10    | 30    | 0.0047058 | 0.0023529 | 0.0070587 | 4250       | 6                             | 4                               | 10                              |

| iso3 | year | level   | whoreg6 | whoname    | nnd   | pnd   | u5d    | nmr       | pnmr      | u5mr      | Livebirths | Neonatal birth defects deaths | 1-59 month birth defects deaths | Under five birth defects deaths |
|------|------|---------|---------|------------|-------|-------|--------|-----------|-----------|-----------|------------|-------------------------------|---------------------------------|---------------------------------|
| MMR  | 2000 | country | 3_Sear  | Myanmar    | 42752 | 57185 | 99937  | 0.0372845 | 0.0498712 | 0.0871557 | 1146644    | 2959                          | 2090                            | 5049                            |
| MMR  | 2001 | country | 3_Sear  | Myanmar    | 41708 | 58981 | 100689 | 0.0363082 | 0.0513452 | 0.0876535 | 1148720    | 2971                          | 1629                            | 4600                            |
| MMR  | 2002 | country | 3_Sear  | Myanmar    | 40460 | 55797 | 96257  | 0.035294  | 0.0486724 | 0.0839665 | 1146370    | 2916                          | 1813                            | 4730                            |
| MMR  | 2003 | country | 3_Sear  | Myanmar    | 39072 | 53694 | 92766  | 0.0342946 | 0.0471286 | 0.0814232 | 1139304    | 2890                          | 1961                            | 4850                            |
| MMR  | 2004 | country | 3_Sear  | Myanmar    | 37539 | 52406 | 89945  | 0.0332941 | 0.0464799 | 0.079774  | 1127498    | 2826                          | 2265                            | 5090                            |
| MMR  | 2005 | country | 3_Sear  | Myanmar    | 35946 | 49351 | 85297  | 0.0323484 | 0.0444115 | 0.07676   | 1111213    | 2728                          | 2137                            | 4864                            |
| MMR  | 2006 | country | 3_Sear  | Myanmar    | 34343 | 47473 | 81816  | 0.0314755 | 0.0435095 | 0.074985  | 1091103    | 2672                          | 1836                            | 4507                            |
| MMR  | 2007 | country | 3_Sear  | Myanmar    | 32736 | 45435 | 78171  | 0.0306283 | 0.0425096 | 0.073138  | 1068814    | 2604                          | 1909                            | 4514                            |
| MMR  | 2008 | country | 3_Sear  | Myanmar    | 31512 | 63483 | 94995  | 0.0301287 | 0.060696  | 0.0908246 | 1045914    | 2531                          | 1876                            | 4408                            |
| MMR  | 2009 | country | 3_Sear  | Myanmar    | 29637 | 38516 | 68153  | 0.0289504 | 0.0376233 | 0.0665736 | 1023718    | 2442                          | 2033                            | 4475                            |
| MMR  | 2010 | country | 3_Sear  | Myanmar    | 28284 | 36006 | 64290  | 0.028186  | 0.0358809 | 0.0640669 | 1003477    | 2359                          | 1967                            | 4325                            |
| MMR  | 2011 | country | 3_Sear  | Myanmar    | 27078 | 33957 | 61035  | 0.0274551 | 0.0344304 | 0.0618855 | 986264     | 2278                          | 1924                            | 4202                            |
| MMR  | 2012 | country | 3_Sear  | Myanmar    | 26013 | 31804 | 57817  | 0.0267541 | 0.03271   | 0.0594641 | 972299     | 2173                          | 1681                            | 3854                            |
| MMR  | 2013 | country | 3_Sear  | Myanmar    | 25056 | 29366 | 54422  | 0.0260591 | 0.0305416 | 0.0566007 | 961507     | 2143                          | 1792                            | 3935                            |
| MMR  | 2014 | country | 3_Sear  | Myanmar    | 24228 | 27051 | 51279  | 0.0254    | 0.0283595 | 0.0537595 | 953858     | 2117                          | 1854                            | 3971                            |
| MMR  | 2015 | country | 3_Sear  | Myanmar    | 23502 | 25355 | 48857  | 0.0247641 | 0.0267162 | 0.0514803 | 949034     | 2043                          | 1663                            | 3706                            |
| MMR  | 2016 | country | 3_Sear  | Myanmar    | 22852 | 23692 | 46544  | 0.0241483 | 0.0250356 | 0.0491839 | 946319     | 2017                          | 1889                            | 3906                            |
| MMR  | 2017 | country | 3_Sear  | Myanmar    | 22250 | 23034 | 45284  | 0.0235542 | 0.024384  | 0.0479382 | 944631     | 1999                          | 1673                            | 3672                            |
| MMR  | 2018 | country | 3_Sear  | Myanmar    | 21728 | 23342 | 45070  | 0.0230379 | 0.024749  | 0.0477868 | 943143     | 1984                          | 1990                            | 3974                            |
| MMR  | 2019 | country | 3_Sear  | Myanmar    | 21134 | 23951 | 45085  | 0.02245   | 0.0254425 | 0.0478925 | 941381     | 1917                          | 1924                            | 3841                            |
| MNE  | 2000 | country | 4_Eur   | Montenegro | 74    | 47    | 121    | 0.0087519 | 0.0055587 | 0.0143106 | 8455       | 6                             | 12                              | 18                              |
| MNE  | 2001 | country | 4_Eur   | Montenegro | 71    | 44    | 115    | 0.0084592 | 0.0052423 | 0.0137016 | 8393       | 6                             | 11                              | 17                              |
| MNE  | 2002 | country | 4_Eur   | Montenegro | 69    | 40    | 109    | 0.0083309 | 0.0048295 | 0.0131604 | 8282       | 6                             | 10                              | 16                              |
| MNE  | 2003 | country | 4_Eur   | Montenegro | 66    | 36    | 102    | 0.0080223 | 0.0043758 | 0.0123981 | 8227       | 5                             | 9                               | 14                              |
| MNE  | 2004 | country | 4_Eur   | Montenegro | 62    | 33    | 95     | 0.0075385 | 0.0040124 | 0.0115509 | 8224       | 6                             | 8                               | 13                              |
| MNE  | 2005 | country | 4_Eur   | Montenegro | 57    | 31    | 88     | 0.0068949 | 0.0037499 | 0.0106448 | 8267       | 6                             | 9                               | 14                              |
| MNE  | 2006 | country | 4_Eur   | Montenegro | 53    | 28    | 81     | 0.0064817 | 0.0034243 | 0.009906  | 8177       | 3                             | 4                               | 7                               |
| MNE  | 2007 | country | 4_Eur   | Montenegro | 48    | 25    | 73     | 0.0059439 | 0.0030958 | 0.0090397 | 8075       | 6                             | 5                               | 11                              |
| MNE  | 2008 | country | 4_Eur   | Montenegro | 43    | 23    | 66     | 0.0054133 | 0.0028955 | 0.0083087 | 7943       | 1                             | 0                               | 1                               |
| MNE  | 2009 | country | 4_Eur   | Montenegro | 38    | 20    | 58     | 0.0047646 | 0.0025077 | 0.0072723 | 7976       | 4                             | 0                               | 4                               |
| MNE  | 2010 | country | 4_Eur   | Montenegro | 34    | 18    | 52     | 0.0043877 | 0.0023229 | 0.0067106 | 7749       | 3                             | 1                               | 4                               |
| MNE  | 2011 | country | 4_Eur   | Montenegro | 29    | 16    | 45     | 0.0037764 | 0.0020835 | 0.0058599 | 7679       | 2                             | 1                               | 3                               |
| MNE  | 2012 | country | 4_Eur   | Montenegro | 25    | 15    | 40     | 0.00333   | 0.001998  | 0.005328  | 7507       | 2                             | 1                               | 3                               |
| MNE  | 2013 | country | 4_Eur   | Montenegro | 21    | 14    | 35     | 0.0027965 | 0.0018644 | 0.0046609 | 7509       | 2                             | 1                               | 3                               |
| MNE  | 2014 | country | 4_Eur   | Montenegro | 18    | 12    | 30     | 0.0024323 | 0.0016216 | 0.0040539 | 7400       | 1                             | 1                               | 2                               |
| MNE  | 2015 | country | 4_Eur   | Montenegro | 16    | 11    | 27     | 0.0021215 | 0.0014586 | 0.0035801 | 7542       | 1                             | 1                               | 2                               |
| MNE  | 2016 | country | 4_Eur   | Montenegro | 13    | 10    | 23     | 0.0017319 | 0.0013322 | 0.0030641 | 7506       | 1                             | 1                               | 2                               |
| MNE  | 2017 | country | 4_Eur   | Montenegro | 12    | 9     | 21     | 0.001664  | 0.001248  | 0.002912  | 7211       | 1                             | 1                               | 2                               |
| MNE  | 2018 | country | 4_Eur   | Montenegro | 10    | 9     | 19     | 0.0013799 | 0.0012419 | 0.0026218 | 7247       | 1                             | 1                               | 1                               |
| MNE  | 2019 | country | 4_Eur   | Montenegro | 10    | 7     | 17     | 0.0013988 | 0.0009791 | 0.0023779 | 7149       | 1                             | 1                               | 1                               |

| iso3 | year | level   | whoreg6 | whoname    | nnd   | pnd   | u5d    | nmr       | pnmr      | u5mr      | Livebirths | Neonatal birth defects deaths | 1-59 month birth defects deaths | Under five birth defects deaths |
|------|------|---------|---------|------------|-------|-------|--------|-----------|-----------|-----------|------------|-------------------------------|---------------------------------|---------------------------------|
| MNG  | 2000 | country | 6_Wpr   | Mongolia   | 1089  | 2004  | 3093   | 0.0235072 | 0.0432622 | 0.0667695 | 46326      | 117                           | 195                             | 312                             |
| MNG  | 2001 | country | 6_Wpr   | Mongolia   | 1020  | 1809  | 2829   | 0.0221414 | 0.039272  | 0.0614134 | 46067      | 115                           | 200                             | 315                             |
| MNG  | 2002 | country | 6_Wpr   | Mongolia   | 967   | 1623  | 2590   | 0.0208318 | 0.0349606 | 0.0557924 | 46419      | 111                           | 206                             | 317                             |
| MNG  | 2003 | country | 6_Wpr   | Mongolia   | 926   | 1485  | 2411   | 0.0195335 | 0.0313212 | 0.0508547 | 47406      | 108                           | 201                             | 309                             |
| MNG  | 2004 | country | 6_Wpr   | Mongolia   | 898   | 1374  | 2272   | 0.0183217 | 0.0280339 | 0.0463556 | 49013      | 109                           | 202                             | 311                             |
| MNG  | 2005 | country | 6_Wpr   | Mongolia   | 876   | 1296  | 2172   | 0.0170955 | 0.0252959 | 0.0423914 | 51241      | 112                           | 195                             | 307                             |
| MNG  | 2006 | country | 6_Wpr   | Mongolia   | 859   | 1241  | 2100   | 0.015909  | 0.0229902 | 0.0388992 | 53995      | 114                           | 207                             | 321                             |
| MNG  | 2007 | country | 6_Wpr   | Mongolia   | 843   | 1208  | 2051   | 0.0147453 | 0.021138  | 0.0358833 | 57171      | 119                           | 208                             | 327                             |
| MNG  | 2008 | country | 6_Wpr   | Mongolia   | 823   | 1191  | 2014   | 0.0135847 | 0.0196623 | 0.033247  | 60583      | 124                           | 207                             | 331                             |
| MNG  | 2009 | country | 6_Wpr   | Mongolia   | 800   | 1179  | 1979   | 0.0124882 | 0.0184091 | 0.0308973 | 64060      | 127                           | 207                             | 334                             |
| MNG  | 2010 | country | 6_Wpr   | Mongolia   | 784   | 1153  | 1937   | 0.0116307 | 0.0171103 | 0.0287409 | 67408      | 136                           | 214                             | 350                             |
| MNG  | 2011 | country | 6_Wpr   | Mongolia   | 768   | 1114  | 1882   | 0.0109098 | 0.0158309 | 0.0267407 | 70396      | 137                           | 216                             | 353                             |
| MNG  | 2012 | country | 6_Wpr   | Mongolia   | 757   | 1054  | 1811   | 0.0103628 | 0.014435  | 0.0247978 | 73050      | 145                           | 213                             | 357                             |
| MNG  | 2013 | country | 6_Wpr   | Mongolia   | 753   | 975   | 1728   | 0.0100246 | 0.01298   | 0.0230046 | 75116      | 151                           | 204                             | 355                             |
| MNG  | 2014 | country | 6_Wpr   | Mongolia   | 752   | 884   | 1636   | 0.0098242 | 0.0115487 | 0.0213729 | 76545      | 156                           | 192                             | 348                             |
| MNG  | 2015 | country | 6_Wpr   | Mongolia   | 743   | 824   | 1567   | 0.0095987 | 0.0106449 | 0.0202436 | 77406      | 156                           | 179                             | 334                             |
| MNG  | 2016 | country | 6_Wpr   | Mongolia   | 722   | 761   | 1483   | 0.0093138 | 0.00982   | 0.0191338 | 77519      | 156                           | 167                             | 323                             |
| MNG  | 2017 | country | 6_Wpr   | Mongolia   | 690   | 660   | 1350   | 0.0089435 | 0.0085547 | 0.0174982 | 77151      | 153                           | 157                             | 311                             |
| MNG  | 2018 | country | 6_Wpr   | Mongolia   | 653   | 610   | 1263   | 0.0085562 | 0.0079928 | 0.016549  | 76319      | 147                           | 149                             | 296                             |
| MNG  | 2019 | country | 6_Wpr   | Mongolia   | 611   | 572   | 1183   | 0.0081313 | 0.0076123 | 0.0157435 | 75142      | 138                           | 143                             | 281                             |
| MOZ  | 2000 | country | 1_Afr   | Mozambique | 36753 | 91796 | 128549 | 0.0461353 | 0.1152295 | 0.1613647 | 796635     | 1456                          | 124                             | 1580                            |
| MOZ  | 2001 | country | 1_Afr   | Mozambique | 35984 | 89739 | 125723 | 0.0440733 | 0.1099129 | 0.1539862 | 816458     | 1479                          | 143                             | 1621                            |
| MOZ  | 2002 | country | 1_Afr   | Mozambique | 35264 | 87781 | 123045 | 0.0422226 | 0.1051021 | 0.1473246 | 835193     | 1496                          | 185                             | 1681                            |
| MOZ  | 2003 | country | 1_Afr   | Mozambique | 34601 | 87099 | 121700 | 0.0405686 | 0.1021209 | 0.1426895 | 852902     | 1516                          | 246                             | 1762                            |
| MOZ  | 2004 | country | 1_Afr   | Mozambique | 34023 | 85331 | 119354 | 0.0391258 | 0.0981289 | 0.1372547 | 869579     | 1545                          | 313                             | 1858                            |
| MOZ  | 2005 | country | 1_Afr   | Mozambique | 33500 | 85506 | 119006 | 0.0378395 | 0.0965823 | 0.1344218 | 885318     | 1579                          | 382                             | 1961                            |
| MOZ  | 2006 | country | 1_Afr   | Mozambique | 33111 | 75361 | 108472 | 0.0367773 | 0.083705  | 0.1204823 | 900311     | 1614                          | 406                             | 2021                            |
| MOZ  | 2007 | country | 1_Afr   | Mozambique | 32807 | 72018 | 104825 | 0.03586   | 0.0787201 | 0.1145801 | 914864     | 1645                          | 437                             | 2082                            |
| MOZ  | 2008 | country | 1_Afr   | Mozambique | 32592 | 68944 | 101536 | 0.0350691 | 0.0741841 | 0.1092532 | 929365     | 1673                          | 501                             | 2175                            |
| MOZ  | 2009 | country | 1_Afr   | Mozambique | 32409 | 65622 | 98031  | 0.0343282 | 0.0695083 | 0.1038365 | 944093     | 1700                          | 571                             | 2271                            |
| MOZ  | 2010 | country | 1_Afr   | Mozambique | 32337 | 66330 | 98667  | 0.0337071 | 0.06914   | 0.1028472 | 959352     | 1731                          | 625                             | 2355                            |
| MOZ  | 2011 | country | 1_Afr   | Mozambique | 32302 | 63150 | 95452  | 0.0331202 | 0.0647493 | 0.0978695 | 975295     | 1762                          | 668                             | 2430                            |
| MOZ  | 2012 | country | 1_Afr   | Mozambique | 32294 | 60243 | 92537  | 0.0325539 | 0.0607274 | 0.0932813 | 992017     | 1794                          | 706                             | 2500                            |
| MOZ  | 2013 | country | 1_Afr   | Mozambique | 32351 | 58132 | 90483  | 0.0320478 | 0.0575867 | 0.0896346 | 1009460    | 1830                          | 799                             | 2628                            |
| MOZ  | 2014 | country | 1_Afr   | Mozambique | 32315 | 56701 | 89016  | 0.0314429 | 0.0551704 | 0.0866133 | 1027735    | 1860                          | 857                             | 2718                            |
| MOZ  | 2015 | country | 1_Afr   | Mozambique | 32336 | 54698 | 87034  | 0.0308887 | 0.0522498 | 0.0831386 | 1046854    | 1896                          | 913                             | 2808                            |
| MOZ  | 2016 | country | 1_Afr   | Mozambique | 32376 | 52584 | 84960  | 0.0303475 | 0.0492896 | 0.0796371 | 1066841    | 1934                          | 971                             | 2905                            |
| MOZ  | 2017 | country | 1_Afr   | Mozambique | 32386 | 51637 | 84023  | 0.0297811 | 0.0474837 | 0.0772648 | 1087468    | 1970                          | 1062                            | 3032                            |
| MOZ  | 2018 | country | 1_Afr   | Mozambique | 32342 | 50848 | 83190  | 0.0291733 | 0.045866  | 0.0750394 | 1108615    | 1995                          | 1207                            | 3202                            |
| MOZ  | 2019 | country | 1_Afr   | Mozambique | 32259 | 49179 | 81438  | 0.0285459 | 0.0435182 | 0.0720641 | 1130076    | 2012                          | 1218                            | 3230                            |

| iso3 | year | level   | whoreg6 | whoname    | nnd  | pnd  | u5d   | nmr       | pnmr      | u5mr      | Livebirths | Neonatal birth defects deaths | 1-59 month birth defects deaths | Under five birth defects deaths |
|------|------|---------|---------|------------|------|------|-------|-----------|-----------|-----------|------------|-------------------------------|---------------------------------|---------------------------------|
| MRT  | 2000 | country | 1_Afr   | Mauritania | 4318 | 6468 | 10786 | 0.0429415 | 0.0643188 | 0.1072603 | 100555     | 193                           | 43                              | 236                             |
| MRT  | 2001 | country | 1_Afr   | Mauritania | 4385 | 8200 | 12585 | 0.0426146 | 0.0796935 | 0.1223081 | 102899     | 200                           | 61                              | 262                             |
| MRT  | 2002 | country | 1_Afr   | Mauritania | 4460 | 7650 | 12110 | 0.0423538 | 0.0726436 | 0.1149974 | 105304     | 207                           | 138                             | 345                             |
| MRT  | 2003 | country | 1_Afr   | Mauritania | 4540 | 7522 | 12062 | 0.0421178 | 0.0697822 | 0.1119    | 107793     | 216                           | 136                             | 351                             |
| MRT  | 2004 | country | 1_Afr   | Mauritania | 4624 | 8075 | 12699 | 0.0419041 | 0.0731809 | 0.115085  | 110347     | 223                           | 111                             | 333                             |
| MRT  | 2005 | country | 1_Afr   | Mauritania | 4685 | 6677 | 11362 | 0.0414522 | 0.0590733 | 0.1005255 | 113022     | 228                           | 96                              | 324                             |
| MRT  | 2006 | country | 1_Afr   | Mauritania | 4744 | 6855 | 11599 | 0.040968  | 0.0591995 | 0.1001675 | 115798     | 238                           | 94                              | 333                             |
| MRT  | 2007 | country | 1_Afr   | Mauritania | 4801 | 6977 | 11778 | 0.0404464 | 0.05878   | 0.0992264 | 118700     | 248                           | 114                             | 363                             |
| MRT  | 2008 | country | 1_Afr   | Mauritania | 4839 | 7074 | 11913 | 0.0397597 | 0.0581271 | 0.0978868 | 121706     | 254                           | 117                             | 371                             |
| MRT  | 2009 | country | 1_Afr   | Mauritania | 4879 | 7339 | 12218 | 0.039104  | 0.0588236 | 0.0979276 | 124770     | 262                           | 109                             | 371                             |
| MRT  | 2010 | country | 1_Afr   | Mauritania | 4895 | 8303 | 13198 | 0.0382934 | 0.0649501 | 0.1032435 | 127829     | 268                           | 142                             | 410                             |
| MRT  | 2011 | country | 1_Afr   | Mauritania | 4915 | 7672 | 12587 | 0.037562  | 0.0586335 | 0.0961955 | 130850     | 275                           | 150                             | 424                             |
| MRT  | 2012 | country | 1_Afr   | Mauritania | 4944 | 6776 | 11720 | 0.0369647 | 0.0506587 | 0.0876234 | 133749     | 275                           | 189                             | 464                             |
| MRT  | 2013 | country | 1_Afr   | Mauritania | 4944 | 6807 | 11751 | 0.0362175 | 0.049862  | 0.0860795 | 136509     | 277                           | 221                             | 498                             |
| MRT  | 2014 | country | 1_Afr   | Mauritania | 4938 | 6805 | 11743 | 0.0354892 | 0.0489051 | 0.0843944 | 139141     | 282                           | 218                             | 501                             |
| MRT  | 2015 | country | 1_Afr   | Mauritania | 4931 | 6301 | 11232 | 0.0348299 | 0.0445075 | 0.0793374 | 141574     | 294                           | 202                             | 496                             |
| MRT  | 2016 | country | 1_Afr   | Mauritania | 4927 | 6289 | 11216 | 0.0342357 | 0.0436969 | 0.0779326 | 143914     | 302                           | 217                             | 519                             |
| MRT  | 2017 | country | 1_Afr   | Mauritania | 4894 | 6311 | 11205 | 0.0334804 | 0.043173  | 0.0766534 | 146175     | 295                           | 254                             | 548                             |
| MRT  | 2018 | country | 1_Afr   | Mauritania | 4858 | 6301 | 11159 | 0.0327455 | 0.04247   | 0.0752156 | 148356     | 300                           | 257                             | 557                             |
| MRT  | 2019 | country | 1_Afr   | Mauritania | 4820 | 5818 | 10638 | 0.0320155 | 0.0386421 | 0.0706577 | 150552     | 296                           | 259                             | 555                             |
| MUS  | 2000 | country | 1_Afr   | Mauritius  | 249  | 132  | 381   | 0.0123798 | 0.0065628 | 0.0189426 | 20113      | 36                            | 45                              | 80                              |
| MUS  | 2001 | country | 1_Afr   | Mauritius  | 224  | 125  | 349   | 0.0113542 | 0.006336  | 0.0176902 | 19728      | 32                            | 33                              | 65                              |
| MUS  | 2002 | country | 1_Afr   | Mauritius  | 205  | 120  | 325   | 0.010548  | 0.0061744 | 0.0167224 | 19435      | 43                            | 28                              | 71                              |
| MUS  | 2003 | country | 1_Afr   | Mauritius  | 193  | 115  | 308   | 0.0101987 | 0.0060769 | 0.0162756 | 18924      | 44                            | 24                              | 68                              |
| MUS  | 2004 | country | 1_Afr   | Mauritius  | 187  | 109  | 296   | 0.0101007 | 0.0058876 | 0.0159883 | 18513      | 37                            | 28                              | 65                              |
| MUS  | 2005 | country | 1_Afr   | Mauritius  | 182  | 104  | 286   | 0.010157  | 0.005804  | 0.015961  | 17919      | 48                            | 32                              | 80                              |
| MUS  | 2006 | country | 1_Afr   | Mauritius  | 175  | 99   | 274   | 0.0100926 | 0.0057095 | 0.0158021 | 17339      | 33                            | 22                              | 55                              |
| MUS  | 2007 | country | 1_Afr   | Mauritius  | 167  | 94   | 261   | 0.0099938 | 0.0056253 | 0.0156191 | 16710      | 29                            | 23                              | 52                              |
| MUS  | 2008 | country | 1_Afr   | Mauritius  | 157  | 90   | 247   | 0.0097051 | 0.0055635 | 0.0152686 | 16177      | 28                            | 26                              | 55                              |
| MUS  | 2009 | country | 1_Afr   | Mauritius  | 147  | 87   | 234   | 0.009441  | 0.0055875 | 0.0150285 | 15570      | 39                            | 23                              | 62                              |
| MUS  | 2010 | country | 1_Afr   | Mauritius  | 140  | 84   | 224   | 0.0093069 | 0.0055841 | 0.014891  | 15043      | 30                            | 29                              | 59                              |
| MUS  | 2011 | country | 1_Afr   | Mauritius  | 136  | 83   | 219   | 0.0093476 | 0.0057048 | 0.0150525 | 14549      | 35                            | 26                              | 61                              |
| MUS  | 2012 | country | 1_Afr   | Mauritius  | 134  | 83   | 217   | 0.0094745 | 0.0058685 | 0.015343  | 14143      | 35                            | 20                              | 55                              |
| MUS  | 2013 | country | 1_Afr   | Mauritius  | 131  | 81   | 212   | 0.0094944 | 0.0058706 | 0.015365  | 13798      | 27                            | 20                              | 47                              |
| MUS  | 2014 | country | 1_Afr   | Mauritius  | 125  | 78   | 203   | 0.0092502 | 0.0057721 | 0.0150223 | 13513      | 36                            | 24                              | 59                              |
| MUS  | 2015 | country | 1_Afr   | Mauritius  | 121  | 75   | 196   | 0.0090706 | 0.0056223 | 0.0146928 | 13340      | 18                            | 27                              | 45                              |
| MUS  | 2016 | country | 1_Afr   | Mauritius  | 119  | 74   | 193   | 0.0090634 | 0.0056361 | 0.0146995 | 13130      | 25                            | 27                              | 53                              |
| MUS  | 2017 | country | 1_Afr   | Mauritius  | 121  | 74   | 195   | 0.0093153 | 0.005697  | 0.0150123 | 12989      | 25                            | 21                              | 46                              |
| MUS  | 2018 | country | 1_Afr   | Mauritius  | 125  | 74   | 199   | 0.0097377 | 0.0057647 | 0.0155024 | 12837      | 24                            | 25                              | 49                              |
| MUS  | 2019 | country | 1_Afr   | Mauritius  | 130  | 76   | 206   | 0.0101816 | 0.0059523 | 0.0161339 | 12768      | 26                            | 26                              | 52                              |

| iso3 | year | level   | whoreg6 | whoname  | nnd   | pnd   | u5d   | nmr       | pnmr      | u5mr      | Livebirths | Neonatal birth defects deaths | 1-59 month birth defects deaths | Under five birth defects deaths |
|------|------|---------|---------|----------|-------|-------|-------|-----------|-----------|-----------|------------|-------------------------------|---------------------------------|---------------------------------|
| MWI  | 2000 | country | 1_Afr   | Malawi   | 18821 | 61186 | 80007 | 0.0387    | 0.1258114 | 0.1645114 | 486330     | 998                           | 155                             | 1153                            |
| MWI  | 2001 | country | 1_Afr   | Malawi   | 18179 | 56947 | 75126 | 0.0365762 | 0.1145783 | 0.1511545 | 497017     | 1026                          | 228                             | 1254                            |
| MWI  | 2002 | country | 1_Afr   | Malawi   | 17516 | 52280 | 69796 | 0.034427  | 0.1027536 | 0.1371806 | 508787     | 1012                          | 222                             | 1234                            |
| MWI  | 2003 | country | 1_Afr   | Malawi   | 16943 | 47860 | 64803 | 0.0325046 | 0.0918188 | 0.1243234 | 521249     | 995                           | 352                             | 1347                            |
| MWI  | 2004 | country | 1_Afr   | Malawi   | 16504 | 44151 | 60655 | 0.0309081 | 0.0826847 | 0.1135928 | 533969     | 1014                          | 459                             | 1473                            |
| MWI  | 2005 | country | 1_Afr   | Malawi   | 16268 | 41374 | 57642 | 0.0297795 | 0.0757367 | 0.1055162 | 546281     | 1013                          | 530                             | 1543                            |
| MWI  | 2006 | country | 1_Afr   | Malawi   | 16297 | 38863 | 55160 | 0.0292309 | 0.0697054 | 0.0989363 | 557527     | 1032                          | 582                             | 1613                            |
| MWI  | 2007 | country | 1_Afr   | Malawi   | 16478 | 37842 | 54320 | 0.0290471 | 0.0667077 | 0.0957549 | 567285     | 1058                          | 533                             | 1591                            |
| MWI  | 2008 | country | 1_Afr   | Malawi   | 16647 | 36099 | 52746 | 0.0289365 | 0.0627488 | 0.0916853 | 575294     | 1101                          | 602                             | 1703                            |
| MWI  | 2009 | country | 1_Afr   | Malawi   | 16683 | 33978 | 50661 | 0.0286877 | 0.0584273 | 0.087115  | 581539     | 1115                          | 683                             | 1798                            |
| MWI  | 2010 | country | 1_Afr   | Malawi   | 16536 | 33232 | 49768 | 0.0282147 | 0.0567016 | 0.0849164 | 586077     | 1132                          | 728                             | 1860                            |
| MWI  | 2011 | country | 1_Afr   | Malawi   | 16127 | 29377 | 45504 | 0.0273727 | 0.0498627 | 0.0772354 | 589163     | 1126                          | 857                             | 1983                            |
| MWI  | 2012 | country | 1_Afr   | Malawi   | 15546 | 26084 | 41630 | 0.026282  | 0.0440975 | 0.0703794 | 591508     | 1130                          | 954                             | 2084                            |
| MWI  | 2013 | country | 1_Afr   | Malawi   | 14908 | 22815 | 37723 | 0.0251086 | 0.0384253 | 0.0635339 | 593741     | 1088                          | 1030                            | 2117                            |
| MWI  | 2014 | country | 1_Afr   | Malawi   | 14261 | 19896 | 34157 | 0.0239113 | 0.0333587 | 0.05727   | 596412     | 1057                          | 1008                            | 2066                            |
| MWI  | 2015 | country | 1_Afr   | Malawi   | 13695 | 18266 | 31961 | 0.0228209 | 0.0304381 | 0.0532589 | 600109     | 1052                          | 1065                            | 2117                            |
| MWI  | 2016 | country | 1_Afr   | Malawi   | 13265 | 16737 | 30002 | 0.0219174 | 0.0276541 | 0.0495716 | 605226     | 1038                          | 907                             | 1946                            |
| MWI  | 2017 | country | 1_Afr   | Malawi   | 12923 | 15518 | 28441 | 0.0211168 | 0.0253564 | 0.0464732 | 611978     | 1034                          | 919                             | 1953                            |
| MWI  | 2018 | country | 1_Afr   | Malawi   | 12654 | 14013 | 26667 | 0.0204012 | 0.0225928 | 0.042994  | 620256     | 1010                          | 982                             | 1992                            |
| MWI  | 2019 | country | 1_Afr   | Malawi   | 12469 | 13191 | 25660 | 0.0197908 | 0.0209374 | 0.0407282 | 630040     | 1006                          | 956                             | 1962                            |
| MYS  | 2000 | country | 6_Wpr   | Malaysia | 2501  | 2752  | 5253  | 0.0049223 | 0.0054163 | 0.0103385 | 508099     | 569                           | 790                             | 1359                            |
| MYS  | 2001 | country | 6_Wpr   | Malaysia | 2274  | 2494  | 4768  | 0.0045837 | 0.0050272 | 0.0096109 | 496104     | 528                           | 735                             | 1264                            |
| MYS  | 2002 | country | 6_Wpr   | Malaysia | 2099  | 2286  | 4385  | 0.004327  | 0.0047125 | 0.0090396 | 485090     | 490                           | 691                             | 1181                            |
| MYS  | 2003 | country | 6_Wpr   | Malaysia | 1987  | 2143  | 4130  | 0.0041714 | 0.0044989 | 0.0086703 | 476340     | 468                           | 660                             | 1128                            |
| MYS  | 2004 | country | 6_Wpr   | Malaysia | 1923  | 2044  | 3967  | 0.0040856 | 0.0043427 | 0.0084283 | 470676     | 464                           | 639                             | 1103                            |
| MYS  | 2005 | country | 6_Wpr   | Malaysia | 1889  | 1978  | 3867  | 0.0040344 | 0.0042244 | 0.0082588 | 468227     | 454                           | 624                             | 1078                            |
| MYS  | 2006 | country | 6_Wpr   | Malaysia | 1883  | 1934  | 3817  | 0.0040166 | 0.0041254 | 0.008142  | 468805     | 462                           | 615                             | 1077                            |
| MYS  | 2007 | country | 6_Wpr   | Malaysia | 1903  | 1905  | 3808  | 0.004037  | 0.0040412 | 0.0080782 | 471392     | 472                           | 610                             | 1081                            |
| MYS  | 2008 | country | 6_Wpr   | Malaysia | 1945  | 1883  | 3828  | 0.004091  | 0.0039606 | 0.0080517 | 475429     | 480                           | 604                             | 1085                            |
| MYS  | 2009 | country | 6_Wpr   | Malaysia | 1989  | 1869  | 3858  | 0.0041409 | 0.0038911 | 0.0080319 | 480332     | 494                           | 601                             | 1095                            |
| MYS  | 2010 | country | 6_Wpr   | Malaysia | 2022  | 1856  | 3878  | 0.0041626 | 0.0038209 | 0.0079835 | 485749     | 503                           | 598                             | 1101                            |
| MYS  | 2011 | country | 6_Wpr   | Malaysia | 2041  | 1853  | 3894  | 0.0041518 | 0.0037693 | 0.0079211 | 491599     | 513                           | 597                             | 1110                            |
| MYS  | 2012 | country | 6_Wpr   | Malaysia | 2053  | 1868  | 3921  | 0.0041242 | 0.0037525 | 0.0078767 | 497796     | 526                           | 603                             | 1129                            |
| MYS  | 2013 | country | 6_Wpr   | Malaysia | 2072  | 1895  | 3967  | 0.0041109 | 0.0037597 | 0.0078707 | 504023     | 535                           | 612                             | 1148                            |
| MYS  | 2014 | country | 6_Wpr   | Malaysia | 2107  | 1926  | 4033  | 0.0041301 | 0.0037753 | 0.0079053 | 510162     | 547                           | 623                             | 1170                            |
| MYS  | 2015 | country | 6_Wpr   | Malaysia | 2167  | 1945  | 4112  | 0.0042006 | 0.0037702 | 0.0079708 | 515883     | 566                           | 631                             | 1197                            |
| MYS  | 2016 | country | 6_Wpr   | Malaysia | 2246  | 1960  | 4206  | 0.0043113 | 0.0037623 | 0.0080735 | 520962     | 592                           | 638                             | 1230                            |
| MYS  | 2017 | country | 6_Wpr   | Malaysia | 2328  | 1984  | 4312  | 0.0044328 | 0.0037778 | 0.0082105 | 525180     | 611                           | 649                             | 1260                            |
| MYS  | 2018 | country | 6_Wpr   | Malaysia | 2400  | 2024  | 4424  | 0.0045434 | 0.0038316 | 0.0083749 | 528244     | 627                           | 666                             | 1293                            |
| MYS  | 2019 | country | 6_Wpr   | Malaysia | 2448  | 2065  | 4513  | 0.0046131 | 0.0038914 | 0.0085045 | 530659     | 640                           | 684                             | 1325                            |

| iso3 | year | level   | whoreg6 | whoname | nnd   | pnd    | u5d    | nmr       | pnmr      | u5mr      | Livebirths | Neonatal birth defects deaths | 1-59 month birth defects deaths | Under five birth defects deaths |
|------|------|---------|---------|---------|-------|--------|--------|-----------|-----------|-----------|------------|-------------------------------|---------------------------------|---------------------------------|
| NAM  | 2000 | country | 1_Afr   | Namibia | 1248  | 2914   | 4162   | 0.0226038 | 0.0527857 | 0.0753895 | 55212      | 90                            | 29                              | 119                             |
| NAM  | 2001 | country | 1_Afr   | Namibia | 1215  | 2901   | 4116   | 0.0221096 | 0.0527819 | 0.0748915 | 54954      | 91                            | 21                              | 111                             |
| NAM  | 2002 | country | 1_Afr   | Namibia | 1188  | 2932   | 4120   | 0.0216025 | 0.053307  | 0.0749095 | 54994      | 90                            | 27                              | 117                             |
| NAM  | 2003 | country | 1_Afr   | Namibia | 1169  | 2925   | 4094   | 0.0211198 | 0.0528373 | 0.0739571 | 55351      | 87                            | 29                              | 117                             |
| NAM  | 2004 | country | 1_Afr   | Namibia | 1158  | 2902   | 4060   | 0.0206619 | 0.0517719 | 0.0724338 | 56045      | 90                            | 28                              | 118                             |
| NAM  | 2005 | country | 1_Afr   | Namibia | 1157  | 2745   | 3902   | 0.0202677 | 0.0480811 | 0.0683488 | 57086      | 89                            | 35                              | 123                             |
| NAM  | 2006 | country | 1_Afr   | Namibia | 1166  | 2543   | 3709   | 0.0199595 | 0.0435224 | 0.063482  | 58418      | 92                            | 30                              | 123                             |
| NAM  | 2007 | country | 1_Afr   | Namibia | 1184  | 2325   | 3509   | 0.0197667 | 0.0388193 | 0.0585861 | 59899      | 94                            | 42                              | 136                             |
| NAM  | 2008 | country | 1_Afr   | Namibia | 1214  | 2102   | 3316   | 0.0197427 | 0.0341821 | 0.0539248 | 61491      | 97                            | 57                              | 154                             |
| NAM  | 2009 | country | 1_Afr   | Namibia | 1253  | 1955   | 3208   | 0.0198729 | 0.0310011 | 0.050874  | 63051      | 102                           | 70                              | 173                             |
| NAM  | 2010 | country | 1_Afr   | Namibia | 1295  | 1845   | 3140   | 0.0200733 | 0.0286015 | 0.0486748 | 64514      | 105                           | 78                              | 183                             |
| NAM  | 2011 | country | 1_Afr   | Namibia | 1334  | 1932   | 3266   | 0.0202755 | 0.0293694 | 0.0496449 | 65794      | 108                           | 82                              | 190                             |
| NAM  | 2012 | country | 1_Afr   | Namibia | 1367  | 2090   | 3457   | 0.0204163 | 0.0312086 | 0.0516249 | 66956      | 111                           | 87                              | 198                             |
| NAM  | 2013 | country | 1_Afr   | Namibia | 1391  | 1926   | 3317   | 0.0204737 | 0.0283458 | 0.0488195 | 67941      | 115                           | 105                             | 220                             |
| NAM  | 2014 | country | 1_Afr   | Namibia | 1401  | 1835   | 3236   | 0.0203936 | 0.0267145 | 0.0471081 | 68698      | 116                           | 110                             | 226                             |
| NAM  | 2015 | country | 1_Afr   | Namibia | 1403  | 1854   | 3257   | 0.0202369 | 0.0267382 | 0.0469751 | 69329      | 116                           | 129                             | 245                             |
| NAM  | 2016 | country | 1_Afr   | Namibia | 1398  | 1788   | 3186   | 0.0200556 | 0.0256572 | 0.0457128 | 69706      | 117                           | 104                             | 221                             |
| NAM  | 2017 | country | 1_Afr   | Namibia | 1384  | 1696   | 3080   | 0.0197794 | 0.0242383 | 0.0440177 | 69972      | 119                           | 111                             | 230                             |
| NAM  | 2018 | country | 1_Afr   | Namibia | 1364  | 1644   | 3008   | 0.0194514 | 0.0234428 | 0.0428942 | 70124      | 119                           | 116                             | 235                             |
| NAM  | 2019 | country | 1_Afr   | Namibia | 1343  | 1610   | 2953   | 0.0191207 | 0.0229216 | 0.0420424 | 70238      | 119                           | 118                             | 237                             |
| NER  | 2000 | country | 1_Afr   | Niger   | 26194 | 101783 | 127977 | 0.0430647 | 0.1673382 | 0.2104029 | 608247     | 900                           | 52                              | 952                             |
| NER  | 2001 | country | 1_Afr   | Niger   | 26180 | 112445 | 138625 | 0.0417393 | 0.1792728 | 0.221012  | 627227     | 930                           | 66                              | 996                             |
| NER  | 2002 | country | 1_Afr   | Niger   | 26094 | 102617 | 128711 | 0.0403525 | 0.1586905 | 0.199043  | 646651     | 958                           | 90                              | 1049                            |
| NER  | 2003 | country | 1_Afr   | Niger   | 25988 | 105685 | 131673 | 0.0389899 | 0.1585602 | 0.19755   | 666532     | 988                           | 116                             | 1104                            |
| NER  | 2004 | country | 1_Afr   | Niger   | 25879 | 105139 | 131018 | 0.0376752 | 0.1530641 | 0.1907393 | 686898     | 1018                          | 146                             | 1165                            |
| NER  | 2005 | country | 1_Afr   | Niger   | 25793 | 84744  | 110537 | 0.0364398 | 0.1197238 | 0.1561635 | 707826     | 1051                          | 179                             | 1230                            |
| NER  | 2006 | country | 1_Afr   | Niger   | 25664 | 81712  | 107376 | 0.0351832 | 0.1120206 | 0.1472039 | 729438     | 1084                          | 242                             | 1327                            |
| NER  | 2007 | country | 1_Afr   | Niger   | 25525 | 78521  | 104046 | 0.0339546 | 0.1044526 | 0.1384071 | 751740     | 1117                          | 217                             | 1334                            |
| NER  | 2008 | country | 1_Afr   | Niger   | 25328 | 75652  | 100980 | 0.03269   | 0.0976414 | 0.1303314 | 774793     | 1146                          | 408                             | 1554                            |
| NER  | 2009 | country | 1_Afr   | Niger   | 25176 | 71722  | 96898  | 0.0315251 | 0.0898097 | 0.1213348 | 798601     | 1177                          | 462                             | 1639                            |
| NER  | 2010 | country | 1_Afr   | Niger   | 25077 | 68968  | 94045  | 0.0304682 | 0.0837949 | 0.1142631 | 823055     | 1210                          | 448                             | 1658                            |
| NER  | 2011 | country | 1_Afr   | Niger   | 24992 | 66070  | 91062  | 0.0294711 | 0.0779112 | 0.1073824 | 848017     | 1244                          | 333                             | 1577                            |
| NER  | 2012 | country | 1_Afr   | Niger   | 24988 | 64152  | 89140  | 0.02861   | 0.0734514 | 0.1020614 | 873401     | 1277                          | 405                             | 1682                            |
| NER  | 2013 | country | 1_Afr   | Niger   | 25064 | 61981  | 87045  | 0.0278735 | 0.068929  | 0.0968025 | 899204     | 1314                          | 499                             | 1813                            |
| NER  | 2014 | country | 1_Afr   | Niger   | 25111 | 60995  | 86106  | 0.0271365 | 0.0659153 | 0.0930518 | 925358     | 1344                          | 574                             | 1918                            |
| NER  | 2015 | country | 1_Afr   | Niger   | 25253 | 60805  | 86058  | 0.0265254 | 0.0638682 | 0.0903936 | 952032     | 1380                          | 1150                            | 2530                            |
| NER  | 2016 | country | 1_Afr   | Niger   | 25385 | 58584  | 83969  | 0.0259211 | 0.0598208 | 0.0857419 | 979320     | 1416                          | 740                             | 2155                            |
| NER  | 2017 | country | 1_Afr   | Niger   | 25530 | 57692  | 83222  | 0.025343  | 0.0572699 | 0.0826129 | 1007377    | 1456                          | 1458                            | 2914                            |
| NER  | 2018 | country | 1_Afr   | Niger   | 25686 | 57424  | 83110  | 0.0247862 | 0.0554127 | 0.0801989 | 1036301    | 1490                          | 982                             | 2472                            |
| NER  | 2019 | country | 1_Afr   | Niger   | 25861 | 57709  | 83570  | 0.0242569 | 0.0541293 | 0.0783862 | 1066132    | 1522                          | 1008                            | 2530                            |

| iso3 | year | level   | whoreg6 | whoname   | nnd    | pnd    | u5d     | nmr       | pnmr      | u5mr      | Livebirths | Neonatal birth defects deaths | 1-59 month birth defects deaths | Under five birth defects deaths |
|------|------|---------|---------|-----------|--------|--------|---------|-----------|-----------|-----------|------------|-------------------------------|---------------------------------|---------------------------------|
| NGA  | 2000 | country | 1_Afr   | Nigeria   | 244605 | 774479 | 1019084 | 0.0463138 | 0.1466406 | 0.1929543 | 5281475    | 8543                          | 591                             | 9134                            |
| NGA  | 2001 | country | 1_Afr   | Nigeria   | 244322 | 742392 | 986714  | 0.0451826 | 0.1372911 | 0.1824738 | 5407431    | 8697                          | 430                             | 9127                            |
| NGA  | 2002 | country | 1_Afr   | Nigeria   | 243391 | 672278 | 915669  | 0.0439792 | 0.1214764 | 0.1654556 | 5534227    | 8835                          | 475                             | 9309                            |
| NGA  | 2003 | country | 1_Afr   | Nigeria   | 242293 | 760923 | 1003216 | 0.0427986 | 0.1344093 | 0.1772078 | 5661240    | 8966                          | 904                             | 9870                            |
| NGA  | 2004 | country | 1_Afr   | Nigeria   | 241209 | 660162 | 901371  | 0.041674  | 0.1140571 | 0.1557311 | 5788000    | 9092                          | 1068                            | 10160                           |
| NGA  | 2005 | country | 1_Afr   | Nigeria   | 240743 | 717310 | 958053  | 0.0407015 | 0.1212728 | 0.1619742 | 5914850    | 9228                          | 1264                            | 10492                           |
| NGA  | 2006 | country | 1_Afr   | Nigeria   | 240884 | 611254 | 852138  | 0.0398644 | 0.1011576 | 0.141022  | 6042590    | 9375                          | 967                             | 10342                           |
| NGA  | 2007 | country | 1_Afr   | Nigeria   | 241863 | 602159 | 844022  | 0.0391889 | 0.0975674 | 0.1367563 | 6171727    | 9539                          | 973                             | 10513                           |
| NGA  | 2008 | country | 1_Afr   | Nigeria   | 243556 | 606220 | 849776  | 0.0386468 | 0.0961933 | 0.1348401 | 6302104    | 9721                          | 2207                            | 11928                           |
| NGA  | 2009 | country | 1_Afr   | Nigeria   | 246103 | 593047 | 839150  | 0.0382573 | 0.0921907 | 0.130448  | 6432833    | 9931                          | 3268                            | 13199                           |
| NGA  | 2010 | country | 1_Afr   | Nigeria   | 249215 | 600918 | 850133  | 0.0379788 | 0.091576  | 0.1295548 | 6561954    | 10164                         | 2984                            | 13148                           |
| NGA  | 2011 | country | 1_Afr   | Nigeria   | 252363 | 608947 | 861310  | 0.0377382 | 0.0910615 | 0.1287997 | 6687205    | 10393                         | 1880                            | 12273                           |
| NGA  | 2012 | country | 1_Afr   | Nigeria   | 255666 | 598974 | 854640  | 0.0375589 | 0.087993  | 0.1255519 | 6807069    | 10622                         | 1755                            | 12377                           |
| NGA  | 2013 | country | 1_Afr   | Nigeria   | 258745 | 638219 | 896964  | 0.0373868 | 0.0922181 | 0.1296049 | 6920752    | 10833                         | 1917                            | 12749                           |
| NGA  | 2014 | country | 1_Afr   | Nigeria   | 261842 | 606468 | 868310  | 0.0372546 | 0.0862876 | 0.1235421 | 7028451    | 11048                         | 2186                            | 13233                           |
| NGA  | 2015 | country | 1_Afr   | Nigeria   | 264817 | 618048 | 882865  | 0.037136  | 0.0866705 | 0.1238065 | 7131009    | 11268                         | 2380                            | 13649                           |
| NGA  | 2016 | country | 1_Afr   | Nigeria   | 266983 | 615089 | 882072  | 0.036927  | 0.0850743 | 0.1220013 | 7230020    | 11478                         | 4345                            | 15823                           |
| NGA  | 2017 | country | 1_Afr   | Nigeria   | 268731 | 608313 | 877044  | 0.0366721 | 0.0830128 | 0.1196849 | 7327944    | 11679                         | 6447                            | 18126                           |
| NGA  | 2018 | country | 1_Afr   | Nigeria   | 269615 | 594506 | 864121  | 0.0363023 | 0.0800473 | 0.1163496 | 7426939    | 11823                         | 4226                            | 16050                           |
| NGA  | 2019 | country | 1_Afr   | Nigeria   | 269897 | 608580 | 878477  | 0.0358507 | 0.0808382 | 0.1166888 | 7528368    | 11917                         | 4328                            | 16245                           |
| NIC  | 2000 | country | 2_Amr   | Nicaragua | 2257   | 3029   | 5286    | 0.0164616 | 0.0220922 | 0.0385538 | 137107     | 470                           | 303                             | 773                             |
| NIC  | 2001 | country | 2_Amr   | Nicaragua | 2169   | 2805   | 4974    | 0.0158983 | 0.02056   | 0.0364583 | 136430     | 452                           | 300                             | 751                             |
| NIC  | 2002 | country | 2_Amr   | Nicaragua | 2095   | 2603   | 4698    | 0.0154078 | 0.0191439 | 0.0345517 | 135970     | 436                           | 301                             | 737                             |
| NIC  | 2003 | country | 2_Amr   | Nicaragua | 2039   | 2416   | 4455    | 0.0150186 | 0.0177955 | 0.0328141 | 135765     | 424                           | 306                             | 730                             |
| NIC  | 2004 | country | 2_Amr   | Nicaragua | 2007   | 2234   | 4241    | 0.0147829 | 0.0164549 | 0.0312377 | 135765     | 418                           | 313                             | 731                             |
| NIC  | 2005 | country | 2_Amr   | Nicaragua | 1990   | 2053   | 4043    | 0.0146368 | 0.0151002 | 0.029737  | 135959     | 414                           | 318                             | 732                             |
| NIC  | 2006 | country | 2_Amr   | Nicaragua | 1970   | 1893   | 3863    | 0.0144632 | 0.0138979 | 0.0283612 | 136207     | 410                           | 323                             | 733                             |
| NIC  | 2007 | country | 2_Amr   | Nicaragua | 1940   | 1760   | 3700    | 0.014209  | 0.0128907 | 0.0270997 | 136533     | 404                           | 325                             | 730                             |
| NIC  | 2008 | country | 2_Amr   | Nicaragua | 1914   | 1631   | 3545    | 0.0139865 | 0.0119185 | 0.0259051 | 136846     | 399                           | 322                             | 721                             |
| NIC  | 2009 | country | 2_Amr   | Nicaragua | 1888   | 1514   | 3402    | 0.0137693 | 0.0110417 | 0.024811  | 137117     | 392                           | 315                             | 708                             |
| NIC  | 2010 | country | 2_Amr   | Nicaragua | 1860   | 1404   | 3264    | 0.0135503 | 0.0102283 | 0.0237786 | 137266     | 389                           | 305                             | 694                             |
| NIC  | 2011 | country | 2_Amr   | Nicaragua | 1833   | 1299   | 3132    | 0.0133477 | 0.0094591 | 0.0228068 | 137328     | 381                           | 291                             | 672                             |
| NIC  | 2012 | country | 2_Amr   | Nicaragua | 1800   | 1206   | 3006    | 0.0131211 | 0.0087912 | 0.0219123 | 137183     | 371                           | 277                             | 648                             |
| NIC  | 2013 | country | 2_Amr   | Nicaragua | 1757   | 1126   | 2883    | 0.012827  | 0.0082204 | 0.0210474 | 136977     | 375                           | 264                             | 639                             |
| NIC  | 2014 | country | 2_Amr   | Nicaragua | 1696   | 1068   | 2764    | 0.0124149 | 0.0078179 | 0.0202328 | 136610     | 346                           | 231                             | 577                             |
| NIC  | 2015 | country | 2_Amr   | Nicaragua | 1624   | 1020   | 2644    | 0.0119368 | 0.0074972 | 0.019434  | 136050     | 326                           | 272                             | 599                             |
| NIC  | 2016 | country | 2_Amr   | Nicaragua | 1551   | 979    | 2530    | 0.0114576 | 0.0072321 | 0.0186898 | 135368     | 364                           | 253                             | 617                             |
| NIC  | 2017 | country | 2_Amr   | Nicaragua | 1482   | 939    | 2421    | 0.011017  | 0.0069804 | 0.0179973 | 134520     | 357                           | 217                             | 575                             |
| NIC  | 2018 | country | 2_Amr   | Nicaragua | 1416   | 899    | 2315    | 0.0106092 | 0.0067357 | 0.0173449 | 133468     | 320                           | 227                             | 546                             |
| NIC  | 2019 | country | 2_Amr   | Nicaragua | 1352   | 860    | 2212    | 0.0102195 | 0.0065006 | 0.0167201 | 132296     | 316                           | 217                             | 533                             |

| iso3 | year | level   | whoreg6 | whoname     | nnd | pnd | u5d  | nmr       | pnmr      | u5mr      | Livebirths | Neonatal birth defects deaths | 1-59 month birth defects deaths | Under five birth defects deaths |
|------|------|---------|---------|-------------|-----|-----|------|-----------|-----------|-----------|------------|-------------------------------|---------------------------------|---------------------------------|
| NIU  | 2000 | country | 6_Wpr   | Niue        | 0   | 1   | 1    |           |           |           | 0          | 0                             | 0                               | 0                               |
| NIU  | 2001 | country | 6_Wpr   | Niue        | 0   | 1   | 1    |           |           |           | 0          | 0                             | 0                               | 0                               |
| NIU  | 2002 | country | 6_Wpr   | Niue        | 0   | 1   | 1    |           |           |           | 0          | 0                             | 0                               | 0                               |
| NIU  | 2003 | country | 6_Wpr   | Niue        | 0   | 1   | 1    |           |           |           | 0          | 0                             | 0                               | 0                               |
| NIU  | 2004 | country | 6_Wpr   | Niue        | 0   | 1   | 1    |           |           |           | 0          | 0                             | 0                               | 0                               |
| NIU  | 2005 | country | 6_Wpr   | Niue        | 1   | 0   | 1    | 0.0163638 | 0         | 0.0163638 | 61         | 0                             | 0                               | 0                               |
| NIU  | 2006 | country | 6_Wpr   | Niue        | 0   | 1   | 1    |           |           |           | 0          | 0                             | 0                               | 0                               |
| NIU  | 2007 | country | 6_Wpr   | Niue        | 0   | 1   | 1    |           |           |           | 0          | 0                             | 0                               | 0                               |
| NIU  | 2008 | country | 6_Wpr   | Niue        | 0   | 1   | 1    |           |           |           | 0          | 0                             | 0                               | 0                               |
| NIU  | 2009 | country | 6_Wpr   | Niue        | 0   | 1   | 1    |           |           |           | 0          | 0                             | 0                               | 0                               |
| NIU  | 2010 | country | 6_Wpr   | Niue        | 0   | 1   | 1    |           |           |           | 0          | 0                             | 0                               | 0                               |
| NIU  | 2011 | country | 6_Wpr   | Niue        | 0   | 1   | 1    |           |           |           | 0          | 0                             | 0                               | 0                               |
| NIU  | 2012 | country | 6_Wpr   | Niue        | 0   | 1   | 1    |           |           |           | 0          | 0                             | 0                               | 0                               |
| NIU  | 2013 | country | 6_Wpr   | Niue        | 0   | 1   | 1    |           |           |           | 0          | 0                             | 0                               | 0                               |
| NIU  | 2014 | country | 6_Wpr   | Niue        | 0   | 1   | 1    |           |           |           | 0          | 0                             | 0                               | 0                               |
| NIU  | 2015 | country | 6_Wpr   | Niue        | 0   | 1   | 1    |           |           |           | 0          | 0                             | 0                               | 0                               |
| NIU  | 2016 | country | 6_Wpr   | Niue        | 0   | 1   | 1    |           |           |           | 0          | 0                             | 0                               | 0                               |
| NIU  | 2017 | country | 6_Wpr   | Niue        | 0   | 1   | 1    |           |           |           | 0          | 0                             | 0                               | 0                               |
| NIU  | 2018 | country | 6_Wpr   | Niue        | 0   | 1   | 1    |           |           |           | 0          | 0                             | 0                               | 0                               |
| NIU  | 2019 | country | 6_Wpr   | Niue        | 0   | 1   | 1    |           |           |           | 0          | 0                             | 0                               | 0                               |
| NLD  | 2000 | country | 4_Eur   | Netherlands | 756 | 461 | 1217 | 0.0038284 | 0.0023345 | 0.006163  | 197470     | 311                           | 125                             | 436                             |
| NLD  | 2001 | country | 4_Eur   | Netherlands | 753 | 442 | 1195 | 0.0038023 | 0.0022319 | 0.0060342 | 198039     | 290                           | 139                             | 429                             |
| NLD  | 2002 | country | 4_Eur   | Netherlands | 739 | 428 | 1167 | 0.0037292 | 0.0021598 | 0.0058891 | 198164     | 273                           | 119                             | 392                             |
| NLD  | 2003 | country | 4_Eur   | Netherlands | 718 | 412 | 1130 | 0.0036358 | 0.0020863 | 0.005722  | 197483     | 278                           | 141                             | 419                             |
| NLD  | 2004 | country | 4_Eur   | Netherlands | 695 | 392 | 1087 | 0.0035465 | 0.0020003 | 0.0055468 | 195970     | 262                           | 126                             | 388                             |
| NLD  | 2005 | country | 4_Eur   | Netherlands | 666 | 372 | 1038 | 0.0034345 | 0.0019184 | 0.0053529 | 193912     | 219                           | 105                             | 325                             |
| NLD  | 2006 | country | 4_Eur   | Netherlands | 631 | 356 | 987  | 0.0032997 | 0.0018616 | 0.0051613 | 191232     | 245                           | 106                             | 351                             |
| NLD  | 2007 | country | 4_Eur   | Netherlands | 593 | 343 | 936  | 0.0031432 | 0.0018181 | 0.0049612 | 188662     | 175                           | 104                             | 280                             |
| NLD  | 2008 | country | 4_Eur   | Netherlands | 558 | 331 | 889  | 0.0030006 | 0.0017799 | 0.0047806 | 185961     | 183                           | 88                              | 271                             |
| NLD  | 2009 | country | 4_Eur   | Netherlands | 528 | 319 | 847  | 0.0028764 | 0.0017378 | 0.0046143 | 183562     | 181                           | 81                              | 262                             |
| NLD  | 2010 | country | 4_Eur   | Netherlands | 506 | 305 | 811  | 0.0027847 | 0.0016785 | 0.0044632 | 181708     | 180                           | 90                              | 270                             |
| NLD  | 2011 | country | 4_Eur   | Netherlands | 491 | 290 | 781  | 0.0027321 | 0.0016137 | 0.0043458 | 179715     | 178                           | 84                              | 262                             |
| NLD  | 2012 | country | 4_Eur   | Netherlands | 481 | 275 | 756  | 0.0027012 | 0.0015444 | 0.0042456 | 178066     | 147                           | 78                              | 225                             |
| NLD  | 2013 | country | 4_Eur   | Netherlands | 472 | 264 | 736  | 0.0026739 | 0.0014956 | 0.0041695 | 176519     | 147                           | 62                              | 210                             |
| NLD  | 2014 | country | 4_Eur   | Netherlands | 464 | 256 | 720  | 0.0026485 | 0.0014612 | 0.0041097 | 175194     | 138                           | 68                              | 205                             |
| NLD  | 2015 | country | 4_Eur   | Netherlands | 457 | 251 | 708  | 0.0026276 | 0.0014432 | 0.0040707 | 173924     | 134                           | 70                              | 204                             |
| NLD  | 2016 | country | 4_Eur   | Netherlands | 452 | 248 | 700  | 0.0026111 | 0.0014327 | 0.0040438 | 173105     | 126                           | 70                              | 196                             |
| NLD  | 2017 | country | 4_Eur   | Netherlands | 449 | 247 | 696  | 0.0026061 | 0.0014337 | 0.0040398 | 172285     | 130                           | 68                              | 198                             |
| NLD  | 2018 | country | 4_Eur   | Netherlands | 447 | 248 | 695  | 0.0025943 | 0.0014393 | 0.0040336 | 172304     | 128                           | 68                              | 197                             |
| NLD  | 2019 | country | 4_Eur   | Netherlands | 446 | 250 | 696  | 0.002587  | 0.0014501 | 0.0040371 | 172400     | 127                           | 69                              | 196                             |

| iso3 | year | level   | whoreg6 | whoname | nnd   | pnd   | u5d   | nmr       | pnmr      | u5mr      | Livebirths | Neonatal birth defects deaths | 1-59 month birth defects deaths | Under five birth defects deaths |
|------|------|---------|---------|---------|-------|-------|-------|-----------|-----------|-----------|------------|-------------------------------|---------------------------------|---------------------------------|
| NOR  | 2000 | country | 4_Eur   | Norway  | 155   | 128   | 283   | 0.0026873 | 0.0022192 | 0.0049065 | 57679      | 61                            | 44                              | 105                             |
| NOR  | 2001 | country | 4_Eur   | Norway  | 149   | 124   | 273   | 0.002604  | 0.0021671 | 0.0047711 | 57219      | 56                            | 45                              | 101                             |
| NOR  | 2002 | country | 4_Eur   | Norway  | 144   | 118   | 262   | 0.0025179 | 0.0020633 | 0.0045811 | 57191      | 55                            | 35                              | 90                              |
| NOR  | 2003 | country | 4_Eur   | Norway  | 139   | 113   | 252   | 0.002424  | 0.0019706 | 0.0043946 | 57343      | 40                            | 30                              | 71                              |
| NOR  | 2004 | country | 4_Eur   | Norway  | 135   | 107   | 242   | 0.0023419 | 0.0018561 | 0.004198  | 57647      | 57                            | 41                              | 98                              |
| NOR  | 2005 | country | 4_Eur   | Norway  | 131   | 103   | 234   | 0.0022511 | 0.0017699 | 0.004021  | 58194      | 36                            | 34                              | 70                              |
| NOR  | 2006 | country | 4_Eur   | Norway  | 128   | 98    | 226   | 0.0021718 | 0.0016628 | 0.0038345 | 58938      | 37                            | 28                              | 65                              |
| NOR  | 2007 | country | 4_Eur   | Norway  | 125   | 94    | 219   | 0.0021026 | 0.0015811 | 0.0036837 | 59451      | 37                            | 25                              | 62                              |
| NOR  | 2008 | country | 4_Eur   | Norway  | 121   | 91    | 212   | 0.0020311 | 0.0015275 | 0.0035586 | 59574      | 37                            | 29                              | 66                              |
| NOR  | 2009 | country | 4_Eur   | Norway  | 117   | 87    | 204   | 0.0019445 | 0.0014459 | 0.0033905 | 60168      | 35                            | 25                              | 61                              |
| NOR  | 2010 | country | 4_Eur   | Norway  | 112   | 84    | 196   | 0.001864  | 0.001398  | 0.0032619 | 60087      | 38                            | 28                              | 66                              |
| NOR  | 2011 | country | 4_Eur   | Norway  | 108   | 80    | 188   | 0.0017961 | 0.0013304 | 0.0031266 | 60130      | 38                            | 27                              | 65                              |
| NOR  | 2012 | country | 4_Eur   | Norway  | 104   | 76    | 180   | 0.0017407 | 0.001272  | 0.0030127 | 59747      | 35                            | 19                              | 54                              |
| NOR  | 2013 | country | 4_Eur   | Norway  | 101   | 72    | 173   | 0.0016909 | 0.0012054 | 0.0028964 | 59730      | 28                            | 27                              | 55                              |
| NOR  | 2014 | country | 4_Eur   | Norway  | 97    | 70    | 167   | 0.0016414 | 0.0011845 | 0.0028259 | 59097      | 29                            | 15                              | 44                              |
| NOR  | 2015 | country | 4_Eur   | Norway  | 94    | 67    | 161   | 0.0015908 | 0.0011339 | 0.0027248 | 59088      | 35                            | 21                              | 56                              |
| NOR  | 2016 | country | 4_Eur   | Norway  | 91    | 65    | 156   | 0.0015451 | 0.0011036 | 0.0026487 | 58897      | 29                            | 22                              | 51                              |
| NOR  | 2017 | country | 4_Eur   | Norway  | 88    | 64    | 152   | 0.0014868 | 0.0010813 | 0.002568  | 59189      | 29                            | 18                              | 47                              |
| NOR  | 2018 | country | 4_Eur   | Norway  | 86    | 62    | 148   | 0.0014497 | 0.0010452 | 0.0024949 | 59321      | 29                            | 18                              | 47                              |
| NOR  | 2019 | country | 4_Eur   | Norway  | 83    | 62    | 145   | 0.001398  | 0.0010443 | 0.0024424 | 59369      | 27                            | 18                              | 45                              |
| NPL  | 2000 | country | 3_Sear  | Nepal   | 30395 | 32054 | 62449 | 0.0403709 | 0.0425741 | 0.0829449 | 752894     | 1779                          | 517                             | 2295                            |
| NPL  | 2001 | country | 3_Sear  | Nepal   | 28702 | 31104 | 59806 | 0.0388884 | 0.0421427 | 0.081031  | 738062     | 1755                          | 526                             | 2282                            |
| NPL  | 2002 | country | 3_Sear  | Nepal   | 27002 | 28035 | 55037 | 0.0374269 | 0.0388586 | 0.0762855 | 721459     | 1728                          | 531                             | 2258                            |
| NPL  | 2003 | country | 3_Sear  | Nepal   | 25338 | 28226 | 53564 | 0.035981  | 0.0400818 | 0.0760628 | 704204     | 1694                          | 582                             | 2277                            |
| NPL  | 2004 | country | 3_Sear  | Nepal   | 23802 | 26692 | 50494 | 0.0346411 | 0.0388473 | 0.0734883 | 687104     | 1662                          | 548                             | 2210                            |
| NPL  | 2005 | country | 3_Sear  | Nepal   | 22336 | 20064 | 42400 | 0.0332969 | 0.0299103 | 0.0632072 | 670813     | 1627                          | 549                             | 2176                            |
| NPL  | 2006 | country | 3_Sear  | Nepal   | 20995 | 17401 | 38396 | 0.032016  | 0.0265361 | 0.0585521 | 655765     | 1596                          | 693                             | 2289                            |
| NPL  | 2007 | country | 3_Sear  | Nepal   | 19779 | 15997 | 35776 | 0.030814  | 0.0249216 | 0.0557356 | 641884     | 1568                          | 611                             | 2180                            |
| NPL  | 2008 | country | 3_Sear  | Nepal   | 18642 | 14857 | 33499 | 0.0296315 | 0.0236146 | 0.0532461 | 629127     | 1543                          | 565                             | 2108                            |
| NPL  | 2009 | country | 3_Sear  | Nepal   | 17588 | 13112 | 30700 | 0.0284771 | 0.0212302 | 0.0497073 | 617619     | 1520                          | 711                             | 2231                            |
| NPL  | 2010 | country | 3_Sear  | Nepal   | 16603 | 12131 | 28734 | 0.0273313 | 0.0199697 | 0.047301  | 607471     | 1498                          | 641                             | 2139                            |
| NPL  | 2011 | country | 3_Sear  | Nepal   | 15694 | 11408 | 27102 | 0.0262211 | 0.0190598 | 0.0452809 | 598526     | 1480                          | 669                             | 2148                            |
| NPL  | 2012 | country | 3_Sear  | Nepal   | 14861 | 10875 | 25736 | 0.0251631 | 0.0184145 | 0.0435776 | 590588     | 1463                          | 630                             | 2092                            |
| NPL  | 2013 | country | 3_Sear  | Nepal   | 14109 | 9179  | 23288 | 0.0241796 | 0.0157304 | 0.03991   | 583508     | 1448                          | 639                             | 2087                            |
| NPL  | 2014 | country | 3_Sear  | Nepal   | 13429 | 8502  | 21931 | 0.0232666 | 0.0147303 | 0.0379969 | 577180     | 1434                          | 613                             | 2048                            |
| NPL  | 2015 | country | 3_Sear  | Nepal   | 12827 | 7945  | 20772 | 0.0224325 | 0.0138943 | 0.0363268 | 571806     | 1425                          | 555                             | 1980                            |
| NPL  | 2016 | country | 3_Sear  | Nepal   | 12299 | 7429  | 19728 | 0.0216644 | 0.0130859 | 0.0347503 | 567706     | 1418                          | 527                             | 1945                            |
| NPL  | 2017 | country | 3_Sear  | Nepal   | 11847 | 6918  | 18765 | 0.0209684 | 0.0122437 | 0.0332121 | 564992     | 1415                          | 573                             | 1988                            |
| NPL  | 2018 | country | 3_Sear  | Nepal   | 11470 | 6515  | 17985 | 0.0203591 | 0.0115642 | 0.0319233 | 563385     | 1407                          | 543                             | 1950                            |
| NPL  | 2019 | country | 3_Sear  | Nepal   | 11128 | 6176  | 17304 | 0.0197799 | 0.0109772 | 0.0307572 | 562590     | 1393                          | 536                             | 1930                            |

| iso3 | year | level   | whoreg6 | whoname     | nnd | pnd | u5d | nmr       | pnmr      | u5mr      | Livebirths | Neonatal birth defects deaths | 1-59 month birth defects deaths | Under five birth defects deaths |
|------|------|---------|---------|-------------|-----|-----|-----|-----------|-----------|-----------|------------|-------------------------------|---------------------------------|---------------------------------|
| NRU  | 2000 | country | 6_Wpr   | Nauru       | 8   | 6   | 14  | 0.0244658 | 0.0183493 | 0.0428151 | 327        | 1                             | 0                               | 1                               |
| NRU  | 2001 | country | 6_Wpr   | Nauru       | 8   | 5   | 13  | 0.02421   | 0.0151313 | 0.0393413 | 330        | 1                             | 1                               | 2                               |
| NRU  | 2002 | country | 6_Wpr   | Nauru       | 8   | 5   | 13  | 0.0240363 | 0.0150227 | 0.039059  | 333        | 1                             | 0                               | 1                               |
| NRU  | 2003 | country | 6_Wpr   | Nauru       | 7   | 5   | 12  | 0.02394   | 0.0171    | 0.04104   | 292        | 1                             | 0                               | 1                               |
| NRU  | 2004 | country | 6_Wpr   | Nauru       | 7   | 5   | 12  | 0.0239144 | 0.0170817 | 0.0409962 | 293        | 1                             | 0                               | 1                               |
| NRU  | 2005 | country | 6_Wpr   | Nauru       | 7   | 5   | 12  | 0.0239548 | 0.0171106 | 0.0410654 | 292        | 1                             | 0                               | 1                               |
| NRU  | 2006 | country | 6_Wpr   | Nauru       | 7   | 5   | 12  | 0.0240389 | 0.0171707 | 0.0412096 | 291        | 1                             | 1                               | 1                               |
| NRU  | 2007 | country | 6_Wpr   | Nauru       | 7   | 5   | 12  | 0.0240998 | 0.0172142 | 0.041314  | 290        | 1                             | 1                               | 1                               |
| NRU  | 2008 | country | 6_Wpr   | Nauru       | 8   | 4   | 12  | 0.0241407 | 0.0120703 | 0.036211  | 331        | 1                             | 1                               | 1                               |
| NRU  | 2009 | country | 6_Wpr   | Nauru       | 8   | 4   | 12  | 0.024129  | 0.0120645 | 0.0361935 | 332        | 1                             | 1                               | 1                               |
| NRU  | 2010 | country | 6_Wpr   | Nauru       | 8   | 4   | 12  | 0.0239343 | 0.0119672 | 0.0359015 | 334        | 1                             | 1                               | 1                               |
| NRU  | 2011 | country | 6_Wpr   | Nauru       | 8   | 4   | 12  | 0.0236756 | 0.0118378 | 0.0355134 | 338        | 1                             | 1                               | 2                               |
| NRU  | 2012 | country | 6_Wpr   | Nauru       | 7   | 5   | 12  | 0.0233334 | 0.0166667 | 0.0400001 | 300        | 1                             | 1                               | 2                               |
| NRU  | 2013 | country | 6_Wpr   | Nauru       | 7   | 5   | 12  | 0.0229373 | 0.0163838 | 0.039321  | 305        | 1                             | 1                               | 2                               |
| NRU  | 2014 | country | 6_Wpr   | Nauru       | 7   | 4   | 11  | 0.0224587 | 0.0128336 | 0.0352923 | 312        | 1                             | 1                               | 1                               |
| NRU  | 2015 | country | 6_Wpr   | Nauru       | 7   | 4   | 11  | 0.0220226 | 0.0125844 | 0.034607  | 318        | 1                             | 1                               | 1                               |
| NRU  | 2016 | country | 6_Wpr   | Nauru       | 7   | 4   | 11  | 0.0215023 | 0.0122871 | 0.0337894 | 326        | 1                             | 1                               | 1                               |
| NRU  | 2017 | country | 6_Wpr   | Nauru       | 6   | 4   | 10  | 0.0210261 | 0.0140174 | 0.0350435 | 285        | 1                             | 1                               | 1                               |
| NRU  | 2018 | country | 6_Wpr   | Nauru       | 6   | 4   | 10  | 0.0204467 | 0.0136311 | 0.0340778 | 293        | 1                             | 1                               | 1                               |
| NRU  | 2019 | country | 6_Wpr   | Nauru       | 6   | 3   | 9   | 0.0199415 | 0.0099708 | 0.0299123 | 301        | 1                             | 0                               | 1                               |
| NZL  | 2000 | country | 6_Wpr   | New Zealand | 195 | 218 | 413 | 0.0034885 | 0.0039    | 0.0073885 | 55897      | 60                            | 59                              | 119                             |
| NZL  | 2001 | country | 6_Wpr   | New Zealand | 196 | 207 | 403 | 0.0034864 | 0.003682  | 0.0071684 | 56219      | 70                            | 43                              | 113                             |
| NZL  | 2002 | country | 6_Wpr   | New Zealand | 197 | 199 | 396 | 0.0034741 | 0.0035094 | 0.0069835 | 56705      | 53                            | 53                              | 107                             |
| NZL  | 2003 | country | 6_Wpr   | New Zealand | 195 | 197 | 392 | 0.003375  | 0.0034096 | 0.0067846 | 57778      | 48                            | 67                              | 114                             |
| NZL  | 2004 | country | 6_Wpr   | New Zealand | 192 | 198 | 390 | 0.0032488 | 0.0033503 | 0.0065991 | 59099      | 48                            | 60                              | 108                             |
| NZL  | 2005 | country | 6_Wpr   | New Zealand | 188 | 203 | 391 | 0.0031242 | 0.0033735 | 0.0064977 | 60176      | 52                            | 45                              | 97                              |
| NZL  | 2006 | country | 6_Wpr   | New Zealand | 183 | 209 | 392 | 0.002982  | 0.0034057 | 0.0063878 | 61367      | 61                            | 54                              | 115                             |
| NZL  | 2007 | country | 6_Wpr   | New Zealand | 181 | 213 | 394 | 0.0028942 | 0.0034059 | 0.0063    | 62539      | 54                            | 48                              | 103                             |
| NZL  | 2008 | country | 6_Wpr   | New Zealand | 186 | 208 | 394 | 0.0029527 | 0.0033019 | 0.0062546 | 62994      | 53                            | 43                              | 97                              |
| NZL  | 2009 | country | 6_Wpr   | New Zealand | 196 | 196 | 392 | 0.0030975 | 0.0030975 | 0.006195  | 63277      | 53                            | 47                              | 101                             |
| NZL  | 2010 | country | 6_Wpr   | New Zealand | 205 | 182 | 387 | 0.0032403 | 0.0028768 | 0.0061171 | 63265      | 58                            | 35                              | 93                              |
| NZL  | 2011 | country | 6_Wpr   | New Zealand | 209 | 171 | 380 | 0.0033334 | 0.0027273 | 0.0060607 | 62699      | 62                            | 42                              | 104                             |
| NZL  | 2012 | country | 6_Wpr   | New Zealand | 208 | 162 | 370 | 0.0033385 | 0.0026002 | 0.0059387 | 62303      | 64                            | 33                              | 97                              |
| NZL  | 2013 | country | 6_Wpr   | New Zealand | 204 | 154 | 358 | 0.0033232 | 0.0025087 | 0.0058319 | 61386      | 64                            | 27                              | 91                              |
| NZL  | 2014 | country | 6_Wpr   | New Zealand | 197 | 149 | 346 | 0.0032257 | 0.0024397 | 0.0056654 | 61072      | 57                            | 20                              | 77                              |
| NZL  | 2015 | country | 6_Wpr   | New Zealand | 189 | 143 | 332 | 0.0031305 | 0.0023686 | 0.0054991 | 60374      | 57                            | 25                              | 82                              |
| NZL  | 2016 | country | 6_Wpr   | New Zealand | 180 | 138 | 318 | 0.0029886 | 0.0022912 | 0.0052798 | 60229      | 54                            | 24                              | 78                              |
| NZL  | 2017 | country | 6_Wpr   | New Zealand | 171 | 134 | 305 | 0.0028641 | 0.0022444 | 0.0051085 | 59705      | 51                            | 23                              | 74                              |
| NZL  | 2018 | country | 6_Wpr   | New Zealand | 163 | 131 | 294 | 0.002732  | 0.0021957 | 0.0049277 | 59663      | 49                            | 23                              | 71                              |
| NZL  | 2019 | country | 6_Wpr   | New Zealand | 157 | 126 | 283 | 0.0026374 | 0.0021167 | 0.0047541 | 59528      | 47                            | 22                              | 69                              |

| iso3 | year | level   | whoreg6 | whoname  | nnd    | pnd    | u5d    | nmr       | pnmr      | u5mr      | Livebirths | Neonatal birth defects deaths | 1-59 month birth defects deaths | Under five birth defects deaths |
|------|------|---------|---------|----------|--------|--------|--------|-----------|-----------|-----------|------------|-------------------------------|---------------------------------|---------------------------------|
| OMN  | 2000 | country | 5_Emr   | Oman     | 421    | 511    | 932    | 0.0075534 | 0.0091681 | 0.0167215 | 55737      | 106                           | 176                             | 281                             |
| OMN  | 2001 | country | 5_Emr   | Oman     | 387    | 468    | 855    | 0.0070906 | 0.0085747 | 0.0156653 | 54579      | 101                           | 165                             | 265                             |
| OMN  | 2002 | country | 5_Emr   | Oman     | 361    | 432    | 793    | 0.0066943 | 0.0080109 | 0.0147052 | 53927      | 96                            | 155                             | 251                             |
| OMN  | 2003 | country | 5_Emr   | Oman     | 343    | 405    | 748    | 0.0063737 | 0.0075258 | 0.0138994 | 53815      | 91                            | 148                             | 239                             |
| OMN  | 2004 | country | 5_Emr   | Oman     | 332    | 385    | 717    | 0.0061285 | 0.0071068 | 0.0132353 | 54173      | 92                            | 142                             | 234                             |
| OMN  | 2005 | country | 5_Emr   | Oman     | 327    | 374    | 701    | 0.0059075 | 0.0067566 | 0.0126641 | 55353      | 90                            | 140                             | 230                             |
| OMN  | 2006 | country | 5_Emr   | Oman     | 329    | 368    | 697    | 0.0057676 | 0.0064514 | 0.012219  | 57042      | 89                            | 139                             | 228                             |
| OMN  | 2007 | country | 5_Emr   | Oman     | 335    | 370    | 705    | 0.0056348 | 0.0062235 | 0.0118582 | 59452      | 93                            | 141                             | 234                             |
| OMN  | 2008 | country | 5_Emr   | Oman     | 345    | 376    | 721    | 0.0055551 | 0.0060542 | 0.0116093 | 62105      | 95                            | 144                             | 238                             |
| OMN  | 2009 | country | 5_Emr   | Oman     | 357    | 388    | 745    | 0.0054717 | 0.0059468 | 0.0114185 | 65245      | 96                            | 150                             | 245                             |
| OMN  | 2010 | country | 5_Emr   | Oman     | 371    | 401    | 772    | 0.0053971 | 0.0058335 | 0.0112306 | 68741      | 100                           | 156                             | 256                             |
| OMN  | 2011 | country | 5_Emr   | Oman     | 386    | 417    | 803    | 0.0053381 | 0.0057668 | 0.0111049 | 72310      | 103                           | 164                             | 267                             |
| OMN  | 2012 | country | 5_Emr   | Oman     | 402    | 433    | 835    | 0.0052759 | 0.0056828 | 0.0109587 | 76195      | 106                           | 171                             | 277                             |
| OMN  | 2013 | country | 5_Emr   | Oman     | 417    | 452    | 869    | 0.0052144 | 0.0056521 | 0.0108664 | 79971      | 109                           | 179                             | 288                             |
| OMN  | 2014 | country | 5_Emr   | Oman     | 433    | 470    | 903    | 0.0051839 | 0.0056268 | 0.0108107 | 83528      | 111                           | 187                             | 298                             |
| OMN  | 2015 | country | 5_Emr   | Oman     | 448    | 492    | 940    | 0.005171  | 0.0056789 | 0.0108499 | 86637      | 115                           | 196                             | 311                             |
| OMN  | 2016 | country | 5_Emr   | Oman     | 462    | 514    | 976    | 0.0051858 | 0.0057695 | 0.0109554 | 89089      | 118                           | 205                             | 322                             |
| OMN  | 2017 | country | 5_Emr   | Oman     | 472    | 534    | 1006   | 0.005216  | 0.0059011 | 0.0111171 | 90491      | 121                           | 213                             | 334                             |
| OMN  | 2018 | country | 5_Emr   | Oman     | 478    | 549    | 1027   | 0.005246  | 0.0060252 | 0.0112711 | 91118      | 124                           | 219                             | 343                             |
| OMN  | 2019 | country | 5_Emr   | Oman     | 477    | 557    | 1034   | 0.0052435 | 0.0061229 | 0.0113664 | 90970      | 123                           | 222                             | 344                             |
| PAK  | 2000 | country | 5_Emr   | Pakistan | 280411 | 239835 | 520246 | 0.0569059 | 0.0486715 | 0.1055774 | 4927630    | 14546                         | 6355                            | 20900                           |
| PAK  | 2001 | country | 5_Emr   | Pakistan | 276845 | 234325 | 511170 | 0.0558695 | 0.0472886 | 0.1031581 | 4955205    | 14838                         | 6834                            | 21672                           |
| PAK  | 2002 | country | 5_Emr   | Pakistan | 273833 | 228503 | 502336 | 0.0549381 | 0.0458436 | 0.1007818 | 4984388    | 15166                         | 7139                            | 22305                           |
| PAK  | 2003 | country | 5_Emr   | Pakistan | 271289 | 224073 | 495362 | 0.0540792 | 0.0446671 | 0.0987463 | 5016512    | 15513                         | 7613                            | 23126                           |
| PAK  | 2004 | country | 5_Emr   | Pakistan | 269379 | 218005 | 487384 | 0.0533103 | 0.0431434 | 0.0964537 | 5053035    | 15885                         | 7931                            | 23816                           |
| PAK  | 2005 | country | 5_Emr   | Pakistan | 268446 | 212800 | 481246 | 0.0526849 | 0.041764  | 0.0944489 | 5095309    | 16300                         | 7618                            | 23917                           |
| PAK  | 2006 | country | 5_Emr   | Pakistan | 267803 | 208348 | 476151 | 0.0520592 | 0.0405014 | 0.0925606 | 5144204    | 16735                         | 7341                            | 24076                           |
| PAK  | 2007 | country | 5_Emr   | Pakistan | 267951 | 204455 | 472406 | 0.0515361 | 0.0393237 | 0.0908598 | 5199291    | 17225                         | 7093                            | 24318                           |
| PAK  | 2008 | country | 5_Emr   | Pakistan | 268460 | 198642 | 467102 | 0.0510387 | 0.0377652 | 0.088804  | 5259928    | 17770                         | 7055                            | 24825                           |
| PAK  | 2009 | country | 5_Emr   | Pakistan | 269195 | 193223 | 462418 | 0.0505459 | 0.0362809 | 0.0868268 | 5325753    | 18345                         | 7224                            | 25569                           |
| PAK  | 2010 | country | 5_Emr   | Pakistan | 269460 | 192758 | 462218 | 0.0499242 | 0.0357132 | 0.0856375 | 5397377    | 18892                         | 7535                            | 26427                           |
| PAK  | 2011 | country | 5_Emr   | Pakistan | 268904 | 188159 | 457063 | 0.0491101 | 0.0343637 | 0.0834737 | 5475537    | 19384                         | 8043                            | 27427                           |
| PAK  | 2012 | country | 5_Emr   | Pakistan | 267877 | 182328 | 450205 | 0.0481866 | 0.0327977 | 0.0809842 | 5559164    | 19878                         | 8953                            | 28831                           |
| PAK  | 2013 | country | 5_Emr   | Pakistan | 266653 | 183318 | 449971 | 0.0472298 | 0.0324694 | 0.0796991 | 5645865    | 20399                         | 10887                           | 31286                           |
| PAK  | 2014 | country | 5_Emr   | Pakistan | 265067 | 172472 | 437539 | 0.046239  | 0.0300864 | 0.0763254 | 5732545    | 20945                         | 11803                           | 32748                           |
| PAK  | 2015 | country | 5_Emr   | Pakistan | 262925 | 167589 | 430514 | 0.0452175 | 0.0288218 | 0.0740392 | 5814680    | 21476                         | 13073                           | 34549                           |
| PAK  | 2016 | country | 5_Emr   | Pakistan | 260351 | 164287 | 424638 | 0.0442208 | 0.0279042 | 0.072125  | 5887530    | 21993                         | 13164                           | 35157                           |
| PAK  | 2017 | country | 5_Emr   | Pakistan | 256984 | 160584 | 417568 | 0.0432054 | 0.0269981 | 0.0702034 | 5947964    | 22415                         | 13524                           | 35939                           |
| PAK  | 2018 | country | 5_Emr   | Pakistan | 252868 | 166195 | 419063 | 0.0421862 | 0.0277264 | 0.0699126 | 5994098    | 22598                         | 13711                           | 36309                           |
| PAK  | 2019 | country | 5_Emr   | Pakistan | 248342 | 150176 | 398518 | 0.0412171 | 0.0249246 | 0.0661416 | 6025224    | 22605                         | 13546                           | 36150                           |

| iso3 | year | level   | whoreg6 | whoname | nnd  | pnd   | u5d   | nmr       | pnmr      | u5mr      | Livebirths | Neonatal birth defects deaths | 1-59 month birth defects deaths | Under five birth defects deaths |
|------|------|---------|---------|---------|------|-------|-------|-----------|-----------|-----------|------------|-------------------------------|---------------------------------|---------------------------------|
| PAN  | 2000 | country | 2_Amr   | Panama  | 1080 | 746   | 1826  | 0.015198  | 0.0104979 | 0.0256959 | 71062      | 310                           | 191                             | 501                             |
| PAN  | 2001 | country | 2_Amr   | Panama  | 1062 | 735   | 1797  | 0.0148579 | 0.010283  | 0.0251409 | 71477      | 262                           | 200                             | 461                             |
| PAN  | 2002 | country | 2_Amr   | Panama  | 1040 | 723   | 1763  | 0.0144602 | 0.0100526 | 0.0245127 | 71922      | 272                           | 239                             | 511                             |
| PAN  | 2003 | country | 2_Amr   | Panama  | 1019 | 710   | 1729  | 0.0140836 | 0.0098129 | 0.0238965 | 72354      | 293                           | 210                             | 503                             |
| PAN  | 2004 | country | 2_Amr   | Panama  | 998  | 699   | 1697  | 0.013704  | 0.0095983 | 0.0233023 | 72825      | 303                           | 185                             | 488                             |
| PAN  | 2005 | country | 2_Amr   | Panama  | 981  | 684   | 1665  | 0.0133605 | 0.0093156 | 0.0226761 | 73425      | 297                           | 118                             | 414                             |
| PAN  | 2006 | country | 2_Amr   | Panama  | 964  | 671   | 1635  | 0.0130107 | 0.0090562 | 0.0220669 | 74093      | 239                           | 195                             | 434                             |
| PAN  | 2007 | country | 2_Amr   | Panama  | 944  | 661   | 1605  | 0.0126189 | 0.0088359 | 0.0214548 | 74808      | 263                           | 126                             | 388                             |
| PAN  | 2008 | country | 2_Amr   | Panama  | 925  | 648   | 1573  | 0.0122572 | 0.0085866 | 0.0208438 | 75466      | 285                           | 162                             | 447                             |
| PAN  | 2009 | country | 2_Amr   | Panama  | 905  | 639   | 1544  | 0.01187   | 0.0083811 | 0.0202511 | 76243      | 247                           | 136                             | 383                             |
| PAN  | 2010 | country | 2_Amr   | Panama  | 883  | 631   | 1514  | 0.0114814 | 0.0082047 | 0.0196861 | 76907      | 272                           | 112                             | 384                             |
| PAN  | 2011 | country | 2_Amr   | Panama  | 862  | 619   | 1481  | 0.0111179 | 0.0079838 | 0.0191017 | 77532      | 244                           | 149                             | 393                             |
| PAN  | 2012 | country | 2_Amr   | Panama  | 841  | 603   | 1444  | 0.0107759 | 0.0077264 | 0.0185023 | 78045      | 231                           | 161                             | 391                             |
| PAN  | 2013 | country | 2_Amr   | Panama  | 820  | 590   | 1410  | 0.0104511 | 0.0075197 | 0.0179708 | 78461      | 191                           | 146                             | 337                             |
| PAN  | 2014 | country | 2_Amr   | Panama  | 796  | 575   | 1371  | 0.0101205 | 0.0073107 | 0.0174311 | 78652      | 194                           | 188                             | 382                             |
| PAN  | 2015 | country | 2_Amr   | Panama  | 773  | 556   | 1329  | 0.0097963 | 0.0070463 | 0.0168426 | 78907      | 233                           | 157                             | 390                             |
| PAN  | 2016 | country | 2_Amr   | Panama  | 750  | 542   | 1292  | 0.0094907 | 0.0068586 | 0.0163494 | 79025      | 210                           | 167                             | 377                             |
| PAN  | 2017 | country | 2_Amr   | Panama  | 723  | 530   | 1253  | 0.0091395 | 0.0066998 | 0.0158392 | 79107      | 199                           | 162                             | 361                             |
| PAN  | 2018 | country | 2_Amr   | Panama  | 702  | 508   | 1210  | 0.0088644 | 0.0064147 | 0.0152791 | 79193      | 201                           | 155                             | 356                             |
| PAN  | 2019 | country | 2_Amr   | Panama  | 680  | 495   | 1175  | 0.0085703 | 0.0062387 | 0.014809  | 79344      | 191                           | 151                             | 342                             |
| PER  | 2000 | country | 2_Amr   | Peru    | 9793 | 13966 | 23759 | 0.0159252 | 0.0227113 | 0.0386365 | 614937     | 1196                          | 2461                            | 3657                            |
| PER  | 2001 | country | 2_Amr   | Peru    | 9220 | 12590 | 21810 | 0.0150519 | 0.0205536 | 0.0356055 | 612546     | 1194                          | 2303                            | 3497                            |
| PER  | 2002 | country | 2_Amr   | Peru    | 8780 | 11369 | 20149 | 0.0143402 | 0.0185688 | 0.032909  | 612264     | 1220                          | 1840                            | 3059                            |
| PER  | 2003 | country | 2_Amr   | Peru    | 8438 | 10285 | 18723 | 0.0137501 | 0.0167598 | 0.0305099 | 613670     | 1248                          | 1507                            | 2754                            |
| PER  | 2004 | country | 2_Amr   | Peru    | 8105 | 9405  | 17510 | 0.0131518 | 0.0152613 | 0.0284132 | 616264     | 1259                          | 1171                            | 2430                            |
| PER  | 2005 | country | 2_Amr   | Peru    | 7680 | 8762  | 16442 | 0.0124102 | 0.0141586 | 0.0265689 | 618845     | 1272                          | 1047                            | 2319                            |
| PER  | 2006 | country | 2_Amr   | Peru    | 7276 | 8193  | 15469 | 0.0117367 | 0.0132159 | 0.0249527 | 619934     | 1284                          | 1035                            | 2319                            |
| PER  | 2007 | country | 2_Amr   | Peru    | 6875 | 7683  | 14558 | 0.0111127 | 0.0124187 | 0.0235313 | 618664     | 1272                          | 1053                            | 2325                            |
| PER  | 2008 | country | 2_Amr   | Peru    | 6480 | 7201  | 13681 | 0.0105438 | 0.0111717 | 0.0222608 | 614577     | 1241                          | 1068                            | 2309                            |
| PER  | 2009 | country | 2_Amr   | Peru    | 6098 | 6739  | 12837 | 0.0100342 | 0.011089  | 0.0211232 | 607719     | 1205                          | 1073                            | 2278                            |
| PER  | 2010 | country | 2_Amr   | Peru    | 5728 | 6303  | 12031 | 0.0095635 | 0.0105235 | 0.020087  | 598943     | 1158                          | 1072                            | 2229                            |
| PER  | 2011 | country | 2_Amr   | Peru    | 5379 | 5895  | 11274 | 0.0091239 | 0.0099991 | 0.019123  | 589553     | 1145                          | 1062                            | 2207                            |
| PER  | 2012 | country | 2_Amr   | Peru    | 5062 | 5526  | 10588 | 0.0087106 | 0.009509  | 0.0182195 | 581134     | 1087                          | 1049                            | 2137                            |
| PER  | 2013 | country | 2_Amr   | Peru    | 4777 | 5201  | 9978  | 0.0083122 | 0.00905   | 0.0173622 | 574698     | 1013                          | 1034                            | 2047                            |
| PER  | 2014 | country | 2_Amr   | Peru    | 4529 | 4907  | 9436  | 0.0079352 | 0.0085975 | 0.0165326 | 570750     | 995                           | 1022                            | 2017                            |
| PER  | 2015 | country | 2_Amr   | Peru    | 4311 | 4646  | 8957  | 0.0075722 | 0.0081607 | 0.0157329 | 569316     | 955                           | 1010                            | 1965                            |
| PER  | 2016 | country | 2_Amr   | Peru    | 4121 | 4415  | 8536  | 0.0072316 | 0.0077475 | 0.0149792 | 569858     | 939                           | 1000                            | 1939                            |
| PER  | 2017 | country | 2_Amr   | Peru    | 3952 | 4226  | 8178  | 0.0069139 | 0.0073933 | 0.0143072 | 571601     | 880                           | 987                             | 1867                            |
| PER  | 2018 | country | 2_Amr   | Peru    | 3796 | 4055  | 7851  | 0.0066213 | 0.007073  | 0.0136943 | 573304     | 853                           | 977                             | 1830                            |
| PER  | 2019 | country | 2_Amr   | Peru    | 3653 | 3910  | 7563  | 0.0063578 | 0.0068051 | 0.0131628 | 574573     | 837                           | 973                             | 1810                            |

| iso3 | year | level   | whoreg6 | whoname     | nnd   | pnd   | u5d   | nmr       | pnmr      | u5mr      | Livebirths | Neonatal birth defects deaths | 1-59 month birth defects deaths | Under five birth defects deaths |
|------|------|---------|---------|-------------|-------|-------|-------|-----------|-----------|-----------|------------|-------------------------------|---------------------------------|---------------------------------|
| PHL  | 2000 | country | 6_Wpr   | Philippines | 37714 | 47609 | 85323 | 0.016317  | 0.0205981 | 0.0369151 | 2311332    | 3896                          | 3980                            | 7876                            |
| PHL  | 2001 | country | 6_Wpr   | Philippines | 37852 | 46965 | 84817 | 0.0162195 | 0.0201244 | 0.0363439 | 2333730    | 3980                          | 4225                            | 8205                            |
| PHL  | 2002 | country | 6_Wpr   | Philippines | 37863 | 46440 | 84303 | 0.0161147 | 0.0197651 | 0.0358798 | 2349594    | 4017                          | 4288                            | 8306                            |
| PHL  | 2003 | country | 6_Wpr   | Philippines | 37692 | 45905 | 83597 | 0.0159823 | 0.0194649 | 0.0354473 | 2358353    | 4095                          | 4731                            | 8826                            |
| PHL  | 2004 | country | 6_Wpr   | Philippines | 37415 | 44791 | 82206 | 0.0158512 | 0.0189763 | 0.0348275 | 2360386    | 4157                          | 5187                            | 9344                            |
| PHL  | 2005 | country | 6_Wpr   | Philippines | 36991 | 43245 | 80236 | 0.0156888 | 0.0183411 | 0.0340299 | 2357796    | 4227                          | 6948                            | 11175                           |
| PHL  | 2006 | country | 6_Wpr   | Philippines | 36564 | 42245 | 78809 | 0.0155333 | 0.0179467 | 0.03348   | 2353918    | 4280                          | 4723                            | 9003                            |
| PHL  | 2007 | country | 6_Wpr   | Philippines | 36150 | 41311 | 77461 | 0.0153736 | 0.0175683 | 0.032942  | 2351428    | 4237                          | 4523                            | 8761                            |
| PHL  | 2008 | country | 6_Wpr   | Philippines | 35822 | 40344 | 76166 | 0.0152313 | 0.0171754 | 0.0323852 | 2351871    | 4302                          | 4366                            | 8668                            |
| PHL  | 2009 | country | 6_Wpr   | Philippines | 35574 | 39613 | 75187 | 0.0151057 | 0.0168208 | 0.0319265 | 2354999    | 4330                          | 3949                            | 8279                            |
| PHL  | 2010 | country | 6_Wpr   | Philippines | 35325 | 39133 | 74458 | 0.0149811 | 0.0165961 | 0.0315772 | 2357972    | 4402                          | 3404                            | 7806                            |
| PHL  | 2011 | country | 6_Wpr   | Philippines | 35030 | 38658 | 73688 | 0.0148646 | 0.016404  | 0.0312687 | 2356601    | 4461                          | 3785                            | 8246                            |
| PHL  | 2012 | country | 6_Wpr   | Philippines | 34638 | 37733 | 72371 | 0.0147562 | 0.0160748 | 0.0308309 | 2347359    | 4451                          | 3777                            | 8227                            |
| PHL  | 2013 | country | 6_Wpr   | Philippines | 34100 | 37082 | 71182 | 0.0146424 | 0.0159229 | 0.0305653 | 2328855    | 4440                          | 3815                            | 8256                            |
| PHL  | 2014 | country | 6_Wpr   | Philippines | 33494 | 37471 | 70965 | 0.0145504 | 0.0162779 | 0.0308283 | 2301925    | 4468                          | 3390                            | 7857                            |
| PHL  | 2015 | country | 6_Wpr   | Philippines | 32738 | 35629 | 68367 | 0.0144228 | 0.0156964 | 0.0301193 | 2269877    | 4399                          | 3516                            | 7914                            |
| PHL  | 2016 | country | 6_Wpr   | Philippines | 31919 | 34379 | 66298 | 0.0142649 | 0.0153643 | 0.0296291 | 2237594    | 4361                          | 3428                            | 7789                            |
| PHL  | 2017 | country | 6_Wpr   | Philippines | 30894 | 33257 | 64151 | 0.0139785 | 0.0150475 | 0.029026  | 2210108    | 4312                          | 3225                            | 7537                            |
| PHL  | 2018 | country | 6_Wpr   | Philippines | 29908 | 32031 | 61939 | 0.0136495 | 0.0146186 | 0.028268  | 2191144    | 4265                          | 3106                            | 7371                            |
| PHL  | 2019 | country | 6_Wpr   | Philippines | 28992 | 31401 | 60393 | 0.0132875 | 0.0143916 | 0.0276791 | 2181896    | 4132                          | 3079                            | 7211                            |
| PLW  | 2000 | country | 6_Wpr   | Palau       | 5     | 4     | 9     | 0.0158535 | 0.0126828 | 0.0285363 | 315        | 1                             | 1                               | 1                               |
| PLW  | 2001 | country | 6_Wpr   | Palau       | 5     | 4     | 9     | 0.0154973 | 0.0123978 | 0.0278951 | 323        | 1                             | 1                               | 1                               |
| PLW  | 2002 | country | 6_Wpr   | Palau       | 5     | 3     | 8     | 0.0152046 | 0.0091228 | 0.0243273 | 329        | 1                             | 1                               | 1                               |
| PLW  | 2003 | country | 6_Wpr   | Palau       | 4     | 4     | 8     | 0.0149135 | 0.0149135 | 0.0298271 | 268        | 1                             | 1                               | 1                               |
| PLW  | 2004 | country | 6_Wpr   | Palau       | 4     | 4     | 8     | 0.0146158 | 0.0146158 | 0.0292315 | 274        | 1                             | 1                               | 1                               |
| PLW  | 2005 | country | 6_Wpr   | Palau       | 4     | 3     | 7     | 0.014304  | 0.010728  | 0.025032  | 280        | 1                             | 1                               | 1                               |
| PLW  | 2006 | country | 6_Wpr   | Palau       | 4     | 3     | 7     | 0.013989  | 0.0104917 | 0.0244807 | 286        | 1                             | 1                               | 1                               |
| PLW  | 2007 | country | 6_Wpr   | Palau       | 4     | 3     | 7     | 0.013656  | 0.010242  | 0.023898  | 293        | 1                             | 1                               | 1                               |
| PLW  | 2008 | country | 6_Wpr   | Palau       | 3     | 3     | 6     | 0.0132935 | 0.0132935 | 0.0265869 | 226        | 0                             | 1                               | 1                               |
| PLW  | 2009 | country | 6_Wpr   | Palau       | 3     | 3     | 6     | 0.0129188 | 0.0129188 | 0.0258375 | 232        | 0                             | 1                               | 1                               |
| PLW  | 2010 | country | 6_Wpr   | Palau       | 3     | 3     | 6     | 0.0125429 | 0.0125429 | 0.0250857 | 239        | 1                             | 1                               | 1                               |
| PLW  | 2011 | country | 6_Wpr   | Palau       | 3     | 3     | 6     | 0.0121594 | 0.0121594 | 0.0243189 | 247        | 1                             | 1                               | 1                               |
| PLW  | 2012 | country | 6_Wpr   | Palau       | 3     | 2     | 5     | 0.0118092 | 0.0078728 | 0.0196819 | 254        | 1                             | 0                               | 1                               |
| PLW  | 2013 | country | 6_Wpr   | Palau       | 3     | 2     | 5     | 0.0114303 | 0.0076202 | 0.0190505 | 262        | 1                             | 0                               | 1                               |
| PLW  | 2014 | country | 6_Wpr   | Palau       | 3     | 2     | 5     | 0.0110403 | 0.0073602 | 0.0184005 | 272        | 1                             | 0                               | 1                               |
| PLW  | 2015 | country | 6_Wpr   | Palau       | 3     | 2     | 5     | 0.010652  | 0.0071013 | 0.0177534 | 282        | 1                             | 0                               | 1                               |
| PLW  | 2016 | country | 6_Wpr   | Palau       | 3     | 2     | 5     | 0.0103061 | 0.0068707 | 0.0171768 | 291        | 1                             | 0                               | 1                               |
| PLW  | 2017 | country | 6_Wpr   | Palau       | 2     | 2     | 4     | 0.0099877 | 0.0099877 | 0.0199754 | 200        | 0                             | 0                               | 1                               |
| PLW  | 2018 | country | 6_Wpr   | Palau       | 2     | 2     | 4     | 0.0096437 | 0.0096437 | 0.0192875 | 207        | 0                             | 0                               | 1                               |
| PLW  | 2019 | country | 6_Wpr   | Palau       | 2     | 2     | 4     | 0.0093628 | 0.0093628 | 0.0187256 | 214        | 0                             | 1                               | 1                               |

| iso3 | year | level   | whoreg6 | whoname          | nnd  | pnd  | u5d   | nmr       | pnmr      | u5mr      | Livebirths | Neonatal birth defects deaths | 1-59 month birth defects deaths | Under five birth defects deaths |
|------|------|---------|---------|------------------|------|------|-------|-----------|-----------|-----------|------------|-------------------------------|---------------------------------|---------------------------------|
| PNG  | 2000 | country | 6_Wpr   | Papua New Guinea | 6091 | 8152 | 14243 | 0.0307319 | 0.0411301 | 0.071862  | 198198     | 406                           | 186                             | 592                             |
| PNG  | 2001 | country | 6_Wpr   | Papua New Guinea | 6050 | 8122 | 14172 | 0.0301356 | 0.0404559 | 0.0705915 | 200760     | 404                           | 174                             | 579                             |
| PNG  | 2002 | country | 6_Wpr   | Papua New Guinea | 6004 | 8896 | 14900 | 0.0295577 | 0.0437936 | 0.0733513 | 203128     | 417                           | 232                             | 649                             |
| PNG  | 2003 | country | 6_Wpr   | Papua New Guinea | 5963 | 8192 | 14155 | 0.0290378 | 0.0398904 | 0.0689282 | 205353     | 425                           | 249                             | 674                             |
| PNG  | 2004 | country | 6_Wpr   | Papua New Guinea | 5937 | 7553 | 13490 | 0.0286039 | 0.0363896 | 0.0649935 | 207559     | 427                           | 213                             | 640                             |
| PNG  | 2005 | country | 6_Wpr   | Papua New Guinea | 5918 | 7285 | 13203 | 0.0282232 | 0.0347445 | 0.0629677 | 209685     | 426                           | 280                             | 706                             |
| PNG  | 2006 | country | 6_Wpr   | Papua New Guinea | 5900 | 6937 | 12837 | 0.0278652 | 0.032764  | 0.0606292 | 211733     | 444                           | 283                             | 726                             |
| PNG  | 2007 | country | 6_Wpr   | Papua New Guinea | 5873 | 6859 | 12732 | 0.0274898 | 0.0321042 | 0.0595941 | 213643     | 445                           | 256                             | 701                             |
| PNG  | 2008 | country | 6_Wpr   | Papua New Guinea | 5838 | 6764 | 12602 | 0.0270976 | 0.031397  | 0.0584946 | 215444     | 448                           | 240                             | 688                             |
| PNG  | 2009 | country | 6_Wpr   | Papua New Guinea | 5782 | 6670 | 12452 | 0.0266272 | 0.0307166 | 0.0573438 | 217146     | 444                           | 208                             | 652                             |
| PNG  | 2010 | country | 6_Wpr   | Papua New Guinea | 5716 | 6517 | 12233 | 0.0261289 | 0.0297899 | 0.0559188 | 218762     | 448                           | 259                             | 707                             |
| PNG  | 2011 | country | 6_Wpr   | Papua New Guinea | 5643 | 6438 | 12081 | 0.0256108 | 0.0292169 | 0.0548277 | 220337     | 448                           | 304                             | 753                             |
| PNG  | 2012 | country | 6_Wpr   | Papua New Guinea | 5578 | 6312 | 11890 | 0.0251303 | 0.0284364 | 0.0535667 | 221964     | 450                           | 316                             | 765                             |
| PNG  | 2013 | country | 6_Wpr   | Papua New Guinea | 5516 | 6140 | 11656 | 0.0246679 | 0.02746   | 0.0521279 | 223611     | 464                           | 281                             | 745                             |
| PNG  | 2014 | country | 6_Wpr   | Papua New Guinea | 5452 | 6206 | 11658 | 0.0241942 | 0.0275395 | 0.0517337 | 225343     | 470                           | 267                             | 737                             |
| PNG  | 2015 | country | 6_Wpr   | Papua New Guinea | 5386 | 6011 | 11397 | 0.0237132 | 0.0264643 | 0.0501775 | 227131     | 466                           | 307                             | 772                             |
| PNG  | 2016 | country | 6_Wpr   | Papua New Guinea | 5335 | 5760 | 11095 | 0.0232924 | 0.025147  | 0.0484394 | 229045     | 461                           | 214                             | 675                             |
| PNG  | 2017 | country | 6_Wpr   | Papua New Guinea | 5276 | 5660 | 10936 | 0.0228335 | 0.0244948 | 0.0473284 | 231064     | 473                           | 172                             | 646                             |
| PNG  | 2018 | country | 6_Wpr   | Papua New Guinea | 5211 | 5567 | 10778 | 0.0223514 | 0.023877  | 0.0462284 | 233139     | 460                           | 161                             | 621                             |
| PNG  | 2019 | country | 6_Wpr   | Papua New Guinea | 5160 | 5369 | 10529 | 0.0219373 | 0.0228265 | 0.0447637 | 235216     | 456                           | 170                             | 626                             |
| POL  | 2000 | country | 4_Eur   | Poland           | 2179 | 1442 | 3621  | 0.0057584 | 0.0038108 | 0.0095692 | 378402     | 769                           | 547                             | 1316                            |
| POL  | 2001 | country | 4_Eur   | Poland           | 2014 | 1318 | 3332  | 0.0054365 | 0.0035578 | 0.0089943 | 370456     | 679                           | 506                             | 1185                            |
| POL  | 2002 | country | 4_Eur   | Poland           | 1913 | 1218 | 3131  | 0.0052115 | 0.0033182 | 0.0085297 | 367072     | 627                           | 464                             | 1091                            |
| POL  | 2003 | country | 4_Eur   | Poland           | 1843 | 1150 | 2993  | 0.0050078 | 0.0031248 | 0.0081325 | 368029     | 576                           | 441                             | 1017                            |
| POL  | 2004 | country | 4_Eur   | Poland           | 1786 | 1111 | 2897  | 0.0047936 | 0.0029819 | 0.0077755 | 372581     | 583                           | 443                             | 1026                            |
| POL  | 2005 | country | 4_Eur   | Poland           | 1740 | 1092 | 2832  | 0.0045884 | 0.0028796 | 0.0074679 | 379221     | 608                           | 414                             | 1022                            |
| POL  | 2006 | country | 4_Eur   | Poland           | 1698 | 1084 | 2782  | 0.0043932 | 0.0028046 | 0.0071979 | 386504     | 504                           | 408                             | 912                             |
| POL  | 2007 | country | 4_Eur   | Poland           | 1652 | 1069 | 2721  | 0.0042087 | 0.0027234 | 0.0069321 | 392521     | 543                           | 429                             | 971                             |
| POL  | 2008 | country | 4_Eur   | Poland           | 1590 | 1037 | 2627  | 0.0040146 | 0.0026183 | 0.0066329 | 396057     | 478                           | 382                             | 860                             |
| POL  | 2009 | country | 4_Eur   | Poland           | 1508 | 987  | 2495  | 0.0038003 | 0.0024873 | 0.0062876 | 396810     | 437                           | 418                             | 855                             |
| POL  | 2010 | country | 4_Eur   | Poland           | 1417 | 934  | 2351  | 0.0035896 | 0.002366  | 0.0059556 | 394754     | 462                           | 391                             | 854                             |
| POL  | 2011 | country | 4_Eur   | Poland           | 1327 | 895  | 2222  | 0.0033941 | 0.0022892 | 0.0056833 | 390972     | 422                           | 394                             | 816                             |
| POL  | 2012 | country | 4_Eur   | Poland           | 1247 | 865  | 2112  | 0.0032245 | 0.0022367 | 0.0054612 | 386730     | 393                           | 402                             | 795                             |
| POL  | 2013 | country | 4_Eur   | Poland           | 1183 | 830  | 2013  | 0.0030885 | 0.0021669 | 0.0052555 | 383030     | 406                           | 352                             | 758                             |
| POL  | 2014 | country | 4_Eur   | Poland           | 1133 | 789  | 1922  | 0.0029799 | 0.0020751 | 0.005055  | 380219     | 393                           | 347                             | 740                             |
| POL  | 2015 | country | 4_Eur   | Poland           | 1097 | 746  | 1843  | 0.0029018 | 0.0019734 | 0.0048752 | 378036     | 341                           | 352                             | 693                             |
| POL  | 2016 | country | 4_Eur   | Poland           | 1070 | 706  | 1776  | 0.0028434 | 0.0018761 | 0.0047195 | 376312     | 333                           | 323                             | 656                             |
| POL  | 2017 | country | 4_Eur   | Poland           | 1048 | 672  | 1720  | 0.0028006 | 0.0017958 | 0.0045965 | 374201     | 338                           | 307                             | 645                             |
| POL  | 2018 | country | 4_Eur   | Poland           | 1025 | 645  | 1670  | 0.0027606 | 0.0017372 | 0.0044978 | 371292     | 323                           | 295                             | 617                             |
| POL  | 2019 | country | 4_Eur   | Poland           | 997  | 627  | 1624  | 0.0027166 | 0.0017085 | 0.0044251 | 366999     | 316                           | 286                             | 602                             |

| iso3 | year | level   | whoreg6 | whoname           | nnd   | pnd   | u5d   | nmr       | pnmr      | u5mr      | Livebirths | Neonatal birth defects deaths | 1-59 month birth defects deaths | Under five birth defects deaths |
|------|------|---------|---------|-------------------|-------|-------|-------|-----------|-----------|-----------|------------|-------------------------------|---------------------------------|---------------------------------|
| PRK  | 2000 | country | 3_Sear  | Democratic People | 10858 | 14063 | 24921 | 0.0263189 | 0.0340876 | 0.0604065 | 412555     | 1162                          | 871                             | 2033                            |
| PRK  | 2001 | country | 3_Sear  | Democratic People | 9742  | 11559 | 21301 | 0.0240398 | 0.0285235 | 0.0525633 | 405245     | 1050                          | 1109                            | 2158                            |
| PRK  | 2002 | country | 3_Sear  | Democratic People | 8606  | 9346  | 17952 | 0.0216708 | 0.0235342 | 0.045205  | 397125     | 987                           | 1138                            | 2125                            |
| PRK  | 2003 | country | 3_Sear  | Democratic People | 7652  | 7664  | 15316 | 0.0197045 | 0.0197354 | 0.0394399 | 388338     | 887                           | 950                             | 1837                            |
| PRK  | 2004 | country | 3_Sear  | Democratic People | 6939  | 6550  | 13489 | 0.0182943 | 0.0172687 | 0.035563  | 379299     | 834                           | 856                             | 1690                            |
| PRK  | 2005 | country | 3_Sear  | Democratic People | 6500  | 5941  | 12441 | 0.0175433 | 0.0160345 | 0.0335778 | 370513     | 827                           | 850                             | 1677                            |
| PRK  | 2006 | country | 3_Sear  | Democratic People | 6268  | 5684  | 11952 | 0.0172901 | 0.0156791 | 0.0329692 | 362520     | 836                           | 829                             | 1665                            |
| PRK  | 2007 | country | 3_Sear  | Democratic People | 6133  | 5509  | 11642 | 0.0172419 | 0.0154876 | 0.0327295 | 355703     | 830                           | 838                             | 1669                            |
| PRK  | 2008 | country | 3_Sear  | Democratic People | 5983  | 5314  | 11297 | 0.0170789 | 0.0151692 | 0.0322481 | 350315     | 831                           | 805                             | 1636                            |
| PRK  | 2009 | country | 3_Sear  | Democratic People | 5803  | 5054  | 10857 | 0.0167421 | 0.0145812 | 0.0313233 | 346611     | 827                           | 784                             | 1610                            |
| PRK  | 2010 | country | 3_Sear  | Democratic People | 5575  | 4651  | 10226 | 0.0161816 | 0.0134997 | 0.0296813 | 344527     | 826                           | 769                             | 1595                            |
| PRK  | 2011 | country | 3_Sear  | Democratic People | 5247  | 4299  | 9546  | 0.0152481 | 0.0124932 | 0.0277413 | 344108     | 812                           | 763                             | 1576                            |
| PRK  | 2012 | country | 3_Sear  | Democratic People | 4887  | 3954  | 8841  | 0.0141721 | 0.0114664 | 0.0256385 | 344833     | 812                           | 773                             | 1584                            |
| PRK  | 2013 | country | 3_Sear  | Democratic People | 4555  | 3713  | 8268  | 0.0131516 | 0.0107205 | 0.023872  | 346347     | 796                           | 778                             | 1574                            |
| PRK  | 2014 | country | 3_Sear  | Democratic People | 4281  | 3463  | 7744  | 0.0122919 | 0.0099432 | 0.0222352 | 348277     | 782                           | 753                             | 1534                            |
| PRK  | 2015 | country | 3_Sear  | Democratic People | 4058  | 3272  | 7330  | 0.0115849 | 0.009341  | 0.020926  | 350282     | 797                           | 733                             | 1530                            |
| PRK  | 2016 | country | 3_Sear  | Democratic People | 3870  | 3114  | 6984  | 0.0109909 | 0.0088438 | 0.0198347 | 352110     | 792                           | 716                             | 1508                            |
| PRK  | 2017 | country | 3_Sear  | Democratic People | 3701  | 2968  | 6669  | 0.0104664 | 0.0083935 | 0.0188599 | 353607     | 786                           | 699                             | 1485                            |
| PRK  | 2018 | country | 3_Sear  | Democratic People | 3536  | 2879  | 6415  | 0.009969  | 0.0081168 | 0.0180858 | 354698     | 766                           | 691                             | 1458                            |
| PRK  | 2019 | country | 3_Sear  | Democratic People | 3376  | 2740  | 6116  | 0.0095032 | 0.0077129 | 0.0172161 | 355249     | 751                           | 673                             | 1424                            |
| PRT  | 2000 | country | 4_Eur   | Portugal          | 379   | 429   | 808   | 0.0033539 | 0.0037964 | 0.0071503 | 113002     | 109                           | 145                             | 253                             |
| PRT  | 2001 | country | 4_Eur   | Portugal          | 360   | 386   | 746   | 0.0031883 | 0.0034185 | 0.0066068 | 112913     | 105                           | 101                             | 207                             |
| PRT  | 2002 | country | 4_Eur   | Portugal          | 340   | 341   | 681   | 0.0030301 | 0.003039  | 0.0060691 | 112208     | 100                           | 73                              | 173                             |
| PRT  | 2003 | country | 4_Eur   | Portugal          | 314   | 303   | 617   | 0.0028135 | 0.002715  | 0.0055285 | 111604     | 93                            | 74                              | 167                             |
| PRT  | 2004 | country | 4_Eur   | Portugal          | 283   | 276   | 559   | 0.0025668 | 0.0025033 | 0.0050701 | 110255     | 82                            | 53                              | 135                             |
| PRT  | 2005 | country | 4_Eur   | Portugal          | 255   | 255   | 510   | 0.0023429 | 0.0023429 | 0.0046859 | 108838     | 77                            | 25                              | 101                             |
| PRT  | 2006 | country | 4_Eur   | Portugal          | 234   | 239   | 473   | 0.0021952 | 0.0022421 | 0.0044372 | 106598     | 70                            | 26                              | 96                              |
| PRT  | 2007 | country | 4_Eur   | Portugal          | 220   | 223   | 443   | 0.0021083 | 0.0021371 | 0.0042454 | 104348     | 67                            | 27                              | 94                              |
| PRT  | 2008 | country | 4_Eur   | Portugal          | 212   | 206   | 418   | 0.0020835 | 0.0020245 | 0.004108  | 101752     | 65                            | 28                              | 93                              |
| PRT  | 2009 | country | 4_Eur   | Portugal          | 208   | 188   | 396   | 0.0021045 | 0.0019021 | 0.0040066 | 98836      | 64                            | 29                              | 93                              |
| PRT  | 2010 | country | 4_Eur   | Portugal          | 204   | 171   | 375   | 0.0021296 | 0.0017851 | 0.0039147 | 95793      | 62                            | 30                              | 92                              |
| PRT  | 2011 | country | 4_Eur   | Portugal          | 199   | 159   | 358   | 0.0021301 | 0.0017019 | 0.003832  | 93423      | 61                            | 32                              | 93                              |
| PRT  | 2012 | country | 4_Eur   | Portugal          | 192   | 150   | 342   | 0.002117  | 0.0016539 | 0.003771  | 90693      | 59                            | 35                              | 94                              |
| PRT  | 2013 | country | 4_Eur   | Portugal          | 186   | 143   | 329   | 0.0021094 | 0.0016217 | 0.0037311 | 88177      | 57                            | 38                              | 95                              |
| PRT  | 2014 | country | 4_Eur   | Portugal          | 181   | 138   | 319   | 0.0021031 | 0.0016035 | 0.0037066 | 86063      | 55                            | 43                              | 98                              |
| PRT  | 2015 | country | 4_Eur   | Portugal          | 177   | 134   | 311   | 0.0021049 | 0.0015935 | 0.0036984 | 84091      | 54                            | 42                              | 96                              |
| PRT  | 2016 | country | 4_Eur   | Portugal          | 172   | 133   | 305   | 0.0020823 | 0.0016101 | 0.0036924 | 82601      | 53                            | 37                              | 91                              |
| PRT  | 2017 | country | 4_Eur   | Portugal          | 166   | 135   | 301   | 0.0020455 | 0.0016635 | 0.0037089 | 81156      | 52                            | 41                              | 92                              |
| PRT  | 2018 | country | 4_Eur   | Portugal          | 161   | 137   | 298   | 0.0020153 | 0.0017149 | 0.0037302 | 79888      | 50                            | 41                              | 92                              |
| PRT  | 2019 | country | 4_Eur   | Portugal          | 156   | 139   | 295   | 0.0019741 | 0.001759  | 0.0037331 | 79023      | 48                            | 42                              | 90                              |

| iso3 | year | level   | whoreg6 | whoname  | nnd  | pnd  | u5d  | nmr       | pnmr      | u5mr      | Livebirths | Neonatal birth defects deaths | 1-59 month birth defects deaths | Under five birth defects deaths |
|------|------|---------|---------|----------|------|------|------|-----------|-----------|-----------|------------|-------------------------------|---------------------------------|---------------------------------|
| PRY  | 2000 | country | 2_Amr   | Paraguay | 2602 | 2238 | 4840 | 0.0181496 | 0.0156106 | 0.0337602 | 143364     | 297                           | 349                             | 645                             |
| PRY  | 2001 | country | 2_Amr   | Paraguay | 2538 | 2155 | 4693 | 0.0178562 | 0.0151616 | 0.0330177 | 142136     | 297                           | 319                             | 616                             |
| PRY  | 2002 | country | 2_Amr   | Paraguay | 2475 | 2078 | 4553 | 0.0175501 | 0.014735  | 0.0322851 | 141025     | 295                           | 289                             | 584                             |
| PRY  | 2003 | country | 2_Amr   | Paraguay | 2419 | 1998 | 4417 | 0.0172401 | 0.0142397 | 0.0314798 | 140312     | 298                           | 305                             | 602                             |
| PRY  | 2004 | country | 2_Amr   | Paraguay | 2369 | 1928 | 4297 | 0.016935  | 0.0137824 | 0.0307174 | 139888     | 300                           | 297                             | 597                             |
| PRY  | 2005 | country | 2_Amr   | Paraguay | 2321 | 1868 | 4189 | 0.016591  | 0.0133529 | 0.0299439 | 139895     | 303                           | 289                             | 592                             |
| PRY  | 2006 | country | 2_Amr   | Paraguay | 2282 | 1797 | 4079 | 0.0162887 | 0.0128268 | 0.0291155 | 140097     | 304                           | 281                             | 585                             |
| PRY  | 2007 | country | 2_Amr   | Paraguay | 2229 | 1744 | 3973 | 0.0158864 | 0.0124298 | 0.0283162 | 140308     | 302                           | 277                             | 579                             |
| PRY  | 2008 | country | 2_Amr   | Paraguay | 2169 | 1696 | 3865 | 0.0154322 | 0.0120668 | 0.027499  | 140551     | 306                           | 274                             | 579                             |
| PRY  | 2009 | country | 2_Amr   | Paraguay | 2108 | 1651 | 3759 | 0.0149905 | 0.0117406 | 0.0267311 | 140623     | 301                           | 272                             | 572                             |
| PRY  | 2010 | country | 2_Amr   | Paraguay | 2048 | 1597 | 3645 | 0.0145591 | 0.011353  | 0.0259121 | 140668     | 301                           | 272                             | 573                             |
| PRY  | 2011 | country | 2_Amr   | Paraguay | 1986 | 1548 | 3534 | 0.0141152 | 0.0110022 | 0.0251174 | 140700     | 297                           | 271                             | 568                             |
| PRY  | 2012 | country | 2_Amr   | Paraguay | 1920 | 1506 | 3426 | 0.0136389 | 0.010698  | 0.0243369 | 140774     | 297                           | 273                             | 570                             |
| PRY  | 2013 | country | 2_Amr   | Paraguay | 1863 | 1458 | 3321 | 0.0132071 | 0.010336  | 0.0235432 | 141060     | 296                           | 273                             | 569                             |
| PRY  | 2014 | country | 2_Amr   | Paraguay | 1808 | 1422 | 3230 | 0.012784  | 0.0100547 | 0.0228387 | 141427     | 293                           | 274                             | 567                             |
| PRY  | 2015 | country | 2_Amr   | Paraguay | 1760 | 1375 | 3135 | 0.0124088 | 0.0096943 | 0.0221031 | 141835     | 290                           | 272                             | 562                             |
| PRY  | 2016 | country | 2_Amr   | Paraguay | 1705 | 1337 | 3042 | 0.0119768 | 0.0093918 | 0.0213685 | 142359     | 292                           | 272                             | 563                             |
| PRY  | 2017 | country | 2_Amr   | Paraguay | 1656 | 1299 | 2955 | 0.0115971 | 0.009097  | 0.0206941 | 142794     | 289                           | 271                             | 560                             |
| PRY  | 2018 | country | 2_Amr   | Paraguay | 1605 | 1262 | 2867 | 0.0112177 | 0.0088204 | 0.0200382 | 143077     | 285                           | 270                             | 555                             |
| PRY  | 2019 | country | 2_Amr   | Paraguay | 1555 | 1219 | 2774 | 0.0108552 | 0.0085097 | 0.0193649 | 143249     | 279                           | 267                             | 546                             |
| QAT  | 2000 | country | 5_Emr   | Qatar    | 78   | 65   | 143  | 0.0066133 | 0.0055111 | 0.0121243 | 11794      | 19                            | 25                              | 43                              |
| QAT  | 2001 | country | 5_Emr   | Qatar    | 78   | 65   | 143  | 0.0063418 | 0.0052849 | 0.0116267 | 12299      | 19                            | 25                              | 44                              |
| QAT  | 2002 | country | 5_Emr   | Qatar    | 78   | 65   | 143  | 0.0061044 | 0.005087  | 0.0111913 | 12778      | 19                            | 25                              | 44                              |
| QAT  | 2003 | country | 5_Emr   | Qatar    | 79   | 65   | 144  | 0.0058898 | 0.004846  | 0.0107359 | 13413      | 20                            | 25                              | 45                              |
| QAT  | 2004 | country | 5_Emr   | Qatar    | 80   | 65   | 145  | 0.0056789 | 0.0046141 | 0.0102929 | 14087      | 20                            | 25                              | 45                              |
| QAT  | 2005 | country | 5_Emr   | Qatar    | 81   | 67   | 148  | 0.0054675 | 0.0045225 | 0.00999   | 14815      | 21                            | 26                              | 47                              |
| QAT  | 2006 | country | 5_Emr   | Qatar    | 83   | 68   | 151  | 0.0052678 | 0.0043158 | 0.0095836 | 15756      | 21                            | 27                              | 48                              |
| QAT  | 2007 | country | 5_Emr   | Qatar    | 85   | 71   | 156  | 0.0050853 | 0.0042477 | 0.009333  | 16715      | 22                            | 27                              | 49                              |
| QAT  | 2008 | country | 5_Emr   | Qatar    | 88   | 74   | 162  | 0.0049118 | 0.0041303 | 0.0090421 | 17916      | 23                            | 29                              | 52                              |
| QAT  | 2009 | country | 5_Emr   | Qatar    | 91   | 78   | 169  | 0.0047516 | 0.0040728 | 0.0088243 | 19152      | 24                            | 31                              | 55                              |
| QAT  | 2010 | country | 5_Emr   | Qatar    | 94   | 82   | 176  | 0.004607  | 0.0040189 | 0.008626  | 20404      | 24                            | 32                              | 57                              |
| QAT  | 2011 | country | 5_Emr   | Qatar    | 96   | 87   | 183  | 0.0044678 | 0.0040489 | 0.0085167 | 21487      | 26                            | 34                              | 60                              |
| QAT  | 2012 | country | 5_Emr   | Qatar    | 99   | 89   | 188  | 0.0043416 | 0.0039031 | 0.0082447 | 22803      | 26                            | 35                              | 61                              |
| QAT  | 2013 | country | 5_Emr   | Qatar    | 100  | 92   | 192  | 0.004218  | 0.0038806 | 0.0080986 | 23708      | 27                            | 37                              | 64                              |
| QAT  | 2014 | country | 5_Emr   | Qatar    | 101  | 93   | 194  | 0.0040971 | 0.0037726 | 0.0078696 | 24652      | 27                            | 38                              | 65                              |
| QAT  | 2015 | country | 5_Emr   | Qatar    | 100  | 93   | 193  | 0.0039687 | 0.0036909 | 0.0076596 | 25197      | 27                            | 38                              | 65                              |
| QAT  | 2016 | country | 5_Emr   | Qatar    | 99   | 91   | 190  | 0.003838  | 0.0035278 | 0.0073658 | 25795      | 27                            | 37                              | 64                              |
| QAT  | 2017 | country | 5_Emr   | Qatar    | 97   | 87   | 184  | 0.0036899 | 0.0033095 | 0.0069994 | 26288      | 26                            | 36                              | 62                              |
| QAT  | 2018 | country | 5_Emr   | Qatar    | 94   | 84   | 178  | 0.0035393 | 0.0031628 | 0.0067021 | 26559      | 25                            | 35                              | 60                              |
| QAT  | 2019 | country | 5_Emr   | Qatar    | 90   | 82   | 172  | 0.0033941 | 0.0030924 | 0.0064865 | 26517      | 24                            | 34                              | 58                              |

| iso3 | year | level   | whoreg6 | whoname            | nnd   | pnd   | u5d   | nmr       | pnmr      | u5mr      | Livebirths | Neonatal birth defects deaths | 1-59 month birth defects deaths | Under five birth defects deaths |
|------|------|---------|---------|--------------------|-------|-------|-------|-----------|-----------|-----------|------------|-------------------------------|---------------------------------|---------------------------------|
| ROU  | 2000 | country | 4_Eur   | Romania            | 2268  | 2407  | 4675  | 0.0104691 | 0.0111107 | 0.0215799 | 216637     | 528                           | 387                             | 914                             |
| ROU  | 2001 | country | 4_Eur   | Romania            | 2143  | 2301  | 4444  | 0.0099626 | 0.0106971 | 0.0206598 | 215104     | 573                           | 375                             | 949                             |
| ROU  | 2002 | country | 4_Eur   | Romania            | 2086  | 2265  | 4351  | 0.0097002 | 0.0105326 | 0.0202328 | 215047     | 651                           | 394                             | 1046                            |
| ROU  | 2003 | country | 4_Eur   | Romania            | 2048  | 2239  | 4287  | 0.0094724 | 0.0103558 | 0.0198282 | 216208     | 557                           | 463                             | 1020                            |
| ROU  | 2004 | country | 4_Eur   | Romania            | 1989  | 2184  | 4173  | 0.0091046 | 0.0099972 | 0.0191018 | 218461     | 475                           | 351                             | 826                             |
| ROU  | 2005 | country | 4_Eur   | Romania            | 1883  | 2097  | 3980  | 0.0085242 | 0.009493  | 0.0180173 | 220899     | 489                           | 434                             | 923                             |
| ROU  | 2006 | country | 4_Eur   | Romania            | 1727  | 1965  | 3692  | 0.0077503 | 0.0088184 | 0.0165687 | 222830     | 445                           | 349                             | 794                             |
| ROU  | 2007 | country | 4_Eur   | Romania            | 1549  | 1817  | 3366  | 0.0069352 | 0.0081351 | 0.0150703 | 223353     | 402                           | 352                             | 754                             |
| ROU  | 2008 | country | 4_Eur   | Romania            | 1389  | 1695  | 3084  | 0.0062417 | 0.0076167 | 0.0138584 | 222536     | 374                           | 273                             | 647                             |
| ROU  | 2009 | country | 4_Eur   | Romania            | 1266  | 1605  | 2871  | 0.0057592 | 0.0073013 | 0.0130605 | 219823     | 364                           | 295                             | 659                             |
| ROU  | 2010 | country | 4_Eur   | Romania            | 1176  | 1518  | 2694  | 0.0054487 | 0.0070333 | 0.012482  | 215831     | 358                           | 261                             | 619                             |
| ROU  | 2011 | country | 4_Eur   | Romania            | 1115  | 1414  | 2529  | 0.0052864 | 0.0067039 | 0.0119903 | 210921     | 322                           | 254                             | 575                             |
| ROU  | 2012 | country | 4_Eur   | Romania            | 1062  | 1297  | 2359  | 0.0051573 | 0.0062986 | 0.0114559 | 205920     | 272                           | 288                             | 560                             |
| ROU  | 2013 | country | 4_Eur   | Romania            | 1000  | 1174  | 2174  | 0.0049617 | 0.005825  | 0.0107867 | 201544     | 261                           | 242                             | 503                             |
| ROU  | 2014 | country | 4_Eur   | Romania            | 920   | 1060  | 1980  | 0.0046451 | 0.005352  | 0.0099971 | 198057     | 226                           | 210                             | 437                             |
| ROU  | 2015 | country | 4_Eur   | Romania            | 839   | 968   | 1807  | 0.0042946 | 0.0049549 | 0.0092495 | 195361     | 220                           | 205                             | 425                             |
| ROU  | 2016 | country | 4_Eur   | Romania            | 770   | 901   | 1671  | 0.0039811 | 0.0046584 | 0.0086394 | 193415     | 187                           | 193                             | 380                             |
| ROU  | 2017 | country | 4_Eur   | Romania            | 715   | 842   | 1557  | 0.0037353 | 0.0043987 | 0.008134  | 191419     | 181                           | 176                             | 358                             |
| ROU  | 2018 | country | 4_Eur   | Romania            | 674   | 766   | 1440  | 0.0035615 | 0.0040477 | 0.0076092 | 189246     | 170                           | 162                             | 333                             |
| ROU  | 2019 | country | 4_Eur   | Romania            | 644   | 673   | 1317  | 0.0034476 | 0.0036028 | 0.0070504 | 186799     | 161                           | 143                             | 303                             |
| RUS  | 2000 | country | 4_Eur   | Russian Federation | 11934 | 13457 | 25391 | 0.008895  | 0.010143  | 0.019138  | 1326730    | 2668                          | 3112                            | 5780                            |
| RUS  | 2001 | country | 4_Eur   | Russian Federation | 11624 | 12814 | 24438 | 0.0085853 | 0.0094642 | 0.0180495 | 1353945    | 2594                          | 2997                            | 5591                            |
| RUS  | 2002 | country | 4_Eur   | Russian Federation | 11066 | 12376 | 23442 | 0.007965  | 0.0089079 | 0.0168729 | 1389330    | 2521                          | 2930                            | 5452                            |
| RUS  | 2003 | country | 4_Eur   | Russian Federation | 10527 | 11895 | 22422 | 0.0073606 | 0.0083171 | 0.0156777 | 1430185    | 2412                          | 2875                            | 5287                            |
| RUS  | 2004 | country | 4_Eur   | Russian Federation | 10097 | 11305 | 21402 | 0.00685   | 0.0076695 | 0.0145195 | 1474017    | 2353                          | 2800                            | 5154                            |
| RUS  | 2005 | country | 4_Eur   | Russian Federation | 9698  | 10715 | 20413 | 0.0063806 | 0.0070497 | 0.0134303 | 1519925    | 2275                          | 2724                            | 4998                            |
| RUS  | 2006 | country | 4_Eur   | Russian Federation | 9250  | 10253 | 19503 | 0.0058993 | 0.006539  | 0.0124384 | 1567972    | 2168                          | 2672                            | 4840                            |
| RUS  | 2007 | country | 4_Eur   | Russian Federation | 8766  | 9985  | 18751 | 0.0054157 | 0.0061688 | 0.0115846 | 1618617    | 2095                          | 2654                            | 4749                            |
| RUS  | 2008 | country | 4_Eur   | Russian Federation | 8291  | 9948  | 18239 | 0.0049611 | 0.0059526 | 0.0109136 | 1671213    | 1988                          | 2690                            | 4677                            |
| RUS  | 2009 | country | 4_Eur   | Russian Federation | 7909  | 10068 | 17977 | 0.0045895 | 0.0058423 | 0.0104318 | 1723282    | 1955                          | 2813                            | 4768                            |
| RUS  | 2010 | country | 4_Eur   | Russian Federation | 7857  | 10054 | 17911 | 0.0044327 | 0.0056721 | 0.0101048 | 1772528    | 1935                          | 2871                            | 4807                            |
| RUS  | 2011 | country | 4_Eur   | Russian Federation | 8293  | 9654  | 17947 | 0.0045668 | 0.0053163 | 0.0098831 | 1815929    | 2042                          | 2719                            | 4762                            |
| RUS  | 2012 | country | 4_Eur   | Russian Federation | 8880  | 9015  | 17895 | 0.0047952 | 0.0048681 | 0.0096634 | 1851836    | 2197                          | 2471                            | 4668                            |
| RUS  | 2013 | country | 4_Eur   | Russian Federation | 8948  | 8554  | 17502 | 0.0047637 | 0.0045539 | 0.0093176 | 1878391    | 2207                          | 2355                            | 4562                            |
| RUS  | 2014 | country | 4_Eur   | Russian Federation | 8270  | 8400  | 16670 | 0.0043654 | 0.0044341 | 0.0087995 | 1894423    | 2056                          | 2431                            | 4487                            |
| RUS  | 2015 | country | 4_Eur   | Russian Federation | 7346  | 8191  | 15537 | 0.0038695 | 0.0043146 | 0.0081841 | 1898446    | 1867                          | 2463                            | 4330                            |
| RUS  | 2016 | country | 4_Eur   | Russian Federation | 6608  | 7641  | 14249 | 0.0034967 | 0.0040433 | 0.00754   | 1889783    | 1677                          | 2352                            | 4028                            |
| RUS  | 2017 | country | 4_Eur   | Russian Federation | 6046  | 6885  | 12931 | 0.0032324 | 0.003681  | 0.0069134 | 1870418    | 1552                          | 2127                            | 3679                            |
| RUS  | 2018 | country | 4_Eur   | Russian Federation | 5432  | 6251  | 11683 | 0.0029487 | 0.0033932 | 0.0063419 | 1842197    | 1452                          | 1973                            | 3425                            |
| RUS  | 2019 | country | 4_Eur   | Russian Federation | 4751  | 5805  | 10556 | 0.0026287 | 0.0032119 | 0.0058406 | 1807352    | 1265                          | 1866                            | 3132                            |

| iso3 | year | level   | whoreg6 | whoname      | nnd   | pnd   | u5d   | nmr       | pnmr      | u5mr      | Livebirths | Neonatal birth defects deaths | 1-59 month birth defects deaths | Under five birth defects deaths |
|------|------|---------|---------|--------------|-------|-------|-------|-----------|-----------|-----------|------------|-------------------------------|---------------------------------|---------------------------------|
| RWA  | 2000 | country | 1_Afr   | Rwanda       | 12241 | 39205 | 51446 | 0.0408613 | 0.1308676 | 0.1717289 | 299575     | 534                           | 285                             | 819                             |
| RWA  | 2001 | country | 1_Afr   | Rwanda       | 12027 | 36666 | 48693 | 0.0392748 | 0.1197344 | 0.1590092 | 306227     | 568                           | 195                             | 762                             |
| RWA  | 2002 | country | 1_Afr   | Rwanda       | 11721 | 33924 | 45645 | 0.037438  | 0.1083566 | 0.1457945 | 313078     | 556                           | 396                             | 952                             |
| RWA  | 2003 | country | 1_Afr   | Rwanda       | 11294 | 30696 | 41990 | 0.0353308 | 0.0960272 | 0.131358  | 319664     | 581                           | 559                             | 1139                            |
| RWA  | 2004 | country | 1_Afr   | Rwanda       | 10832 | 27153 | 37985 | 0.0332552 | 0.0833621 | 0.1166173 | 325723     | 583                           | 603                             | 1186                            |
| RWA  | 2005 | country | 1_Afr   | Rwanda       | 10330 | 24282 | 34612 | 0.0312173 | 0.0733805 | 0.1045977 | 330907     | 585                           | 792                             | 1376                            |
| RWA  | 2006 | country | 1_Afr   | Rwanda       | 9827  | 21722 | 31549 | 0.0293263 | 0.0648235 | 0.0941497 | 335092     | 594                           | 1003                            | 1598                            |
| RWA  | 2007 | country | 1_Afr   | Rwanda       | 9348  | 19318 | 28666 | 0.027616  | 0.0570701 | 0.0846861 | 338500     | 588                           | 1038                            | 1626                            |
| RWA  | 2008 | country | 1_Afr   | Rwanda       | 8894  | 17224 | 26118 | 0.026047  | 0.0504435 | 0.0764905 | 341459     | 589                           | 1022                            | 1611                            |
| RWA  | 2009 | country | 1_Afr   | Rwanda       | 8453  | 15380 | 23833 | 0.0245678 | 0.0446992 | 0.069267  | 344068     | 586                           | 1098                            | 1684                            |
| RWA  | 2010 | country | 1_Afr   | Rwanda       | 8023  | 13639 | 21662 | 0.0231332 | 0.0393251 | 0.0624583 | 346818     | 571                           | 1163                            | 1734                            |
| RWA  | 2011 | country | 1_Afr   | Rwanda       | 7621  | 12039 | 19660 | 0.0217611 | 0.0343759 | 0.056137  | 350212     | 564                           | 1169                            | 1733                            |
| RWA  | 2012 | country | 1_Afr   | Rwanda       | 7275  | 10852 | 18127 | 0.0205248 | 0.0306153 | 0.0511402 | 354449     | 556                           | 1234                            | 1790                            |
| RWA  | 2013 | country | 1_Afr   | Rwanda       | 6995  | 9876  | 16871 | 0.0194482 | 0.0274574 | 0.0469057 | 359673     | 572                           | 1174                            | 1746                            |
| RWA  | 2014 | country | 1_Afr   | Rwanda       | 6809  | 9003  | 15812 | 0.0186181 | 0.0246171 | 0.0432352 | 365720     | 589                           | 1187                            | 1776                            |
| RWA  | 2015 | country | 1_Afr   | Rwanda       | 6649  | 8427  | 15076 | 0.0178565 | 0.0226325 | 0.040489  | 372358     | 609                           | 1132                            | 1741                            |
| RWA  | 2016 | country | 1_Afr   | Rwanda       | 6537  | 7986  | 14523 | 0.017248  | 0.0210718 | 0.0383199 | 379000     | 643                           | 1069                            | 1713                            |
| RWA  | 2017 | country | 1_Afr   | Rwanda       | 6443  | 7682  | 14125 | 0.0167307 | 0.0199489 | 0.0366796 | 385101     | 672                           | 1080                            | 1752                            |
| RWA  | 2018 | country | 1_Afr   | Rwanda       | 6346  | 7375  | 13721 | 0.016258  | 0.0188947 | 0.0351527 | 390330     | 692                           | 1114                            | 1807                            |
| RWA  | 2019 | country | 1_Afr   | Rwanda       | 6261  | 7085  | 13346 | 0.0158751 | 0.0179635 | 0.0338386 | 394391     | 698                           | 1081                            | 1780                            |
| SAU  | 2000 | country | 5_Emr   | Saudi Arabia | 6700  | 5373  | 12073 | 0.0121595 | 0.0097512 | 0.0219106 | 551011     | 1394                          | 1611                            | 3005                            |
| SAU  | 2001 | country | 5_Emr   | Saudi Arabia | 6359  | 5041  | 11400 | 0.0114831 | 0.009103  | 0.0205861 | 553773     | 1427                          | 1561                            | 2988                            |
| SAU  | 2002 | country | 5_Emr   | Saudi Arabia | 6050  | 4756  | 10806 | 0.0108352 | 0.0085177 | 0.019353  | 558364     | 1418                          | 1522                            | 2941                            |
| SAU  | 2003 | country | 5_Emr   | Saudi Arabia | 5778  | 4506  | 10284 | 0.010241  | 0.0079865 | 0.0182276 | 564201     | 1405                          | 1477                            | 2882                            |
| SAU  | 2004 | country | 5_Emr   | Saudi Arabia | 5521  | 4288  | 9809  | 0.0096699 | 0.0075104 | 0.0171803 | 570945     | 1378                          | 1437                            | 2815                            |
| SAU  | 2005 | country | 5_Emr   | Saudi Arabia | 5280  | 4077  | 9357  | 0.0091329 | 0.0070521 | 0.016185  | 578128     | 1339                          | 1398                            | 2737                            |
| SAU  | 2006 | country | 5_Emr   | Saudi Arabia | 5038  | 3875  | 8913  | 0.0086032 | 0.0066172 | 0.0152204 | 585594     | 1306                          | 1357                            | 2663                            |
| SAU  | 2007 | country | 5_Emr   | Saudi Arabia | 4791  | 3696  | 8487  | 0.0080818 | 0.0062347 | 0.0143165 | 592811     | 1241                          | 1317                            | 2558                            |
| SAU  | 2008 | country | 5_Emr   | Saudi Arabia | 4556  | 3505  | 8061  | 0.007598  | 0.0058452 | 0.0134432 | 599632     | 1183                          | 1277                            | 2460                            |
| SAU  | 2009 | country | 5_Emr   | Saudi Arabia | 4308  | 3327  | 7635  | 0.007115  | 0.0054948 | 0.0126098 | 605483     | 1143                          | 1234                            | 2378                            |
| SAU  | 2010 | country | 5_Emr   | Saudi Arabia | 4059  | 3147  | 7206  | 0.0066531 | 0.0051582 | 0.0118113 | 610093     | 1100                          | 1189                            | 2289                            |
| SAU  | 2011 | country | 5_Emr   | Saudi Arabia | 3817  | 2971  | 6788  | 0.006225  | 0.0048453 | 0.0110704 | 613168     | 1042                          | 1141                            | 2183                            |
| SAU  | 2012 | country | 5_Emr   | Saudi Arabia | 3573  | 2793  | 6366  | 0.0058102 | 0.0045418 | 0.010352  | 614954     | 975                           | 1090                            | 2064                            |
| SAU  | 2013 | country | 5_Emr   | Saudi Arabia | 3333  | 2629  | 5962  | 0.0054182 | 0.0042737 | 0.0096919 | 615153     | 911                           | 1041                            | 1952                            |
| SAU  | 2014 | country | 5_Emr   | Saudi Arabia | 3091  | 2469  | 5560  | 0.0050325 | 0.0040198 | 0.0090522 | 614213     | 851                           | 991                             | 1842                            |
| SAU  | 2015 | country | 5_Emr   | Saudi Arabia | 2870  | 2293  | 5163  | 0.0046909 | 0.0037478 | 0.0084387 | 611827     | 801                           | 933                             | 1734                            |
| SAU  | 2016 | country | 5_Emr   | Saudi Arabia | 2650  | 2143  | 4793  | 0.0043578 | 0.003524  | 0.0078818 | 608112     | 748                           | 883                             | 1631                            |
| SAU  | 2017 | country | 5_Emr   | Saudi Arabia | 2460  | 2018  | 4478  | 0.0040763 | 0.0033439 | 0.0074201 | 603493     | 709                           | 840                             | 1549                            |
| SAU  | 2018 | country | 5_Emr   | Saudi Arabia | 2303  | 1897  | 4200  | 0.0038499 | 0.0031712 | 0.007021  | 598205     | 655                           | 796                             | 1451                            |
| SAU  | 2019 | country | 5_Emr   | Saudi Arabia | 2170  | 1794  | 3964  | 0.0036656 | 0.0030304 | 0.006696  | 591993     | 619                           | 759                             | 1378                            |

| iso3 | year | level   | whoreg6 | whoname | nnd   | pnd   | u5d    | nmr       | pnmr      | u5mr      | Livebirths | Neonatal birth defects deaths | 1-59 month birth defects deaths | Under five birth defects deaths |
|------|------|---------|---------|---------|-------|-------|--------|-----------|-----------|-----------|------------|-------------------------------|---------------------------------|---------------------------------|
| SDN  | 2000 | country | 5_Emr   | Sudan   | 39942 | 70258 | 110200 | 0.0368932 | 0.0648955 | 0.1017886 | 1082639    | 2469                          | 1209                            | 3678                            |
| SDN  | 2001 | country | 5_Emr   | Sudan   | 39870 | 70297 | 110167 | 0.0362189 | 0.0638596 | 0.1000784 | 1100808    | 2560                          | 1251                            | 3811                            |
| SDN  | 2002 | country | 5_Emr   | Sudan   | 39755 | 69173 | 108928 | 0.0355582 | 0.0618705 | 0.0974287 | 1118026    | 2657                          | 1319                            | 3976                            |
| SDN  | 2003 | country | 5_Emr   | Sudan   | 39592 | 67441 | 107033 | 0.034904  | 0.0594553 | 0.0943592 | 1134313    | 2675                          | 1058                            | 3733                            |
| SDN  | 2004 | country | 5_Emr   | Sudan   | 39382 | 62243 | 101625 | 0.0342538 | 0.0541379 | 0.0883917 | 1149712    | 2794                          | 1744                            | 4539                            |
| SDN  | 2005 | country | 5_Emr   | Sudan   | 39219 | 59277 | 98496  | 0.0336847 | 0.050912  | 0.0845966 | 1164299    | 2888                          | 1868                            | 4756                            |
| SDN  | 2006 | country | 5_Emr   | Sudan   | 39123 | 57340 | 96463  | 0.0332082 | 0.0486715 | 0.0818797 | 1178112    | 2893                          | 2117                            | 5011                            |
| SDN  | 2007 | country | 5_Emr   | Sudan   | 39077 | 55549 | 94626  | 0.0328026 | 0.0466298 | 0.0794324 | 1191278    | 2990                          | 2540                            | 5530                            |
| SDN  | 2008 | country | 5_Emr   | Sudan   | 39053 | 53947 | 93000  | 0.0324357 | 0.0448058 | 0.0772414 | 1204014    | 3089                          | 1773                            | 4862                            |
| SDN  | 2009 | country | 5_Emr   | Sudan   | 39016 | 52436 | 91452  | 0.0320719 | 0.0431032 | 0.0751751 | 1216515    | 3086                          | 1967                            | 5053                            |
| SDN  | 2010 | country | 5_Emr   | Sudan   | 38951 | 51346 | 90297  | 0.0316914 | 0.0417763 | 0.0734677 | 1229070    | 3217                          | 2424                            | 5641                            |
| SDN  | 2011 | country | 5_Emr   | Sudan   | 38926 | 50537 | 89463  | 0.0313464 | 0.0406963 | 0.0720427 | 1241802    | 3219                          | 2310                            | 5529                            |
| SDN  | 2012 | country | 5_Emr   | Sudan   | 38824 | 50121 | 88945  | 0.0309389 | 0.0399413 | 0.0708803 | 1254860    | 3280                          | 3372                            | 6651                            |
| SDN  | 2013 | country | 5_Emr   | Sudan   | 38687 | 49375 | 88062  | 0.0305005 | 0.0389267 | 0.0694271 | 1268407    | 3393                          | 3502                            | 6895                            |
| SDN  | 2014 | country | 5_Emr   | Sudan   | 38418 | 45581 | 83999  | 0.0299545 | 0.0355398 | 0.0654944 | 1282544    | 3411                          | 2613                            | 6024                            |
| SDN  | 2015 | country | 5_Emr   | Sudan   | 38147 | 45352 | 83499  | 0.0294031 | 0.0349569 | 0.06436   | 1297380    | 3414                          | 2664                            | 6078                            |
| SDN  | 2016 | country | 5_Emr   | Sudan   | 37882 | 45385 | 83267  | 0.0288511 | 0.0345656 | 0.0634167 | 1313018    | 3430                          | 2603                            | 6033                            |
| SDN  | 2017 | country | 5_Emr   | Sudan   | 37634 | 43516 | 81150  | 0.0283096 | 0.0327345 | 0.0610441 | 1329373    | 3555                          | 2830                            | 6385                            |
| SDN  | 2018 | country | 5_Emr   | Sudan   | 37371 | 44552 | 81923  | 0.0277575 | 0.0330915 | 0.060849  | 1346340    | 3525                          | 2687                            | 6212                            |
| SDN  | 2019 | country | 5_Emr   | Sudan   | 37126 | 46439 | 83565  | 0.02722   | 0.0340478 | 0.0612678 | 1363925    | 3568                          | 2658                            | 6226                            |
| SEN  | 2000 | country | 1_Afr   | Senegal | 14583 | 35068 | 49651  | 0.0378782 | 0.0910857 | 0.1289639 | 384997     | 684                           | 277                             | 961                             |
| SEN  | 2001 | country | 1_Afr   | Senegal | 14475 | 38477 | 52952  | 0.0369032 | 0.0980943 | 0.1349975 | 392243     | 693                           | 193                             | 886                             |
| SEN  | 2002 | country | 1_Afr   | Senegal | 14325 | 43793 | 58118  | 0.035794  | 0.109426  | 0.14522   | 400207     | 709                           | 258                             | 967                             |
| SEN  | 2003 | country | 1_Afr   | Senegal | 14135 | 29694 | 43829  | 0.0345606 | 0.0726041 | 0.1071647 | 408991     | 722                           | 340                             | 1062                            |
| SEN  | 2004 | country | 1_Afr   | Senegal | 13928 | 24854 | 38782  | 0.0332736 | 0.0593757 | 0.0926493 | 418590     | 721                           | 367                             | 1088                            |
| SEN  | 2005 | country | 1_Afr   | Senegal | 13723 | 23396 | 37119  | 0.0319889 | 0.0545362 | 0.0865251 | 428993     | 728                           | 630                             | 1358                            |
| SEN  | 2006 | country | 1_Afr   | Senegal | 13541 | 21978 | 35519  | 0.0307621 | 0.0499282 | 0.0806903 | 440185     | 745                           | 793                             | 1537                            |
| SEN  | 2007 | country | 1_Afr   | Senegal | 13403 | 20522 | 33925  | 0.0296629 | 0.0454174 | 0.0750803 | 451844     | 753                           | 923                             | 1676                            |
| SEN  | 2008 | country | 1_Afr   | Senegal | 13261 | 19641 | 32902  | 0.0285971 | 0.0423562 | 0.0709533 | 463718     | 757                           | 806                             | 1563                            |
| SEN  | 2009 | country | 1_Afr   | Senegal | 13149 | 19234 | 32383  | 0.0276538 | 0.0404513 | 0.0681051 | 475486     | 768                           | 855                             | 1623                            |
| SEN  | 2010 | country | 1_Afr   | Senegal | 13045 | 18381 | 31426  | 0.0267956 | 0.0377554 | 0.064551  | 486834     | 773                           | 910                             | 1682                            |
| SEN  | 2011 | country | 1_Afr   | Senegal | 12967 | 17402 | 30369  | 0.0260722 | 0.0349902 | 0.0610624 | 497350     | 767                           | 992                             | 1760                            |
| SEN  | 2012 | country | 1_Afr   | Senegal | 12903 | 16739 | 29642  | 0.0254535 | 0.0330212 | 0.0584747 | 506925     | 789                           | 1449                            | 2238                            |
| SEN  | 2013 | country | 1_Afr   | Senegal | 12825 | 16128 | 28953  | 0.0248764 | 0.0312831 | 0.0561594 | 515550     | 786                           | 1021                            | 1807                            |
| SEN  | 2014 | country | 1_Afr   | Senegal | 12768 | 15152 | 27920  | 0.0244066 | 0.0289641 | 0.0533707 | 523138     | 799                           | 1011                            | 1811                            |
| SEN  | 2015 | country | 1_Afr   | Senegal | 12696 | 14613 | 27309  | 0.0239599 | 0.0275781 | 0.051538  | 529885     | 808                           | 1032                            | 1840                            |
| SEN  | 2016 | country | 1_Afr   | Senegal | 12591 | 14045 | 26636  | 0.0234907 | 0.0262026 | 0.0496933 | 536000     | 803                           | 1347                            | 2150                            |
| SEN  | 2017 | country | 1_Afr   | Senegal | 12460 | 13512 | 25972  | 0.0229989 | 0.0249416 | 0.0479406 | 541764     | 811                           | 1226                            | 2038                            |
| SEN  | 2018 | country | 1_Afr   | Senegal | 12322 | 12950 | 25272  | 0.0225054 | 0.0236528 | 0.0461582 | 547512     | 802                           | 962                             | 1764                            |
| SEN  | 2019 | country | 1_Afr   | Senegal | 12156 | 12591 | 24747  | 0.0219631 | 0.0227498 | 0.044713  | 553473     | 805                           | 942                             | 1746                            |

| iso3 | year | level   | whoreg6 | whoname         | nnd | pnd | u5d | nmr       | pnmr      | u5mr      | Livebirths | Neonatal birth defects deaths | 1-59 month birth defects deaths | Under five birth defects deaths |
|------|------|---------|---------|-----------------|-----|-----|-----|-----------|-----------|-----------|------------|-------------------------------|---------------------------------|---------------------------------|
| SGP  | 2000 | country | 6_Wpr   | Singapore       | 81  | 119 | 200 | 0.0016088 | 0.0023636 | 0.0039724 | 50347      | 36                            | 31                              | 67                              |
| SGP  | 2001 | country | 6_Wpr   | Singapore       | 73  | 109 | 182 | 0.0014845 | 0.0022166 | 0.0037011 | 49174      | 41                            | 28                              | 70                              |
| SGP  | 2002 | country | 6_Wpr   | Singapore       | 67  | 99  | 166 | 0.0013953 | 0.0020617 | 0.003457  | 48019      | 20                            | 22                              | 42                              |
| SGP  | 2003 | country | 6_Wpr   | Singapore       | 63  | 91  | 154 | 0.0013297 | 0.0019207 | 0.0032505 | 47378      | 20                            | 20                              | 40                              |
| SGP  | 2004 | country | 6_Wpr   | Singapore       | 60  | 84  | 144 | 0.0012838 | 0.0017973 | 0.0030811 | 46736      | 35                            | 15                              | 50                              |
| SGP  | 2005 | country | 6_Wpr   | Singapore       | 58  | 80  | 138 | 0.0012515 | 0.0017263 | 0.0029778 | 46343      | 31                            | 16                              | 47                              |
| SGP  | 2006 | country | 6_Wpr   | Singapore       | 57  | 78  | 135 | 0.0012298 | 0.0016828 | 0.0029126 | 46350      | 18                            | 34                              | 52                              |
| SGP  | 2007 | country | 6_Wpr   | Singapore       | 57  | 77  | 134 | 0.0012121 | 0.0016374 | 0.0028496 | 47024      | 19                            | 23                              | 42                              |
| SGP  | 2008 | country | 6_Wpr   | Singapore       | 56  | 79  | 135 | 0.0011691 | 0.0016492 | 0.0028183 | 47901      | 19                            | 24                              | 43                              |
| SGP  | 2009 | country | 6_Wpr   | Singapore       | 56  | 80  | 136 | 0.0011596 | 0.0016566 | 0.0028162 | 48292      | 18                            | 17                              | 34                              |
| SGP  | 2010 | country | 6_Wpr   | Singapore       | 55  | 83  | 138 | 0.0011242 | 0.0016965 | 0.0028208 | 48923      | 24                            | 22                              | 46                              |
| SGP  | 2011 | country | 6_Wpr   | Singapore       | 54  | 84  | 138 | 0.001087  | 0.0016909 | 0.0027778 | 49679      | 15                            | 27                              | 42                              |
| SGP  | 2012 | country | 6_Wpr   | Singapore       | 54  | 85  | 139 | 0.0010717 | 0.0016869 | 0.0027585 | 50389      | 21                            | 25                              | 46                              |
| SGP  | 2013 | country | 6_Wpr   | Singapore       | 53  | 86  | 139 | 0.0010504 | 0.0017044 | 0.0027548 | 50457      | 17                            | 17                              | 34                              |
| SGP  | 2014 | country | 6_Wpr   | Singapore       | 52  | 87  | 139 | 0.0010299 | 0.0017232 | 0.0027531 | 50488      | 12                            | 31                              | 43                              |
| SGP  | 2015 | country | 6_Wpr   | Singapore       | 51  | 87  | 138 | 0.0010067 | 0.0017174 | 0.0027241 | 50659      | 18                            | 36                              | 54                              |
| SGP  | 2016 | country | 6_Wpr   | Singapore       | 50  | 87  | 137 | 0.0009929 | 0.0017277 | 0.0027206 | 50356      | 21                            | 37                              | 59                              |
| SGP  | 2017 | country | 6_Wpr   | Singapore       | 49  | 86  | 135 | 0.0009669 | 0.001697  | 0.0026638 | 50679      | 17                            | 34                              | 51                              |
| SGP  | 2018 | country | 6_Wpr   | Singapore       | 47  | 85  | 132 | 0.0009356 | 0.0016921 | 0.0026277 | 50233      | 17                            | 34                              | 51                              |
| SGP  | 2019 | country | 6_Wpr   | Singapore       | 46  | 82  | 128 | 0.0009109 | 0.0016238 | 0.0025347 | 50500      | 17                            | 33                              | 50                              |
| SLB  | 2000 | country | 6_Wpr   | Solomon Islands | 190 | 248 | 438 | 0.0129231 | 0.016868  | 0.0297911 | 14702      | 27                            | 19                              | 46                              |
| SLB  | 2001 | country | 6_Wpr   | Solomon Islands | 192 | 249 | 441 | 0.0128215 | 0.0166278 | 0.0294493 | 14975      | 27                            | 17                              | 45                              |
| SLB  | 2002 | country | 6_Wpr   | Solomon Islands | 194 | 250 | 444 | 0.0127343 | 0.0164102 | 0.0291446 | 15234      | 29                            | 17                              | 45                              |
| SLB  | 2003 | country | 6_Wpr   | Solomon Islands | 196 | 252 | 448 | 0.0126265 | 0.016234  | 0.0288605 | 15523      | 29                            | 17                              | 46                              |
| SLB  | 2004 | country | 6_Wpr   | Solomon Islands | 198 | 254 | 452 | 0.0124859 | 0.0160173 | 0.0285032 | 15858      | 30                            | 18                              | 48                              |
| SLB  | 2005 | country | 6_Wpr   | Solomon Islands | 199 | 256 | 455 | 0.0123164 | 0.0158442 | 0.0281607 | 16157      | 31                            | 19                              | 49                              |
| SLB  | 2006 | country | 6_Wpr   | Solomon Islands | 199 | 258 | 457 | 0.0121062 | 0.0156955 | 0.0278018 | 16438      | 31                            | 21                              | 51                              |
| SLB  | 2007 | country | 6_Wpr   | Solomon Islands | 199 | 259 | 458 | 0.0118596 | 0.0154353 | 0.0272949 | 16780      | 31                            | 20                              | 52                              |
| SLB  | 2008 | country | 6_Wpr   | Solomon Islands | 198 | 260 | 458 | 0.0115615 | 0.0151818 | 0.0267433 | 17126      | 33                            | 19                              | 52                              |
| SLB  | 2009 | country | 6_Wpr   | Solomon Islands | 198 | 260 | 458 | 0.0112553 | 0.0147796 | 0.0260349 | 17592      | 34                            | 23                              | 57                              |
| SLB  | 2010 | country | 6_Wpr   | Solomon Islands | 197 | 259 | 456 | 0.0109425 | 0.0143863 | 0.0253288 | 18003      | 35                            | 22                              | 57                              |
| SLB  | 2011 | country | 6_Wpr   | Solomon Islands | 196 | 258 | 454 | 0.0106137 | 0.0139711 | 0.0245848 | 18467      | 36                            | 27                              | 64                              |
| SLB  | 2012 | country | 6_Wpr   | Solomon Islands | 195 | 257 | 452 | 0.0103039 | 0.01358   | 0.0238839 | 18925      | 38                            | 29                              | 67                              |
| SLB  | 2013 | country | 6_Wpr   | Solomon Islands | 194 | 256 | 450 | 0.0099817 | 0.0131717 | 0.0231535 | 19436      | 38                            | 30                              | 68                              |
| SLB  | 2014 | country | 6_Wpr   | Solomon Islands | 192 | 255 | 447 | 0.0096664 | 0.0128382 | 0.0225046 | 19863      | 38                            | 32                              | 70                              |
| SLB  | 2015 | country | 6_Wpr   | Solomon Islands | 189 | 254 | 443 | 0.0093532 | 0.0125699 | 0.0219232 | 20207      | 39                            | 32                              | 71                              |
| SLB  | 2016 | country | 6_Wpr   | Solomon Islands | 187 | 251 | 438 | 0.0090554 | 0.0121545 | 0.0212099 | 20651      | 39                            | 30                              | 68                              |
| SLB  | 2017 | country | 6_Wpr   | Solomon Islands | 183 | 248 | 431 | 0.008772  | 0.0118878 | 0.0206598 | 20862      | 38                            | 27                              | 66                              |
| SLB  | 2018 | country | 6_Wpr   | Solomon Islands | 180 | 243 | 423 | 0.0085137 | 0.0114935 | 0.0200072 | 21142      | 38                            | 29                              | 67                              |
| SLB  | 2019 | country | 6_Wpr   | Solomon Islands | 176 | 240 | 416 | 0.0082314 | 0.0112246 | 0.019456  | 21382      | 38                            | 23                              | 60                              |

| iso3 | year | level   | whoreg6 | whoname      | nnd   | pnd   | u5d   | nmr       | pnmr      | u5mr      | Livebirths | Neonatal birth defects deaths | 1-59 month birth defects deaths | Under five birth defects deaths |
|------|------|---------|---------|--------------|-------|-------|-------|-----------|-----------|-----------|------------|-------------------------------|---------------------------------|---------------------------------|
| SLE  | 2000 | country | 1_Afr   | Sierra Leone | 10231 | 41607 | 51838 | 0.0492069 | 0.2001104 | 0.2493173 | 207918     | 348                           | 10                              | 357                             |
| SLE  | 2001 | country | 1_Afr   | Sierra Leone | 10332 | 38483 | 48815 | 0.04859   | 0.1809817 | 0.2295717 | 212637     | 362                           | 14                              | 376                             |
| SLE  | 2002 | country | 1_Afr   | Sierra Leone | 10452 | 37159 | 47611 | 0.0479557 | 0.1704932 | 0.2184489 | 217951     | 379                           | 23                              | 402                             |
| SLE  | 2003 | country | 1_Afr   | Sierra Leone | 10561 | 36417 | 46978 | 0.0472514 | 0.1629327 | 0.2101841 | 223506     | 403                           | 38                              | 441                             |
| SLE  | 2004 | country | 1_Afr   | Sierra Leone | 10639 | 32425 | 43064 | 0.046451  | 0.14157   | 0.1880211 | 229037     | 433                           | 52                              | 485                             |
| SLE  | 2005 | country | 1_Afr   | Sierra Leone | 10665 | 32441 | 43106 | 0.045537  | 0.1385149 | 0.1840519 | 234205     | 444                           | 56                              | 500                             |
| SLE  | 2006 | country | 1_Afr   | Sierra Leone | 10632 | 32455 | 43087 | 0.0445415 | 0.1359648 | 0.1805063 | 238699     | 465                           | 56                              | 521                             |
| SLE  | 2007 | country | 1_Afr   | Sierra Leone | 10510 | 31524 | 42034 | 0.0433688 | 0.1300807 | 0.1734495 | 242340     | 487                           | 55                              | 542                             |
| SLE  | 2008 | country | 1_Afr   | Sierra Leone | 10326 | 31072 | 41398 | 0.0421251 | 0.1267572 | 0.1688823 | 245127     | 498                           | 75                              | 573                             |
| SLE  | 2009 | country | 1_Afr   | Sierra Leone | 10073 | 30422 | 40495 | 0.0407753 | 0.1231467 | 0.163922  | 247037     | 500                           | 84                              | 584                             |
| SLE  | 2010 | country | 1_Afr   | Sierra Leone | 9779  | 28844 | 38623 | 0.0393963 | 0.1162046 | 0.1556009 | 248221     | 501                           | 83                              | 584                             |
| SLE  | 2011 | country | 1_Afr   | Sierra Leone | 9487  | 28330 | 37817 | 0.0381162 | 0.1138214 | 0.1519376 | 248897     | 519                           | 105                             | 624                             |
| SLE  | 2012 | country | 1_Afr   | Sierra Leone | 9216  | 27627 | 36843 | 0.036953  | 0.1107765 | 0.1477294 | 249398     | 519                           | 127                             | 647                             |
| SLE  | 2013 | country | 1_Afr   | Sierra Leone | 8977  | 25381 | 34358 | 0.0359122 | 0.1015376 | 0.1374497 | 249971     | 524                           | 147                             | 670                             |
| SLE  | 2014 | country | 1_Afr   | Sierra Leone | 8782  | 25716 | 34498 | 0.035022  | 0.1025539 | 0.1375759 | 250757     | 528                           | 159                             | 688                             |
| SLE  | 2015 | country | 1_Afr   | Sierra Leone | 8632  | 26479 | 35111 | 0.0342763 | 0.1051428 | 0.1394191 | 251836     | 540                           | 167                             | 707                             |
| SLE  | 2016 | country | 1_Afr   | Sierra Leone | 8427  | 22271 | 30698 | 0.0332931 | 0.0879858 | 0.1212789 | 253116     | 546                           | 221                             | 767                             |
| SLE  | 2017 | country | 1_Afr   | Sierra Leone | 8279  | 21193 | 29472 | 0.0325347 | 0.0832852 | 0.1158199 | 254467     | 544                           | 225                             | 769                             |
| SLE  | 2018 | country | 1_Afr   | Sierra Leone | 8136  | 20296 | 28432 | 0.031808  | 0.0793493 | 0.1111574 | 255785     | 533                           | 269                             | 802                             |
| SLE  | 2019 | country | 1_Afr   | Sierra Leone | 8013  | 19522 | 27535 | 0.0311788 | 0.0759618 | 0.1071406 | 257002     | 550                           | 275                             | 824                             |
| SLV  | 2000 | country | 2_Amr   | El Salvador  | 2166  | 2727  | 4893  | 0.0147735 | 0.0185999 | 0.0333734 | 146614     | 297                           | 485                             | 782                             |
| SLV  | 2001 | country | 2_Amr   | El Salvador  | 2023  | 2477  | 4500  | 0.014213  | 0.0174026 | 0.0316156 | 142335     | 288                           | 425                             | 712                             |
| SLV  | 2002 | country | 2_Amr   | El Salvador  | 1892  | 2244  | 4136  | 0.0136805 | 0.0162257 | 0.0299062 | 138299     | 291                           | 385                             | 676                             |
| SLV  | 2003 | country | 2_Amr   | El Salvador  | 1750  | 2057  | 3807  | 0.0129912 | 0.0152702 | 0.0282613 | 134707     | 284                           | 355                             | 639                             |
| SLV  | 2004 | country | 2_Amr   | El Salvador  | 1622  | 1891  | 3513  | 0.0123299 | 0.0143747 | 0.0267046 | 131550     | 272                           | 340                             | 612                             |
| SLV  | 2005 | country | 2_Amr   | El Salvador  | 1514  | 1739  | 3253  | 0.0117273 | 0.0134702 | 0.0251975 | 129100     | 271                           | 321                             | 593                             |
| SLV  | 2006 | country | 2_Amr   | El Salvador  | 1419  | 1608  | 3027  | 0.0111641 | 0.0126511 | 0.0238152 | 127104     | 270                           | 309                             | 579                             |
| SLV  | 2007 | country | 2_Amr   | El Salvador  | 1339  | 1488  | 2827  | 0.0106797 | 0.0118681 | 0.0225478 | 125378     | 267                           | 296                             | 563                             |
| SLV  | 2008 | country | 2_Amr   | El Salvador  | 1269  | 1381  | 2650  | 0.0102349 | 0.0111382 | 0.0213731 | 123988     | 263                           | 284                             | 547                             |
| SLV  | 2009 | country | 2_Amr   | El Salvador  | 1202  | 1290  | 2492  | 0.0097967 | 0.0105139 | 0.0203106 | 122695     | 255                           | 274                             | 529                             |
| SLV  | 2010 | country | 2_Amr   | El Salvador  | 1142  | 1202  | 2344  | 0.0093871 | 0.0098803 | 0.0192675 | 121656     | 249                           | 263                             | 512                             |
| SLV  | 2011 | country | 2_Amr   | El Salvador  | 1084  | 1129  | 2213  | 0.008978  | 0.0093507 | 0.0183286 | 120740     | 239                           | 254                             | 493                             |
| SLV  | 2012 | country | 2_Amr   | El Salvador  | 1031  | 1064  | 2095  | 0.0085987 | 0.0088739 | 0.0174726 | 119902     | 232                           | 248                             | 480                             |
| SLV  | 2013 | country | 2_Amr   | El Salvador  | 983   | 1010  | 1993  | 0.0082376 | 0.0084639 | 0.0167014 | 119331     | 227                           | 242                             | 468                             |
| SLV  | 2014 | country | 2_Amr   | El Salvador  | 940   | 958   | 1898  | 0.0079006 | 0.0080519 | 0.0159524 | 118979     | 216                           | 234                             | 450                             |
| SLV  | 2015 | country | 2_Amr   | El Salvador  | 901   | 915   | 1816  | 0.0075964 | 0.0077144 | 0.0153109 | 118609     | 207                           | 229                             | 435                             |
| SLV  | 2016 | country | 2_Amr   | El Salvador  | 863   | 881   | 1744  | 0.0073006 | 0.0074529 | 0.0147535 | 118210     | 201                           | 224                             | 426                             |
| SLV  | 2017 | country | 2_Amr   | El Salvador  | 829   | 849   | 1678  | 0.0070354 | 0.0072052 | 0.0142406 | 117832     | 196                           | 219                             | 415                             |
| SLV  | 2018 | country | 2_Amr   | El Salvador  | 796   | 815   | 1611  | 0.0067912 | 0.0069533 | 0.0137446 | 117210     | 191                           | 214                             | 405                             |
| SLV  | 2019 | country | 2_Amr   | El Salvador  | 765   | 787   | 1552  | 0.0065613 | 0.00675   | 0.0133114 | 116592     | 183                           | 209                             | 393                             |

| iso3 | year | level   | whoreg6 | whoname    | nnd   | pnd   | u5d   | nmr       | pnmr      | u5mr      | Livebirths | Neonatal birth defects deaths | 1-59 month birth defects deaths | Under five birth defects deaths |
|------|------|---------|---------|------------|-------|-------|-------|-----------|-----------|-----------|------------|-------------------------------|---------------------------------|---------------------------------|
| SMR  | 2000 | country | 4_Eur   | San Marino | 1     | 1     | 2     | 0.0030423 | 0.0030423 | 0.0060846 | 329        | 1                             | 0                               | 1                               |
| SMR  | 2001 | country | 4_Eur   | San Marino | 1     | 0     | 1     | 0.0027778 | 0         | 0.0027778 | 360        | 1                             | 0                               | 1                               |
| SMR  | 2002 | country | 4_Eur   | San Marino | 1     | 0     | 1     | 0.0025287 | 0         | 0.0025287 | 395        | 1                             | 0                               | 1                               |
| SMR  | 2003 | country | 4_Eur   | San Marino | 1     | 0     | 1     | 0.0023043 | 0         | 0.0023043 | 434        | 1                             | 0                               | 1                               |
| SMR  | 2004 | country | 4_Eur   | San Marino | 1     | 0     | 1     | 0.0021039 | 0         | 0.0021039 | 475        | 1                             | 0                               | 1                               |
| SMR  | 2005 | country | 4_Eur   | San Marino | 1     | 0     | 1     | 0.0019167 | 0         | 0.0019167 | 522        | 1                             | 0                               | 1                               |
| SMR  | 2006 | country | 4_Eur   | San Marino | 0     | 1     | 1     |           |           |           | 0          | 0                             | 0                               | 0                               |
| SMR  | 2007 | country | 4_Eur   | San Marino | 0     | 1     | 1     |           |           |           | 0          | 0                             | 0                               | 0                               |
| SMR  | 2008 | country | 4_Eur   | San Marino | 0     | 1     | 1     |           |           |           | 0          | 0                             | 0                               | 0                               |
| SMR  | 2009 | country | 4_Eur   | San Marino | 0     | 1     | 1     |           |           |           | 0          | 0                             | 0                               | 0                               |
| SMR  | 2010 | country | 4_Eur   | San Marino | 0     | 1     | 1     |           |           |           | 0          | 0                             | 0                               | 0                               |
| SMR  | 2011 | country | 4_Eur   | San Marino | 0     | 1     | 1     |           |           |           | 0          | 0                             | 0                               | 0                               |
| SMR  | 2012 | country | 4_Eur   | San Marino | 0     | 1     | 1     |           |           |           | 0          | 0                             | 0                               | 0                               |
| SMR  | 2013 | country | 4_Eur   | San Marino | 0     | 1     | 1     |           |           |           | 0          | 0                             | 0                               | 0                               |
| SMR  | 2014 | country | 4_Eur   | San Marino | 0     | 1     | 1     |           |           |           | 0          | 0                             | 0                               | 0                               |
| SMR  | 2015 | country | 4_Eur   | San Marino | 0     | 1     | 1     |           |           |           | 0          | 0                             | 0                               | 0                               |
| SMR  | 2016 | country | 4_Eur   | San Marino | 0     | 1     | 1     |           |           |           | 0          | 0                             | 0                               | 0                               |
| SMR  | 2017 | country | 4_Eur   | San Marino | 0     | 0     | 0     |           |           |           | 0          | 0                             | 0                               | 0                               |
| SMR  | 2018 | country | 4_Eur   | San Marino | 0     | 0     | 0     |           |           |           | 0          | 0                             | 0                               | 0                               |
| SMR  | 2019 | country | 4_Eur   | San Marino | 0     | 0     | 0     |           |           |           | 0          | 0                             | 0                               | 0                               |
| SOM  | 2000 | country | 5_Emr   | Somalia    | 19072 | 53185 | 72257 | 0.0439988 | 0.1226962 | 0.166695  | 433466     | 609                           | 69                              | 678                             |
| SOM  | 2001 | country | 5_Emr   | Somalia    | 19686 | 53147 | 72833 | 0.0443974 | 0.1198605 | 0.164258  | 443404     | 628                           | 97                              | 725                             |
| SOM  | 2002 | country | 5_Emr   | Somalia    | 20302 | 66461 | 86763 | 0.0447582 | 0.1465216 | 0.1912798 | 453593     | 659                           | 196                             | 854                             |
| SOM  | 2003 | country | 5_Emr   | Somalia    | 20903 | 64721 | 85624 | 0.0450512 | 0.139489  | 0.1845402 | 463983     | 679                           | 116                             | 795                             |
| SOM  | 2004 | country | 5_Emr   | Somalia    | 21434 | 73251 | 94685 | 0.0451695 | 0.1543671 | 0.1995367 | 474523     | 700                           | 120                             | 820                             |
| SOM  | 2005 | country | 5_Emr   | Somalia    | 21941 | 60665 | 82606 | 0.0452394 | 0.1250826 | 0.1703221 | 484997     | 736                           | 106                             | 842                             |
| SOM  | 2006 | country | 5_Emr   | Somalia    | 22351 | 51682 | 74033 | 0.0451413 | 0.1043793 | 0.1495206 | 495134     | 744                           | 109                             | 853                             |
| SOM  | 2007 | country | 5_Emr   | Somalia    | 22702 | 53067 | 75769 | 0.0449702 | 0.1051192 | 0.1500893 | 504824     | 772                           | 116                             | 889                             |
| SOM  | 2008 | country | 5_Emr   | Somalia    | 22903 | 52515 | 75418 | 0.0445532 | 0.1021564 | 0.1467095 | 514060     | 792                           | 124                             | 916                             |
| SOM  | 2009 | country | 5_Emr   | Somalia    | 22948 | 51686 | 74634 | 0.0438805 | 0.0988316 | 0.1427121 | 522966     | 812                           | 168                             | 980                             |
| SOM  | 2010 | country | 5_Emr   | Somalia    | 22984 | 49647 | 72631 | 0.0432204 | 0.093359  | 0.1365794 | 531786     | 826                           | 191                             | 1017                            |
| SOM  | 2011 | country | 5_Emr   | Somalia    | 22959 | 64049 | 87008 | 0.0424498 | 0.1184229 | 0.1608727 | 540851     | 851                           | 203                             | 1055                            |
| SOM  | 2012 | country | 5_Emr   | Somalia    | 22940 | 56078 | 79018 | 0.0416728 | 0.1018716 | 0.1435444 | 550479     | 858                           | 214                             | 1071                            |
| SOM  | 2013 | country | 5_Emr   | Somalia    | 22952 | 51149 | 74101 | 0.0409133 | 0.0911771 | 0.1320904 | 560991     | 872                           | 221                             | 1093                            |
| SOM  | 2014 | country | 5_Emr   | Somalia    | 23037 | 63788 | 86825 | 0.0402416 | 0.1114259 | 0.1516675 | 572467     | 894                           | 228                             | 1122                            |
| SOM  | 2015 | country | 5_Emr   | Somalia    | 23141 | 57872 | 81013 | 0.0395558 | 0.0989225 | 0.1384783 | 585021     | 906                           | 237                             | 1143                            |
| SOM  | 2016 | country | 5_Emr   | Somalia    | 23353 | 53043 | 76396 | 0.0390106 | 0.0886072 | 0.1276178 | 598632     | 944                           | 246                             | 1190                            |
| SOM  | 2017 | country | 5_Emr   | Somalia    | 23417 | 62661 | 86078 | 0.038197  | 0.1022113 | 0.1404084 | 613058     | 956                           | 257                             | 1213                            |
| SOM  | 2018 | country | 5_Emr   | Somalia    | 23601 | 58328 | 81928 | 0.0375758 | 0.0928647 | 0.1304405 | 628091     | 989                           | 270                             | 1258                            |
| SOM  | 2019 | country | 5_Emr   | Somalia    | 23723 | 48449 | 72172 | 0.0368624 | 0.0752827 | 0.1121451 | 643556     | 983                           | 279                             | 1262                            |

| iso3 | year | level   | whoreg6 | whoname     | nnd   | pnd   | u5d   | nmr       | pnmr      | u5mr      | Livebirths | Neonatal birth defects deaths | 1-59 month birth defects deaths | Under five birth defects deaths |
|------|------|---------|---------|-------------|-------|-------|-------|-----------|-----------|-----------|------------|-------------------------------|---------------------------------|---------------------------------|
| SRB  | 2000 | country | 4_Eur   | Serbia      | 918   | 601   | 1519  | 0.0077997 | 0.0051063 | 0.012906  | 117697     | 162                           | 242                             | 404                             |
| SRB  | 2001 | country | 4_Eur   | Serbia      | 862   | 566   | 1428  | 0.0074862 | 0.0049155 | 0.0124017 | 115145     | 150                           | 223                             | 372                             |
| SRB  | 2002 | country | 4_Eur   | Serbia      | 792   | 518   | 1310  | 0.0070384 | 0.0046034 | 0.0116419 | 112525     | 133                           | 169                             | 302                             |
| SRB  | 2003 | country | 4_Eur   | Serbia      | 716   | 463   | 1179  | 0.0065154 | 0.0042132 | 0.0107286 | 109893     | 131                           | 159                             | 290                             |
| SRB  | 2004 | country | 4_Eur   | Serbia      | 644   | 412   | 1056  | 0.0059942 | 0.0038348 | 0.009829  | 107437     | 132                           | 174                             | 306                             |
| SRB  | 2005 | country | 4_Eur   | Serbia      | 583   | 369   | 952   | 0.0055459 | 0.0035102 | 0.0090561 | 105122     | 92                            | 128                             | 221                             |
| SRB  | 2006 | country | 4_Eur   | Serbia      | 536   | 340   | 876   | 0.0052252 | 0.0033145 | 0.0085398 | 102579     | 94                            | 115                             | 209                             |
| SRB  | 2007 | country | 4_Eur   | Serbia      | 506   | 322   | 828   | 0.0050505 | 0.003214  | 0.0082645 | 100188     | 89                            | 103                             | 192                             |
| SRB  | 2008 | country | 4_Eur   | Serbia      | 484   | 308   | 792   | 0.0049516 | 0.003151  | 0.0081026 | 97746      | 88                            | 122                             | 210                             |
| SRB  | 2009 | country | 4_Eur   | Serbia      | 463   | 294   | 757   | 0.0048651 | 0.0030893 | 0.0079544 | 95167      | 68                            | 93                              | 161                             |
| SRB  | 2010 | country | 4_Eur   | Serbia      | 443   | 277   | 720   | 0.0047695 | 0.0029823 | 0.0077517 | 92882      | 72                            | 90                              | 162                             |
| SRB  | 2011 | country | 4_Eur   | Serbia      | 423   | 259   | 682   | 0.0046573 | 0.0028517 | 0.007509  | 90825      | 74                            | 77                              | 151                             |
| SRB  | 2012 | country | 4_Eur   | Serbia      | 402   | 243   | 645   | 0.0045267 | 0.0027363 | 0.007263  | 88806      | 69                            | 53                              | 122                             |
| SRB  | 2013 | country | 4_Eur   | Serbia      | 382   | 227   | 609   | 0.0043697 | 0.0025967 | 0.0069664 | 87420      | 49                            | 71                              | 121                             |
| SRB  | 2014 | country | 4_Eur   | Serbia      | 360   | 214   | 574   | 0.0041709 | 0.0024794 | 0.0066502 | 86313      | 68                            | 63                              | 132                             |
| SRB  | 2015 | country | 4_Eur   | Serbia      | 337   | 204   | 541   | 0.0039515 | 0.002392  | 0.0063435 | 85284      | 41                            | 67                              | 108                             |
| SRB  | 2016 | country | 4_Eur   | Serbia      | 316   | 196   | 512   | 0.0037352 | 0.0023167 | 0.0060519 | 84601      | 44                            | 69                              | 113                             |
| SRB  | 2017 | country | 4_Eur   | Serbia      | 297   | 190   | 487   | 0.0035385 | 0.0022637 | 0.0058022 | 83934      | 45                            | 62                              | 106                             |
| SRB  | 2018 | country | 4_Eur   | Serbia      | 280   | 183   | 463   | 0.0033629 | 0.0021979 | 0.0055608 | 83261      | 38                            | 59                              | 98                              |
| SRB  | 2019 | country | 4_Eur   | Serbia      | 265   | 176   | 441   | 0.0032192 | 0.0021381 | 0.0053573 | 82317      | 38                            | 57                              | 95                              |
| SSD  | 2000 | country | 1_Afr   | South Sudan | 14829 | 31593 | 46422 | 0.0559637 | 0.1192306 | 0.1751943 | 264976     | 387                           | 41                              | 428                             |
| SSD  | 2001 | country | 1_Afr   | South Sudan | 14821 | 30594 | 45415 | 0.054449  | 0.1123965 | 0.1668454 | 272200     | 394                           | 31                              | 425                             |
| SSD  | 2002 | country | 1_Afr   | South Sudan | 14887 | 29455 | 44342 | 0.0530769 | 0.1050175 | 0.1580944 | 280480     | 403                           | 37                              | 440                             |
| SSD  | 2003 | country | 1_Afr   | South Sudan | 14924 | 28384 | 43308 | 0.0515368 | 0.0980176 | 0.1495543 | 289580     | 420                           | 49                              | 469                             |
| SSD  | 2004 | country | 1_Afr   | South Sudan | 15043 | 26356 | 41399 | 0.0502638 | 0.088063  | 0.1383268 | 299281     | 438                           | 59                              | 497                             |
| SSD  | 2005 | country | 1_Afr   | South Sudan | 15176 | 25012 | 40188 | 0.0490567 | 0.0808509 | 0.1299077 | 309356     | 458                           | 104                             | 562                             |
| SSD  | 2006 | country | 1_Afr   | South Sudan | 15218 | 24121 | 39339 | 0.0476073 | 0.07546   | 0.1230673 | 319657     | 460                           | 125                             | 585                             |
| SSD  | 2007 | country | 1_Afr   | South Sudan | 15232 | 23323 | 38555 | 0.0461656 | 0.0706871 | 0.1168527 | 329943     | 482                           | 156                             | 638                             |
| SSD  | 2008 | country | 1_Afr   | South Sudan | 15220 | 22649 | 37869 | 0.0447696 | 0.0666228 | 0.1113924 | 339963     | 498                           | 114                             | 612                             |
| SSD  | 2009 | country | 1_Afr   | South Sudan | 15158 | 21905 | 37063 | 0.0433777 | 0.0626847 | 0.1060624 | 349442     | 516                           | 132                             | 648                             |
| SSD  | 2010 | country | 1_Afr   | South Sudan | 15028 | 21326 | 36354 | 0.0419804 | 0.0595734 | 0.1015538 | 357977     | 518                           | 167                             | 685                             |
| SSD  | 2011 | country | 1_Afr   | South Sudan | 14884 | 20841 | 35725 | 0.0407436 | 0.0570496 | 0.0977932 | 365309     | 525                           | 172                             | 697                             |
| SSD  | 2012 | country | 1_Afr   | South Sudan | 14761 | 20768 | 35529 | 0.0397473 | 0.0559219 | 0.0956692 | 371371     | 546                           | 173                             | 720                             |
| SSD  | 2013 | country | 1_Afr   | South Sudan | 14722 | 20981 | 35703 | 0.0391335 | 0.0557711 | 0.0949046 | 376200     | 554                           | 255                             | 809                             |
| SSD  | 2014 | country | 1_Afr   | South Sudan | 14799 | 20551 | 35350 | 0.0389618 | 0.0541052 | 0.093067  | 379834     | 562                           | 162                             | 724                             |
| SSD  | 2015 | country | 1_Afr   | South Sudan | 14883 | 21105 | 35988 | 0.0389147 | 0.0551846 | 0.0940993 | 382452     | 565                           | 157                             | 722                             |
| SSD  | 2016 | country | 1_Afr   | South Sudan | 14886 | 21716 | 36602 | 0.0387398 | 0.0565147 | 0.0952545 | 384256     | 596                           | 149                             | 745                             |
| SSD  | 2017 | country | 1_Afr   | South Sudan | 14888 | 21767 | 36655 | 0.038615  | 0.0564577 | 0.0950727 | 385550     | 594                           | 149                             | 743                             |
| SSD  | 2018 | country | 1_Afr   | South Sudan | 14905 | 22523 | 37428 | 0.0385463 | 0.0582467 | 0.096793  | 386678     | 614                           | 233                             | 846                             |
| SSD  | 2019 | country | 1_Afr   | South Sudan | 14976 | 23412 | 38388 | 0.0386046 | 0.06035   | 0.0989546 | 387933     | 617                           | 154                             | 771                             |

| iso3 | year | level   | whoreg6 | whoname           | nnd | pnd | u5d | nmr       | pnmr      | u5mr      | Livebirths | Neonatal birth defects deaths | 1-59 month birth defects deaths | Under five birth defects deaths |
|------|------|---------|---------|-------------------|-----|-----|-----|-----------|-----------|-----------|------------|-------------------------------|---------------------------------|---------------------------------|
| STP  | 2000 | country | 1_Afr   | Sao Tome and Prin | 128 | 310 | 438 | 0.0225774 | 0.0547207 | 0.0772981 | 5669       | 10                            | 5                               | 15                              |
| STP  | 2001 | country | 1_Afr   | Sao Tome and Prin | 128 | 305 | 433 | 0.0221677 | 0.052837  | 0.0750047 | 5774       | 10                            | 5                               | 15                              |
| STP  | 2002 | country | 1_Afr   | Sao Tome and Prin | 127 | 297 | 424 | 0.0216432 | 0.0506266 | 0.0722698 | 5868       | 10                            | 11                              | 20                              |
| STP  | 2003 | country | 1_Afr   | Sao Tome and Prin | 126 | 285 | 411 | 0.0210472 | 0.0476131 | 0.0686604 | 5987       | 10                            | 7                               | 17                              |
| STP  | 2004 | country | 1_Afr   | Sao Tome and Prin | 124 | 271 | 395 | 0.0203697 | 0.0445189 | 0.0648886 | 6087       | 10                            | 13                              | 23                              |
| STP  | 2005 | country | 1_Afr   | Sao Tome and Prin | 122 | 256 | 378 | 0.0197714 | 0.041505  | 0.0612764 | 6171       | 10                            | 12                              | 22                              |
| STP  | 2006 | country | 1_Afr   | Sao Tome and Prin | 120 | 244 | 364 | 0.0192808 | 0.0391258 | 0.0584066 | 6224       | 10                            | 15                              | 26                              |
| STP  | 2007 | country | 1_Afr   | Sao Tome and Prin | 119 | 230 | 349 | 0.0188751 | 0.036411  | 0.0552861 | 6305       | 10                            | 16                              | 27                              |
| STP  | 2008 | country | 1_Afr   | Sao Tome and Prin | 118 | 200 | 318 | 0.0185046 | 0.0313638 | 0.0498684 | 6377       | 11                            | 19                              | 30                              |
| STP  | 2009 | country | 1_Afr   | Sao Tome and Prin | 117 | 183 | 300 | 0.0181902 | 0.0283993 | 0.0465895 | 6432       | 11                            | 16                              | 28                              |
| STP  | 2010 | country | 1_Afr   | Sao Tome and Prin | 115 | 176 | 291 | 0.0178871 | 0.0273541 | 0.0452411 | 6429       | 11                            | 18                              | 29                              |
| STP  | 2011 | country | 1_Afr   | Sao Tome and Prin | 114 | 167 | 281 | 0.0175457 | 0.0257522 | 0.0432979 | 6497       | 12                            | 16                              | 28                              |
| STP  | 2012 | country | 1_Afr   | Sao Tome and Prin | 112 | 160 | 272 | 0.0171223 | 0.0244621 | 0.0415844 | 6541       | 12                            | 16                              | 28                              |
| STP  | 2013 | country | 1_Afr   | Sao Tome and Prin | 109 | 141 | 250 | 0.0166344 | 0.0214484 | 0.0380828 | 6553       | 12                            | 16                              | 29                              |
| STP  | 2014 | country | 1_Afr   | Sao Tome and Prin | 106 | 134 | 240 | 0.0161465 | 0.0204427 | 0.0365892 | 6565       | 12                            | 17                              | 29                              |
| STP  | 2015 | country | 1_Afr   | Sao Tome and Prin | 103 | 130 | 233 | 0.0156905 | 0.0197474 | 0.0354379 | 6564       | 12                            | 17                              | 29                              |
| STP  | 2016 | country | 1_Afr   | Sao Tome and Prin | 101 | 124 | 225 | 0.0152379 | 0.0186508 | 0.0338886 | 6628       | 13                            | 16                              | 29                              |
| STP  | 2017 | country | 1_Afr   | Sao Tome and Prin | 98  | 113 | 211 | 0.0148362 | 0.0171071 | 0.0319433 | 6605       | 13                            | 15                              | 28                              |
| STP  | 2018 | country | 1_Afr   | Sao Tome and Prin | 96  | 107 | 203 | 0.0144295 | 0.0160688 | 0.0304982 | 6653       | 13                            | 16                              | 28                              |
| STP  | 2019 | country | 1_Afr   | Sao Tome and Prin | 94  | 104 | 198 | 0.0140575 | 0.0155191 | 0.0295766 | 6687       | 13                            | 15                              | 28                              |
| SUR  | 2000 | country | 2_Amr   | Suriname          | 193 | 155 | 348 | 0.0172336 | 0.0138404 | 0.031074  | 11199      | 29                            | 13                              | 43                              |
| SUR  | 2001 | country | 2_Amr   | Suriname          | 193 | 142 | 335 | 0.0172389 | 0.0126835 | 0.0299224 | 11196      | 26                            | 17                              | 43                              |
| SUR  | 2002 | country | 2_Amr   | Suriname          | 192 | 131 | 323 | 0.0172491 | 0.0117689 | 0.029018  | 11131      | 32                            | 14                              | 46                              |
| SUR  | 2003 | country | 2_Amr   | Suriname          | 191 | 121 | 312 | 0.0171513 | 0.0108655 | 0.0280168 | 11136      | 25                            | 16                              | 41                              |
| SUR  | 2004 | country | 2_Amr   | Suriname          | 188 | 113 | 301 | 0.0170269 | 0.0102343 | 0.0272612 | 11041      | 29                            | 16                              | 45                              |
| SUR  | 2005 | country | 2_Amr   | Suriname          | 185 | 106 | 291 | 0.0168053 | 0.009629  | 0.0264343 | 11008      | 26                            | 10                              | 36                              |
| SUR  | 2006 | country | 2_Amr   | Suriname          | 181 | 101 | 282 | 0.0165033 | 0.009209  | 0.0257123 | 10968      | 22                            | 17                              | 40                              |
| SUR  | 2007 | country | 2_Amr   | Suriname          | 176 | 97  | 273 | 0.0161043 | 0.0088757 | 0.02498   | 10929      | 27                            | 18                              | 45                              |
| SUR  | 2008 | country | 2_Amr   | Suriname          | 170 | 94  | 264 | 0.01566   | 0.0086591 | 0.024319  | 10856      | 37                            | 13                              | 50                              |
| SUR  | 2009 | country | 2_Amr   | Suriname          | 165 | 92  | 257 | 0.0151938 | 0.0084717 | 0.0236655 | 10860      | 28                            | 13                              | 40                              |
| SUR  | 2010 | country | 2_Amr   | Suriname          | 160 | 90  | 250 | 0.0147582 | 0.0083015 | 0.0230596 | 10841      | 26                            | 16                              | 42                              |
| SUR  | 2011 | country | 2_Amr   | Suriname          | 155 | 88  | 243 | 0.0143366 | 0.0081395 | 0.0224761 | 10812      | 27                            | 27                              | 54                              |
| SUR  | 2012 | country | 2_Amr   | Suriname          | 151 | 85  | 236 | 0.0139175 | 0.0078343 | 0.0217518 | 10850      | 26                            | 9                               | 35                              |
| SUR  | 2013 | country | 2_Amr   | Suriname          | 146 | 84  | 230 | 0.013491  | 0.007762  | 0.021253  | 10822      | 25                            | 16                              | 41                              |
| SUR  | 2014 | country | 2_Amr   | Suriname          | 141 | 83  | 224 | 0.0130824 | 0.007701  | 0.0207833 | 10778      | 22                            | 13                              | 34                              |
| SUR  | 2015 | country | 2_Amr   | Suriname          | 137 | 81  | 218 | 0.0127162 | 0.0075183 | 0.0202345 | 10774      | 23                            | 12                              | 35                              |
| SUR  | 2016 | country | 2_Amr   | Suriname          | 132 | 79  | 211 | 0.0123228 | 0.007375  | 0.0196978 | 10712      | 21                            | 12                              | 34                              |
| SUR  | 2017 | country | 2_Amr   | Suriname          | 128 | 76  | 204 | 0.011967  | 0.0071054 | 0.0190723 | 10696      | 20                            | 12                              | 32                              |
| SUR  | 2018 | country | 2_Amr   | Suriname          | 124 | 74  | 198 | 0.0115788 | 0.0069099 | 0.0184888 | 10709      | 20                            | 11                              | 31                              |
| SUR  | 2019 | country | 2_Amr   | Suriname          | 119 | 72  | 191 | 0.0112152 | 0.0067856 | 0.0180008 | 10611      | 19                            | 11                              | 30                              |

| iso3 | year | level   | whoreg6 | whoname  | nnd | pnd | u5d | nmr       | pnmr      | u5mr      | Livebirths | Neonatal birth defects deaths | 1-59 month birth defects deaths | Under five birth defects deaths |
|------|------|---------|---------|----------|-----|-----|-----|-----------|-----------|-----------|------------|-------------------------------|---------------------------------|---------------------------------|
| SVK  | 2000 | country | 4_Eur   | Slovakia | 273 | 266 | 539 | 0.0050924 | 0.0049618 | 0.0100542 | 53609      | 83                            | 64                              | 147                             |
| SVK  | 2001 | country | 4_Eur   | Slovakia | 255 | 252 | 507 | 0.0048242 | 0.0047675 | 0.0095917 | 52858      | 95                            | 51                              | 146                             |
| SVK  | 2002 | country | 4_Eur   | Slovakia | 239 | 243 | 482 | 0.0045574 | 0.0046337 | 0.0091911 | 52442      | 93                            | 67                              | 159                             |
| SVK  | 2003 | country | 4_Eur   | Slovakia | 225 | 238 | 463 | 0.0042812 | 0.0045286 | 0.0088098 | 52555      | 77                            | 58                              | 135                             |
| SVK  | 2004 | country | 4_Eur   | Slovakia | 213 | 235 | 448 | 0.004019  | 0.0044342 | 0.0084532 | 52998      | 58                            | 60                              | 119                             |
| SVK  | 2005 | country | 4_Eur   | Slovakia | 204 | 233 | 437 | 0.0038012 | 0.0043416 | 0.0081428 | 53667      | 71                            | 64                              | 134                             |
| SVK  | 2006 | country | 4_Eur   | Slovakia | 198 | 229 | 427 | 0.0036339 | 0.0042028 | 0.0078366 | 54488      | 60                            | 75                              | 135                             |
| SVK  | 2007 | country | 4_Eur   | Slovakia | 193 | 226 | 419 | 0.0034912 | 0.0040881 | 0.0075793 | 55282      | 63                            | 61                              | 123                             |
| SVK  | 2008 | country | 4_Eur   | Slovakia | 191 | 220 | 411 | 0.0034224 | 0.0039421 | 0.0073645 | 55809      | 64                            | 50                              | 114                             |
| SVK  | 2009 | country | 4_Eur   | Slovakia | 191 | 211 | 402 | 0.0033804 | 0.0037343 | 0.0071147 | 56503      | 78                            | 57                              | 136                             |
| SVK  | 2010 | country | 4_Eur   | Slovakia | 190 | 204 | 394 | 0.0033557 | 0.0036029 | 0.0069586 | 56620      | 63                            | 68                              | 131                             |
| SVK  | 2011 | country | 4_Eur   | Slovakia | 189 | 196 | 385 | 0.0033313 | 0.0034547 | 0.006786  | 56735      | 66                            | 62                              | 128                             |
| SVK  | 2012 | country | 4_Eur   | Slovakia | 187 | 190 | 377 | 0.0032778 | 0.0033303 | 0.0066081 | 57051      | 58                            | 54                              | 112                             |
| SVK  | 2013 | country | 4_Eur   | Slovakia | 183 | 186 | 369 | 0.0032049 | 0.0032575 | 0.0064624 | 57100      | 70                            | 70                              | 140                             |
| SVK  | 2014 | country | 4_Eur   | Slovakia | 179 | 183 | 362 | 0.0031382 | 0.0032083 | 0.0063465 | 57039      | 61                            | 64                              | 125                             |
| SVK  | 2015 | country | 4_Eur   | Slovakia | 175 | 180 | 355 | 0.0030524 | 0.0031396 | 0.0061919 | 57333      | 60                            | 61                              | 121                             |
| SVK  | 2016 | country | 4_Eur   | Slovakia | 171 | 177 | 348 | 0.0029868 | 0.0030916 | 0.0060785 | 57251      | 61                            | 60                              | 120                             |
| SVK  | 2017 | country | 4_Eur   | Slovakia | 169 | 172 | 341 | 0.0029662 | 0.0030188 | 0.005985  | 56976      | 58                            | 58                              | 116                             |
| SVK  | 2018 | country | 4_Eur   | Slovakia | 166 | 168 | 334 | 0.0029319 | 0.0029672 | 0.0058992 | 56618      | 58                            | 57                              | 115                             |
| SVK  | 2019 | country | 4_Eur   | Slovakia | 164 | 161 | 325 | 0.00292   | 0.0028666 | 0.0057866 | 56164      | 57                            | 54                              | 112                             |
| SVN  | 2000 | country | 4_Eur   | Slovenia | 57  | 40  | 97  | 0.0032593 | 0.0022873 | 0.0055466 | 17488      | 18                            | 19                              | 38                              |
| SVN  | 2001 | country | 4_Eur   | Slovenia | 54  | 37  | 91  | 0.0031068 | 0.0021287 | 0.0052355 | 17381      | 14                            | 20                              | 34                              |
| SVN  | 2002 | country | 4_Eur   | Slovenia | 51  | 35  | 86  | 0.0029412 | 0.0020184 | 0.0049596 | 17340      | 20                            | 15                              | 35                              |
| SVN  | 2003 | country | 4_Eur   | Slovenia | 49  | 33  | 82  | 0.0027744 | 0.0018685 | 0.0046428 | 17662      | 17                            | 7                               | 24                              |
| SVN  | 2004 | country | 4_Eur   | Slovenia | 47  | 32  | 79  | 0.0025525 | 0.0017379 | 0.0042903 | 18414      | 14                            | 13                              | 27                              |
| SVN  | 2005 | country | 4_Eur   | Slovenia | 46  | 31  | 77  | 0.0024453 | 0.0016479 | 0.0040932 | 18812      | 11                            | 10                              | 21                              |
| SVN  | 2006 | country | 4_Eur   | Slovenia | 44  | 31  | 75  | 0.0022949 | 0.0016169 | 0.0039118 | 19173      | 9                             | 11                              | 20                              |
| SVN  | 2007 | country | 4_Eur   | Slovenia | 43  | 30  | 73  | 0.002157  | 0.0015049 | 0.0036619 | 19935      | 20                            | 8                               | 28                              |
| SVN  | 2008 | country | 4_Eur   | Slovenia | 41  | 31  | 72  | 0.0019815 | 0.0014982 | 0.0034797 | 20691      | 9                             | 8                               | 17                              |
| SVN  | 2009 | country | 4_Eur   | Slovenia | 40  | 30  | 70  | 0.0019098 | 0.0014324 | 0.0033422 | 20944      | 10                            | 9                               | 18                              |
| SVN  | 2010 | country | 4_Eur   | Slovenia | 38  | 29  | 67  | 0.0018014 | 0.0013748 | 0.0031762 | 21095      | 4                             | 4                               | 8                               |
| SVN  | 2011 | country | 4_Eur   | Slovenia | 36  | 29  | 65  | 0.0016548 | 0.001333  | 0.0029878 | 21755      | 8                             | 9                               | 17                              |
| SVN  | 2012 | country | 4_Eur   | Slovenia | 34  | 28  | 62  | 0.0015611 | 0.0012856 | 0.0028467 | 21780      | 15                            | 9                               | 23                              |
| SVN  | 2013 | country | 4_Eur   | Slovenia | 32  | 27  | 59  | 0.0014751 | 0.0012447 | 0.0027198 | 21693      | 12                            | 1                               | 14                              |
| SVN  | 2014 | country | 4_Eur   | Slovenia | 31  | 25  | 56  | 0.0014438 | 0.0011643 | 0.0026081 | 21471      | 10                            | 10                              | 20                              |
| SVN  | 2015 | country | 4_Eur   | Slovenia | 29  | 24  | 53  | 0.0013725 | 0.0011359 | 0.0025084 | 21129      | 8                             | 5                               | 13                              |
| SVN  | 2016 | country | 4_Eur   | Slovenia | 27  | 23  | 50  | 0.0013053 | 0.0011119 | 0.0024172 | 20685      | 9                             | 5                               | 14                              |
| SVN  | 2017 | country | 4_Eur   | Slovenia | 26  | 21  | 47  | 0.0012924 | 0.0010439 | 0.0023363 | 20117      | 8                             | 4                               | 13                              |
| SVN  | 2018 | country | 4_Eur   | Slovenia | 24  | 20  | 44  | 0.001186  | 0.0009883 | 0.0021743 | 20236      | 8                             | 4                               | 12                              |
| SVN  | 2019 | country | 4_Eur   | Slovenia | 23  | 19  | 42  | 0.0011873 | 0.0009808 | 0.0021681 | 19372      | 7                             | 4                               | 12                              |

| iso3 | year | level   | whoreg6 | whoname  | nnd | pnd  | u5d  | nmr       | pnmr      | u5mr      | Livebirths | Neonatal birth defects deaths | 1-59 month birth defects deaths | Under five birth defects deaths |
|------|------|---------|---------|----------|-----|------|------|-----------|-----------|-----------|------------|-------------------------------|---------------------------------|---------------------------------|
| SWE  | 2000 | country | 4_Eur   | Sweden   | 213 | 166  | 379  | 0.002332  | 0.0018174 | 0.0041494 | 91338      | 92                            | 78                              | 171                             |
| SWE  | 2001 | country | 4_Eur   | Sweden   | 213 | 162  | 375  | 0.0022969 | 0.0017469 | 0.0040438 | 92734      | 75                            | 54                              | 128                             |
| SWE  | 2002 | country | 4_Eur   | Sweden   | 213 | 160  | 373  | 0.002243  | 0.0016849 | 0.0039279 | 94961      | 70                            | 51                              | 121                             |
| SWE  | 2003 | country | 4_Eur   | Sweden   | 210 | 161  | 371  | 0.0021524 | 0.0016502 | 0.0038026 | 97564      | 73                            | 46                              | 119                             |
| SWE  | 2004 | country | 4_Eur   | Sweden   | 205 | 162  | 367  | 0.0020456 | 0.0016165 | 0.0036621 | 100216     | 86                            | 37                              | 124                             |
| SWE  | 2005 | country | 4_Eur   | Sweden   | 199 | 162  | 361  | 0.0019344 | 0.0015747 | 0.0035091 | 102875     | 67                            | 46                              | 113                             |
| SWE  | 2006 | country | 4_Eur   | Sweden   | 195 | 161  | 356  | 0.0018459 | 0.0015241 | 0.00337   | 105638     | 71                            | 56                              | 127                             |
| SWE  | 2007 | country | 4_Eur   | Sweden   | 192 | 158  | 350  | 0.0017785 | 0.0014636 | 0.0032421 | 107955     | 70                            | 48                              | 118                             |
| SWE  | 2008 | country | 4_Eur   | Sweden   | 189 | 157  | 346  | 0.0017216 | 0.0014301 | 0.0031517 | 109784     | 61                            | 53                              | 114                             |
| SWE  | 2009 | country | 4_Eur   | Sweden   | 185 | 158  | 343  | 0.0016619 | 0.0014193 | 0.0030812 | 111320     | 61                            | 46                              | 107                             |
| SWE  | 2010 | country | 4_Eur   | Sweden   | 183 | 158  | 341  | 0.0016271 | 0.0014048 | 0.003032  | 112468     | 59                            | 43                              | 102                             |
| SWE  | 2011 | country | 4_Eur   | Sweden   | 182 | 157  | 339  | 0.0015981 | 0.0013786 | 0.0029767 | 113884     | 55                            | 37                              | 92                              |
| SWE  | 2012 | country | 4_Eur   | Sweden   | 183 | 155  | 338  | 0.0015986 | 0.001354  | 0.0029526 | 114477     | 47                            | 43                              | 90                              |
| SWE  | 2013 | country | 4_Eur   | Sweden   | 185 | 152  | 337  | 0.0016062 | 0.0013197 | 0.0029259 | 115180     | 61                            | 48                              | 109                             |
| SWE  | 2014 | country | 4_Eur   | Sweden   | 186 | 150  | 336  | 0.0016041 | 0.0012936 | 0.0028977 | 115953     | 53                            | 45                              | 98                              |
| SWE  | 2015 | country | 4_Eur   | Sweden   | 185 | 148  | 333  | 0.0015877 | 0.0012702 | 0.0028579 | 116520     | 44                            | 33                              | 77                              |
| SWE  | 2016 | country | 4_Eur   | Sweden   | 183 | 146  | 329  | 0.0015609 | 0.0012453 | 0.0028062 | 117241     | 53                            | 50                              | 103                             |
| SWE  | 2017 | country | 4_Eur   | Sweden   | 178 | 144  | 322  | 0.0015125 | 0.0012236 | 0.0027361 | 117684     | 48                            | 42                              | 90                              |
| SWE  | 2018 | country | 4_Eur   | Sweden   | 172 | 142  | 314  | 0.0014505 | 0.0011975 | 0.0026481 | 118577     | 46                            | 41                              | 87                              |
| SWE  | 2019 | country | 4_Eur   | Sweden   | 165 | 140  | 305  | 0.0013815 | 0.0011722 | 0.0025537 | 119433     | 45                            | 41                              | 86                              |
| SWZ  | 2000 | country | 1_Afr   | Eswatini | 695 | 2829 | 3524 | 0.021571  | 0.0878047 | 0.1093757 | 32219      | 48                            | 52                              | 99                              |
| SWZ  | 2001 | country | 1_Afr   | Eswatini | 693 | 2931 | 3624 | 0.0214311 | 0.0906414 | 0.1120725 | 32336      | 49                            | 52                              | 101                             |
| SWZ  | 2002 | country | 1_Afr   | Eswatini | 688 | 3000 | 3688 | 0.0211816 | 0.0923615 | 0.113543  | 32481      | 49                            | 52                              | 101                             |
| SWZ  | 2003 | country | 1_Afr   | Eswatini | 680 | 3065 | 3745 | 0.0207915 | 0.0937147 | 0.1145062 | 32706      | 50                            | 52                              | 101                             |
| SWZ  | 2004 | country | 1_Afr   | Eswatini | 672 | 3112 | 3784 | 0.0204068 | 0.094503  | 0.1149099 | 32930      | 49                            | 52                              | 101                             |
| SWZ  | 2005 | country | 1_Afr   | Eswatini | 663 | 3142 | 3805 | 0.0200103 | 0.09483   | 0.1148403 | 33133      | 50                            | 51                              | 102                             |
| SWZ  | 2006 | country | 1_Afr   | Eswatini | 655 | 2898 | 3553 | 0.0197164 | 0.0872336 | 0.1069499 | 33221      | 50                            | 60                              | 109                             |
| SWZ  | 2007 | country | 1_Afr   | Eswatini | 650 | 2788 | 3438 | 0.0195693 | 0.0839373 | 0.1035066 | 33215      | 50                            | 65                              | 115                             |
| SWZ  | 2008 | country | 1_Afr   | Eswatini | 647 | 2734 | 3381 | 0.0195683 | 0.082689  | 0.1022573 | 33064      | 51                            | 66                              | 116                             |
| SWZ  | 2009 | country | 1_Afr   | Eswatini | 644 | 2519 | 3163 | 0.0196572 | 0.0768888 | 0.0965459 | 32762      | 51                            | 72                              | 124                             |
| SWZ  | 2010 | country | 1_Afr   | Eswatini | 641 | 2169 | 2810 | 0.019812  | 0.0670393 | 0.0868513 | 32354      | 51                            | 82                              | 134                             |
| SWZ  | 2011 | country | 1_Afr   | Eswatini | 636 | 1832 | 2468 | 0.0199358 | 0.057425  | 0.0773608 | 31902      | 52                            | 77                              | 129                             |
| SWZ  | 2012 | country | 1_Afr   | Eswatini | 630 | 1614 | 2244 | 0.0200485 | 0.0513622 | 0.0714107 | 31424      | 52                            | 82                              | 134                             |
| SWZ  | 2013 | country | 1_Afr   | Eswatini | 621 | 1503 | 2124 | 0.0199822 | 0.0483628 | 0.0683451 | 31078      | 52                            | 97                              | 149                             |
| SWZ  | 2014 | country | 1_Afr   | Eswatini | 611 | 1454 | 2065 | 0.0198731 | 0.0472922 | 0.0671654 | 30745      | 53                            | 104                             | 156                             |
| SWZ  | 2015 | country | 1_Afr   | Eswatini | 600 | 1210 | 1810 | 0.0196431 | 0.0396135 | 0.0592566 | 30545      | 52                            | 96                              | 147                             |
| SWZ  | 2016 | country | 1_Afr   | Eswatini | 588 | 1203 | 1791 | 0.0193792 | 0.0396482 | 0.0590274 | 30342      | 52                            | 94                              | 145                             |
| SWZ  | 2017 | country | 1_Afr   | Eswatini | 576 | 1308 | 1884 | 0.0190924 | 0.0433558 | 0.0624482 | 30169      | 51                            | 85                              | 136                             |
| SWZ  | 2018 | country | 1_Afr   | Eswatini | 562 | 1097 | 1659 | 0.0187578 | 0.0366145 | 0.0553723 | 29961      | 50                            | 88                              | 138                             |
| SWZ  | 2019 | country | 1_Afr   | Eswatini | 548 | 920  | 1468 | 0.0184217 | 0.0309269 | 0.0493486 | 29748      | 50                            | 89                              | 139                             |

| iso3 | year | level   | whoreg6 | whoname           | nnd  | pnd  | u5d   | nmr       | pnmr      | u5mr      | Livebirths | Neonatal birth defects deaths | 1-59 month birth defects deaths | Under five birth defects deaths |
|------|------|---------|---------|-------------------|------|------|-------|-----------|-----------|-----------|------------|-------------------------------|---------------------------------|---------------------------------|
| SYC  | 2000 | country | 1_Afr   | Seychelles        | 13   | 8    | 21    | 0.0086941 | 0.0053502 | 0.0140443 | 1495       | 3                             | 2                               | 5                               |
| SYC  | 2001 | country | 1_Afr   | Seychelles        | 14   | 7    | 21    | 0.0086884 | 0.0043442 | 0.0130326 | 1611       | 3                             | 2                               | 5                               |
| SYC  | 2002 | country | 1_Afr   | Seychelles        | 14   | 8    | 22    | 0.0086825 | 0.0049614 | 0.0136439 | 1612       | 3                             | 2                               | 5                               |
| SYC  | 2003 | country | 1_Afr   | Seychelles        | 14   | 8    | 22    | 0.0086708 | 0.0049548 | 0.0136256 | 1615       | 3                             | 2                               | 5                               |
| SYC  | 2004 | country | 1_Afr   | Seychelles        | 14   | 8    | 22    | 0.0086658 | 0.0049519 | 0.0136176 | 1616       | 3                             | 2                               | 5                               |
| SYC  | 2005 | country | 1_Afr   | Seychelles        | 15   | 8    | 23    | 0.0086481 | 0.0046123 | 0.0132604 | 1734       | 3                             | 2                               | 5                               |
| SYC  | 2006 | country | 1_Afr   | Seychelles        | 15   | 8    | 23    | 0.0086295 | 0.0046024 | 0.013232  | 1738       | 3                             | 2                               | 5                               |
| SYC  | 2007 | country | 1_Afr   | Seychelles        | 15   | 8    | 23    | 0.008623  | 0.0045989 | 0.0132219 | 1740       | 3                             | 2                               | 5                               |
| SYC  | 2008 | country | 1_Afr   | Seychelles        | 15   | 9    | 24    | 0.0086367 | 0.005182  | 0.0138186 | 1737       | 3                             | 2                               | 6                               |
| SYC  | 2009 | country | 1_Afr   | Seychelles        | 15   | 9    | 24    | 0.0086665 | 0.0051999 | 0.0138664 | 1731       | 3                             | 2                               | 6                               |
| SYC  | 2010 | country | 1_Afr   | Seychelles        | 15   | 9    | 24    | 0.0087072 | 0.0052243 | 0.0139315 | 1723       | 3                             | 2                               | 6                               |
| SYC  | 2011 | country | 1_Afr   | Seychelles        | 15   | 9    | 24    | 0.0087487 | 0.0052492 | 0.013998  | 1715       | 3                             | 2                               | 6                               |
| SYC  | 2012 | country | 1_Afr   | Seychelles        | 15   | 9    | 24    | 0.008805  | 0.005283  | 0.014088  | 1704       | 3                             | 2                               | 6                               |
| SYC  | 2013 | country | 1_Afr   | Seychelles        | 15   | 9    | 24    | 0.0088719 | 0.0053231 | 0.014195  | 1691       | 3                             | 2                               | 6                               |
| SYC  | 2014 | country | 1_Afr   | Seychelles        | 15   | 9    | 24    | 0.0089372 | 0.0053623 | 0.0142996 | 1678       | 3                             | 2                               | 6                               |
| SYC  | 2015 | country | 1_Afr   | Seychelles        | 15   | 9    | 24    | 0.0089782 | 0.0053869 | 0.0143651 | 1671       | 3                             | 2                               | 6                               |
| SYC  | 2016 | country | 1_Afr   | Seychelles        | 15   | 9    | 24    | 0.0089839 | 0.0053903 | 0.0143742 | 1670       | 3                             | 2                               | 6                               |
| SYC  | 2017 | country | 1_Afr   | Seychelles        | 14   | 10   | 24    | 0.0089209 | 0.0063721 | 0.015293  | 1569       | 3                             | 3                               | 6                               |
| SYC  | 2018 | country | 1_Afr   | Seychelles        | 14   | 9    | 23    | 0.0087984 | 0.0056561 | 0.0144544 | 1591       | 3                             | 2                               | 5                               |
| SYC  | 2019 | country | 1_Afr   | Seychelles        | 14   | 9    | 23    | 0.00861   | 0.005535  | 0.014145  | 1626       | 3                             | 2                               | 5                               |
| SYR  | 2000 | country | 5_Emr   | Syrian Arab Repub | 6257 | 5335 | 11592 | 0.0122099 | 0.010411  | 0.0226209 | 512454     | 1075                          | 1393                            | 2468                            |
| SYR  | 2001 | country | 5_Emr   | Syrian Arab Repub | 6182 | 5155 | 11337 | 0.0118639 | 0.0098923 | 0.0217562 | 521077     | 1115                          | 1421                            | 2536                            |
| SYR  | 2002 | country | 5_Emr   | Syrian Arab Repub | 6136 | 5023 | 11159 | 0.0115415 | 0.0094476 | 0.0209891 | 531647     | 1131                          | 1424                            | 2555                            |
| SYR  | 2003 | country | 5_Emr   | Syrian Arab Repub | 6125 | 4974 | 11099 | 0.0112564 | 0.009142  | 0.0203985 | 544133     | 1150                          | 1436                            | 2586                            |
| SYR  | 2004 | country | 5_Emr   | Syrian Arab Repub | 6139 | 4913 | 11052 | 0.0110057 | 0.0088082 | 0.0198139 | 557804     | 1211                          | 1454                            | 2665                            |
| SYR  | 2005 | country | 5_Emr   | Syrian Arab Repub | 6155 | 4921 | 11076 | 0.0107824 | 0.0086202 | 0.0194026 | 570839     | 1235                          | 1484                            | 2719                            |
| SYR  | 2006 | country | 5_Emr   | Syrian Arab Repub | 6145 | 4979 | 11124 | 0.0105787 | 0.008572  | 0.0191507 | 580886     | 1289                          | 1523                            | 2812                            |
| SYR  | 2007 | country | 5_Emr   | Syrian Arab Repub | 6092 | 5052 | 11144 | 0.0103928 | 0.0086189 | 0.0190116 | 586177     | 1297                          | 1566                            | 2863                            |
| SYR  | 2008 | country | 5_Emr   | Syrian Arab Repub | 6009 | 5063 | 11072 | 0.0102604 | 0.0086458 | 0.0189062 | 585649     | 1286                          | 1599                            | 2885                            |
| SYR  | 2009 | country | 5_Emr   | Syrian Arab Repub | 5883 | 5109 | 10992 | 0.0101648 | 0.0088267 | 0.0189914 | 578763     | 1270                          | 1625                            | 2895                            |
| SYR  | 2010 | country | 5_Emr   | Syrian Arab Repub | 5725 | 5123 | 10848 | 0.0101159 | 0.0090529 | 0.0191688 | 565940     | 1230                          | 1638                            | 2868                            |
| SYR  | 2011 | country | 5_Emr   | Syrian Arab Repub | 5542 | 5271 | 10813 | 0.0101154 | 0.0096212 | 0.0197366 | 547878     | 1184                          | 1634                            | 2818                            |
| SYR  | 2012 | country | 5_Emr   | Syrian Arab Repub | 5371 | 6482 | 11853 | 0.010199  | 0.0123086 | 0.0225077 | 526618     | 1144                          | 1605                            | 2749                            |
| SYR  | 2013 | country | 5_Emr   | Syrian Arab Repub | 5187 | 6969 | 12156 | 0.0102801 | 0.013812  | 0.0240921 | 504567     | 1094                          | 1570                            | 2665                            |
| SYR  | 2014 | country | 5_Emr   | Syrian Arab Repub | 5016 | 7090 | 12106 | 0.010385  | 0.014678  | 0.025063  | 483003     | 1021                          | 1531                            | 2552                            |
| SYR  | 2015 | country | 5_Emr   | Syrian Arab Repub | 4860 | 6365 | 11225 | 0.0104846 | 0.013732  | 0.0242166 | 463538     | 1009                          | 1492                            | 2501                            |
| SYR  | 2016 | country | 5_Emr   | Syrian Arab Repub | 4742 | 6084 | 10826 | 0.010595  | 0.0135934 | 0.0241884 | 447568     | 972                           | 1454                            | 2426                            |
| SYR  | 2017 | country | 5_Emr   | Syrian Arab Repub | 4667 | 5657 | 10324 | 0.0107235 | 0.0129974 | 0.0237208 | 435214     | 956                           | 1417                            | 2372                            |
| SYR  | 2018 | country | 5_Emr   | Syrian Arab Repub | 4599 | 5038 | 9637  | 0.010783  | 0.0118122 | 0.0225952 | 426504     | 950                           | 1381                            | 2331                            |
| SYR  | 2019 | country | 5_Emr   | Syrian Arab Repub | 4545 | 4650 | 9195  | 0.0107774 | 0.0110264 | 0.0218038 | 421715     | 935                           | 1353                            | 2288                            |

| iso3 | year | level   | whoreg6 | whoname | nnd   | pnd   | u5d   | nmr       | pnmr      | u5mr      | Livebirths | Neonatal birth defects deaths | 1-59 month birth defects deaths | Under five birth defects deaths |
|------|------|---------|---------|---------|-------|-------|-------|-----------|-----------|-----------|------------|-------------------------------|---------------------------------|---------------------------------|
| TCD  | 2000 | country | 1_Afr   | Chad    | 18979 | 53760 | 72739 | 0.0443579 | 0.1256493 | 0.1700072 | 427860     | 567                           | 46                              | 613                             |
| TCD  | 2001 | country | 1_Afr   | Chad    | 19161 | 63149 | 82310 | 0.0433546 | 0.1428842 | 0.1862388 | 441960     | 569                           | 73                              | 643                             |
| TCD  | 2002 | country | 1_Afr   | Chad    | 19347 | 60414 | 79761 | 0.0424224 | 0.1324698 | 0.1748923 | 456056     | 591                           | 53                              | 644                             |
| TCD  | 2003 | country | 1_Afr   | Chad    | 19559 | 64114 | 83673 | 0.0416133 | 0.1364078 | 0.178021  | 470018     | 609                           | 86                              | 695                             |
| TCD  | 2004 | country | 1_Afr   | Chad    | 19754 | 64390 | 84144 | 0.0408354 | 0.1331071 | 0.1739425 | 483747     | 626                           | 79                              | 706                             |
| TCD  | 2005 | country | 1_Afr   | Chad    | 19956 | 61948 | 81904 | 0.0401421 | 0.1246098 | 0.1647519 | 497134     | 634                           | 114                             | 747                             |
| TCD  | 2006 | country | 1_Afr   | Chad    | 20179 | 58462 | 78641 | 0.0395591 | 0.1146094 | 0.1541686 | 510097     | 658                           | 108                             | 766                             |
| TCD  | 2007 | country | 1_Afr   | Chad    | 20431 | 57493 | 77924 | 0.0390921 | 0.1100054 | 0.1490976 | 522637     | 680                           | 144                             | 824                             |
| TCD  | 2008 | country | 1_Afr   | Chad    | 20711 | 59805 | 80516 | 0.0387215 | 0.1118116 | 0.1505331 | 534871     | 685                           | 140                             | 825                             |
| TCD  | 2009 | country | 1_Afr   | Chad    | 20984 | 57070 | 78054 | 0.0383776 | 0.1043755 | 0.1427531 | 546778     | 717                           | 187                             | 904                             |
| TCD  | 2010 | country | 1_Afr   | Chad    | 21245 | 56524 | 77769 | 0.0380405 | 0.10121   | 0.1392506 | 558483     | 726                           | 257                             | 982                             |
| TCD  | 2011 | country | 1_Afr   | Chad    | 21431 | 59187 | 80618 | 0.0375919 | 0.10382   | 0.1414119 | 570097     | 730                           | 343                             | 1074                            |
| TCD  | 2012 | country | 1_Afr   | Chad    | 21597 | 57762 | 79359 | 0.0371283 | 0.0993017 | 0.13643   | 581686     | 750                           | 307                             | 1056                            |
| TCD  | 2013 | country | 1_Afr   | Chad    | 21737 | 55272 | 77009 | 0.0366329 | 0.093149  | 0.1297819 | 593374     | 757                           | 284                             | 1041                            |
| TCD  | 2014 | country | 1_Afr   | Chad    | 21866 | 56781 | 78647 | 0.0361309 | 0.093823  | 0.1299539 | 605189     | 781                           | 224                             | 1004                            |
| TCD  | 2015 | country | 1_Afr   | Chad    | 21959 | 53936 | 75895 | 0.0355825 | 0.0873987 | 0.1229812 | 617130     | 790                           | 243                             | 1033                            |
| TCD  | 2016 | country | 1_Afr   | Chad    | 22047 | 55150 | 77197 | 0.0350405 | 0.0876531 | 0.1226936 | 629187     | 818                           | 201                             | 1019                            |
| TCD  | 2017 | country | 1_Afr   | Chad    | 22112 | 52594 | 74706 | 0.0344832 | 0.082019  | 0.1165022 | 641240     | 813                           | 209                             | 1022                            |
| TCD  | 2018 | country | 1_Afr   | Chad    | 22137 | 52997 | 75134 | 0.0338878 | 0.0811289 | 0.1150167 | 653244     | 838                           | 222                             | 1060                            |
| TCD  | 2019 | country | 1_Afr   | Chad    | 22123 | 52433 | 74556 | 0.03326   | 0.0788287 | 0.1120887 | 665154     | 847                           | 231                             | 1079                            |
| TGO  | 2000 | country | 1_Afr   | Togo    | 7073  | 16666 | 23739 | 0.0361878 | 0.0852706 | 0.1214584 | 195453     | 331                           | 59                              | 390                             |
| TGO  | 2001 | country | 1_Afr   | Togo    | 7117  | 15911 | 23028 | 0.0354022 | 0.0791463 | 0.1145485 | 201033     | 337                           | 40                              | 377                             |
| TGO  | 2002 | country | 1_Afr   | Togo    | 7153  | 14292 | 21445 | 0.0346409 | 0.0692124 | 0.1038533 | 206490     | 344                           | 51                              | 394                             |
| TGO  | 2003 | country | 1_Afr   | Togo    | 7180  | 14468 | 21648 | 0.0339085 | 0.0683292 | 0.1022377 | 211746     | 355                           | 83                              | 438                             |
| TGO  | 2004 | country | 1_Afr   | Togo    | 7183  | 14462 | 21645 | 0.0331538 | 0.0667491 | 0.0999029 | 216657     | 358                           | 81                              | 439                             |
| TGO  | 2005 | country | 1_Afr   | Togo    | 7176  | 14214 | 21390 | 0.032439  | 0.0642555 | 0.0966945 | 221215     | 359                           | 78                              | 437                             |
| TGO  | 2006 | country | 1_Afr   | Togo    | 7160  | 14165 | 21325 | 0.0317717 | 0.0628537 | 0.0946254 | 225358     | 366                           | 103                             | 469                             |
| TGO  | 2007 | country | 1_Afr   | Togo    | 7128  | 14079 | 21207 | 0.0311058 | 0.0614386 | 0.0925444 | 229154     | 373                           | 105                             | 477                             |
| TGO  | 2008 | country | 1_Afr   | Togo    | 7086  | 14001 | 21087 | 0.0304524 | 0.0601697 | 0.090622  | 232691     | 369                           | 116                             | 485                             |
| TGO  | 2009 | country | 1_Afr   | Togo    | 7035  | 13714 | 20749 | 0.0298102 | 0.0581101 | 0.0879203 | 235993     | 363                           | 158                             | 521                             |
| TGO  | 2010 | country | 1_Afr   | Togo    | 6982  | 13551 | 20533 | 0.029202  | 0.0566776 | 0.0858797 | 239093     | 359                           | 185                             | 544                             |
| TGO  | 2011 | country | 1_Afr   | Togo    | 6930  | 13186 | 20116 | 0.028636  | 0.054485  | 0.083121  | 242003     | 359                           | 214                             | 572                             |
| TGO  | 2012 | country | 1_Afr   | Togo    | 6876  | 13037 | 19913 | 0.0280964 | 0.0532692 | 0.0813656 | 244729     | 360                           | 197                             | 557                             |
| TGO  | 2013 | country | 1_Afr   | Togo    | 6833  | 12914 | 19747 | 0.0276168 | 0.0521948 | 0.0798116 | 247422     | 357                           | 173                             | 530                             |
| TGO  | 2014 | country | 1_Afr   | Togo    | 6782  | 12355 | 19137 | 0.0271246 | 0.0494152 | 0.0765398 | 250031     | 355                           | 228                             | 584                             |
| TGO  | 2015 | country | 1_Afr   | Togo    | 6738  | 12107 | 18845 | 0.0266617 | 0.047906  | 0.0745677 | 252722     | 360                           | 282                             | 643                             |
| TGO  | 2016 | country | 1_Afr   | Togo    | 6694  | 11763 | 18457 | 0.0262035 | 0.0460474 | 0.0722509 | 255462     | 360                           | 512                             | 872                             |
| TGO  | 2017 | country | 1_Afr   | Togo    | 6653  | 11511 | 18164 | 0.0257526 | 0.0445586 | 0.0703113 | 258342     | 360                           | 439                             | 799                             |
| TGO  | 2018 | country | 1_Afr   | Togo    | 6612  | 11299 | 17911 | 0.0253009 | 0.0432361 | 0.068537  | 261335     | 363                           | 389                             | 753                             |
| TGO  | 2019 | country | 1_Afr   | Togo    | 6563  | 10725 | 17288 | 0.0248118 | 0.0405483 | 0.0653601 | 264511     | 363                           | 388                             | 751                             |

| iso3 | year | level   | whoreg6 | whoname    | nnd   | pnd   | u5d   | nmr       | pnmr      | u5mr      | Livebirths | Neonatal birth defects deaths | 1-59 month birth defects deaths | Under five birth defects deaths |
|------|------|---------|---------|------------|-------|-------|-------|-----------|-----------|-----------|------------|-------------------------------|---------------------------------|---------------------------------|
| THA  | 2000 | country | 3_Sear  | Thailand   | 11716 | 8569  | 20285 | 0.0128409 | 0.0093913 | 0.0222322 | 912397     | 2151                          | 1289                            | 3440                            |
| THA  | 2001 | country | 3_Sear  | Thailand   | 10922 | 8041  | 18963 | 0.0122016 | 0.0089832 | 0.0211848 | 895132     | 2102                          | 1254                            | 3356                            |
| THA  | 2002 | country | 3_Sear  | Thailand   | 10218 | 7557  | 17775 | 0.0116182 | 0.0085921 | 0.0202103 | 879481     | 2104                          | 1232                            | 3336                            |
| THA  | 2003 | country | 3_Sear  | Thailand   | 9594  | 6991  | 16585 | 0.0110855 | 0.0080778 | 0.0191632 | 865458     | 2040                          | 1229                            | 3268                            |
| THA  | 2004 | country | 3_Sear  | Thailand   | 9009  | 6533  | 15542 | 0.0105625 | 0.0076591 | 0.0182216 | 852921     | 1969                          | 1225                            | 3194                            |
| THA  | 2005 | country | 3_Sear  | Thailand   | 8472  | 6130  | 14602 | 0.0100643 | 0.0072819 | 0.0173462 | 841784     | 1945                          | 1258                            | 3203                            |
| THA  | 2006 | country | 3_Sear  | Thailand   | 7970  | 5770  | 13740 | 0.0095872 | 0.0069409 | 0.0165282 | 831314     | 1790                          | 1256                            | 3046                            |
| THA  | 2007 | country | 3_Sear  | Thailand   | 7511  | 5426  | 12937 | 0.0091449 | 0.0066067 | 0.0157516 | 821332     | 1736                          | 1231                            | 2967                            |
| THA  | 2008 | country | 3_Sear  | Thailand   | 7079  | 5167  | 12246 | 0.008727  | 0.00637   | 0.015097  | 811158     | 1709                          | 1228                            | 2937                            |
| THA  | 2009 | country | 3_Sear  | Thailand   | 6670  | 4855  | 11525 | 0.0083291 | 0.0060622 | 0.0143912 | 800811     | 1613                          | 1220                            | 2833                            |
| THA  | 2010 | country | 3_Sear  | Thailand   | 6284  | 4545  | 10829 | 0.0079502 | 0.0057503 | 0.0137005 | 790421     | 1571                          | 1186                            | 2756                            |
| THA  | 2011 | country | 3_Sear  | Thailand   | 5922  | 4278  | 10200 | 0.0075918 | 0.0054846 | 0.0130764 | 780050     | 1500                          | 1151                            | 2650                            |
| THA  | 2012 | country | 3_Sear  | Thailand   | 5594  | 4056  | 9650  | 0.0072622 | 0.0052661 | 0.0125283 | 770288     | 1441                          | 1107                            | 2548                            |
| THA  | 2013 | country | 3_Sear  | Thailand   | 5288  | 3803  | 9091  | 0.0069463 | 0.0049954 | 0.0119417 | 761271     | 1405                          | 1067                            | 2473                            |
| THA  | 2014 | country | 3_Sear  | Thailand   | 4992  | 3577  | 8569  | 0.0066316 | 0.004752  | 0.0113836 | 752756     | 1351                          | 1031                            | 2381                            |
| THA  | 2015 | country | 3_Sear  | Thailand   | 4723  | 3363  | 8086  | 0.0063443 | 0.0045174 | 0.0108618 | 744442     | 1283                          | 997                             | 2281                            |
| THA  | 2016 | country | 3_Sear  | Thailand   | 4469  | 3170  | 7639  | 0.0060702 | 0.004306  | 0.0103762 | 736221     | 1217                          | 958                             | 2175                            |
| THA  | 2017 | country | 3_Sear  | Thailand   | 4219  | 2999  | 7218  | 0.0058003 | 0.0041234 | 0.0099237 | 727379     | 1158                          | 921                             | 2079                            |
| THA  | 2018 | country | 3_Sear  | Thailand   | 3980  | 2900  | 6880  | 0.0055444 | 0.0040397 | 0.0095842 | 717836     | 1102                          | 882                             | 1983                            |
| THA  | 2019 | country | 3_Sear  | Thailand   | 3759  | 2709  | 6468  | 0.0053116 | 0.0038274 | 0.009139  | 707697     | 1031                          | 841                             | 1872                            |
| TJK  | 2000 | country | 4_Eur   | Tajikistan | 5417  | 10472 | 15889 | 0.0284013 | 0.0549047 | 0.083306  | 190731     | 502                           | 659                             | 1161                            |
| TJK  | 2001 | country | 4_Eur   | Tajikistan | 5193  | 9412  | 14605 | 0.0272658 | 0.0494176 | 0.0766834 | 190458     | 493                           | 650                             | 1143                            |
| TJK  | 2002 | country | 4_Eur   | Tajikistan | 4970  | 8490  | 13460 | 0.0259587 | 0.0443439 | 0.0703025 | 191458     | 477                           | 655                             | 1132                            |
| TJK  | 2003 | country | 4_Eur   | Tajikistan | 4807  | 7658  | 12465 | 0.0248097 | 0.0395241 | 0.0643338 | 193755     | 478                           | 668                             | 1146                            |
| TJK  | 2004 | country | 4_Eur   | Tajikistan | 4708  | 6955  | 11663 | 0.023842  | 0.0352211 | 0.0590631 | 197467     | 465                           | 665                             | 1130                            |
| TJK  | 2005 | country | 4_Eur   | Tajikistan | 4682  | 6327  | 11009 | 0.0231254 | 0.0312504 | 0.0543758 | 202461     | 475                           | 550                             | 1025                            |
| TJK  | 2006 | country | 4_Eur   | Tajikistan | 4708  | 5825  | 10533 | 0.0225656 | 0.0279194 | 0.050485  | 208636     | 479                           | 500                             | 979                             |
| TJK  | 2007 | country | 4_Eur   | Tajikistan | 4769  | 5454  | 10223 | 0.0221119 | 0.0252879 | 0.0473998 | 215676     | 501                           | 526                             | 1027                            |
| TJK  | 2008 | country | 4_Eur   | Tajikistan | 4822  | 5206  | 10028 | 0.0215999 | 0.02332   | 0.0449199 | 223242     | 506                           | 542                             | 1048                            |
| TJK  | 2009 | country | 4_Eur   | Tajikistan | 4841  | 5104  | 9945  | 0.0209621 | 0.0221009 | 0.043063  | 230941     | 523                           | 591                             | 1114                            |
| TJK  | 2010 | country | 4_Eur   | Tajikistan | 4820  | 5099  | 9919  | 0.0201931 | 0.021362  | 0.0415551 | 238695     | 519                           | 670                             | 1190                            |
| TJK  | 2011 | country | 4_Eur   | Tajikistan | 4748  | 5196  | 9944  | 0.0192801 | 0.0210993 | 0.0403794 | 246264     | 517                           | 748                             | 1265                            |
| TJK  | 2012 | country | 4_Eur   | Tajikistan | 4652  | 5340  | 9992  | 0.0183411 | 0.0210536 | 0.0393947 | 253638     | 522                           | 712                             | 1233                            |
| TJK  | 2013 | country | 4_Eur   | Tajikistan | 4550  | 5495  | 10045 | 0.0174606 | 0.021087  | 0.0385475 | 260587     | 525                           | 705                             | 1230                            |
| TJK  | 2014 | country | 4_Eur   | Tajikistan | 4471  | 5598  | 10069 | 0.0167504 | 0.0209726 | 0.037723  | 266920     | 526                           | 810                             | 1336                            |
| TJK  | 2015 | country | 4_Eur   | Tajikistan | 4413  | 5641  | 10054 | 0.0162132 | 0.0207249 | 0.0369381 | 272185     | 535                           | 813                             | 1348                            |
| TJK  | 2016 | country | 4_Eur   | Tajikistan | 4368  | 5617  | 9985  | 0.0158186 | 0.0203418 | 0.0361604 | 276131     | 545                           | 807                             | 1352                            |
| TJK  | 2017 | country | 4_Eur   | Tajikistan | 4335  | 5503  | 9838  | 0.0155612 | 0.019754  | 0.0353152 | 278577     | 546                           | 806                             | 1352                            |
| TJK  | 2018 | country | 4_Eur   | Tajikistan | 4277  | 5359  | 9636  | 0.0152979 | 0.019168  | 0.034466  | 279580     | 545                           | 779                             | 1323                            |
| TJK  | 2019 | country | 4_Eur   | Tajikistan | 4183  | 5194  | 9377  | 0.0149777 | 0.0185977 | 0.0335754 | 279282     | 540                           | 750                             | 1290                            |

| iso3 | year | level   | whoreg6 | whoname      | nnd  | pnd  | u5d  | nmr       | pnmr      | u5mr      | Livebirths | Neonatal birth defects deaths | 1-59 month birth defects deaths | Under five birth defects deaths |
|------|------|---------|---------|--------------|------|------|------|-----------|-----------|-----------|------------|-------------------------------|---------------------------------|---------------------------------|
| TKM  | 2000 | country | 4_Eur   | Turkmenistan | 3171 | 4312 | 7483 | 0.0297293 | 0.0404265 | 0.0701558 | 106663     | 329                           | 457                             | 786                             |
| TKM  | 2001 | country | 4_Eur   | Turkmenistan | 3099 | 3917 | 7016 | 0.0291173 | 0.036803  | 0.0659203 | 106432     | 321                           | 456                             | 777                             |
| TKM  | 2002 | country | 4_Eur   | Turkmenistan | 3030 | 3562 | 6592 | 0.0283955 | 0.0333811 | 0.0617766 | 106707     | 322                           | 351                             | 672                             |
| TKM  | 2003 | country | 4_Eur   | Turkmenistan | 2953 | 3265 | 6218 | 0.027543  | 0.0304531 | 0.0579961 | 107214     | 317                           | 408                             | 725                             |
| TKM  | 2004 | country | 4_Eur   | Turkmenistan | 2876 | 3011 | 5887 | 0.026627  | 0.0278769 | 0.0545038 | 108011     | 310                           | 392                             | 702                             |
| TKM  | 2005 | country | 4_Eur   | Turkmenistan | 2809 | 2798 | 5607 | 0.0256801 | 0.0255795 | 0.0512596 | 109384     | 312                           | 393                             | 705                             |
| TKM  | 2006 | country | 4_Eur   | Turkmenistan | 2771 | 2625 | 5396 | 0.0248252 | 0.0235172 | 0.0483424 | 111620     | 308                           | 378                             | 687                             |
| TKM  | 2007 | country | 4_Eur   | Turkmenistan | 2767 | 2506 | 5273 | 0.0240648 | 0.0217948 | 0.0458596 | 114981     | 307                           | 367                             | 675                             |
| TKM  | 2008 | country | 4_Eur   | Turkmenistan | 2802 | 2429 | 5231 | 0.0234733 | 0.0203486 | 0.0438219 | 119369     | 316                           | 363                             | 679                             |
| TKM  | 2009 | country | 4_Eur   | Turkmenistan | 2869 | 2396 | 5265 | 0.0230356 | 0.0192378 | 0.0422734 | 124547     | 331                           | 364                             | 695                             |
| TKM  | 2010 | country | 4_Eur   | Turkmenistan | 2959 | 2397 | 5356 | 0.0227517 | 0.0184305 | 0.0411823 | 130056     | 337                           | 373                             | 710                             |
| TKM  | 2011 | country | 4_Eur   | Turkmenistan | 3058 | 2435 | 5493 | 0.0226155 | 0.0180081 | 0.0406235 | 135217     | 354                           | 385                             | 739                             |
| TKM  | 2012 | country | 4_Eur   | Turkmenistan | 3147 | 2493 | 5640 | 0.0225496 | 0.0178634 | 0.040413  | 139559     | 366                           | 397                             | 763                             |
| TKM  | 2013 | country | 4_Eur   | Turkmenistan | 3226 | 2560 | 5786 | 0.0226279 | 0.0179564 | 0.0405843 | 142568     | 374                           | 405                             | 779                             |
| TKM  | 2014 | country | 4_Eur   | Turkmenistan | 3285 | 2618 | 5903 | 0.022789  | 0.0181618 | 0.0409508 | 144149     | 384                           | 409                             | 793                             |
| TKM  | 2015 | country | 4_Eur   | Turkmenistan | 3327 | 2655 | 5982 | 0.0230594 | 0.0184018 | 0.0414612 | 144280     | 393                           | 407                             | 800                             |
| TKM  | 2016 | country | 4_Eur   | Turkmenistan | 3350 | 2667 | 6017 | 0.023403  | 0.0186316 | 0.0420346 | 143144     | 382                           | 401                             | 783                             |
| TKM  | 2017 | country | 4_Eur   | Turkmenistan | 3338 | 2673 | 6011 | 0.0236246 | 0.018918  | 0.0425426 | 141294     | 387                           | 394                             | 780                             |
| TKM  | 2018 | country | 4_Eur   | Turkmenistan | 3297 | 2638 | 5935 | 0.0237058 | 0.0189675 | 0.0426733 | 139080     | 383                           | 382                             | 765                             |
| TKM  | 2019 | country | 4_Eur   | Turkmenistan | 3233 | 2560 | 5793 | 0.0236278 | 0.0187093 | 0.0423372 | 136830     | 375                           | 366                             | 740                             |
| TLS  | 2000 | country | 3_Sear  | Timor-Leste  | 1312 | 2451 | 3763 | 0.0368194 | 0.0687839 | 0.1056033 | 35633      | 62                            | 26                              | 88                              |
| TLS  | 2001 | country | 3_Sear  | Timor-Leste  | 1263 | 2342 | 3605 | 0.0351282 | 0.0651388 | 0.100267  | 35954      | 62                            | 27                              | 89                              |
| TLS  | 2002 | country | 3_Sear  | Timor-Leste  | 1213 | 2224 | 3437 | 0.0335601 | 0.0615315 | 0.0950916 | 36144      | 63                            | 26                              | 89                              |
| TLS  | 2003 | country | 3_Sear  | Timor-Leste  | 1159 | 2103 | 3262 | 0.0320333 | 0.0581243 | 0.0901576 | 36181      | 62                            | 26                              | 88                              |
| TLS  | 2004 | country | 3_Sear  | Timor-Leste  | 1101 | 1976 | 3077 | 0.0305629 | 0.0548523 | 0.0854152 | 36024      | 63                            | 24                              | 87                              |
| TLS  | 2005 | country | 3_Sear  | Timor-Leste  | 1044 | 1842 | 2886 | 0.029199  | 0.0515177 | 0.0807167 | 35755      | 61                            | 21                              | 82                              |
| TLS  | 2006 | country | 3_Sear  | Timor-Leste  | 988  | 1709 | 2697 | 0.0279673 | 0.0483766 | 0.0763438 | 35327      | 61                            | 29                              | 90                              |
| TLS  | 2007 | country | 3_Sear  | Timor-Leste  | 935  | 1577 | 2512 | 0.0268738 | 0.0453262 | 0.0722001 | 34792      | 59                            | 30                              | 89                              |
| TLS  | 2008 | country | 3_Sear  | Timor-Leste  | 890  | 1456 | 2346 | 0.0259455 | 0.0424457 | 0.0683912 | 34303      | 60                            | 36                              | 96                              |
| TLS  | 2009 | country | 3_Sear  | Timor-Leste  | 852  | 1350 | 2202 | 0.0251429 | 0.0398391 | 0.064982  | 33886      | 61                            | 34                              | 95                              |
| TLS  | 2010 | country | 3_Sear  | Timor-Leste  | 822  | 1253 | 2075 | 0.0244838 | 0.0373215 | 0.0618053 | 33573      | 58                            | 30                              | 88                              |
| TLS  | 2011 | country | 3_Sear  | Timor-Leste  | 797  | 1178 | 1975 | 0.0238031 | 0.0351819 | 0.058985  | 33483      | 60                            | 29                              | 89                              |
| TLS  | 2012 | country | 3_Sear  | Timor-Leste  | 778  | 1115 | 1893 | 0.0231469 | 0.0331732 | 0.05632   | 33611      | 61                            | 38                              | 99                              |
| TLS  | 2013 | country | 3_Sear  | Timor-Leste  | 766  | 1063 | 1829 | 0.0225407 | 0.0312804 | 0.0538212 | 33983      | 62                            | 36                              | 98                              |
| TLS  | 2014 | country | 3_Sear  | Timor-Leste  | 759  | 1027 | 1786 | 0.0219802 | 0.0297413 | 0.0517215 | 34531      | 63                            | 40                              | 103                             |
| TLS  | 2015 | country | 3_Sear  | Timor-Leste  | 755  | 996  | 1751 | 0.0214334 | 0.028275  | 0.0497084 | 35225      | 64                            | 36                              | 100                             |
| TLS  | 2016 | country | 3_Sear  | Timor-Leste  | 754  | 970  | 1724 | 0.0209685 | 0.0269754 | 0.047944  | 35959      | 66                            | 40                              | 106                             |
| TLS  | 2017 | country | 3_Sear  | Timor-Leste  | 752  | 945  | 1697 | 0.0204903 | 0.0257491 | 0.0462394 | 36700      | 69                            | 42                              | 112                             |
| TLS  | 2018 | country | 3_Sear  | Timor-Leste  | 749  | 920  | 1669 | 0.0200406 | 0.0246159 | 0.0446565 | 37374      | 69                            | 42                              | 111                             |
| TLS  | 2019 | country | 3_Sear  | Timor-Leste  | 742  | 903  | 1645 | 0.019581  | 0.0238297 | 0.0434107 | 37894      | 70                            | 42                              | 111                             |

| iso3 | year | level   | whoreg6 | whoname            | nnd | pnd | u5d | nmr       | pnmr      | u5mr      | Livebirths | Neonatal birth defects deaths | 1-59 month birth defects deaths | Under five birth defects deaths |
|------|------|---------|---------|--------------------|-----|-----|-----|-----------|-----------|-----------|------------|-------------------------------|---------------------------------|---------------------------------|
| TON  | 2000 | country | 6_Wpr   | Tonga              | 22  | 28  | 50  | 0.0078036 | 0.0099318 | 0.0177354 | 2819       | 4                             | 6                               | 10                              |
| TON  | 2001 | country | 6_Wpr   | Tonga              | 22  | 27  | 49  | 0.0079881 | 0.0098036 | 0.0177917 | 2754       | 4                             | 6                               | 10                              |
| TON  | 2002 | country | 6_Wpr   | Tonga              | 21  | 28  | 49  | 0.0074995 | 0.0099994 | 0.0174989 | 2800       | 4                             | 7                               | 10                              |
| TON  | 2003 | country | 6_Wpr   | Tonga              | 21  | 28  | 49  | 0.0073808 | 0.0098411 | 0.0172219 | 2845       | 4                             | 7                               | 10                              |
| TON  | 2004 | country | 6_Wpr   | Tonga              | 21  | 28  | 49  | 0.0072962 | 0.0097282 | 0.0170244 | 2878       | 4                             | 7                               | 10                              |
| TON  | 2005 | country | 6_Wpr   | Tonga              | 21  | 28  | 49  | 0.0072481 | 0.0096642 | 0.0169123 | 2897       | 4                             | 7                               | 11                              |
| TON  | 2006 | country | 6_Wpr   | Tonga              | 21  | 28  | 49  | 0.0072382 | 0.009651  | 0.0168892 | 2901       | 4                             | 7                               | 11                              |
| TON  | 2007 | country | 6_Wpr   | Tonga              | 21  | 28  | 49  | 0.0072616 | 0.0096822 | 0.0169438 | 2892       | 4                             | 7                               | 11                              |
| TON  | 2008 | country | 6_Wpr   | Tonga              | 21  | 27  | 48  | 0.0073096 | 0.0093981 | 0.0167076 | 2873       | 4                             | 6                               | 10                              |
| TON  | 2009 | country | 6_Wpr   | Tonga              | 21  | 27  | 48  | 0.0073803 | 0.009489  | 0.0168693 | 2845       | 4                             | 6                               | 10                              |
| TON  | 2010 | country | 6_Wpr   | Tonga              | 20  | 28  | 48  | 0.0071213 | 0.0099699 | 0.0170912 | 2808       | 4                             | 7                               | 10                              |
| TON  | 2011 | country | 6_Wpr   | Tonga              | 20  | 27  | 47  | 0.0071927 | 0.0097102 | 0.0169029 | 2781       | 4                             | 6                               | 10                              |
| TON  | 2012 | country | 6_Wpr   | Tonga              | 20  | 26  | 46  | 0.007204  | 0.0093653 | 0.0165693 | 2776       | 4                             | 6                               | 10                              |
| TON  | 2013 | country | 6_Wpr   | Tonga              | 20  | 26  | 46  | 0.0075061 | 0.009758  | 0.0172641 | 2664       | 4                             | 6                               | 10                              |
| TON  | 2014 | country | 6_Wpr   | Tonga              | 20  | 25  | 45  | 0.0074273 | 0.0092841 | 0.0167114 | 2693       | 4                             | 6                               | 10                              |
| TON  | 2015 | country | 6_Wpr   | Tonga              | 19  | 25  | 44  | 0.0072731 | 0.0095699 | 0.016843  | 2612       | 4                             | 6                               | 10                              |
| TON  | 2016 | country | 6_Wpr   | Tonga              | 19  | 25  | 44  | 0.0075067 | 0.0098772 | 0.0173839 | 2531       | 4                             | 6                               | 10                              |
| TON  | 2017 | country | 6_Wpr   | Tonga              | 19  | 24  | 43  | 0.0073145 | 0.0092393 | 0.0165538 | 2598       | 4                             | 6                               | 10                              |
| TON  | 2018 | country | 6_Wpr   | Tonga              | 19  | 24  | 43  | 0.0075355 | 0.0095186 | 0.0170541 | 2521       | 4                             | 6                               | 10                              |
| TON  | 2019 | country | 6_Wpr   | Tonga              | 19  | 23  | 42  | 0.0077797 | 0.0094176 | 0.0171973 | 2442       | 4                             | 6                               | 9                               |
| TTO  | 2000 | country | 2_Amr   | Trinidad and Tobag | 352 | 175 | 527 | 0.0188286 | 0.0093608 | 0.0281895 | 18695      | 35                            | 30                              | 65                              |
| TTO  | 2001 | country | 2_Amr   | Trinidad and Tobag | 352 | 173 | 525 | 0.0187301 | 0.0092054 | 0.0279355 | 18793      | 73                            | 37                              | 110                             |
| TTO  | 2002 | country | 2_Amr   | Trinidad and Tobag | 351 | 171 | 522 | 0.0185393 | 0.009032  | 0.0275713 | 18933      | 98                            | 18                              | 116                             |
| TTO  | 2003 | country | 2_Amr   | Trinidad and Tobag | 350 | 169 | 519 | 0.018252  | 0.0088131 | 0.0270651 | 19176      | 73                            | 28                              | 101                             |
| TTO  | 2004 | country | 2_Amr   | Trinidad and Tobag | 348 | 167 | 515 | 0.0179094 | 0.0085944 | 0.0265038 | 19431      | 70                            | 37                              | 107                             |
| TTO  | 2005 | country | 2_Amr   | Trinidad and Tobag | 345 | 165 | 510 | 0.0175654 | 0.0084008 | 0.0259662 | 19641      | 77                            | 48                              | 125                             |
| TTO  | 2006 | country | 2_Amr   | Trinidad and Tobag | 340 | 163 | 503 | 0.0171131 | 0.0082042 | 0.0253173 | 19868      | 100                           | 39                              | 138                             |
| TTO  | 2007 | country | 2_Amr   | Trinidad and Tobag | 333 | 162 | 495 | 0.0166437 | 0.0080969 | 0.0247406 | 20008      | 74                            | 45                              | 120                             |
| TTO  | 2008 | country | 2_Amr   | Trinidad and Tobag | 327 | 158 | 485 | 0.0162072 | 0.007831  | 0.0240382 | 20176      | 78                            | 43                              | 122                             |
| TTO  | 2009 | country | 2_Amr   | Trinidad and Tobag | 319 | 156 | 475 | 0.0157946 | 0.007724  | 0.0235186 | 20197      | 45                            | 44                              | 88                              |
| TTO  | 2010 | country | 2_Amr   | Trinidad and Tobag | 310 | 152 | 462 | 0.015323  | 0.0075132 | 0.0228363 | 20231      | 53                            | 37                              | 90                              |
| TTO  | 2011 | country | 2_Amr   | Trinidad and Tobag | 298 | 149 | 447 | 0.0148093 | 0.0074046 | 0.0222139 | 20123      | 61                            | 50                              | 112                             |
| TTO  | 2012 | country | 2_Amr   | Trinidad and Tobag | 287 | 144 | 431 | 0.0143341 | 0.007192  | 0.0215262 | 20022      | 65                            | 50                              | 116                             |
| TTO  | 2013 | country | 2_Amr   | Trinidad and Tobag | 275 | 139 | 414 | 0.0138988 | 0.0070252 | 0.0209241 | 19786      | 55                            | 43                              | 98                              |
| TTO  | 2014 | country | 2_Amr   | Trinidad and Tobag | 263 | 135 | 398 | 0.0135043 | 0.0069319 | 0.0204361 | 19475      | 56                            | 42                              | 97                              |
| TTO  | 2015 | country | 2_Amr   | Trinidad and Tobag | 251 | 130 | 381 | 0.0130755 | 0.0067722 | 0.0198476 | 19196      | 54                            | 40                              | 94                              |
| TTO  | 2016 | country | 2_Amr   | Trinidad and Tobag | 238 | 125 | 363 | 0.012638  | 0.0066376 | 0.0192756 | 18832      | 50                            | 39                              | 88                              |
| TTO  | 2017 | country | 2_Amr   | Trinidad and Tobag | 226 | 120 | 346 | 0.0122697 | 0.0065149 | 0.0187846 | 18419      | 48                            | 37                              | 85                              |
| TTO  | 2018 | country | 2_Amr   | Trinidad and Tobag | 214 | 115 | 329 | 0.0118945 | 0.0063919 | 0.0182864 | 17991      | 45                            | 36                              | 81                              |
| TTO  | 2019 | country | 2_Amr   | Trinidad and Tobag | 202 | 110 | 312 | 0.0115339 | 0.0062808 | 0.0178148 | 17514      | 43                            | 34                              | 77                              |

| iso3 | year | level   | whoreg6 | whoname | nnd   | pnd   | u5d   | nmr       | pnmr      | u5mr      | Livebirths | Neonatal birth defects deaths | 1-59 month birth defects deaths | Under five birth defects deaths |
|------|------|---------|---------|---------|-------|-------|-------|-----------|-----------|-----------|------------|-------------------------------|---------------------------------|---------------------------------|
| TUN  | 2000 | country | 5_Emr   | Tunisia | 3155  | 1913  | 5068  | 0.0188132 | 0.0114072 | 0.0302204 | 167701     | 374                           | 369                             | 742                             |
| TUN  | 2001 | country | 5_Emr   | Tunisia | 2940  | 1714  | 4654  | 0.0177362 | 0.0103401 | 0.0280763 | 165763     | 385                           | 340                             | 725                             |
| TUN  | 2002 | country | 5_Emr   | Tunisia | 2753  | 1563  | 4316  | 0.0167165 | 0.0094907 | 0.0262072 | 164687     | 394                           | 327                             | 721                             |
| TUN  | 2003 | country | 5_Emr   | Tunisia | 2604  | 1433  | 4037  | 0.0158326 | 0.0087128 | 0.0245454 | 164471     | 405                           | 319                             | 724                             |
| TUN  | 2004 | country | 5_Emr   | Tunisia | 2489  | 1327  | 3816  | 0.0150646 | 0.0080316 | 0.0230962 | 165222     | 424                           | 300                             | 725                             |
| TUN  | 2005 | country | 5_Emr   | Tunisia | 2407  | 1239  | 3646  | 0.0144006 | 0.0074127 | 0.0218132 | 167146     | 436                           | 283                             | 719                             |
| TUN  | 2006 | country | 5_Emr   | Tunisia | 2358  | 1169  | 3527  | 0.0138326 | 0.0068576 | 0.0206903 | 170467     | 458                           | 270                             | 729                             |
| TUN  | 2007 | country | 5_Emr   | Tunisia | 2337  | 1118  | 3455  | 0.0133357 | 0.0063899 | 0.0197469 | 174965     | 475                           | 260                             | 735                             |
| TUN  | 2008 | country | 5_Emr   | Tunisia | 2344  | 1080  | 3424  | 0.0129829 | 0.0059819 | 0.0189648 | 180545     | 495                           | 252                             | 747                             |
| TUN  | 2009 | country | 5_Emr   | Tunisia | 2368  | 1059  | 3427  | 0.0126842 | 0.0056725 | 0.0183567 | 186689     | 517                           | 247                             | 764                             |
| TUN  | 2010 | country | 5_Emr   | Tunisia | 2405  | 1048  | 3453  | 0.0124642 | 0.0054314 | 0.0178956 | 192952     | 530                           | 243                             | 774                             |
| TUN  | 2011 | country | 5_Emr   | Tunisia | 2445  | 1043  | 3488  | 0.0122998 | 0.0052469 | 0.0175467 | 198784     | 550                           | 241                             | 790                             |
| TUN  | 2012 | country | 5_Emr   | Tunisia | 2483  | 1044  | 3527  | 0.0121935 | 0.0051269 | 0.0173204 | 203633     | 570                           | 243                             | 813                             |
| TUN  | 2013 | country | 5_Emr   | Tunisia | 2511  | 1045  | 3556  | 0.0121273 | 0.005047  | 0.0171744 | 207053     | 583                           | 241                             | 824                             |
| TUN  | 2014 | country | 5_Emr   | Tunisia | 2525  | 1047  | 3572  | 0.0120797 | 0.0050089 | 0.0170886 | 209028     | 587                           | 239                             | 826                             |
| TUN  | 2015 | country | 5_Emr   | Tunisia | 2525  | 1046  | 3571  | 0.0120575 | 0.0049949 | 0.0170524 | 209414     | 591                           | 236                             | 826                             |
| TUN  | 2016 | country | 5_Emr   | Tunisia | 2511  | 1047  | 3558  | 0.0120595 | 0.0050284 | 0.0170879 | 208217     | 590                           | 232                             | 823                             |
| TUN  | 2017 | country | 5_Emr   | Tunisia | 2485  | 1044  | 3529  | 0.0120669 | 0.0050695 | 0.0171364 | 205936     | 588                           | 228                             | 816                             |
| TUN  | 2018 | country | 5_Emr   | Tunisia | 2442  | 1034  | 3476  | 0.0120314 | 0.0050944 | 0.0171258 | 202969     | 579                           | 222                             | 801                             |
| TUN  | 2019 | country | 5_Emr   | Tunisia | 2381  | 1017  | 3398  | 0.0119269 | 0.0050943 | 0.0170212 | 199633     | 568                           | 215                             | 783                             |
| TUR  | 2000 | country | 4_Eur   | Turkey  | 25558 | 27248 | 52806 | 0.0186527 | 0.0198861 | 0.0385388 | 1370203    | 7153                          | 6758                            | 13911                           |
| TUR  | 2001 | country | 4_Eur   | Turkey  | 23927 | 24881 | 48808 | 0.0175764 | 0.0182772 | 0.0358535 | 1361317    | 6694                          | 6426                            | 13120                           |
| TUR  | 2002 | country | 4_Eur   | Turkey  | 22439 | 22566 | 45005 | 0.0166042 | 0.0166982 | 0.0333024 | 1351403    | 6295                          | 6060                            | 12355                           |
| TUR  | 2003 | country | 4_Eur   | Turkey  | 21061 | 20377 | 41438 | 0.0156986 | 0.0151888 | 0.0308874 | 1341582    | 5883                          | 5682                            | 11565                           |
| TUR  | 2004 | country | 4_Eur   | Turkey  | 19631 | 18521 | 38152 | 0.014734  | 0.0139009 | 0.0286349 | 1332361    | 5486                          | 5353                            | 10839                           |
| TUR  | 2005 | country | 4_Eur   | Turkey  | 17991 | 17139 | 35130 | 0.013586  | 0.0129426 | 0.0265286 | 1324233    | 5088                          | 5126                            | 10213                           |
| TUR  | 2006 | country | 4_Eur   | Turkey  | 16503 | 15846 | 32349 | 0.0125269 | 0.0120282 | 0.0245551 | 1317407    | 4550                          | 4893                            | 9444                            |
| TUR  | 2007 | country | 4_Eur   | Turkey  | 15136 | 14710 | 29846 | 0.0115383 | 0.0112135 | 0.0227518 | 1311810    | 4236                          | 4680                            | 8916                            |
| TUR  | 2008 | country | 4_Eur   | Turkey  | 13894 | 13673 | 27567 | 0.0106267 | 0.0104577 | 0.0210844 | 1307457    | 4068                          | 4471                            | 8539                            |
| TUR  | 2009 | country | 4_Eur   | Turkey  | 12785 | 12743 | 25528 | 0.0098029 | 0.0097707 | 0.0195736 | 1304204    | 3255                          | 3921                            | 7175                            |
| TUR  | 2010 | country | 4_Eur   | Turkey  | 11800 | 11876 | 23676 | 0.0090593 | 0.0091177 | 0.0181777 | 1302524    | 3447                          | 4325                            | 7772                            |
| TUR  | 2011 | country | 4_Eur   | Turkey  | 10913 | 11125 | 22038 | 0.0083784 | 0.0085412 | 0.0169195 | 1302517    | 3619                          | 4231                            | 7850                            |
| TUR  | 2012 | country | 4_Eur   | Turkey  | 10125 | 10436 | 20561 | 0.0077639 | 0.0080023 | 0.0157662 | 1304119    | 2917                          | 3587                            | 6504                            |
| TUR  | 2013 | country | 4_Eur   | Turkey  | 9421  | 9817  | 19238 | 0.0072097 | 0.0075128 | 0.0147225 | 1306707    | 2782                          | 3420                            | 6202                            |
| TUR  | 2014 | country | 4_Eur   | Turkey  | 8821  | 9223  | 18044 | 0.0067334 | 0.0070403 | 0.0137737 | 1310033    | 2528                          | 3280                            | 5808                            |
| TUR  | 2015 | country | 4_Eur   | Turkey  | 8322  | 8621  | 16943 | 0.0063382 | 0.0065659 | 0.012904  | 1313001    | 2306                          | 3261                            | 5568                            |
| TUR  | 2016 | country | 4_Eur   | Turkey  | 7919  | 8004  | 15923 | 0.0060227 | 0.0060873 | 0.01211   | 1314868    | 2125                          | 2981                            | 5106                            |
| TUR  | 2017 | country | 4_Eur   | Turkey  | 7579  | 7374  | 14953 | 0.0057632 | 0.0056073 | 0.0113706 | 1315062    | 2102                          | 2719                            | 4822                            |
| TUR  | 2018 | country | 4_Eur   | Turkey  | 7246  | 6784  | 14030 | 0.0055196 | 0.0051677 | 0.0106873 | 1312774    | 1987                          | 2502                            | 4489                            |
| TUR  | 2019 | country | 4_Eur   | Turkey  | 6905  | 6244  | 13149 | 0.0052781 | 0.0047729 | 0.010051  | 1308227    | 1887                          | 2303                            | 4190                            |

| iso3 | year | level   | whoreg6 | whoname            | nnd   | pnd    | u5d    | nmr       | pnmr      | u5mr      | Livebirths | Neonatal birth defects deaths | 1-59 month birth defects deaths | Under five birth defects deaths |
|------|------|---------|---------|--------------------|-------|--------|--------|-----------|-----------|-----------|------------|-------------------------------|---------------------------------|---------------------------------|
| TUV  | 2000 | country | 6_Wpr   | Tuvalu             | 6     | 4      | 10     | 0.0241724 | 0.0161149 | 0.0402874 | 248        | 1                             | 0                               | 1                               |
| TUV  | 2001 | country | 6_Wpr   | Tuvalu             | 6     | 4      | 10     | 0.0239672 | 0.0159782 | 0.0399454 | 250        | 1                             | 1                               | 1                               |
| TUV  | 2002 | country | 6_Wpr   | Tuvalu             | 6     | 4      | 10     | 0.0238201 | 0.0158801 | 0.0397002 | 252        | 1                             | 1                               | 1                               |
| TUV  | 2003 | country | 6_Wpr   | Tuvalu             | 6     | 4      | 10     | 0.0236822 | 0.0157882 | 0.0394704 | 253        | 1                             | 1                               | 1                               |
| TUV  | 2004 | country | 6_Wpr   | Tuvalu             | 6     | 4      | 10     | 0.0235435 | 0.0156957 | 0.0392392 | 255        | 1                             | 1                               | 1                               |
| TUV  | 2005 | country | 6_Wpr   | Tuvalu             | 6     | 4      | 10     | 0.0232927 | 0.0155285 | 0.0388211 | 258        | 1                             | 0                               | 1                               |
| TUV  | 2006 | country | 6_Wpr   | Tuvalu             | 6     | 3      | 9      | 0.0229555 | 0.0114777 | 0.0344332 | 261        | 1                             | 0                               | 1                               |
| TUV  | 2007 | country | 6_Wpr   | Tuvalu             | 6     | 3      | 9      | 0.0225607 | 0.0112803 | 0.033841  | 266        | 1                             | 0                               | 1                               |
| TUV  | 2008 | country | 6_Wpr   | Tuvalu             | 6     | 3      | 9      | 0.0221196 | 0.0110598 | 0.0331794 | 271        | 1                             | 0                               | 1                               |
| TUV  | 2009 | country | 6_Wpr   | Tuvalu             | 6     | 3      | 9      | 0.0216074 | 0.0108037 | 0.0324112 | 278        | 1                             | 0                               | 1                               |
| TUV  | 2010 | country | 6_Wpr   | Tuvalu             | 6     | 3      | 9      | 0.0211109 | 0.0105545 | 0.0316635 | 284        | 1                             | 0                               | 1                               |
| TUV  | 2011 | country | 6_Wpr   | Tuvalu             | 6     | 3      | 9      | 0.0205666 | 0.0102833 | 0.0308498 | 292        | 1                             | 0                               | 1                               |
| TUV  | 2012 | country | 6_Wpr   | Tuvalu             | 6     | 2      | 8      | 0.0200412 | 0.0066804 | 0.0267215 | 299        | 1                             | 0                               | 1                               |
| TUV  | 2013 | country | 6_Wpr   | Tuvalu             | 6     | 2      | 8      | 0.0195154 | 0.0065051 | 0.0260205 | 307        | 1                             | 0                               | 1                               |
| TUV  | 2014 | country | 6_Wpr   | Tuvalu             | 5     | 3      | 8      | 0.0189205 | 0.0113523 | 0.0302728 | 264        | 1                             | 1                               | 1                               |
| TUV  | 2015 | country | 6_Wpr   | Tuvalu             | 5     | 3      | 8      | 0.0183267 | 0.010996  | 0.0293227 | 273        | 1                             | 1                               | 1                               |
| TUV  | 2016 | country | 6_Wpr   | Tuvalu             | 5     | 3      | 8      | 0.0176792 | 0.0106075 | 0.0282867 | 283        | 1                             | 1                               | 1                               |
| TUV  | 2017 | country | 6_Wpr   | Tuvalu             | 5     | 2      | 7      | 0.0171058 | 0.0068423 | 0.0239481 | 292        | 1                             | 0                               | 1                               |
| TUV  | 2018 | country | 6_Wpr   | Tuvalu             | 5     | 2      | 7      | 0.0165831 | 0.0066332 | 0.0232163 | 302        | 1                             | 0                               | 1                               |
| TUV  | 2019 | country | 6_Wpr   | Tuvalu             | 5     | 2      | 7      | 0.0160294 | 0.0064118 | 0.0224412 | 312        | 1                             | 0                               | 1                               |
| TZA  | 2000 | country | 1_Afr   | United Republic of | 47036 | 125162 | 172198 | 0.0335516 | 0.0892801 | 0.1228317 | 1401902    | 2535                          | 773                             | 3307                            |
| TZA  | 2001 | country | 1_Afr   | United Republic of | 46661 | 119441 | 166102 | 0.0323996 | 0.0829352 | 0.1153348 | 1440173    | 2572                          | 1044                            | 3616                            |
| TZA  | 2002 | country | 1_Afr   | United Republic of | 46254 | 113391 | 159645 | 0.0312419 | 0.0765889 | 0.1078308 | 1480514    | 2610                          | 1974                            | 4584                            |
| TZA  | 2003 | country | 1_Afr   | United Republic of | 45883 | 107733 | 153616 | 0.0301427 | 0.0707748 | 0.1009174 | 1522195    | 2648                          | 1881                            | 4529                            |
| TZA  | 2004 | country | 1_Afr   | United Republic of | 45482 | 102829 | 148311 | 0.0290703 | 0.0657243 | 0.0947946 | 1564551    | 2681                          | 2017                            | 4698                            |
| TZA  | 2005 | country | 1_Afr   | United Republic of | 45231 | 98354  | 143585 | 0.0281533 | 0.0612188 | 0.0893721 | 1606598    | 2719                          | 2115                            | 4835                            |
| TZA  | 2006 | country | 1_Afr   | United Republic of | 45015 | 94519  | 139534 | 0.0273289 | 0.0573832 | 0.0847121 | 1647155    | 2757                          | 2473                            | 5230                            |
| TZA  | 2007 | country | 1_Afr   | United Republic of | 44828 | 90578  | 135406 | 0.0265932 | 0.0537333 | 0.0803265 | 1685695    | 2796                          | 2531                            | 5327                            |
| TZA  | 2008 | country | 1_Afr   | United Republic of | 44651 | 87282  | 131933 | 0.025931  | 0.050689  | 0.07662   | 1721914    | 2833                          | 2636                            | 5469                            |
| TZA  | 2009 | country | 1_Afr   | United Republic of | 44457 | 83433  | 127890 | 0.0253195 | 0.0475174 | 0.0728369 | 1755841    | 2871                          | 3128                            | 5999                            |
| TZA  | 2010 | country | 1_Afr   | United Republic of | 44220 | 80244  | 124464 | 0.0247317 | 0.0448795 | 0.0696111 | 1787990    | 2904                          | 3466                            | 6370                            |
| TZA  | 2011 | country | 1_Afr   | United Republic of | 44014 | 76636  | 120650 | 0.0241949 | 0.0421275 | 0.0663225 | 1819142    | 2941                          | 3794                            | 6735                            |
| TZA  | 2012 | country | 1_Afr   | United Republic of | 43789 | 73656  | 117445 | 0.0236636 | 0.0398038 | 0.0634674 | 1850477    | 2976                          | 4413                            | 7389                            |
| TZA  | 2013 | country | 1_Afr   | United Republic of | 43540 | 71078  | 114618 | 0.023124  | 0.0377494 | 0.0608735 | 1882889    | 3009                          | 5252                            | 8261                            |
| TZA  | 2014 | country | 1_Afr   | United Republic of | 43323 | 68400  | 111723 | 0.0226006 | 0.0356828 | 0.0582834 | 1916892    | 3041                          | 5380                            | 8421                            |
| TZA  | 2015 | country | 1_Afr   | United Republic of | 43162 | 66911  | 110073 | 0.0221036 | 0.0342657 | 0.0563693 | 1952711    | 3075                          | 5441                            | 8516                            |
| TZA  | 2016 | country | 1_Afr   | United Republic of | 43032 | 64968  | 108000 | 0.0216206 | 0.0326419 | 0.0542624 | 1990327    | 3108                          | 4491                            | 7598                            |
| TZA  | 2017 | country | 1_Afr   | United Republic of | 42920 | 63181  | 106101 | 0.0211506 | 0.031135  | 0.0522856 | 2029260    | 3140                          | 5448                            | 8588                            |
| TZA  | 2018 | country | 1_Afr   | United Republic of | 42820 | 61488  | 104308 | 0.0206948 | 0.0297169 | 0.0504117 | 2069122    | 3164                          | 5419                            | 8583                            |
| TZA  | 2019 | country | 1_Afr   | United Republic of | 42814 | 60408  | 103222 | 0.0202927 | 0.0286318 | 0.0489246 | 2109819    | 3189                          | 5360                            | 8548                            |

| iso3 | year | level   | whoreg6 | whoname | nnd   | pnd    | u5d    | nmr       | pnmr      | u5mr      | Livebirths | Neonatal birth defects deaths | 1-59 month birth defects deaths | Under five birth defects deaths |
|------|------|---------|---------|---------|-------|--------|--------|-----------|-----------|-----------|------------|-------------------------------|---------------------------------|---------------------------------|
| UGA  | 2000 | country | 1_Afr   | Uganda  | 36959 | 131324 | 168283 | 0.0320544 | 0.113897  | 0.1459514 | 1153009    | 1759                          | 259                             | 2018                            |
| UGA  | 2001 | country | 1_Afr   | Uganda  | 36823 | 125416 | 162239 | 0.031141  | 0.1060638 | 0.1372048 | 1182460    | 1877                          | 245                             | 2123                            |
| UGA  | 2002 | country | 1_Afr   | Uganda  | 36691 | 125236 | 161927 | 0.0302577 | 0.1032777 | 0.1335354 | 1212617    | 1926                          | 292                             | 2218                            |
| UGA  | 2003 | country | 1_Afr   | Uganda  | 36510 | 117058 | 153568 | 0.0293623 | 0.0941409 | 0.1235032 | 1243432    | 1900                          | 566                             | 2466                            |
| UGA  | 2004 | country | 1_Afr   | Uganda  | 36430 | 102309 | 138739 | 0.0285798 | 0.0802624 | 0.1088422 | 1274677    | 2035                          | 541                             | 2576                            |
| UGA  | 2005 | country | 1_Afr   | Uganda  | 36474 | 96315  | 132789 | 0.0279262 | 0.0737428 | 0.101669  | 1306087    | 2049                          | 1150                            | 3199                            |
| UGA  | 2006 | country | 1_Afr   | Uganda  | 36594 | 90716  | 127310 | 0.0273626 | 0.0678313 | 0.0951939 | 1337372    | 2119                          | 1563                            | 3683                            |
| UGA  | 2007 | country | 1_Afr   | Uganda  | 36684 | 85545  | 122229 | 0.0268142 | 0.0625291 | 0.0893432 | 1368082    | 2197                          | 1626                            | 3823                            |
| UGA  | 2008 | country | 1_Afr   | Uganda  | 36722 | 80514  | 117236 | 0.0262701 | 0.0575976 | 0.0838676 | 1397864    | 2219                          | 886                             | 3105                            |
| UGA  | 2009 | country | 1_Afr   | Uganda  | 36718 | 76091  | 112809 | 0.0257413 | 0.0533442 | 0.0790855 | 1426424    | 2314                          | 965                             | 3279                            |
| UGA  | 2010 | country | 1_Afr   | Uganda  | 36708 | 71000  | 107708 | 0.0252559 | 0.0488498 | 0.0741057 | 1453441    | 2356                          | 947                             | 3303                            |
| UGA  | 2011 | country | 1_Afr   | Uganda  | 36639 | 67136  | 103776 | 0.0247786 | 0.0454037 | 0.0701823 | 1478656    | 2400                          | 1133                            | 3534                            |
| UGA  | 2012 | country | 1_Afr   | Uganda  | 36414 | 62178  | 98592  | 0.0242406 | 0.0413918 | 0.0656324 | 1502188    | 2407                          | 1535                            | 3942                            |
| UGA  | 2013 | country | 1_Afr   | Uganda  | 36044 | 57729  | 93773  | 0.0236462 | 0.0378725 | 0.0615188 | 1524303    | 2456                          | 1979                            | 4434                            |
| UGA  | 2014 | country | 1_Afr   | Uganda  | 35550 | 54034  | 89584  | 0.0230061 | 0.0349681 | 0.0579743 | 1545241    | 2434                          | 2319                            | 4753                            |
| UGA  | 2015 | country | 1_Afr   | Uganda  | 34920 | 51007  | 85927  | 0.0223065 | 0.0325827 | 0.0548892 | 1565463    | 2476                          | 1959                            | 4435                            |
| UGA  | 2016 | country | 1_Afr   | Uganda  | 34338 | 47537  | 81875  | 0.0216578 | 0.0299828 | 0.0516406 | 1585480    | 2529                          | 1667                            | 4196                            |
| UGA  | 2017 | country | 1_Afr   | Uganda  | 33824 | 45246  | 79070  | 0.0210645 | 0.028178  | 0.0492425 | 1605733    | 2520                          | 1452                            | 3972                            |
| UGA  | 2018 | country | 1_Afr   | Uganda  | 33349 | 43261  | 76610  | 0.0205047 | 0.0265992 | 0.0471039 | 1626409    | 2532                          | 2090                            | 4622                            |
| UGA  | 2019 | country | 1_Afr   | Uganda  | 32914 | 41367  | 74281  | 0.0199779 | 0.0251089 | 0.0450868 | 1647522    | 2515                          | 2050                            | 4566                            |
| UKR  | 2000 | country | 4_Eur   | Ukraine | 4507  | 3065   | 7572   | 0.0111618 | 0.0075907 | 0.0187525 | 403786     | 1018                          | 709                             | 1727                            |
| UKR  | 2001 | country | 4_Eur   | Ukraine | 4253  | 2839   | 7092   | 0.0106202 | 0.0070893 | 0.0177095 | 400464     | 981                           | 673                             | 1654                            |
| UKR  | 2002 | country | 4_Eur   | Ukraine | 4068  | 2656   | 6724   | 0.0100899 | 0.0065877 | 0.0166776 | 403174     | 990                           | 646                             | 1636                            |
| UKR  | 2003 | country | 4_Eur   | Ukraine | 3940  | 2521   | 6461   | 0.0095875 | 0.0061345 | 0.015722  | 410952     | 973                           | 627                             | 1600                            |
| UKR  | 2004 | country | 4_Eur   | Ukraine | 3858  | 2433   | 6291   | 0.0091242 | 0.005754  | 0.0148782 | 422833     | 971                           | 616                             | 1587                            |
| UKR  | 2005 | country | 4_Eur   | Ukraine | 3815  | 2377   | 6192   | 0.0087206 | 0.0054335 | 0.0141541 | 437470     | 956                           | 612                             | 1568                            |
| UKR  | 2006 | country | 4_Eur   | Ukraine | 3791  | 2354   | 6145   | 0.008367  | 0.0051954 | 0.0135624 | 453091     | 973                           | 616                             | 1589                            |
| UKR  | 2007 | country | 4_Eur   | Ukraine | 3767  | 2343   | 6110   | 0.0080458 | 0.0050043 | 0.0130501 | 468196     | 969                           | 627                             | 1596                            |
| UKR  | 2008 | country | 4_Eur   | Ukraine | 3711  | 2330   | 6041   | 0.0077148 | 0.0048438 | 0.0125586 | 481026     | 967                           | 643                             | 1611                            |
| UKR  | 2009 | country | 4_Eur   | Ukraine | 3613  | 2299   | 5912   | 0.0073628 | 0.004685  | 0.0120478 | 490712     | 938                           | 649                             | 1587                            |
| UKR  | 2010 | country | 4_Eur   | Ukraine | 3477  | 2252   | 5729   | 0.0070099 | 0.0045402 | 0.0115502 | 496011     | 912                           | 643                             | 1555                            |
| UKR  | 2011 | country | 4_Eur   | Ukraine | 3314  | 2188   | 5502   | 0.0066756 | 0.0044074 | 0.0110831 | 496433     | 879                           | 634                             | 1513                            |
| UKR  | 2012 | country | 4_Eur   | Ukraine | 3144  | 2109   | 5253   | 0.006381  | 0.0042804 | 0.0106613 | 492716     | 844                           | 626                             | 1470                            |
| UKR  | 2013 | country | 4_Eur   | Ukraine | 2967  | 2028   | 4995   | 0.0061097 | 0.0041761 | 0.0102858 | 485620     | 779                           | 611                             | 1390                            |
| UKR  | 2014 | country | 4_Eur   | Ukraine | 2794  | 1939   | 4733   | 0.0058727 | 0.0040756 | 0.0099483 | 475760     | 733                           | 589                             | 1322                            |
| UKR  | 2015 | country | 4_Eur   | Ukraine | 2628  | 1846   | 4474   | 0.0056663 | 0.0039802 | 0.0096465 | 463795     | 689                           | 566                             | 1255                            |
| UKR  | 2016 | country | 4_Eur   | Ukraine | 2468  | 1750   | 4218   | 0.0054823 | 0.0038874 | 0.0093697 | 450175     | 650                           | 546                             | 1196                            |
| UKR  | 2017 | country | 4_Eur   | Ukraine | 2317  | 1654   | 3971   | 0.0053137 | 0.0037932 | 0.0091069 | 436043     | 618                           | 521                             | 1139                            |
| UKR  | 2018 | country | 4_Eur   | Ukraine | 2177  | 1559   | 3736   | 0.0051623 | 0.0036968 | 0.0088591 | 421711     | 589                           | 493                             | 1082                            |
| UKR  | 2019 | country | 4_Eur   | Ukraine | 2047  | 1467   | 3514   | 0.005013  | 0.0035926 | 0.0086055 | 408342     | 546                           | 467                             | 1013                            |

| iso3 | year | level   | whoreg6 | whoname             | nnd   | pnd   | u5d   | nmr       | pnmr      | u5mr      | Livebirths | Neonatal birth defects deaths | 1-59 month birth defects deaths | Under five birth defects deaths |
|------|------|---------|---------|---------------------|-------|-------|-------|-----------|-----------|-----------|------------|-------------------------------|---------------------------------|---------------------------------|
| URY  | 2000 | country | 2_Amr   | Uruguay             | 455   | 466   | 921   | 0.0084294 | 0.0086331 | 0.0170625 | 53978      | 112                           | 127                             | 239                             |
| URY  | 2001 | country | 2_Amr   | Uruguay             | 446   | 441   | 887   | 0.00836   | 0.0082663 | 0.0166263 | 53349      | 117                           | 118                             | 235                             |
| URY  | 2002 | country | 2_Amr   | Uruguay             | 435   | 422   | 857   | 0.0082682 | 0.0080211 | 0.0162894 | 52611      | 112                           | 136                             | 247                             |
| URY  | 2003 | country | 2_Amr   | Uruguay             | 418   | 404   | 822   | 0.0080594 | 0.0077895 | 0.0158489 | 51865      | 114                           | 112                             | 226                             |
| URY  | 2004 | country | 2_Amr   | Uruguay             | 394   | 384   | 778   | 0.0077248 | 0.0075287 | 0.0152535 | 51005      | 112                           | 115                             | 227                             |
| URY  | 2005 | country | 2_Amr   | Uruguay             | 363   | 365   | 728   | 0.0072155 | 0.0072553 | 0.0144708 | 50308      | 107                           | 100                             | 207                             |
| URY  | 2006 | country | 2_Amr   | Uruguay             | 330   | 345   | 675   | 0.0066605 | 0.0069632 | 0.0136237 | 49546      | 95                            | 104                             | 199                             |
| URY  | 2007 | country | 2_Amr   | Uruguay             | 296   | 329   | 625   | 0.0060373 | 0.0067103 | 0.0127476 | 49029      | 73                            | 81                              | 154                             |
| URY  | 2008 | country | 2_Amr   | Uruguay             | 267   | 313   | 580   | 0.0055078 | 0.0064568 | 0.0119646 | 48476      | 88                            | 83                              | 172                             |
| URY  | 2009 | country | 2_Amr   | Uruguay             | 245   | 299   | 544   | 0.0050728 | 0.0061909 | 0.0112637 | 48297      | 73                            | 81                              | 154                             |
| URY  | 2010 | country | 2_Amr   | Uruguay             | 232   | 284   | 516   | 0.0048263 | 0.0059081 | 0.0107345 | 48069      | 68                            | 101                             | 169                             |
| URY  | 2011 | country | 2_Amr   | Uruguay             | 231   | 264   | 495   | 0.0048047 | 0.0054911 | 0.0102958 | 48078      | 72                            | 91                              | 163                             |
| URY  | 2012 | country | 2_Amr   | Uruguay             | 238   | 241   | 479   | 0.004936  | 0.0049983 | 0.0099343 | 48217      | 78                            | 92                              | 169                             |
| URY  | 2013 | country | 2_Amr   | Uruguay             | 245   | 218   | 463   | 0.0050838 | 0.0045236 | 0.0096074 | 48192      | 81                            | 82                              | 163                             |
| URY  | 2014 | country | 2_Amr   | Uruguay             | 246   | 200   | 446   | 0.0050892 | 0.0041376 | 0.0092268 | 48337      | 74                            | 71                              | 144                             |
| URY  | 2015 | country | 2_Amr   | Uruguay             | 241   | 185   | 426   | 0.0049942 | 0.0038337 | 0.008828  | 48256      | 75                            | 84                              | 159                             |
| URY  | 2016 | country | 2_Amr   | Uruguay             | 231   | 174   | 405   | 0.0048056 | 0.0036198 | 0.0084254 | 48069      | 82                            | 73                              | 154                             |
| URY  | 2017 | country | 2_Amr   | Uruguay             | 220   | 162   | 382   | 0.0045811 | 0.0033734 | 0.0079545 | 48023      | 71                            | 66                              | 137                             |
| URY  | 2018 | country | 2_Amr   | Uruguay             | 209   | 150   | 359   | 0.0043678 | 0.0031348 | 0.0075026 | 47850      | 69                            | 61                              | 130                             |
| URY  | 2019 | country | 2_Amr   | Uruguay             | 200   | 137   | 337   | 0.0041967 | 0.0028748 | 0.0070715 | 47656      | 67                            | 56                              | 123                             |
| USA  | 2000 | country | 2_Amr   | United States of Am | 18384 | 14926 | 33310 | 0.004642  | 0.0037689 | 0.0084109 | 3960330    | 4811                          | 3622                            | 8433                            |
| USA  | 2001 | country | 2_Amr   | United States of Am | 18456 | 14587 | 33043 | 0.0046235 | 0.0036543 | 0.0082778 | 3991760    | 4577                          | 3618                            | 8195                            |
| USA  | 2002 | country | 2_Amr   | United States of Am | 18634 | 14271 | 32905 | 0.0046243 | 0.0035415 | 0.0081658 | 4029605    | 4676                          | 3542                            | 8218                            |
| USA  | 2003 | country | 2_Amr   | United States of Am | 18778 | 14060 | 32838 | 0.0046154 | 0.0034557 | 0.0080711 | 4068585    | 4616                          | 3438                            | 8054                            |
| USA  | 2004 | country | 2_Amr   | United States of Am | 18760 | 14027 | 32787 | 0.0045699 | 0.003417  | 0.0079869 | 4105098    | 4683                          | 3451                            | 8135                            |
| USA  | 2005 | country | 2_Amr   | United States of Am | 18574 | 14101 | 32675 | 0.0044926 | 0.0034107 | 0.0079032 | 4134378    | 4415                          | 3499                            | 7914                            |
| USA  | 2006 | country | 2_Amr   | United States of Am | 18277 | 14167 | 32444 | 0.0044036 | 0.0034134 | 0.007817  | 4150462    | 4622                          | 3478                            | 8100                            |
| USA  | 2007 | country | 2_Amr   | United States of Am | 17920 | 14137 | 32057 | 0.0043159 | 0.0034048 | 0.0077208 | 4152053    | 4435                          | 3561                            | 7997                            |
| USA  | 2008 | country | 2_Amr   | United States of Am | 17520 | 13984 | 31504 | 0.004233  | 0.0033787 | 0.0076117 | 4138869    | 4359                          | 3471                            | 7829                            |
| USA  | 2009 | country | 2_Amr   | United States of Am | 17096 | 13709 | 30805 | 0.0041574 | 0.0033338 | 0.0074912 | 4112160    | 4240                          | 3391                            | 7631                            |
| USA  | 2010 | country | 2_Amr   | United States of Am | 16696 | 13325 | 30021 | 0.0040974 | 0.0032702 | 0.0073676 | 4074736    | 4271                          | 3386                            | 7658                            |
| USA  | 2011 | country | 2_Amr   | United States of Am | 16373 | 12834 | 29207 | 0.0040615 | 0.0031836 | 0.0072451 | 4031258    | 4221                          | 3297                            | 7518                            |
| USA  | 2012 | country | 2_Amr   | United States of Am | 16134 | 12295 | 28429 | 0.0040462 | 0.0030834 | 0.0071297 | 3987422    | 4151                          | 3134                            | 7285                            |
| USA  | 2013 | country | 2_Amr   | United States of Am | 15892 | 11835 | 27727 | 0.0040245 | 0.0029971 | 0.0070217 | 3948784    | 3869                          | 3025                            | 6894                            |
| USA  | 2014 | country | 2_Amr   | United States of Am | 15561 | 11567 | 27128 | 0.003971  | 0.0029518 | 0.0069227 | 3918674    | 3804                          | 2951                            | 6754                            |
| USA  | 2015 | country | 2_Amr   | United States of Am | 15201 | 11438 | 26639 | 0.0038977 | 0.0029328 | 0.0068304 | 3900036    | 3880                          | 2852                            | 6732                            |
| USA  | 2016 | country | 2_Amr   | United States of Am | 14929 | 11333 | 26262 | 0.0038338 | 0.0029103 | 0.0067441 | 3894049    | 3768                          | 2830                            | 6597                            |
| USA  | 2017 | country | 2_Amr   | United States of Am | 14781 | 11185 | 25966 | 0.0037911 | 0.0028688 | 0.0066598 | 3898888    | 3705                          | 2812                            | 6517                            |
| USA  | 2018 | country | 2_Amr   | United States of Am | 14681 | 10994 | 25675 | 0.0037529 | 0.0028104 | 0.0065634 | 3911866    | 3711                          | 2763                            | 6474                            |
| USA  | 2019 | country | 2_Amr   | United States of Am | 14546 | 10806 | 25352 | 0.0036997 | 0.0027485 | 0.0064482 | 3931631    | 3665                          | 2716                            | 6381                            |

| iso3 | year | level   | whoreg6 | whoname              | nnd   | pnd   | u5d   | nmr       | pnmr      | u5mr      | Livebirths | Neonatal birth defects deaths | 1-59 month birth defects deaths | Under five birth defects deaths |
|------|------|---------|---------|----------------------|-------|-------|-------|-----------|-----------|-----------|------------|-------------------------------|---------------------------------|---------------------------------|
| UZB  | 2000 | country | 4_Eur   | Uzbekistan           | 15846 | 19760 | 35606 | 0.028127  | 0.0350745 | 0.0632015 | 563373     | 1689                          | 2489                            | 4178                            |
| UZB  | 2001 | country | 4_Eur   | Uzbekistan           | 15108 | 18063 | 33171 | 0.0272947 | 0.0326333 | 0.0599281 | 553514     | 1643                          | 2360                            | 4002                            |
| UZB  | 2002 | country | 4_Eur   | Uzbekistan           | 14474 | 16501 | 30975 | 0.0263409 | 0.0300298 | 0.0563706 | 549488     | 1579                          | 2150                            | 3729                            |
| UZB  | 2003 | country | 4_Eur   | Uzbekistan           | 13986 | 15176 | 29162 | 0.0253756 | 0.0275347 | 0.0529103 | 551159     | 1542                          | 2134                            | 3676                            |
| UZB  | 2004 | country | 4_Eur   | Uzbekistan           | 13620 | 13999 | 27619 | 0.0243992 | 0.0250782 | 0.0494774 | 558215     | 1531                          | 1973                            | 3503                            |
| UZB  | 2005 | country | 4_Eur   | Uzbekistan           | 13331 | 13026 | 26357 | 0.023389  | 0.0228539 | 0.046243  | 569968     | 1485                          | 1919                            | 3405                            |
| UZB  | 2006 | country | 4_Eur   | Uzbekistan           | 13098 | 12154 | 25252 | 0.0223786 | 0.0207658 | 0.0431444 | 585290     | 1485                          | 1798                            | 3283                            |
| UZB  | 2007 | country | 4_Eur   | Uzbekistan           | 12885 | 11353 | 24238 | 0.021387  | 0.0188442 | 0.0402312 | 602468     | 1524                          | 1746                            | 3269                            |
| UZB  | 2008 | country | 4_Eur   | Uzbekistan           | 12632 | 10624 | 23256 | 0.0203782 | 0.0171388 | 0.037517  | 619879     | 1494                          | 1713                            | 3207                            |
| UZB  | 2009 | country | 4_Eur   | Uzbekistan           | 12325 | 9921  | 22246 | 0.0193685 | 0.0155907 | 0.0349592 | 636341     | 1477                          | 1602                            | 3079                            |
| UZB  | 2010 | country | 4_Eur   | Uzbekistan           | 11970 | 9216  | 21186 | 0.0183815 | 0.0141523 | 0.0325338 | 651200     | 1520                          | 1653                            | 3172                            |
| UZB  | 2011 | country | 4_Eur   | Uzbekistan           | 11559 | 8549  | 20108 | 0.0173992 | 0.0128684 | 0.0302675 | 664342     | 1544                          | 1600                            | 3144                            |
| UZB  | 2012 | country | 4_Eur   | Uzbekistan           | 11056 | 7957  | 19013 | 0.0163549 | 0.0117706 | 0.0281256 | 676004     | 1571                          | 1501                            | 3072                            |
| UZB  | 2013 | country | 4_Eur   | Uzbekistan           | 10394 | 7537  | 17931 | 0.015145  | 0.0109821 | 0.0261271 | 686298     | 1564                          | 1425                            | 2989                            |
| UZB  | 2014 | country | 4_Eur   | Uzbekistan           | 9734  | 7110  | 16844 | 0.0140118 | 0.0102346 | 0.0242464 | 694702     | 1582                          | 1423                            | 3005                            |
| UZB  | 2015 | country | 4_Eur   | Uzbekistan           | 9095  | 6679  | 15774 | 0.012983  | 0.0095342 | 0.0225172 | 700533     | 1564                          | 1391                            | 2955                            |
| UZB  | 2016 | country | 4_Eur   | Uzbekistan           | 8465  | 6249  | 14714 | 0.0120446 | 0.0088915 | 0.0209361 | 702804     | 1556                          | 1358                            | 2914                            |
| UZB  | 2017 | country | 4_Eur   | Uzbekistan           | 7856  | 5879  | 13735 | 0.011199  | 0.0083807 | 0.0195798 | 701490     | 1558                          | 1323                            | 2881                            |
| UZB  | 2018 | country | 4_Eur   | Uzbekistan           | 7316  | 5530  | 12846 | 0.010504  | 0.0079398 | 0.0184438 | 696495     | 1477                          | 1282                            | 2759                            |
| UZB  | 2019 | country | 4_Eur   | Uzbekistan           | 6827  | 5218  | 12045 | 0.0099182 | 0.0075807 | 0.0174989 | 688329     | 1430                          | 1241                            | 2670                            |
| VCT  | 2000 | country | 2_Amr   | Saint Vincent and th | 28    | 21    | 49    | 0.0131628 | 0.0098721 | 0.0230349 | 2127       | 6                             | 2                               | 8                               |
| VCT  | 2001 | country | 2_Amr   | Saint Vincent and th | 28    | 19    | 47    | 0.0131351 | 0.0089131 | 0.0220482 | 2132       | 5                             | 2                               | 7                               |
| VCT  | 2002 | country | 2_Amr   | Saint Vincent and th | 27    | 19    | 46    | 0.013114  | 0.0092284 | 0.0223423 | 2059       | 0                             | 1                               | 1                               |
| VCT  | 2003 | country | 2_Amr   | Saint Vincent and th | 26    | 18    | 44    | 0.0130595 | 0.0090412 | 0.0221006 | 1991       | 1                             | 1                               | 2                               |
| VCT  | 2004 | country | 2_Amr   | Saint Vincent and th | 26    | 17    | 43    | 0.0129775 | 0.0084853 | 0.0214629 | 2003       | 5                             | 3                               | 7                               |
| VCT  | 2005 | country | 2_Amr   | Saint Vincent and th | 25    | 17    | 42    | 0.0129059 | 0.008776  | 0.0216819 | 1937       | 5                             | 3                               | 8                               |
| VCT  | 2006 | country | 2_Amr   | Saint Vincent and th | 24    | 17    | 41    | 0.0128619 | 0.0091105 | 0.0219724 | 1866       | 1                             | 5                               | 7                               |
| VCT  | 2007 | country | 2_Amr   | Saint Vincent and th | 24    | 16    | 40    | 0.0128308 | 0.0085539 | 0.0213847 | 1870       | 3                             | 1                               | 4                               |
| VCT  | 2008 | country | 2_Amr   | Saint Vincent and th | 23    | 15    | 38    | 0.0127856 | 0.0083385 | 0.0211241 | 1799       | 2                             | 1                               | 4                               |
| VCT  | 2009 | country | 2_Amr   | Saint Vincent and th | 23    | 14    | 37    | 0.0126915 | 0.0077252 | 0.0204167 | 1812       | 1                             | 0                               | 1                               |
| VCT  | 2010 | country | 2_Amr   | Saint Vincent and th | 22    | 13    | 35    | 0.012503  | 0.0073882 | 0.0198912 | 1760       | 3                             | 3                               | 6                               |
| VCT  | 2011 | country | 2_Amr   | Saint Vincent and th | 21    | 13    | 34    | 0.0122322 | 0.0075723 | 0.0198045 | 1717       | 3                             | 7                               | 10                              |
| VCT  | 2012 | country | 2_Amr   | Saint Vincent and th | 20    | 12    | 32    | 0.0118797 | 0.0071278 | 0.0190076 | 1684       | 0                             | 3                               | 3                               |
| VCT  | 2013 | country | 2_Amr   | Saint Vincent and th | 19    | 11    | 30    | 0.0114609 | 0.0066353 | 0.0180962 | 1658       | 3                             | 1                               | 4                               |
| VCT  | 2014 | country | 2_Amr   | Saint Vincent and th | 18    | 11    | 29    | 0.0110285 | 0.0067396 | 0.0177681 | 1632       | 4                             | 2                               | 6                               |
| VCT  | 2015 | country | 2_Amr   | Saint Vincent and th | 17    | 10    | 27    | 0.0105762 | 0.0062213 | 0.0167976 | 1607       | 4                             | 3                               | 7                               |
| VCT  | 2016 | country | 2_Amr   | Saint Vincent and th | 16    | 10    | 26    | 0.0101465 | 0.0063416 | 0.016488  | 1577       | 2                             | 3                               | 5                               |
| VCT  | 2017 | country | 2_Amr   | Saint Vincent and th | 15    | 10    | 25    | 0.0097533 | 0.0065022 | 0.0162555 | 1538       | 3                             | 3                               | 6                               |
| VCT  | 2018 | country | 2_Amr   | Saint Vincent and th | 15    | 9     | 24    | 0.0094136 | 0.0056481 | 0.0150617 | 1593       | 3                             | 2                               | 5                               |
| VCT  | 2019 | country | 2_Amr   | Saint Vincent and th | 14    | 9     | 23    | 0.0091006 | 0.0058504 | 0.014951  | 1538       | 3                             | 2                               | 5                               |

| iso3 | year | level   | whoreg6 | whoname             | nnd   | pnd   | u5d   | nmr       | pnmr      | u5mr      | Livebirths | Neonatal birth defects deaths | 1-59 month birth defects deaths | Under five birth defects deaths |
|------|------|---------|---------|---------------------|-------|-------|-------|-----------|-----------|-----------|------------|-------------------------------|---------------------------------|---------------------------------|
| VEN  | 2000 | country | 2_Amr   | Venezuela (Bolivar) | 6372  | 5989  | 12361 | 0.0110589 | 0.0103942 | 0.0214531 | 576188     | 897                           | 954                             | 1851                            |
| VEN  | 2001 | country | 2_Amr   | Venezuela (Bolivar) | 6128  | 5892  | 12020 | 0.010593  | 0.0101851 | 0.0207781 | 578494     | 910                           | 956                             | 1866                            |
| VEN  | 2002 | country | 2_Amr   | Venezuela (Bolivar) | 5841  | 5903  | 11744 | 0.0100559 | 0.0101627 | 0.0202186 | 580852     | 868                           | 1056                            | 1924                            |
| VEN  | 2003 | country | 2_Amr   | Venezuela (Bolivar) | 5773  | 5685  | 11458 | 0.0098993 | 0.0097484 | 0.0196477 | 583173     | 764                           | 787                             | 1551                            |
| VEN  | 2004 | country | 2_Amr   | Venezuela (Bolivar) | 5979  | 5146  | 11125 | 0.0102185 | 0.0087948 | 0.0190133 | 585116     | 894                           | 898                             | 1792                            |
| VEN  | 2005 | country | 2_Amr   | Venezuela (Bolivar) | 6193  | 4593  | 10786 | 0.0105503 | 0.0078246 | 0.0183749 | 586996     | 899                           | 968                             | 1867                            |
| VEN  | 2006 | country | 2_Amr   | Venezuela (Bolivar) | 6190  | 4295  | 10485 | 0.0105124 | 0.0072942 | 0.0178066 | 588826     | 999                           | 935                             | 1934                            |
| VEN  | 2007 | country | 2_Amr   | Venezuela (Bolivar) | 6049  | 4205  | 10254 | 0.0102428 | 0.0071204 | 0.0173632 | 590561     | 965                           | 978                             | 1943                            |
| VEN  | 2008 | country | 2_Amr   | Venezuela (Bolivar) | 5962  | 4152  | 10114 | 0.0100714 | 0.0070138 | 0.0170853 | 591972     | 933                           | 949                             | 1881                            |
| VEN  | 2009 | country | 2_Amr   | Venezuela (Bolivar) | 6037  | 4034  | 10071 | 0.010182  | 0.0068037 | 0.0169857 | 592909     | 938                           | 882                             | 1820                            |
| VEN  | 2010 | country | 2_Amr   | Venezuela (Bolivar) | 6226  | 3862  | 10088 | 0.0105079 | 0.0065181 | 0.017026  | 592506     | 1061                          | 931                             | 1992                            |
| VEN  | 2011 | country | 2_Amr   | Venezuela (Bolivar) | 6461  | 3664  | 10125 | 0.0109472 | 0.0062081 | 0.0171552 | 590199     | 1045                          | 890                             | 1935                            |
| VEN  | 2012 | country | 2_Amr   | Venezuela (Bolivar) | 6640  | 3534  | 10174 | 0.0113428 | 0.0060369 | 0.0173797 | 585395     | 1216                          | 886                             | 2101                            |
| VEN  | 2013 | country | 2_Amr   | Venezuela (Bolivar) | 6652  | 3594  | 10246 | 0.0115024 | 0.0062146 | 0.017717  | 578316     | 1193                          | 900                             | 2093                            |
| VEN  | 2014 | country | 2_Amr   | Venezuela (Bolivar) | 6450  | 3882  | 10332 | 0.0113331 | 0.006821  | 0.0181541 | 569127     | 1127                          | 960                             | 2087                            |
| VEN  | 2015 | country | 2_Amr   | Venezuela (Bolivar) | 8067  | 2737  | 10804 | 0.0144486 | 0.0049022 | 0.0193507 | 558326     | 1444                          | 673                             | 2117                            |
| VEN  | 2016 | country | 2_Amr   | Venezuela (Bolivar) | 7989  | 5426  | 13415 | 0.014616  | 0.0099269 | 0.0245429 | 546595     | 1419                          | 1336                            | 2755                            |
| VEN  | 2017 | country | 2_Amr   | Venezuela (Bolivar) | 7835  | 5295  | 13130 | 0.0146461 | 0.0098981 | 0.0245442 | 534953     | 1388                          | 1293                            | 2681                            |
| VEN  | 2018 | country | 2_Amr   | Venezuela (Bolivar) | 7657  | 5204  | 12861 | 0.0146042 | 0.0099256 | 0.0245298 | 524302     | 1363                          | 1270                            | 2632                            |
| VEN  | 2019 | country | 2_Amr   | Venezuela (Bolivar) | 7520  | 5100  | 12620 | 0.0145924 | 0.0098964 | 0.0244888 | 515338     | 1335                          | 1245                            | 2581                            |
| VNM  | 2000 | country | 6_Wpr   | Viet Nam            | 21505 | 22490 | 43995 | 0.0154227 | 0.0161293 | 0.031552  | 1394375    | 2819                          | 2106                            | 4925                            |
| VNM  | 2001 | country | 6_Wpr   | Viet Nam            | 20327 | 20579 | 40906 | 0.0147578 | 0.0149409 | 0.0296987 | 1377371    | 2796                          | 2013                            | 4808                            |
| VNM  | 2002 | country | 6_Wpr   | Viet Nam            | 19403 | 19316 | 38719 | 0.0141245 | 0.0140611 | 0.0281856 | 1373715    | 2828                          | 1943                            | 4771                            |
| VNM  | 2003 | country | 6_Wpr   | Viet Nam            | 18771 | 17557 | 36328 | 0.0136072 | 0.0127274 | 0.0263346 | 1379490    | 2872                          | 1924                            | 4796                            |
| VNM  | 2004 | country | 6_Wpr   | Viet Nam            | 18359 | 16530 | 34889 | 0.0131841 | 0.0118707 | 0.0250548 | 1392511    | 2870                          | 1982                            | 4852                            |
| VNM  | 2005 | country | 6_Wpr   | Viet Nam            | 18148 | 16231 | 34379 | 0.0128644 | 0.0115059 | 0.0243703 | 1410710    | 2921                          | 2027                            | 4948                            |
| VNM  | 2006 | country | 6_Wpr   | Viet Nam            | 18036 | 16282 | 34318 | 0.0125932 | 0.0113686 | 0.0239618 | 1432198    | 3016                          | 2108                            | 5124                            |
| VNM  | 2007 | country | 6_Wpr   | Viet Nam            | 18039 | 16131 | 34170 | 0.0123939 | 0.0110831 | 0.0234771 | 1455468    | 3112                          | 2196                            | 5308                            |
| VNM  | 2008 | country | 6_Wpr   | Viet Nam            | 18083 | 15947 | 34030 | 0.0122269 | 0.0107829 | 0.0230098 | 1478952    | 3202                          | 2295                            | 5496                            |
| VNM  | 2009 | country | 6_Wpr   | Viet Nam            | 18158 | 16428 | 34586 | 0.0120958 | 0.0109431 | 0.0230388 | 1501186    | 3232                          | 2394                            | 5627                            |
| VNM  | 2010 | country | 6_Wpr   | Viet Nam            | 18238 | 16361 | 34599 | 0.0119878 | 0.0107542 | 0.0227421 | 1521377    | 3298                          | 2551                            | 5848                            |
| VNM  | 2011 | country | 6_Wpr   | Viet Nam            | 18278 | 15908 | 34186 | 0.0118695 | 0.0103307 | 0.0222002 | 1539908    | 3369                          | 2667                            | 6036                            |
| VNM  | 2012 | country | 6_Wpr   | Viet Nam            | 18290 | 15944 | 34234 | 0.0117442 | 0.0102378 | 0.021982  | 1557366    | 3451                          | 2754                            | 6205                            |
| VNM  | 2013 | country | 6_Wpr   | Viet Nam            | 18279 | 16027 | 34306 | 0.011614  | 0.0101832 | 0.0217972 | 1573874    | 3542                          | 2805                            | 6347                            |
| VNM  | 2014 | country | 6_Wpr   | Viet Nam            | 18261 | 17998 | 36259 | 0.0114957 | 0.011133  | 0.0228257 | 1588504    | 3614                          | 2909                            | 6522                            |
| VNM  | 2015 | country | 6_Wpr   | Viet Nam            | 18185 | 15724 | 33909 | 0.0113679 | 0.0098292 | 0.0211971 | 1599684    | 3684                          | 2976                            | 6660                            |
| VNM  | 2016 | country | 6_Wpr   | Viet Nam            | 17959 | 15686 | 33645 | 0.0111856 | 0.00977   | 0.0209556 | 1605540    | 3641                          | 3025                            | 6666                            |
| VNM  | 2017 | country | 6_Wpr   | Viet Nam            | 17621 | 15558 | 33179 | 0.0109776 | 0.0096926 | 0.0206702 | 1605178    | 3601                          | 3063                            | 6663                            |
| VNM  | 2018 | country | 6_Wpr   | Viet Nam            | 17143 | 15416 | 32559 | 0.0107264 | 0.0096459 | 0.0203723 | 1598202    | 3540                          | 3068                            | 6608                            |
| VNM  | 2019 | country | 6_Wpr   | Viet Nam            | 16587 | 16340 | 32927 | 0.0104648 | 0.0103088 | 0.0207735 | 1585032    | 3491                          | 3069                            | 6560                            |

| iso3 | year | level   | whoreg6 | whoname | nnd | pnd | u5d | nmr       | pnmr      | u5mr      | Livebirths | Neonatal birth defects deaths | 1-59 month birth defects deaths | Under five birth defects deaths |
|------|------|---------|---------|---------|-----|-----|-----|-----------|-----------|-----------|------------|-------------------------------|---------------------------------|---------------------------------|
| VUT  | 2000 | country | 6_Wpr   | Vanuatu | 78  | 95  | 173 | 0.0125462 | 0.0152807 | 0.0278269 | 6217       | 12                            | 9                               | 21                              |
| VUT  | 2001 | country | 6_Wpr   | Vanuatu | 79  | 97  | 176 | 0.0124198 | 0.0151891 | 0.0276089 | 6361       | 12                            | 10                              | 22                              |
| VUT  | 2002 | country | 6_Wpr   | Vanuatu | 80  | 100 | 180 | 0.0123755 | 0.0154756 | 0.0278511 | 6464       | 12                            | 9                               | 21                              |
| VUT  | 2003 | country | 6_Wpr   | Vanuatu | 82  | 104 | 186 | 0.0124163 | 0.015702  | 0.0281183 | 6604       | 12                            | 8                               | 20                              |
| VUT  | 2004 | country | 6_Wpr   | Vanuatu | 84  | 108 | 192 | 0.0125434 | 0.016197  | 0.0287404 | 6697       | 13                            | 9                               | 22                              |
| VUT  | 2005 | country | 6_Wpr   | Vanuatu | 87  | 107 | 194 | 0.0126116 | 0.0154664 | 0.028078  | 6898       | 13                            | 10                              | 23                              |
| VUT  | 2006 | country | 6_Wpr   | Vanuatu | 89  | 109 | 198 | 0.0127285 | 0.0155906 | 0.0283192 | 6992       | 13                            | 10                              | 24                              |
| VUT  | 2007 | country | 6_Wpr   | Vanuatu | 92  | 111 | 203 | 0.0128676 | 0.015525  | 0.0283926 | 7150       | 14                            | 11                              | 25                              |
| VUT  | 2008 | country | 6_Wpr   | Vanuatu | 95  | 114 | 209 | 0.0129462 | 0.0155354 | 0.0284816 | 7338       | 14                            | 11                              | 25                              |
| VUT  | 2009 | country | 6_Wpr   | Vanuatu | 97  | 119 | 216 | 0.0129559 | 0.0159265 | 0.0288825 | 7487       | 14                            | 12                              | 27                              |
| VUT  | 2010 | country | 6_Wpr   | Vanuatu | 100 | 122 | 222 | 0.0130163 | 0.0158799 | 0.0288963 | 7683       | 15                            | 13                              | 28                              |
| VUT  | 2011 | country | 6_Wpr   | Vanuatu | 102 | 126 | 228 | 0.0130881 | 0.0161677 | 0.0292558 | 7793       | 15                            | 15                              | 30                              |
| VUT  | 2012 | country | 6_Wpr   | Vanuatu | 104 | 128 | 232 | 0.0130922 | 0.0161135 | 0.0292057 | 7944       | 16                            | 16                              | 32                              |
| VUT  | 2013 | country | 6_Wpr   | Vanuatu | 105 | 130 | 235 | 0.0130024 | 0.0160982 | 0.0291006 | 8075       | 16                            | 17                              | 33                              |
| VUT  | 2014 | country | 6_Wpr   | Vanuatu | 106 | 130 | 236 | 0.0128696 | 0.0157835 | 0.0286531 | 8236       | 16                            | 18                              | 34                              |
| VUT  | 2015 | country | 6_Wpr   | Vanuatu | 106 | 131 | 237 | 0.0126706 | 0.0156165 | 0.0282871 | 8366       | 16                            | 16                              | 33                              |
| VUT  | 2016 | country | 6_Wpr   | Vanuatu | 105 | 128 | 233 | 0.0124174 | 0.0151374 | 0.0275547 | 8456       | 17                            | 17                              | 34                              |
| VUT  | 2017 | country | 6_Wpr   | Vanuatu | 104 | 126 | 230 | 0.0121148 | 0.0146775 | 0.0267923 | 8585       | 17                            | 17                              | 34                              |
| VUT  | 2018 | country | 6_Wpr   | Vanuatu | 102 | 126 | 228 | 0.011746  | 0.0145098 | 0.0262558 | 8684       | 17                            | 17                              | 34                              |
| VUT  | 2019 | country | 6_Wpr   | Vanuatu | 100 | 124 | 224 | 0.0113938 | 0.0141283 | 0.0255222 | 8777       | 17                            | 17                              | 33                              |
| WSM  | 2000 | country | 6_Wpr   | Samoa   | 61  | 49  | 110 | 0.011458  | 0.0092813 | 0.0207393 | 5324       | 9                             | 6                               | 15                              |
| WSM  | 2001 | country | 6_Wpr   | Samoa   | 59  | 50  | 109 | 0.0110722 | 0.0093679 | 0.0204402 | 5329       | 9                             | 6                               | 15                              |
| WSM  | 2002 | country | 6_Wpr   | Samoa   | 57  | 45  | 102 | 0.0107799 | 0.0084928 | 0.0192727 | 5288       | 9                             | 6                               | 15                              |
| WSM  | 2003 | country | 6_Wpr   | Samoa   | 56  | 47  | 103 | 0.0105738 | 0.0088484 | 0.0194222 | 5296       | 9                             | 6                               | 15                              |
| WSM  | 2004 | country | 6_Wpr   | Samoa   | 55  | 44  | 99  | 0.0104418 | 0.0083105 | 0.0187523 | 5267       | 9                             | 6                               | 14                              |
| WSM  | 2005 | country | 6_Wpr   | Samoa   | 55  | 49  | 104 | 0.0103508 | 0.0092153 | 0.0195662 | 5314       | 9                             | 6                               | 15                              |
| WSM  | 2006 | country | 6_Wpr   | Samoa   | 55  | 50  | 105 | 0.0103081 | 0.0092943 | 0.0196024 | 5336       | 9                             | 6                               | 14                              |
| WSM  | 2007 | country | 6_Wpr   | Samoa   | 55  | 46  | 101 | 0.0102903 | 0.0085714 | 0.0188618 | 5345       | 9                             | 6                               | 14                              |
| WSM  | 2008 | country | 6_Wpr   | Samoa   | 55  | 48  | 103 | 0.0102901 | 0.0090096 | 0.0192997 | 5345       | 9                             | 6                               | 15                              |
| WSM  | 2009 | country | 6_Wpr   | Samoa   | 54  | 72  | 126 | 0.0102568 | 0.0137189 | 0.0239757 | 5265       | 9                             | 6                               | 15                              |
| WSM  | 2010 | country | 6_Wpr   | Samoa   | 53  | 43  | 96  | 0.0101654 | 0.0082847 | 0.0184502 | 5214       | 9                             | 6                               | 15                              |
| WSM  | 2011 | country | 6_Wpr   | Samoa   | 52  | 46  | 98  | 0.0100608 | 0.0089887 | 0.0190495 | 5169       | 9                             | 6                               | 15                              |
| WSM  | 2012 | country | 6_Wpr   | Samoa   | 50  | 41  | 91  | 0.0099206 | 0.008215  | 0.0181356 | 5040       | 9                             | 6                               | 14                              |
| WSM  | 2013 | country | 6_Wpr   | Samoa   | 49  | 38  | 87  | 0.0097315 | 0.0075449 | 0.0172764 | 5035       | 9                             | 5                               | 14                              |
| WSM  | 2014 | country | 6_Wpr   | Samoa   | 47  | 37  | 84  | 0.0095101 | 0.0074874 | 0.0169974 | 4942       | 9                             | 5                               | 14                              |
| WSM  | 2015 | country | 6_Wpr   | Samoa   | 45  | 37  | 82  | 0.0092756 | 0.0075482 | 0.0168238 | 4851       | 8                             | 5                               | 13                              |
| WSM  | 2016 | country | 6_Wpr   | Samoa   | 44  | 34  | 78  | 0.0090295 | 0.0069269 | 0.0159564 | 4873       | 8                             | 5                               | 13                              |
| WSM  | 2017 | country | 6_Wpr   | Samoa   | 42  | 33  | 75  | 0.0087799 | 0.0069595 | 0.0157394 | 4784       | 8                             | 5                               | 12                              |
| WSM  | 2018 | country | 6_Wpr   | Samoa   | 41  | 27  | 68  | 0.0084857 | 0.0055983 | 0.0140839 | 4832       | 7                             | 4                               | 12                              |
| WSM  | 2019 | country | 6_Wpr   | Samoa   | 39  | 63  | 102 | 0.008219  | 0.0132016 | 0.0214206 | 4745       | 7                             | 4                               | 11                              |

| iso3 | year | level   | whoreg6 | whoname      | nnd   | pnd   | u5d   | nmr       | pnmr      | u5mr      | Livebirths | Neonatal birth defects deaths | 1-59 month birth defects deaths | Under five birth defects deaths |
|------|------|---------|---------|--------------|-------|-------|-------|-----------|-----------|-----------|------------|-------------------------------|---------------------------------|---------------------------------|
| YEM  | 2000 | country | 5_Emr   | Yemen        | 25454 | 42709 | 68163 | 0.0368245 | 0.0617879 | 0.0986124 | 691225     | 1296                          | 718                             | 2014                            |
| YEM  | 2001 | country | 5_Emr   | Yemen        | 24963 | 36695 | 61658 | 0.0357537 | 0.0525576 | 0.0883113 | 698194     | 1327                          | 768                             | 2095                            |
| YEM  | 2002 | country | 5_Emr   | Yemen        | 24483 | 34292 | 58775 | 0.0346584 | 0.0485436 | 0.083202  | 706410     | 1324                          | 610                             | 1933                            |
| YEM  | 2003 | country | 5_Emr   | Yemen        | 24034 | 33721 | 57755 | 0.0335963 | 0.047137  | 0.0807334 | 715376     | 1337                          | 653                             | 1991                            |
| YEM  | 2004 | country | 5_Emr   | Yemen        | 23554 | 33169 | 56723 | 0.0324867 | 0.0457481 | 0.0782348 | 725036     | 1382                          | 858                             | 2239                            |
| YEM  | 2005 | country | 5_Emr   | Yemen        | 23105 | 30137 | 53242 | 0.0314139 | 0.0409747 | 0.0723886 | 735502     | 1371                          | 863                             | 2235                            |
| YEM  | 2006 | country | 5_Emr   | Yemen        | 22658 | 28769 | 51427 | 0.0303341 | 0.0385156 | 0.0688496 | 746949     | 1382                          | 727                             | 2110                            |
| YEM  | 2007 | country | 5_Emr   | Yemen        | 22256 | 24991 | 47247 | 0.0293086 | 0.0329104 | 0.062219  | 759368     | 1367                          | 842                             | 2208                            |
| YEM  | 2008 | country | 5_Emr   | Yemen        | 21850 | 23681 | 45531 | 0.0282813 | 0.0306511 | 0.0589324 | 772595     | 1414                          | 815                             | 2228                            |
| YEM  | 2009 | country | 5_Emr   | Yemen        | 21548 | 22620 | 44168 | 0.0274049 | 0.0287684 | 0.0561733 | 786283     | 1410                          | 732                             | 2142                            |
| YEM  | 2010 | country | 5_Emr   | Yemen        | 21467 | 22142 | 43609 | 0.0268374 | 0.027681  | 0.0545184 | 799892     | 1427                          | 765                             | 2192                            |
| YEM  | 2011 | country | 5_Emr   | Yemen        | 21636 | 22519 | 44155 | 0.0266133 | 0.0276997 | 0.054313  | 812976     | 1465                          | 784                             | 2249                            |
| YEM  | 2012 | country | 5_Emr   | Yemen        | 21941 | 22924 | 44865 | 0.0265941 | 0.0277854 | 0.0543795 | 825031     | 1499                          | 770                             | 2269                            |
| YEM  | 2013 | country | 5_Emr   | Yemen        | 22217 | 22682 | 44899 | 0.0265834 | 0.0271403 | 0.0537237 | 835747     | 1540                          | 953                             | 2493                            |
| YEM  | 2014 | country | 5_Emr   | Yemen        | 22466 | 23300 | 45766 | 0.0265907 | 0.027578  | 0.0541687 | 844881     | 1560                          | 907                             | 2467                            |
| YEM  | 2015 | country | 5_Emr   | Yemen        | 22712 | 24946 | 47658 | 0.0266443 | 0.0292657 | 0.05591   | 852414     | 1627                          | 913                             | 2540                            |
| YEM  | 2016 | country | 5_Emr   | Yemen        | 22856 | 25085 | 47941 | 0.0266244 | 0.0292211 | 0.0558455 | 858462     | 1639                          | 984                             | 2623                            |
| YEM  | 2017 | country | 5_Emr   | Yemen        | 23030 | 25456 | 48486 | 0.0266739 | 0.0294837 | 0.0561576 | 863391     | 1676                          | 876                             | 2553                            |
| YEM  | 2018 | country | 5_Emr   | Yemen        | 23123 | 30220 | 53343 | 0.0266524 | 0.0348328 | 0.0614852 | 867577     | 1701                          | 858                             | 2560                            |
| YEM  | 2019 | country | 5_Emr   | Yemen        | 23220 | 29491 | 52711 | 0.0266541 | 0.0338521 | 0.0605062 | 871160     | 1703                          | 852                             | 2555                            |
| ZAF  | 2000 | country | 1_Afr   | South Africa | 15288 | 57117 | 72405 | 0.0148948 | 0.0556475 | 0.0705423 | 1026399    | 895                           | 1656                            | 2551                            |
| ZAF  | 2001 | country | 1_Afr   | South Africa | 14919 | 59464 | 74383 | 0.0144204 | 0.057477  | 0.0718975 | 1034573    | 873                           | 1514                            | 2387                            |
| ZAF  | 2002 | country | 1_Afr   | South Africa | 14625 | 61923 | 76548 | 0.0139625 | 0.0591174 | 0.0730799 | 1047451    | 863                           | 1350                            | 2213                            |
| ZAF  | 2003 | country | 1_Afr   | South Africa | 14387 | 64787 | 79174 | 0.0135156 | 0.060863  | 0.0743786 | 1064478    | 835                           | 1247                            | 2082                            |
| ZAF  | 2004 | country | 1_Afr   | South Africa | 14202 | 68481 | 82683 | 0.013093  | 0.063133  | 0.076226  | 1084703    | 831                           | 1289                            | 2120                            |
| ZAF  | 2005 | country | 1_Afr   | South Africa | 14054 | 70649 | 84703 | 0.0126978 | 0.063832  | 0.0765299 | 1106803    | 851                           | 1323                            | 2174                            |
| ZAF  | 2006 | country | 1_Afr   | South Africa | 13939 | 72744 | 86683 | 0.0123426 | 0.0644123 | 0.0767549 | 1129344    | 767                           | 1496                            | 2263                            |
| ZAF  | 2007 | country | 1_Afr   | South Africa | 13833 | 69912 | 83745 | 0.0120207 | 0.0607524 | 0.0727731 | 1150768    | 831                           | 1562                            | 2392                            |
| ZAF  | 2008 | country | 1_Afr   | South Africa | 13711 | 63636 | 77347 | 0.0117222 | 0.0544054 | 0.0661277 | 1169659    | 912                           | 1905                            | 2817                            |
| ZAF  | 2009 | country | 1_Afr   | South Africa | 13569 | 55523 | 69092 | 0.0114493 | 0.0468497 | 0.0582989 | 1185140    | 879                           | 2325                            | 3204                            |
| ZAF  | 2010 | country | 1_Afr   | South Africa | 13396 | 47987 | 61383 | 0.0111968 | 0.040109  | 0.0513058 | 1196413    | 906                           | 2354                            | 3261                            |
| ZAF  | 2011 | country | 1_Afr   | South Africa | 13239 | 40673 | 53912 | 0.0110026 | 0.0338025 | 0.0448051 | 1203265    | 1127                          | 2789                            | 3916                            |
| ZAF  | 2012 | country | 1_Afr   | South Africa | 13111 | 36281 | 49392 | 0.0108673 | 0.0300721 | 0.0409395 | 1206461    | 1250                          | 3076                            | 4326                            |
| ZAF  | 2013 | country | 1_Afr   | South Africa | 13068 | 34331 | 47399 | 0.0108279 | 0.0284463 | 0.0392742 | 1206879    | 1257                          | 3074                            | 4332                            |
| ZAF  | 2014 | country | 1_Afr   | South Africa | 13125 | 32386 | 45511 | 0.0108922 | 0.0268766 | 0.0377688 | 1204993    | 1333                          | 3478                            | 4811                            |
| ZAF  | 2015 | country | 1_Afr   | South Africa | 13267 | 31096 | 44363 | 0.0110437 | 0.0258852 | 0.0369289 | 1201316    | 1373                          | 3571                            | 4944                            |
| ZAF  | 2016 | country | 1_Afr   | South Africa | 13434 | 29777 | 43211 | 0.0112304 | 0.0248929 | 0.0361233 | 1196219    | 1349                          | 3369                            | 4718                            |
| ZAF  | 2017 | country | 1_Afr   | South Africa | 13526 | 28931 | 42457 | 0.0113639 | 0.0243065 | 0.0356705 | 1190260    | 1377                          | 2374                            | 3751                            |
| ZAF  | 2018 | country | 1_Afr   | South Africa | 13551 | 27785 | 41336 | 0.0114451 | 0.0234671 | 0.0349123 | 1183997    | 1381                          | 2528                            | 3909                            |
| ZAF  | 2019 | country | 1_Afr   | South Africa | 13489 | 27083 | 40572 | 0.0114524 | 0.0229937 | 0.0344461 | 1177837    | 1368                          | 2527                            | 3894                            |

| iso3 | year | level   | whoreg6 | whoname  | nnd   | pnd   | u5d   | nmr       | pnmr      | u5mr      | Livebirths | Neonatal birth defects deaths | 1-59 month birth defects deaths | Under five birth defects deaths |
|------|------|---------|---------|----------|-------|-------|-------|-----------|-----------|-----------|------------|-------------------------------|---------------------------------|---------------------------------|
| ZMB  | 2000 | country | 1_Afr   | Zambia   | 15977 | 54968 | 70945 | 0.0339018 | 0.1166363 | 0.1505381 | 471273     | 818                           | 329                             | 1147                            |
| ZMB  | 2001 | country | 1_Afr   | Zambia   | 15923 | 51440 | 67363 | 0.033004  | 0.1066218 | 0.1396258 | 482456     | 819                           | 345                             | 1164                            |
| ZMB  | 2002 | country | 1_Afr   | Zambia   | 15705 | 49956 | 65661 | 0.031858  | 0.1013376 | 0.1331956 | 492969     | 828                           | 412                             | 1240                            |
| ZMB  | 2003 | country | 1_Afr   | Zambia   | 15392 | 44478 | 59870 | 0.0306163 | 0.0884713 | 0.1190876 | 502739     | 825                           | 496                             | 1321                            |
| ZMB  | 2004 | country | 1_Afr   | Zambia   | 15042 | 40835 | 55877 | 0.0293896 | 0.0797846 | 0.1091742 | 511813     | 834                           | 634                             | 1468                            |
| ZMB  | 2005 | country | 1_Afr   | Zambia   | 14731 | 38197 | 52928 | 0.0283087 | 0.0734029 | 0.1017116 | 520369     | 837                           | 761                             | 1598                            |
| ZMB  | 2006 | country | 1_Afr   | Zambia   | 14526 | 35874 | 50400 | 0.0274775 | 0.0678602 | 0.0953377 | 528651     | 828                           | 868                             | 1696                            |
| ZMB  | 2007 | country | 1_Afr   | Zambia   | 14427 | 34227 | 48654 | 0.0268666 | 0.0637391 | 0.0906057 | 536987     | 859                           | 1147                            | 2006                            |
| ZMB  | 2008 | country | 1_Afr   | Zambia   | 14399 | 32514 | 46913 | 0.0263936 | 0.0595989 | 0.0859925 | 545549     | 835                           | 1064                            | 1899                            |
| ZMB  | 2009 | country | 1_Afr   | Zambia   | 14435 | 30722 | 45157 | 0.0260362 | 0.0554121 | 0.0814483 | 554420     | 871                           | 1187                            | 2058                            |
| ZMB  | 2010 | country | 1_Afr   | Zambia   | 14498 | 31250 | 45748 | 0.0257331 | 0.0554668 | 0.0811999 | 563400     | 881                           | 1384                            | 2265                            |
| ZMB  | 2011 | country | 1_Afr   | Zambia   | 14566 | 30072 | 44638 | 0.0254618 | 0.0525666 | 0.0780284 | 572073     | 891                           | 1015                            | 1905                            |
| ZMB  | 2012 | country | 1_Afr   | Zambia   | 14630 | 28469 | 43099 | 0.0252142 | 0.0490657 | 0.07428   | 580228     | 906                           | 974                             | 1880                            |
| ZMB  | 2013 | country | 1_Afr   | Zambia   | 14691 | 26830 | 41521 | 0.0249927 | 0.0456429 | 0.0706356 | 587813     | 902                           | 900                             | 1802                            |
| ZMB  | 2014 | country | 1_Afr   | Zambia   | 14739 | 25830 | 40569 | 0.024773  | 0.043415  | 0.068188  | 594962     | 897                           | 1126                            | 2023                            |
| ZMB  | 2015 | country | 1_Afr   | Zambia   | 14769 | 25611 | 40380 | 0.0245302 | 0.0425371 | 0.0670672 | 602075     | 918                           | 1319                            | 2236                            |
| ZMB  | 2016 | country | 1_Afr   | Zambia   | 14790 | 24951 | 39741 | 0.0242546 | 0.0409183 | 0.0651729 | 609782     | 920                           | 1466                            | 2386                            |
| ZMB  | 2017 | country | 1_Afr   | Zambia   | 14806 | 24063 | 38869 | 0.0239396 | 0.0389073 | 0.0628469 | 618473     | 936                           | 1624                            | 2560                            |
| ZMB  | 2018 | country | 1_Afr   | Zambia   | 14849 | 23988 | 38837 | 0.0236236 | 0.0381629 | 0.0617865 | 628567     | 938                           | 1578                            | 2516                            |
| ZMB  | 2019 | country | 1_Afr   | Zambia   | 14902 | 23578 | 38480 | 0.0232805 | 0.0368343 | 0.0601147 | 640107     | 951                           | 1575                            | 2526                            |
| ZWE  | 2000 | country | 1_Afr   | Zimbabwe | 9945  | 23909 | 33854 | 0.0264489 | 0.0635871 | 0.090036  | 376009     | 665                           | 225                             | 890                             |
| ZWE  | 2001 | country | 1_Afr   | Zimbabwe | 10268 | 23485 | 33753 | 0.0270161 | 0.0617907 | 0.0888067 | 380070     | 687                           | 211                             | 898                             |
| ZWE  | 2002 | country | 1_Afr   | Zimbabwe | 10774 | 23265 | 34039 | 0.0279472 | 0.060349  | 0.0882962 | 385513     | 710                           | 194                             | 904                             |
| ZWE  | 2003 | country | 1_Afr   | Zimbabwe | 11372 | 22948 | 34320 | 0.0289878 | 0.0584957 | 0.0874835 | 392302     | 759                           | 187                             | 946                             |
| ZWE  | 2004 | country | 1_Afr   | Zimbabwe | 11982 | 23355 | 35337 | 0.0299296 | 0.0583384 | 0.088268  | 400340     | 785                           | 184                             | 969                             |
| ZWE  | 2005 | country | 1_Afr   | Zimbabwe | 12588 | 23964 | 36552 | 0.0307281 | 0.0584984 | 0.0892266 | 409657     | 812                           | 199                             | 1011                            |
| ZWE  | 2006 | country | 1_Afr   | Zimbabwe | 13224 | 25116 | 38340 | 0.0314592 | 0.0597487 | 0.091208  | 420353     | 849                           | 223                             | 1072                            |
| ZWE  | 2007 | country | 1_Afr   | Zimbabwe | 13858 | 25557 | 39415 | 0.0320741 | 0.0591511 | 0.0912252 | 432062     | 894                           | 224                             | 1118                            |
| ZWE  | 2008 | country | 1_Afr   | Zimbabwe | 14389 | 25909 | 40298 | 0.0323987 | 0.0583376 | 0.0907363 | 444123     | 922                           | 326                             | 1247                            |
| ZWE  | 2009 | country | 1_Afr   | Zimbabwe | 14718 | 25688 | 40406 | 0.0322914 | 0.0563602 | 0.0886515 | 455787     | 947                           | 426                             | 1373                            |
| ZWE  | 2010 | country | 1_Afr   | Zimbabwe | 14781 | 24771 | 39552 | 0.0317268 | 0.0531697 | 0.0848965 | 465883     | 959                           | 669                             | 1628                            |
| ZWE  | 2011 | country | 1_Afr   | Zimbabwe | 14618 | 22941 | 37559 | 0.0308986 | 0.0484917 | 0.0793904 | 473096     | 942                           | 840                             | 1782                            |
| ZWE  | 2012 | country | 1_Afr   | Zimbabwe | 14313 | 20217 | 34530 | 0.0300144 | 0.0423953 | 0.0724097 | 476871     | 950                           | 1108                            | 2057                            |
| ZWE  | 2013 | country | 1_Afr   | Zimbabwe | 13926 | 17914 | 31840 | 0.0291982 | 0.0375605 | 0.0667587 | 476947     | 924                           | 1148                            | 2072                            |
| ZWE  | 2014 | country | 1_Afr   | Zimbabwe | 13494 | 16879 | 30373 | 0.0284959 | 0.0356438 | 0.0641397 | 473542     | 922                           | 1119                            | 2042                            |
| ZWE  | 2015 | country | 1_Afr   | Zimbabwe | 13033 | 16160 | 29193 | 0.0278916 | 0.0345837 | 0.0624752 | 467274     | 908                           | 988                             | 1896                            |
| ZWE  | 2016 | country | 1_Afr   | Zimbabwe | 12550 | 15001 | 27551 | 0.0273335 | 0.0326719 | 0.0600054 | 459143     | 887                           | 1235                            | 2122                            |
| ZWE  | 2017 | country | 1_Afr   | Zimbabwe | 12113 | 14466 | 26579 | 0.0268886 | 0.032112  | 0.0590006 | 450489     | 865                           | 994                             | 1860                            |
| ZWE  | 2018 | country | 1_Afr   | Zimbabwe | 11673 | 13412 | 25085 | 0.0263719 | 0.0303014 | 0.0566733 | 442631     | 826                           | 1023                            | 1849                            |
| ZWE  | 2019 | country | 1_Afr   | Zimbabwe | 11283 | 12877 | 24160 | 0.0258649 | 0.0295191 | 0.055384  | 436228     | 798                           | 967                             | 1765                            |
